# Supplementary material for: A Network Analysis of Multiple Myeloma Related Gene Signatures
Source: PubMed Central journal article supplement (PMC6827160; doi:10.3390/cancers11101452), 2019-09-27

Supplementary Materials

## Network analysis of multiple myeloma related gene signatures

Yu Liu, Haocheng Yu, Seungyeul Yoo, Eunjee Lee, Alessandro Laganà, Samir Parekh, Eric E. Schadt, Li Wang, and Jun Zhu

### Supplementary Tables

**Supplementary Table 1a.** Inconsistencies identified among gene expression, CNV profiles, and metadata (sex, immunoglobulin isotype, and hyperdiploidy).

| samples  | inconsistency                                                   |
|----------|-----------------------------------------------------------------|
| MMRC0021 | sex, not self-aligned between mRNA and CNV                      |
| MMRC0039 | Heavy chain isotype                                             |
| MMRC0182 | not self-aligned between mRNA and CNV                           |
| MMRC0197 | sex, not self-aligned between mRNA and CNV                      |
| MMRC0198 | not self-aligned between mRNA and CNV                           |
| MMRC0207 | Light chain isotype                                             |
| MMRC0220 | not self-aligned between mRNA and CNV                           |
| MMRC0287 | not self-aligned between mRNA and CNV                           |
| MMRC0312 | sex, heavy chain isotype, not self-aligned between mRNA and CNV |
| MMRC0404 | not self-aligned between mRNA and CNV                           |
| MMRC0441 | not self-aligned between mRNA and CNV                           |
| MMRC0442 | Hyperdiploidy, not self-aligned between mRNA and CNV            |

**Supplementary Table 1b.** Profile pairs pertaining to the same patients predicted by *proMODMatcher* for mRNA expression and CNV data.

| mRNA     | CNV      |
|----------|----------|
| MMRC0198 | MMRC0197 |
| MMRC0312 | MMRC0404 |
| MMRC0404 | MMRC0312 |
| MMRC0441 | MMRC0442 |
| MMRC0442 | MMRC0441 |
| MMRC0026 | MMRC0021 |

**Supplementary Table 2.** Informative genes included in the construction of M3CN.

| Gene Symbol  | expression level | STD      |
|--------------|------------------|----------|
| A1BG         | 6.21469          | 0.645233 |
| AACS         | 6.61147          | 0.564781 |
| AAED1        | 7.05104          | 0.874472 |
| AAGAB        | 6.29963          | 0.435014 |
| AAR2         | 6.94667          | 0.423846 |
| AARS         | 9.15425          | 0.618261 |
| AASDH        | 6.01103          | 0.59334  |
| AASDHPPT     | 6.97539          | 0.532538 |
| AB074162     | 4.84621          | 0.714676 |
| AB488780     | 5.65109          | 0.485305 |
| ABCA3        | 6.17598          | 0.41056  |
| ABCA5        | 5.80151          | 0.653924 |
| ABCA7        | 6.13548          | 0.461047 |
| ABCB10       | 6.2787           | 0.980178 |
| ABCB7        | 6.62044          | 0.513687 |
| ABCB9        | 6.05012          | 0.636314 |
| ABCC1        | 6.1035           | 0.454518 |
| ABCC10       | 7.00612          | 0.42682  |
| ABCC5        | 5.18589          | 0.417402 |
| ABCD3        | 6.07773          | 0.628576 |
| ABCE1        | 7.90678          | 0.740026 |
| ABCF1        | 7.92831          | 0.548434 |
| ABCG2        | 6.65254          | 1.94523  |
| ABHD10       | 7.35526          | 0.602539 |
| ABHD12       | 6.59305          | 0.563493 |
| ABHD14A      | 8.74165          | 0.72424  |
| ABHD14A-ACY1 | 6.88479          | 0.551378 |
| ABHD14B      | 7.85104          | 0.765494 |
| ABHD15       | 5.45641          | 0.483958 |
| ABHD17A      | 8.50276          | 0.443415 |
| ABHD17B      | 5.28926          | 0.403444 |
| ABHD17C      | 5.00905          | 0.8208   |
| ABHD2        | 6.59107          | 0.811512 |
| ABHD3        | 8.57408          | 0.625446 |
| ABI1         | 6.7998           | 0.448589 |
| ABLIM1       | 5.53644          | 1.05249  |
| ABO          | 4.97759          | 0.457711 |
| abParts      | 8.10755          | 2.18565  |
| ABRACL       | 7.29928          | 1.19507  |
| ABT1         | 6.91095          | 0.489185 |
| AC004692.5   | 7.70727          | 0.585106 |
| AC004941.5   | 6.49705          | 0.437025 |
| AC004951.6   | 6.84272          | 0.694083 |

|             |         |          |
|-------------|---------|----------|
| AC005523.2  | 5.22986 | 0.427741 |
| AC006129.2  | 7.06059 | 1.185    |
| AC007389.3  | 5.11648 | 0.407099 |
| AC017002.2  | 6.56456 | 1.62597  |
| AC018755.16 | 6.52041 | 0.491044 |
| AC079305.10 | 6.66195 | 0.766249 |
| AC128677.4  | 9.55253 | 1.98032  |
| AC139100.2  | 5.39065 | 0.479016 |
| ACACB       | 5.63552 | 0.472386 |
| ACAD11      | 6.58554 | 0.471767 |
| ACAD8       | 6.76451 | 0.784327 |
| ACAD9       | 6.52338 | 0.44014  |
| ACADM       | 8.59979 | 0.885793 |
| ACADSB      | 5.29831 | 0.431916 |
| ACADV1      | 9.33834 | 0.76671  |
| ACAP3       | 5.66687 | 0.417952 |
| ACAT2       | 6.66058 | 0.563566 |
| ACBD3       | 8.66375 | 0.74114  |
| ACBD5       | 6.0723  | 0.478785 |
| ACBD6       | 7.38651 | 0.585484 |
| ACCS        | 5.92939 | 0.581374 |
| ACD         | 6.84607 | 0.458666 |
| ACIN1       | 6.53644 | 0.50618  |
| ACLY        | 7.64742 | 0.476034 |
| ACN9        | 5.62084 | 0.906419 |
| ACOT1       | 5.33142 | 0.586964 |
| ACOT13      | 7.66427 | 0.725965 |
| ACOT2       | 5.33142 | 0.586964 |
| ACOT7       | 5.77529 | 0.449468 |
| ACOT9       | 7.06488 | 0.485178 |
| ACP2        | 7.68836 | 0.4872   |
| ACP5        | 6.0214  | 1.11657  |
| ACP6        | 5.68017 | 0.448787 |
| ACRBP       | 4.97301 | 0.437166 |
| ACRC        | 5.4339  | 0.5716   |
| ACSF2       | 5.55085 | 0.428895 |
| ACSL1       | 4.86792 | 1.19108  |
| ACSL3       | 6.29393 | 0.60859  |
| ACSL5       | 6.53092 | 0.513121 |
| ACSM3       | 5.28669 | 0.782793 |
| ACSS2       | 6.55799 | 0.472863 |
| ACTB        | 12.1771 | 0.435442 |
| ACTBP9      | 6.5358  | 0.443895 |
| ACTG1       | 12.1635 | 0.537514 |
| ACTG1P4     | 6.99143 | 0.708042 |
| ACTL6A      | 7.43095 | 0.858214 |
| ACTL8       | 5.81708 | 0.579202 |

|           |         |          |
|-----------|---------|----------|
| ACTN1     | 4.87698 | 0.555225 |
| ACTN4     | 7.35827 | 0.484709 |
| ACTR10    | 8.58845 | 0.568121 |
| ACTR2     | 7.22548 | 0.49788  |
| ACTR3     | 8.45508 | 0.479007 |
| ACTR3B    | 4.89437 | 0.480392 |
| ACTR3C    | 5.01371 | 0.521285 |
| ACTR5     | 6.2865  | 0.446308 |
| ACTR6     | 5.57228 | 0.437642 |
| ACVR1     | 7.10181 | 0.761939 |
| ACVR1C    | 5.32689 | 1.03219  |
| ACVR2A    | 5.51174 | 0.559663 |
| ACY3      | 5.10701 | 0.544884 |
| ACYP1     | 6.12255 | 0.728386 |
| ACYP2     | 7.69582 | 0.848563 |
| ADA       | 7.60427 | 0.955726 |
| ADAM10    | 8.51815 | 0.767623 |
| ADAM17    | 6.39348 | 0.453026 |
| ADAM19    | 6.20078 | 0.49817  |
| ADAM28    | 5.15794 | 1.07361  |
| ADAM8     | 5.2593  | 0.406303 |
| ADAM9     | 5.284   | 0.774956 |
| ADAMTS14  | 5.5447  | 0.430223 |
| ADAMTS15  | 4.94044 | 0.774629 |
| ADAP2     | 5.70276 | 0.533955 |
| ADAR      | 10.5869 | 0.572605 |
| ADAT1     | 5.8357  | 0.563166 |
| ADAT2     | 5.03424 | 0.523023 |
| ADCK3     | 6.51744 | 0.443854 |
| ADCY10P1  | 4.89948 | 0.467766 |
| ADCY3     | 5.49733 | 0.438734 |
| ADCY7     | 5.74165 | 0.458371 |
| ADD3      | 8.77508 | 0.832795 |
| ADH5      | 7.51931 | 0.522788 |
| ADHFE1    | 6.60265 | 0.604957 |
| ADIPOR1   | 9.10963 | 0.585401 |
| ADIPOR2   | 7.24073 | 0.543495 |
| ADIRF-AS1 | 5.31593 | 0.460596 |
| ADK       | 5.81295 | 0.469949 |
| ADM       | 9.6342  | 2.06007  |
| ADNP      | 7.47229 | 0.518004 |
| ADNP2     | 7.37325 | 0.585409 |
| ADO       | 6.647   | 0.651958 |
| ADORA2A   | 6.77997 | 0.634214 |
| ADPGK     | 8.28243 | 0.496198 |
| ADPRHL2   | 6.61158 | 0.49048  |
| ADPRM     | 5.99994 | 0.506364 |

|           |         |          |
|-----------|---------|----------|
| ADRA2C    | 5.51868 | 0.410731 |
| ADRB2     | 6.18278 | 1.16656  |
| ADRM1     | 7.97247 | 0.457206 |
| ADSL      | 8.53999 | 0.647667 |
| ADSS      | 5.13063 | 0.412394 |
| ADSSL1    | 5.20372 | 0.438553 |
| ADTRP     | 5.84309 | 1.45365  |
| AEBP1     | 6.39757 | 0.587432 |
| AEN       | 7.46616 | 0.450918 |
| AES       | 8.19014 | 0.647554 |
| AF007147  | 5.58092 | 0.620948 |
| AF090939  | 5.81706 | 0.602326 |
| AFAP1-AS1 | 5.08911 | 1.17308  |
| AFF4      | 5.2236  | 0.4104   |
| AFMID     | 5.34851 | 0.444393 |
| AFTPH     | 8.19991 | 0.411735 |
| AGA       | 8.8297  | 0.982531 |
| AGAP1     | 4.80325 | 0.512319 |
| AGFG1     | 5.523   | 0.408673 |
| AGK       | 5.55843 | 0.484633 |
| AGL       | 6.78223 | 0.858773 |
| AGO2      | 5.28637 | 0.474342 |
| AGO3      | 5.09244 | 0.485137 |
| AGPAT1    | 7.29732 | 0.459153 |
| AGPAT2    | 6.34612 | 0.401432 |
| AGPAT5    | 5.82265 | 0.604327 |
| AGPS      | 5.6101  | 0.671753 |
| AGTPBP1   | 6.19783 | 0.453931 |
| AHCTF1    | 5.40913 | 0.519342 |
| AHCY      | 8.05794 | 0.852394 |
| AHCYL1    | 6.37777 | 0.493916 |
| AHI1      | 5.15126 | 0.446925 |
| AHNAK     | 6.09742 | 0.743202 |
| AHSA1     | 7.87063 | 0.633367 |
| AHSA2     | 6.74601 | 0.464932 |
| AHSP      | 5.44641 | 0.831006 |
| AIDA      | 8.84338 | 0.696347 |
| AIF1      | 5.70125 | 0.562981 |
| AIFM1     | 7.20868 | 0.66465  |
| AIG1      | 6.14741 | 0.46362  |
| AIM2      | 8.86627 | 1.11861  |
| AIMP1     | 7.30292 | 0.546699 |
| AIMP2     | 7.45078 | 0.509681 |
| AIP       | 7.65696 | 0.501349 |
| AJ420595  | 5.40463 | 1.00493  |
| AJAP1     | 5.24809 | 1.03963  |
| AK022030  | 7.05124 | 0.724158 |

|             |         |          |
|-------------|---------|----------|
| AK025288    | 6.09571 | 1.27022  |
| AK026714    | 10.5975 | 1.26265  |
| AK055981    | 5.97992 | 0.632038 |
| AK057657    | 8.4207  | 0.585483 |
| AK057978    | 5.96589 | 0.729114 |
| AK090844    | 6.31803 | 0.597152 |
| AK091028    | 4.95617 | 0.41532  |
| AK096592    | 6.20061 | 0.598922 |
| AK1         | 6.07842 | 0.415877 |
| AK2         | 6.15022 | 0.429514 |
| AK3         | 9.10327 | 0.586316 |
| AK6         | 9.19068 | 0.546909 |
| AKAP1       | 6.54482 | 0.557978 |
| AKAP10      | 5.89243 | 0.470902 |
| AKAP11      | 6.56788 | 0.681903 |
| AKAP13      | 6.37867 | 0.458701 |
| AKAP17A     | 6.65039 | 0.407718 |
| AKAP2       | 8.78727 | 0.592077 |
| AKAP7       | 5.89567 | 0.411719 |
| AKAP9       | 6.03477 | 0.421876 |
| AKIP1       | 6.62279 | 0.462198 |
| AKIRIN1     | 7.12967 | 0.473345 |
| AKIRIN2     | 6.65313 | 0.698994 |
| AKNA        | 5.26104 | 0.485002 |
| AKR1A1      | 9.39156 | 0.525935 |
| AKR1B1      | 8.37229 | 0.979682 |
| AKR7A2      | 7.34682 | 0.539264 |
| AKT1        | 6.62199 | 0.539745 |
| AKT1S1      | 5.49021 | 0.450108 |
| AKTIP       | 6.83824 | 0.469216 |
| AL022341.3  | 5.67603 | 0.474572 |
| AL110181    | 5.46963 | 0.443827 |
| AL832909    | 6.35139 | 0.734422 |
| AL833181    | 5.20132 | 0.97366  |
| AL928742.12 | 5.2176  | 0.417492 |
| AL928768.3  | 7.80379 | 2.97053  |
| ALAS1       | 6.99842 | 0.703665 |
| ALCAM       | 6.84616 | 1.26862  |
| ALDH16A1    | 6.99991 | 0.455843 |
| ALDH18A1    | 8.54842 | 0.432165 |
| ALDH1L2     | 6.13404 | 0.874968 |
| ALDH2       | 7.09891 | 1.20799  |
| ALDH3A2     | 7.50248 | 0.461442 |
| ALDH5A1     | 5.56479 | 0.766158 |
| ALDH6A1     | 6.19498 | 0.637871 |
| ALDH9A1     | 9.35676 | 0.537841 |
| ALDOA       | 9.57557 | 0.476895 |

|          |         |          |
|----------|---------|----------|
| ALDOC    | 6.66075 | 0.536795 |
| ALG11    | 7.06049 | 0.662687 |
| ALG13    | 6.82463 | 0.503028 |
| ALG14    | 6.48792 | 0.508182 |
| ALG2     | 7.43818 | 0.464924 |
| ALG3     | 8.79263 | 0.542539 |
| ALG5     | 6.16735 | 0.429734 |
| ALG6     | 7.49857 | 0.637907 |
| ALG8     | 9.25449 | 0.563772 |
| ALG9     | 7.32992 | 0.486908 |
| ALKBH2   | 6.40432 | 0.656888 |
| ALKBH3   | 7.10349 | 0.577085 |
| ALKBH5   | 7.33808 | 0.403266 |
| ALKBH6   | 6.45975 | 0.556851 |
| ALKBH8   | 4.96112 | 0.55148  |
| ALMS1    | 6.48434 | 0.502521 |
| ALOX5    | 6.44399 | 0.817457 |
| ALOX5AP  | 7.70994 | 1.76865  |
| ALYREF   | 7.96569 | 0.743032 |
| AMD1     | 8.11388 | 0.60222  |
| AMFR     | 5.71892 | 0.656205 |
| AMICA1   | 5.3775  | 0.536264 |
| AMIGO2   | 5.62525 | 1.56984  |
| AMMECR1  | 5.41822 | 0.709339 |
| AMMECR1L | 6.80642 | 0.611023 |
| AMN1     | 4.97015 | 0.55296  |
| AMPD1    | 9.64709 | 1.54058  |
| AMPD2    | 6.8356  | 0.515766 |
| AMPD3    | 5.21745 | 0.60759  |
| AMT      | 7.02061 | 0.541619 |
| AMY1A    | 6.46368 | 0.896307 |
| AMY1B    | 6.46368 | 0.896307 |
| AMY1C    | 6.46368 | 0.896307 |
| AMY2A    | 6.46368 | 0.896307 |
| AMY2B    | 6.99143 | 0.708042 |
| AMZ2     | 9.20754 | 0.404186 |
| AMZ2P1   | 6.56584 | 0.497483 |
| ANAPC10  | 5.63526 | 0.546252 |
| ANAPC15  | 7.6403  | 0.40305  |
| ANAPC2   | 6.90262 | 0.478128 |
| ANAPC4   | 7.51114 | 0.467751 |
| ANAPC5   | 8.0801  | 0.431267 |
| ANAPC7   | 6.58153 | 0.507264 |
| ANG      | 6.15292 | 1.21484  |
| ANGEL2   | 5.73517 | 0.52518  |
| ANKDD1A  | 6.82357 | 0.720324 |
| ANKEF1   | 4.89678 | 0.488184 |

|                 |         |          |
|-----------------|---------|----------|
| ANKH            | 4.90764 | 0.411884 |
| ANKHD1-EIF4EBP3 | 7.82382 | 0.409598 |
| ANKIB1          | 6.61877 | 0.434108 |
| ANKMY2          | 7.48385 | 0.639528 |
| ANKRA2          | 7.52516 | 0.506981 |
| ANKRD10-IT1     | 7.39881 | 0.702631 |
| ANKRD12         | 6.86911 | 0.649301 |
| ANKRD13A        | 6.74569 | 0.559906 |
| ANKRD13C        | 4.88777 | 0.482774 |
| ANKRD16         | 6.75599 | 0.566863 |
| ANKRD17         | 7.9121  | 0.551514 |
| ANKRD20A1       | 5.2635  | 0.562934 |
| ANKRD20A11P     | 8.76459 | 1.22445  |
| ANKRD20A2       | 5.2635  | 0.562934 |
| ANKRD20A3       | 5.2635  | 0.562934 |
| ANKRD20A4       | 5.2635  | 0.562934 |
| ANKRD20A5P      | 6.40151 | 0.951935 |
| ANKRD20A9P      | 9.30384 | 1.34837  |
| ANKRD27         | 7.13754 | 0.696251 |
| ANKRD28         | 8.57062 | 0.761848 |
| ANKRD33B        | 5.15224 | 0.776456 |
| ANKRD36         | 5.11709 | 0.597865 |
| ANKRD36B        | 9.22737 | 0.89438  |
| ANKRD36BP2      | 7.39004 | 0.821715 |
| ANKRD37         | 6.37518 | 0.609335 |
| ANKRD44         | 5.19556 | 0.529591 |
| ANKRD46         | 6.921   | 0.669486 |
| ANKRD49         | 8.23266 | 0.696264 |
| ANKRD6          | 5.18167 | 0.761349 |
| ANKS1A          | 6.24824 | 0.536038 |
| ANO10           | 6.32967 | 0.538522 |
| ANO5            | 5.25767 | 0.837159 |
| ANO9            | 5.91595 | 0.509519 |
| ANP32A          | 8.03434 | 0.628266 |
| ANP32B          | 11.2604 | 0.461767 |
| ANP32E          | 8.44074 | 0.903811 |
| ANTXR2          | 5.07924 | 0.692249 |
| ANXA1           | 5.22026 | 1.77321  |
| ANXA11          | 6.98358 | 0.496311 |
| ANXA2           | 8.95301 | 0.465007 |
| ANXA2P2         | 8.95991 | 0.52961  |
| ANXA2R          | 7.01496 | 0.713163 |
| ANXA4           | 6.2636  | 0.929043 |
| ANXA5           | 9.92163 | 0.500996 |
| ANXA6           | 6.76443 | 0.527613 |
| ANXA7           | 9.40383 | 0.465859 |
| AOAH            | 5.32827 | 0.565316 |



|             |         |          |
|-------------|---------|----------|
| AP000525.9  | 6.34579 | 1.30938  |
| AP001462.6  | 5.05024 | 0.471056 |
| AP1G1       | 6.44149 | 0.550843 |
| AP1M1       | 6.86859 | 0.458115 |
| AP1S1       | 5.64573 | 0.41392  |
| AP1S2       | 7.49139 | 1.04756  |
| AP2B1       | 7.0053  | 0.550498 |
| AP2M1       | 8.8074  | 0.436803 |
| AP2S1       | 8.1521  | 0.415239 |
| AP3M1       | 6.79424 | 0.514651 |
| AP3S1       | 10.2634 | 0.579221 |
| AP5B1       | 5.30371 | 0.439871 |
| AP5M1       | 6.05875 | 0.466172 |
| APBA3       | 6.26625 | 0.406505 |
| APBB1IP     | 5.50797 | 0.677945 |
| APBB3       | 6.47076 | 0.528358 |
| APC         | 5.22195 | 0.403897 |
| APEX1       | 10.1273 | 0.614892 |
| APH1A       | 6.55342 | 0.436955 |
| APH1B       | 6.75233 | 0.620882 |
| API5        | 6.52784 | 0.488727 |
| APITD1      | 5.94298 | 0.825303 |
| APITD1-CORT | 5.94298 | 0.825303 |
| APLP2       | 6.70306 | 0.699882 |
| APMAP       | 7.59185 | 0.510358 |
| APOA1BP     | 9.44745 | 0.603323 |
| APOBEC2     | 5.22801 | 0.464361 |
| APOBEC3B    | 6.18036 | 1.49924  |
| APOBEC3C    | 7.67422 | 0.476787 |
| APOBEC3G    | 7.29852 | 0.501756 |
| APOC1       | 6.24801 | 0.413761 |
| APOE        | 6.21351 | 0.529286 |
| APOL1       | 7.62601 | 0.771236 |
| APOL3       | 6.44941 | 0.96055  |
| APOL6       | 6.4442  | 0.660255 |
| APOM        | 6.09665 | 0.459978 |
| APOO        | 7.29018 | 0.577527 |
| APOOL       | 5.86839 | 0.515704 |
| APP         | 6.44612 | 1.55475  |
| APPBP2      | 5.18028 | 0.52098  |
| APPL1       | 6.09492 | 0.723688 |
| APPL2       | 5.51064 | 0.630694 |
| APRT        | 8.20599 | 0.565238 |
| AQP3        | 8.53925 | 0.709937 |
| AQP5        | 4.98747 | 0.448494 |
| AQP9        | 4.80971 | 0.754081 |
| AQR         | 5.95996 | 0.460875 |

|             |         |          |
|-------------|---------|----------|
| ARCN1       | 9.35522 | 0.566712 |
| ARF3        | 7.2849  | 0.494535 |
| ARF4        | 10.6962 | 0.543002 |
| ARF5        | 7.13586 | 0.405125 |
| ARF6        | 8.29295 | 0.449952 |
| ARFGAP3     | 8.86908 | 0.59879  |
| ARFGEF1     | 6.4866  | 0.578255 |
| ARFIP1      | 6.56766 | 0.745391 |
| ARFIP2      | 8.28757 | 0.476898 |
| ARGLU1      | 6.94722 | 0.504323 |
| ARHGAP12    | 5.77932 | 0.681511 |
| ARHGAP15    | 5.23271 | 0.633789 |
| ARHGAP17    | 6.53923 | 0.664191 |
| ARHGAP18    | 6.2923  | 0.799109 |
| ARHGAP21    | 6.0585  | 0.522524 |
| ARHGAP30    | 7.61911 | 0.445023 |
| ARHGAP4     | 7.1281  | 0.603117 |
| ARHGAP5     | 5.03106 | 0.515777 |
| ARHGAP5-AS1 | 4.88892 | 0.460924 |
| ARHGAP9     | 6.55759 | 0.78665  |
| ARHGDIA     | 6.8489  | 0.529835 |
| ARHGDIB     | 8.53232 | 0.681317 |
| ARHGDIG     | 4.91273 | 0.444131 |
| ARHGEF18    | 7.35574 | 0.5853   |
| ARHGEF2     | 7.28968 | 0.473586 |
| ARHGEF3     | 7.57587 | 1.07809  |
| ARHGEF6     | 7.37405 | 1.03211  |
| ARHGEF9     | 5.73714 | 0.508758 |
| ARID2       | 6.43191 | 0.562704 |
| ARID3A      | 6.66218 | 0.435378 |
| ARID3B      | 7.09759 | 0.470822 |
| ARID4A      | 5.57869 | 0.654358 |
| ARID5A      | 6.51997 | 0.730237 |
| ARID5B      | 5.41279 | 0.613535 |
| ARIH1       | 6.77518 | 0.503579 |
| ARIH2OS     | 4.91636 | 0.636801 |
| ARL1        | 8.33533 | 0.611738 |
| ARL14EP     | 7.22688 | 0.789869 |
| ARL2        | 7.04965 | 0.462245 |
| ARL2BP      | 7.69318 | 0.529481 |
| ARL4A       | 7.51213 | 0.947673 |
| ARL4C       | 5.47021 | 1.0304   |
| ARL5A       | 7.64565 | 0.479051 |
| ARL5B       | 5.7342  | 0.481439 |
| ARL6IP1     | 8.24031 | 0.858559 |
| ARL6IP5     | 9.72772 | 0.881155 |
| ARL6IP6     | 5.81704 | 0.443979 |

|                |         |          |
|----------------|---------|----------|
| ARL8A          | 6.37204 | 0.413591 |
| ARL8B          | 7.88123 | 0.565675 |
| ARMC1          | 8.46809 | 0.644011 |
| ARMC10         | 7.79375 | 0.495441 |
| ARMC2          | 6.45436 | 1.42674  |
| ARMC2-AS1      | 10.5085 | 0.516945 |
| ARMC5          | 6.56581 | 0.447146 |
| ARMC8          | 5.70026 | 0.441779 |
| ARMCX2         | 7.00315 | 1.244    |
| ARMCX3         | 8.49011 | 0.668835 |
| ARMCX5         | 5.98538 | 0.650835 |
| ARMCX5-GPRASP2 | 4.8676  | 0.721292 |
| ARNTL          | 5.14179 | 0.442487 |
| ARPC1A         | 9.19478 | 0.614568 |
| ARPC1B         | 8.64497 | 0.699697 |
| ARPC2          | 9.90518 | 0.46461  |
| ARPC3          | 9.74486 | 0.488096 |
| ARPC5          | 7.36608 | 0.560273 |
| ARPC5L         | 9.15025 | 0.733286 |
| ARPP19         | 8.0637  | 0.65851  |
| ARRB2          | 5.63339 | 0.48896  |
| ARRDC3         | 8.53395 | 0.889334 |
| ARRDC4         | 4.88175 | 1.03913  |
| ARSG           | 5.80608 | 0.552719 |
| ARTN           | 5.31939 | 0.549176 |
| ARX            | 5.10314 | 0.669625 |
| ASAH1          | 7.77987 | 0.458757 |
| ASAP1          | 6.42638 | 0.58565  |
| ASAP1-IT1      | 4.93888 | 0.581374 |
| ASB16-AS1      | 5.15907 | 0.422984 |
| ASB7           | 5.61937 | 0.552805 |
| ASB8           | 6.45397 | 0.476286 |
| ASCC1          | 6.89727 | 0.632972 |
| ASCC2          | 6.25033 | 0.486869 |
| ASCC3          | 6.95427 | 0.622113 |
| ASF1A          | 6.68214 | 0.968232 |
| ASF1B          | 5.87408 | 0.69073  |
| ASH1L          | 7.29129 | 0.478417 |
| ASH1L-AS1      | 6.7915  | 0.844079 |
| ASH2L          | 7.49996 | 0.524876 |
| ASL            | 6.77731 | 0.466755 |
| ASMTL          | 6.99081 | 0.517673 |
| ASNA1          | 7.75419 | 0.477042 |
| ASNS           | 6.33405 | 0.499034 |
| ASNSD1         | 8.29303 | 0.561232 |
| ASPHD2         | 6.72472 | 0.798304 |
| ASPSCR1        | 5.75312 | 0.428414 |

|         |         |          |
|---------|---------|----------|
| ASRGL1  | 5.76838 | 0.492945 |
| ASS1    | 7.81284 | 2.18649  |
| ASTE1   | 5.81705 | 0.537652 |
| ASUN    | 8.61656 | 0.846503 |
| ASXL1   | 6.85299 | 0.458481 |
| ASXL2   | 5.73071 | 0.436315 |
| ATAD1   | 7.09771 | 0.497149 |
| ATF1    | 6.51027 | 0.634345 |
| ATF2    | 5.56272 | 0.46499  |
| ATF3    | 7.91046 | 1.13175  |
| ATF4    | 11.6117 | 0.483245 |
| ATF5    | 6.55911 | 0.732032 |
| ATF6    | 7.87062 | 0.698729 |
| ATF7IP2 | 5.84429 | 0.838921 |
| ATG12   | 7.19136 | 0.462609 |
| ATG14   | 6.34055 | 0.606595 |
| ATG16L2 | 6.20141 | 0.597778 |
| ATG2A   | 7.35431 | 0.410917 |
| ATG2B   | 5.62945 | 0.44903  |
| ATG3    | 6.79684 | 0.431816 |
| ATG4A   | 7.79188 | 0.534873 |
| ATG4C   | 6.55684 | 0.866879 |
| ATG5    | 7.04545 | 0.541697 |
| ATHL1   | 5.96    | 0.415749 |
| ATIC    | 8.95051 | 0.585516 |
| ATL1    | 5.40077 | 0.701119 |
| ATL3    | 5.96573 | 0.446213 |
| ATM     | 6.38158 | 0.407865 |
| ATOX1   | 8.71226 | 0.598396 |
| ATP10B  | 6.50477 | 1.67158  |
| ATP10D  | 7.1957  | 1.13096  |
| ATP11B  | 6.67282 | 0.603329 |
| ATP11C  | 5.16749 | 0.782752 |
| ATP13A1 | 9.00079 | 0.638484 |
| ATP13A2 | 5.94822 | 0.578919 |
| ATP13A3 | 6.14553 | 0.738256 |
| ATP1A1  | 7.91662 | 0.54585  |
| ATP1B1  | 6.78236 | 1.64613  |
| ATP2A3  | 7.11657 | 0.592689 |
| ATP2B1  | 6.18116 | 0.842299 |
| ATP2B4  | 6.14453 | 0.685246 |
| ATP2C1  | 5.81508 | 0.566854 |
| ATP5B   | 10.4662 | 0.419596 |
| ATP5D   | 8.55334 | 0.569127 |
| ATP5G1  | 8.86966 | 0.513073 |
| ATP5G3  | 9.05166 | 0.404437 |
| ATP5I   | 10.0953 | 0.439247 |

|                 |         |          |
|-----------------|---------|----------|
| ATP5J           | 10.8335 | 0.530657 |
| ATP5L           | 11.3796 | 0.498815 |
| ATP6            | 10.3977 | 0.409679 |
| ATP6AP1         | 9.16664 | 0.710979 |
| ATP6AP2         | 7.20404 | 0.428973 |
| ATP6V0A1        | 6.71572 | 0.453242 |
| ATP6V0B         | 9.18394 | 0.506962 |
| ATP6V0C         | 9.0741  | 0.42797  |
| ATP6V0D1        | 8.45215 | 0.506371 |
| ATP6V0E1        | 7.93463 | 0.452541 |
| ATP6V0E2        | 5.20495 | 0.690355 |
| ATP6V1A         | 8.4931  | 0.675818 |
| ATP6V1B2        | 6.98595 | 0.660149 |
| ATP6V1C1        | 6.10082 | 0.616116 |
| ATP6V1E1        | 8.55152 | 0.533766 |
| ATP6V1E2        | 5.0861  | 0.44834  |
| ATP6V1F         | 9.38528 | 0.449613 |
| ATP6V1G1        | 8.69732 | 0.40574  |
| ATP6V1G2-DDX39B | 7.57275 | 0.550332 |
| ATP7A           | 5.62575 | 0.527991 |
| ATP8A2          | 4.85277 | 0.9021   |
| ATP8B2          | 8.59937 | 0.588868 |
| ATPAF1          | 7.08395 | 0.49234  |
| ATPIF1          | 7.74908 | 0.452443 |
| ATRAID          | 10.8553 | 0.521856 |
| ATRN            | 6.45878 | 0.449088 |
| ATRX            | 7.19125 | 0.749414 |
| ATXN1           | 6.51422 | 0.591383 |
| ATXN10          | 7.75545 | 0.436573 |
| ATXN1L          | 7.43666 | 0.543988 |
| ATXN2           | 6.60064 | 0.442451 |
| ATXN2L          | 6.00373 | 0.414906 |
| ATXN7L3B        | 7.27131 | 0.455185 |
| AUH             | 8.38866 | 0.567669 |
| AUP1            | 9.05857 | 0.412394 |
| AURKAPS1        | 6.94    | 0.498016 |
| AURKB           | 4.82296 | 0.581676 |
| AVEN            | 8.05872 | 0.664079 |
| AVPI1           | 6.55548 | 0.544256 |
| AX746823        | 5.49637 | 0.932123 |
| AX747182        | 6.84272 | 0.694083 |
| AX747730        | 5.073   | 0.630952 |
| AX747826        | 7.0886  | 1.03099  |
| AX748157        | 5.2835  | 0.405749 |
| AY940074        | 6.31599 | 0.456381 |
| AZGP1           | 5.70804 | 1.88235  |
| AZGP1P1         | 5.07074 | 0.527679 |

|          |         |          |
|----------|---------|----------|
| AZIN1    | 9.09398 | 0.640295 |
| AZU1     | 4.89179 | 0.968608 |
| B2M      | 11.7438 | 0.436909 |
| B3GNT2   | 5.35168 | 0.472995 |
| B3GNT8   | 4.89951 | 0.412622 |
| B3GNT9   | 6.39215 | 0.535887 |
| B3GNTL1  | 5.33611 | 0.415638 |
| B4GALT1  | 5.31873 | 0.482391 |
| B4GALT4  | 7.28688 | 0.425495 |
| B4GALT5  | 6.5665  | 0.641947 |
| B9D1     | 6.11163 | 0.52552  |
| BABAM1   | 8.05118 | 0.431469 |
| BACH2    | 5.17244 | 0.706941 |
| BAG1     | 7.40568 | 0.470117 |
| BAG3     | 6.61714 | 1.01181  |
| BAG4     | 5.63895 | 0.567225 |
| BAG5     | 5.96718 | 0.598635 |
| BAGE2    | 5.04182 | 0.853082 |
| BAGE3    | 4.81932 | 0.758077 |
| BAGE4    | 5.26432 | 0.987105 |
| BAGE5    | 4.81932 | 0.758077 |
| BAI1     | 5.97721 | 0.430359 |
| BAK1     | 6.47926 | 0.506634 |
| BANF1    | 9.17699 | 0.746803 |
| BANK1    | 6.40021 | 1.38553  |
| BARD1    | 5.81051 | 0.591682 |
| BARX2    | 4.87704 | 0.427105 |
| BASP1    | 5.95325 | 1.14335  |
| BATF     | 6.46426 | 0.459426 |
| BATF3    | 5.64704 | 0.609114 |
| BAX      | 6.11464 | 0.549966 |
| BAZ1A    | 6.48275 | 0.819989 |
| BAZ2B    | 7.70835 | 0.786646 |
| BBC3     | 6.83255 | 0.438232 |
| BBS2     | 5.42188 | 0.51745  |
| BBS4     | 5.4059  | 0.525568 |
| BBX      | 8.05477 | 0.613641 |
| BC005081 | 5.52274 | 0.60478  |
| BC017398 | 6.10777 | 2.2316   |
| BC019672 | 5.46676 | 0.660106 |
| BC022047 | 5.66359 | 0.723578 |
| BC022568 | 5.65388 | 0.67572  |
| BC030152 | 6.01016 | 0.436102 |
| BC034319 | 5.13685 | 1.1988   |
| BC036830 | 4.90834 | 0.919506 |
| BC039681 | 5.99317 | 0.48171  |
| BC041025 | 6.07232 | 0.871509 |

|               |         |          |
|---------------|---------|----------|
| BC044596      | 5.71003 | 0.491431 |
| BC047484      | 7.79432 | 0.475653 |
| BC048103      | 5.31679 | 0.777497 |
| BC062753      | 6.66154 | 0.622908 |
| BC069804      | 4.82947 | 1.45895  |
| BC070363      | 7.59733 | 0.740596 |
| BCAP29        | 5.22403 | 0.434983 |
| BCAP31        | 9.02637 | 0.693455 |
| BCAR3         | 5.06532 | 0.853407 |
| BCAS1         | 5.39423 | 0.489884 |
| BCAS2         | 8.99879 | 0.485124 |
| BCAS3         | 5.4713  | 0.442333 |
| BCCIP         | 6.6991  | 0.482264 |
| BCDIN3D       | 5.55729 | 0.554496 |
| BCKDHB        | 6.47624 | 0.513157 |
| BCKDK         | 7.10357 | 0.456412 |
| BCL10         | 5.63162 | 0.628298 |
| BCL11A        | 6.76815 | 1.29662  |
| BCL2          | 6.59717 | 0.465981 |
| BCL2A1        | 5.07236 | 1.20452  |
| BCL2L1        | 6.35936 | 0.577636 |
| BCL2L11       | 7.88012 | 0.798436 |
| BCL2L2-PABPN1 | 8.05298 | 0.4262   |
| BCL3          | 5.89018 | 0.472921 |
| BCL6          | 4.93896 | 0.814012 |
| BCL7B         | 6.89129 | 0.400931 |
| BCL7C         | 6.65141 | 0.402071 |
| BCLAF1        | 7.58988 | 0.602149 |
| BCOR          | 5.27216 | 0.573995 |
| BCR           | 6.2114  | 0.451361 |
| BCS1L         | 7.19284 | 0.54583  |
| BD495725      | 5.67733 | 0.729949 |
| BDH2          | 5.14155 | 0.495487 |
| BDP1          | 5.58252 | 0.462655 |
| BEND3         | 6.26293 | 0.421092 |
| BET1          | 8.41049 | 0.91145  |
| BET1L         | 7.12512 | 0.407676 |
| BEX2          | 8.02148 | 1.31124  |
| BEX4          | 6.52785 | 1.7741   |
| BEX5          | 8.08182 | 2.04933  |
| BFAR          | 7.56789 | 0.530948 |
| BFSP2         | 6.18534 | 0.894987 |
| BGLAP         | 5.2343  | 0.958823 |
| BHLHE40       | 5.22032 | 1.0804   |
| BHLHE41       | 6.48984 | 0.845788 |
| BICD1         | 6.20274 | 0.595607 |
| BICD2         | 6.22381 | 0.44182  |

|         |         |          |
|---------|---------|----------|
| BID     | 6.78491 | 0.505135 |
| BIK     | 7.49811 | 1.05571  |
| BIN1    | 5.98067 | 0.527438 |
| BIN2    | 8.41036 | 0.596097 |
| BIRC2   | 8.7095  | 0.953465 |
| BIRC3   | 6.92313 | 1.8033   |
| BIRC5   | 4.87071 | 0.590653 |
| BIRC6   | 7.48687 | 0.565481 |
| BIRC7   | 6.23206 | 0.461013 |
| BLCAP   | 7.33481 | 0.585521 |
| BLK     | 4.82674 | 0.533618 |
| BLM     | 6.59574 | 0.823088 |
| BLMH    | 6.87841 | 0.532562 |
| BLNK    | 8.79295 | 1.18466  |
| BLOC1S1 | 8.00641 | 0.448128 |
| BLOC1S2 | 7.99543 | 0.625105 |
| BLOC1S4 | 6.73324 | 0.514262 |
| BLOC1S5 | 6.6558  | 0.563247 |
| BLOC1S6 | 8.58432 | 0.524051 |
| BLVRA   | 5.27439 | 0.605106 |
| BLVRB   | 7.78958 | 0.708105 |
| BMF     | 6.89532 | 0.714294 |
| BMI1    | 11.4923 | 0.689983 |
| BMP4    | 5.82218 | 0.675302 |
| BMP6    | 6.12983 | 0.433112 |
| BMP8B   | 5.60872 | 0.671909 |
| BMPR2   | 5.91416 | 0.671598 |
| BMS1    | 7.16076 | 0.453001 |
| BMS1P20 | 5.92982 | 0.502325 |
| BMS1P6  | 6.76392 | 0.56058  |
| BNIP2   | 7.53462 | 0.598053 |
| BNIP3   | 5.84035 | 1.59358  |
| BNIP3L  | 7.92318 | 0.862785 |
| BOD1    | 7.51181 | 0.522127 |
| BOD1L1  | 5.92301 | 0.656177 |
| BOLA1   | 6.14759 | 0.652356 |
| BOLA2   | 6.59554 | 0.404202 |
| BOLA2B  | 9.76352 | 0.542828 |
| BOLA3   | 9.38393 | 0.612274 |
| BOP1    | 6.72807 | 0.575048 |
| BORA    | 5.3332  | 0.669066 |
| BPGM    | 5.68401 | 0.778263 |
| BPNT1   | 4.94167 | 0.431432 |
| BPTF    | 5.94382 | 0.404775 |
| BRAF    | 5.84907 | 0.421386 |
| BRAT1   | 5.88769 | 0.467619 |
| BRCA1   | 5.10003 | 0.517153 |



|          |         |          |
|----------|---------|----------|
| BRCC3    | 5.97652 | 0.757807 |
| BRD2     | 8.91775 | 0.57011  |
| BRE-AS1  | 4.97065 | 0.41527  |
| BRI3BP   | 6.23073 | 0.918316 |
| BRIX1    | 6.56342 | 0.606133 |
| BRMS1    | 7.45134 | 0.409055 |
| BRMS1L   | 5.70356 | 0.533869 |
| BROX     | 6.19813 | 0.545544 |
| BRK1     | 5.83412 | 0.556028 |
| BSCL2    | 9.32044 | 0.728761 |
| BSDC1    | 6.90744 | 0.411915 |
| BSG      | 9.22606 | 0.678712 |
| BSPRY    | 4.83038 | 0.677406 |
| BST2     | 9.1981  | 0.656293 |
| BTAF1    | 8.58077 | 0.687196 |
| BTBD1    | 8.71004 | 0.506821 |
| BTBD10   | 6.74239 | 0.566765 |
| BTBD2    | 5.5645  | 0.431075 |
| BTBD3    | 7.41989 | 1.87355  |
| BTBD6    | 7.30424 | 0.584332 |
| BTD      | 6.24596 | 0.483172 |
| BTG1     | 9.71703 | 0.891238 |
| BTG2     | 10.177  | 0.862782 |
| BTG3     | 6.15651 | 0.448764 |
| BTK      | 7.80094 | 0.712274 |
| BTLA     | 7.78415 | 1.76253  |
| BTN2A2   | 5.23536 | 0.543611 |
| BTN3A1   | 8.36419 | 0.587035 |
| BTN3A2   | 9.22997 | 0.813081 |
| BTN3A3   | 8.75909 | 0.816974 |
| BTNL3    | 6.08048 | 0.478392 |
| BUB1B    | 6.09239 | 1.43846  |
| BUB3     | 7.36863 | 0.442429 |
| BUD13    | 6.15692 | 0.61516  |
| BYSL     | 6.82802 | 0.680068 |
| BZRAP1   | 5.09251 | 0.40736  |
| BZW1     | 9.13204 | 0.482201 |
| BZW2     | 9.30589 | 0.771555 |
| C10orf10 | 6.70971 | 1.19097  |
| C10orf2  | 5.88393 | 0.609895 |
| C10orf32 | 7.60287 | 0.675059 |
| C10orf35 | 5.40304 | 0.414539 |
| C10orf54 | 6.67825 | 0.619076 |
| C10orf88 | 5.15829 | 0.460229 |
| C11orf1  | 6.8454  | 0.538069 |
| C11orf24 | 8.10744 | 0.436108 |
| C11orf48 | 8.39657 | 0.518503 |

|           |         |          |
|-----------|---------|----------|
| C11orf54  | 6.04929 | 0.521583 |
| C11orf57  | 5.12796 | 0.470256 |
| C11orf68  | 7.33022 | 0.41696  |
| C11orf71  | 7.26156 | 0.771021 |
| C11orf73  | 8.0893  | 0.522415 |
| C11orf74  | 5.16066 | 1.1623   |
| C11orf80  | 7.04485 | 0.858065 |
| C11orf83  | 6.55482 | 0.544026 |
| C11orf96  | 6.70435 | 2.11985  |
| C12orf10  | 7.03577 | 0.660322 |
| C12orf29  | 6.68798 | 0.679561 |
| C12orf4   | 6.09974 | 0.754452 |
| C12orf43  | 5.83988 | 0.420722 |
| C12orf45  | 8.25259 | 0.785422 |
| C12orf5   | 6.04753 | 0.800992 |
| C12orf57  | 10.4401 | 0.66463  |
| C12orf66  | 5.15102 | 0.641949 |
| C12orf73  | 5.75502 | 0.526337 |
| C12orf75  | 5.1262  | 1.60708  |
| C14orf119 | 8.23979 | 0.704087 |
| C14orf142 | 6.75178 | 0.73036  |
| C14orf166 | 10.6208 | 0.475498 |
| C14orf169 | 6.48087 | 0.638606 |
| C14orf2   | 9.39064 | 0.497224 |
| C14orf28  | 5.45459 | 0.693312 |
| C15orf37  | 4.98535 | 0.507878 |
| C15orf39  | 6.30612 | 0.586704 |
| C15orf57  | 6.11528 | 0.598597 |
| C15orf61  | 9.59181 | 0.52854  |
| C15orf65  | 6.80567 | 0.83032  |
| C16orf52  | 5.44581 | 0.430726 |
| C16orf54  | 7.78501 | 1.35046  |
| C16orf72  | 6.45428 | 0.610823 |
| C16orf74  | 6.14683 | 0.609787 |
| C16orf80  | 7.90901 | 0.746916 |
| C16orf91  | 6.92838 | 0.409112 |
| C16orf93  | 5.06984 | 0.41105  |
| C17orf49  | 9.16864 | 0.564148 |
| C17orf58  | 7.02209 | 0.688076 |
| C17orf62  | 7.11149 | 0.592152 |
| C17orf75  | 5.38063 | 0.619888 |
| C17orf96  | 6.1398  | 0.406279 |
| C19orf10  | 10.3976 | 0.624328 |
| C19orf12  | 6.83149 | 0.435204 |
| C19orf24  | 7.36112 | 0.553138 |
| C19orf43  | 8.11843 | 0.403252 |
| C19orf48  | 7.28158 | 0.619069 |

|               |         |          |
|---------------|---------|----------|
| C19orf52      | 6.66665 | 0.508617 |
| C19orf53      | 10.0018 | 0.488413 |
| C19orf54      | 7.05834 | 0.537179 |
| C19orf60      | 8.13782 | 0.451055 |
| C19orf66      | 6.86921 | 0.455857 |
| C19orf68      | 5.91146 | 0.429746 |
| C19orf70      | 9.37677 | 0.560299 |
| C19orf81      | 4.87131 | 0.413005 |
| C19orf83      | 6.04301 | 0.433195 |
| C1D           | 7.67855 | 0.571846 |
| C1GALT1       | 6.27255 | 0.600925 |
| C1GALT1C1     | 7.28283 | 0.544435 |
| C1orf106      | 6.5128  | 1.3744   |
| C1orf109      | 4.84861 | 0.641891 |
| C1orf122      | 7.95032 | 0.457115 |
| C1orf131      | 6.70038 | 0.89522  |
| C1orf174      | 5.87782 | 0.555995 |
| C1orf186      | 5.56342 | 0.616479 |
| C1orf198      | 5.57547 | 0.578209 |
| C1orf21       | 4.87578 | 0.574239 |
| C1orf216      | 5.81874 | 0.496919 |
| C1orf27       | 6.604   | 0.448365 |
| C1orf43       | 9.16674 | 0.619446 |
| C1orf50       | 6.14745 | 0.429756 |
| C1orf52       | 5.55318 | 0.442532 |
| C1orf53       | 5.23385 | 0.66919  |
| C1orf54       | 5.10763 | 0.604039 |
| C1orf85       | 6.4533  | 0.700329 |
| C1QA          | 5.1596  | 1.05878  |
| C1QBP         | 9.21919 | 0.83275  |
| C1QC          | 5.13515 | 1.10747  |
| C1QTNF3-AMACR | 5.35306 | 0.726348 |
| C1R           | 6.30174 | 1.06787  |
| C2            | 5.27843 | 0.767103 |
| C20orf141     | 5.35522 | 0.402337 |
| C20orf203     | 4.81463 | 0.431706 |
| C20orf24      | 10.386  | 0.410734 |
| C21orf119     | 5.38643 | 0.548854 |
| C21orf15      | 5.72539 | 0.40164  |
| C21orf33      | 7.8418  | 0.560829 |
| C21orf91      | 8.28232 | 0.901514 |
| C22orf39      | 5.8545  | 0.47741  |
| C2CD2         | 6.42942 | 0.793924 |
| C2CD5         | 8.43538 | 0.602663 |
| C2orf42       | 6.27064 | 0.575757 |
| C2orf43       | 6.38927 | 0.491338 |
| C2orf47       | 7.23386 | 0.566237 |

|                |         |          |
|----------------|---------|----------|
| C2orf49        | 5.29403 | 0.409301 |
| C2orf57        | 5.14842 | 0.40769  |
| C2orf68        | 5.05836 | 0.459567 |
| C2orf69        | 8.16215 | 0.54569  |
| C2orf74        | 6.80503 | 0.577647 |
| C2orf76        | 6.61523 | 1.09445  |
| C2orf88        | 7.58047 | 0.922098 |
| C3             | 5.56847 | 0.406665 |
| C3orf17        | 6.58704 | 0.426578 |
| C3orf18        | 6.17173 | 0.402698 |
| C3orf38        | 5.64779 | 0.504528 |
| C3orf70        | 5.2862  | 1.81181  |
| C4A            | 7.12099 | 1.31772  |
| C4B            | 7.12099 | 1.31772  |
| C4B_2          | 7.12099 | 1.31772  |
| C4orf29        | 6.07328 | 0.405673 |
| C4orf3         | 8.63899 | 0.609395 |
| C4orf32        | 5.2247  | 0.585983 |
| C4orf46        | 7.26459 | 0.570647 |
| C4orf48        | 7.44645 | 0.816573 |
| C5orf22        | 5.74005 | 0.444814 |
| C5orf24        | 5.85277 | 0.450582 |
| C5orf28        | 6.33478 | 0.69799  |
| C5orf30        | 7.05332 | 0.845355 |
| C5orf56        | 6.7987  | 0.475512 |
| C6orf1         | 6.16184 | 0.418363 |
| C6orf106       | 6.21069 | 0.415089 |
| C6orf120       | 7.53169 | 0.770049 |
| C6orf136       | 6.32005 | 0.565033 |
| C6orf203       | 6.52983 | 0.677279 |
| C6orf211       | 6.27178 | 1.07513  |
| C6orf226       | 7.07501 | 0.577537 |
| C6orf48        | 10.2412 | 0.848227 |
| C6orf62        | 7.76123 | 0.640432 |
| C7orf31        | 6.32778 | 0.690435 |
| C7orf55        | 7.68248 | 0.68035  |
| C7orf55-LUC7L2 | 7.5465  | 0.521967 |
| C7orf60        | 5.35463 | 0.597866 |
| C8orf33        | 6.44748 | 0.555747 |
| C8orf44-SGK3   | 6.11444 | 0.671584 |
| C8orf59        | 8.45158 | 0.542255 |
| C8orf60        | 6.19028 | 0.664041 |
| C8orf76        | 5.6282  | 0.685037 |
| C8orf82        | 6.32491 | 0.621046 |
| C9orf116       | 5.10189 | 0.433799 |
| C9orf131       | 5.17268 | 0.451846 |
| C9orf142       | 6.72587 | 0.516395 |

|          |         |          |
|----------|---------|----------|
| C9orf172 | 5.7219  | 0.414269 |
| C9orf40  | 5.37955 | 0.471767 |
| C9orf41  | 5.91112 | 0.66663  |
| C9orf64  | 7.38407 | 0.537594 |
| C9orf69  | 6.43648 | 0.476412 |
| C9orf72  | 5.36308 | 0.623607 |
| C9orf78  | 6.77309 | 0.421048 |
| C9orf91  | 6.95721 | 0.75516  |
| CA1      | 4.91149 | 0.570687 |
| CA11     | 5.49905 | 0.568856 |
| CA5BP1   | 5.46407 | 0.403327 |
| CAAP1    | 6.75158 | 0.618158 |
| CAB39    | 7.37737 | 0.561762 |
| CABLES1  | 5.44327 | 0.579942 |
| CABLES2  | 5.92867 | 0.526246 |
| CACYBP   | 7.56963 | 0.574226 |
| CADM1    | 6.4789  | 1.47723  |
| CADPS2   | 8.54253 | 1.14018  |
| CALCOCO1 | 7.62013 | 0.418301 |
| CALM2    | 8.35078 | 0.410513 |
| CALM3    | 8.35078 | 0.410513 |
| CALML4   | 5.33903 | 0.695043 |
| CALR     | 8.59552 | 0.632189 |
| CALU     | 8.27446 | 0.526964 |
| CAMK1D   | 6.57205 | 0.63555  |
| CAMK2D   | 6.46437 | 0.874169 |
| CAMLG    | 9.04329 | 0.640812 |
| CAMP     | 6.84186 | 1.12205  |
| CAMSAP2  | 5.80331 | 0.762118 |
| CAND1    | 5.83303 | 0.418745 |
| CAP1     | 9.49753 | 0.653105 |
| CAPG     | 6.26559 | 0.784996 |
| CAPN12   | 6.27585 | 0.553358 |
| CAPN2    | 8.27521 | 0.639198 |
| CAPN3    | 5.79292 | 0.61011  |
| CAPN5    | 4.9032  | 0.407554 |
| CAPN7    | 7.63955 | 0.51369  |
| CAPNS1   | 9.16074 | 0.512072 |
| CAPRIN1  | 6.90119 | 0.482904 |
| CAPZA2   | 7.08108 | 0.479093 |
| CARD16   | 5.78424 | 0.6597   |
| CARKD    | 6.4177  | 0.703803 |
| CARM1    | 6.53336 | 0.582457 |
| CARNS1   | 5.08528 | 0.41032  |
| CASC14   | 5.36703 | 0.423693 |
| CASC3    | 7.22201 | 0.452167 |
| CASP1    | 7.82416 | 1.13104  |

|           |         |          |
|-----------|---------|----------|
| CASP10    | 6.46791 | 0.414419 |
| CASP3     | 8.39408 | 0.6958   |
| CASP4     | 6.63756 | 0.759815 |
| CASP6     | 6.0104  | 0.527728 |
| CASP7     | 6.82038 | 0.60955  |
| CASP8     | 6.0676  | 0.41041  |
| CAST      | 7.01707 | 0.439866 |
| CAT       | 6.75076 | 0.574267 |
| CATIP-AS1 | 5.03141 | 0.490483 |
| CAV1      | 8.61711 | 1.22221  |
| CAV2      | 5.5656  | 0.818981 |
| CBFA2T2   | 5.85283 | 0.409157 |
| CBFA2T3   | 6.37514 | 0.654708 |
| CBFB      | 7.40018 | 0.564214 |
| CBL       | 5.86664 | 0.484113 |
| CBLL1     | 5.58911 | 0.592708 |
| CBLN3     | 4.83816 | 0.498432 |
| CBR1      | 6.52051 | 0.817885 |
| CBR4      | 6.46066 | 0.548043 |
| CBS       | 6.45116 | 0.860521 |
| CBWD1     | 8.92557 | 0.638545 |
| CBWD2     | 8.92557 | 0.638545 |
| CBWD3     | 8.92557 | 0.638545 |
| CBWD5     | 8.92557 | 0.638545 |
| CBWD6     | 8.92557 | 0.638545 |
| CBWD7     | 8.92557 | 0.638545 |
| CBX1      | 7.1314  | 0.758294 |
| CBX3      | 7.64279 | 0.574007 |
| CBX4      | 8.20871 | 0.588237 |
| CBX5      | 5.72329 | 0.520737 |
| CBX6      | 7.4715  | 0.476882 |
| CBX7      | 8.08286 | 0.88206  |
| CCAR1     | 7.21056 | 0.555382 |
| CCBL2     | 7.33453 | 0.73808  |
| CCDC102A  | 5.31372 | 0.448245 |
| CCDC104   | 6.03999 | 0.836956 |
| CCDC105   | 5.27349 | 0.408636 |
| CCDC107   | 7.05977 | 0.424903 |
| CCDC109B  | 7.35421 | 0.739305 |
| CCDC110   | 5.39403 | 1.00525  |
| CCDC115   | 6.70434 | 0.632765 |
| CCDC117   | 6.96495 | 0.693364 |
| CCDC12    | 7.68488 | 0.431426 |
| CCDC125   | 5.0762  | 0.521529 |
| CCDC126   | 6.48283 | 0.607334 |
| CCDC134   | 5.85894 | 0.438109 |
| CCDC137   | 5.74911 | 0.465187 |

|           |         |          |
|-----------|---------|----------|
| CCDC144B  | 6.32497 | 1.74973  |
| CCDC144CP | 4.83189 | 0.892837 |
| CCDC151   | 5.57917 | 0.671696 |
| CCDC167   | 7.87092 | 0.676893 |
| CCDC186   | 6.12527 | 0.736562 |
| CCDC23    | 6.15458 | 0.480993 |
| CCDC25    | 6.90564 | 0.405329 |
| CCDC28A   | 7.77064 | 0.69818  |
| CCDC43    | 6.43163 | 0.644431 |
| CCDC47    | 8.49551 | 0.490517 |
| CCDC50    | 6.68267 | 0.780181 |
| CCDC51    | 6.71408 | 0.613684 |
| CCDC53    | 8.50862 | 0.622352 |
| CCDC58    | 6.33773 | 0.969132 |
| CCDC59    | 8.75942 | 0.488135 |
| CCDC6     | 7.21708 | 0.982327 |
| CCDC69    | 7.40668 | 0.81976  |
| CCDC71L   | 5.76982 | 0.439473 |
| CCDC84    | 6.98197 | 0.622134 |
| CCDC85A   | 5.29632 | 0.933476 |
| CCDC86    | 6.60022 | 0.79448  |
| CCDC88A   | 5.47879 | 0.81118  |
| CCDC88C   | 6.85792 | 0.647267 |
| CCDC91    | 6.89001 | 0.6339   |
| CCDC92    | 5.66738 | 0.529633 |
| CCL21     | 5.29217 | 0.422918 |
| CCL3      | 8.41626 | 2.59876  |
| CCL3L1    | 8.41626 | 2.59876  |
| CCL3L3    | 8.41626 | 2.59876  |
| CCL4      | 6.93672 | 1.80043  |
| CCL5      | 5.66536 | 0.977366 |
| CCM2      | 8.06775 | 0.513328 |
| CCNB1IP1  | 8.4053  | 0.860063 |
| CCNB2     | 4.86542 | 0.467309 |
| CCNC      | 7.47802 | 0.534066 |
| CCND1     | 6.61684 | 2.50469  |
| CCND2     | 5.66767 | 2.07575  |
| CCND3     | 6.67651 | 0.686886 |
| CCNDBP1   | 9.26909 | 0.522172 |
| CCNE1     | 5.52288 | 0.406395 |
| CCNE2     | 5.44409 | 1.22066  |
| CCNG1     | 9.89381 | 0.858847 |
| CCNG2     | 5.833   | 0.594296 |
| CCNH      | 8.43477 | 0.508828 |
| CCNI      | 8.80287 | 0.426936 |
| CCNL1     | 9.5874  | 0.705219 |
| CCNT1     | 7.23925 | 0.491902 |

|         |         |          |
|---------|---------|----------|
| CCNT2   | 5.45908 | 0.414239 |
| CCNYL1  | 5.67847 | 0.627888 |
| CCP110  | 5.02095 | 0.44094  |
| CCPG1   | 9.00109 | 0.720334 |
| CCR1    | 6.14127 | 1.64836  |
| CCR10   | 6.9045  | 1.72354  |
| CCR2    | 8.51237 | 1.82907  |
| CCR5    | 5.68849 | 1.23535  |
| CCRL2   | 5.62823 | 1.04357  |
| CCSAP   | 5.11565 | 0.838584 |
| CCT2    | 9.59579 | 0.763913 |
| CCT3    | 9.68135 | 0.786487 |
| CCT5    | 7.03129 | 0.558818 |
| CCT6A   | 7.90833 | 0.865302 |
| CCT6B   | 5.43335 | 0.519755 |
| CCT6P1  | 6.71886 | 0.438478 |
| CCT6P3  | 6.71886 | 0.438478 |
| CCT8    | 7.62764 | 0.504259 |
| CCZ1B   | 7.69691 | 0.457204 |
| CD14    | 5.13231 | 0.879003 |
| CD151   | 7.17079 | 0.418077 |
| CD163L1 | 5.24715 | 0.904242 |
| CD164   | 9.85951 | 0.562006 |
| CD177   | 5.2403  | 0.592308 |
| CD180   | 8.6055  | 1.29402  |
| CD1D    | 7.12715 | 1.83292  |
| CD200   | 7.7065  | 1.97204  |
| CD27    | 7.27754 | 1.85015  |
| CD274   | 5.42607 | 0.671515 |
| CD300A  | 5.63991 | 0.801868 |
| CD302   | 6.05847 | 1.06541  |
| CD320   | 7.61738 | 0.675712 |
| CD33    | 5.05221 | 1.00247  |
| CD37    | 5.80365 | 0.629754 |
| CD38    | 10.7495 | 0.748618 |
| CD3E    | 5.25208 | 0.523954 |
| CD3EAP  | 6.07016 | 0.655278 |
| CD40    | 6.78741 | 0.611743 |
| CD44    | 5.98365 | 1.39886  |
| CD46    | 9.75704 | 0.820185 |
| CD48    | 8.8771  | 0.94041  |
| CD52    | 5.71837 | 1.56338  |
| CD53    | 7.43724 | 0.441173 |
| CD55    | 8.39824 | 0.845423 |
| CD59    | 8.49628 | 0.684472 |
| CD5L    | 5.85292 | 0.699251 |
| CD63    | 11.4853 | 0.715181 |



|           |         |          |
|-----------|---------|----------|
| CD69      | 5.05477 | 2.27824  |
| CD74      | 7.53803 | 0.871911 |
| CD79A     | 7.67381 | 1.55873  |
| CD81      | 6.00178 | 1.58568  |
| CD83      | 6.44298 | 0.773062 |
| CD86      | 5.52451 | 0.963574 |
| CD9       | 5.26753 | 0.894601 |
| CD97      | 7.52977 | 0.907034 |
| CD99      | 6.13522 | 1.55387  |
| CDC123    | 7.61794 | 0.600175 |
| CDC16     | 8.12107 | 0.658578 |
| CDC20     | 5.21591 | 0.906031 |
| CDC23     | 5.46113 | 0.740436 |
| CDC25A    | 4.86089 | 0.481663 |
| CDC25B    | 6.99881 | 0.713874 |
| CDC26     | 8.57766 | 0.521025 |
| CDC27     | 6.77417 | 0.491008 |
| CDC37L1   | 5.14239 | 0.522402 |
| CDC40     | 5.82747 | 0.590358 |
| CDC42     | 7.46656 | 0.526306 |
| CDC42-IT1 | 6.11661 | 0.975217 |
| CDC42EP3  | 6.26926 | 0.683061 |
| CDC42SE1  | 7.15371 | 0.578801 |
| CDC42SE2  | 8.85096 | 0.749815 |
| CDC45     | 5.31013 | 0.639958 |
| CDC73     | 6.70914 | 0.682744 |
| CDCA3     | 5.39212 | 0.636488 |
| CDCA4     | 6.0218  | 0.517507 |
| CDCA5     | 6.2691  | 0.819606 |
| CDCA7L    | 7.17869 | 0.899623 |
| CDCA8     | 5.93188 | 0.627461 |
| CDH2      | 5.07994 | 1.0142   |
| CDIP1     | 6.11527 | 0.446829 |
| CDIPT     | 9.08854 | 0.477403 |
| CDK1      | 5.1265  | 1.0655   |
| CDK14     | 6.61506 | 0.477116 |
| CDK17     | 7.17442 | 0.589074 |
| CDK18     | 5.65892 | 0.516905 |
| CDK2      | 5.01438 | 0.401588 |
| CDK2AP1   | 7.44727 | 0.959436 |
| CDK2AP2   | 8.60157 | 0.723924 |
| CDK4      | 8.77658 | 0.476707 |
| CDK5      | 6.90011 | 0.54106  |
| CDK5RAP3  | 9.89061 | 0.439785 |
| CDK6      | 5.66682 | 0.858562 |
| CDK7      | 7.00213 | 0.702256 |
| CDK8      | 5.20224 | 0.536312 |

|          |         |          |
|----------|---------|----------|
| CDKN1A   | 9.3159  | 0.911482 |
| CDKN1B   | 9.68295 | 0.895101 |
| CDKN1C   | 5.48965 | 0.843265 |
| CDKN2A   | 6.01784 | 0.420978 |
| CDKN2AIP | 7.17507 | 0.677982 |
| CDKN2C   | 6.11082 | 1.1992   |
| CDKN3    | 6.04942 | 1.22101  |
| CDR2     | 7.91905 | 0.577176 |
| CDRT15   | 4.94058 | 0.427158 |
| CDRT4    | 5.81023 | 0.723584 |
| CDT1     | 5.16839 | 0.494644 |
| CDV3     | 10.5054 | 0.564167 |
| CDX1     | 6.47608 | 0.446197 |
| CDYL     | 6.72459 | 0.612209 |
| CEACAM1  | 5.58264 | 0.643    |
| CEACAM21 | 5.76654 | 0.57209  |
| CEBPA    | 4.84067 | 0.413374 |
| CEBPB    | 9.60987 | 0.864884 |
| CEBPE    | 5.51801 | 0.419791 |
| CEBPG    | 6.99383 | 0.626708 |
| CEBPZ    | 7.74255 | 0.500236 |
| CEBPZOS  | 5.64169 | 0.420189 |
| CECR1    | 9.87639 | 1.2919   |
| CECR5    | 7.25919 | 0.596746 |
| CELF2    | 6.53406 | 0.736405 |
| CELP     | 4.87889 | 0.441511 |
| CELSR3   | 5.35473 | 0.651122 |
| CENPA    | 5.14026 | 0.711314 |
| CENPB    | 5.82117 | 0.4342   |
| CENPC    | 5.54016 | 0.649042 |
| CENPE    | 4.91887 | 0.948478 |
| CENPH    | 5.88372 | 0.946231 |
| CENPJ    | 4.98296 | 0.604839 |
| CENPM    | 5.98756 | 0.655995 |
| CENPU    | 5.59931 | 0.677615 |
| CENPW    | 6.54596 | 1.14098  |
| CEP120   | 6.60802 | 0.570795 |
| CEP128   | 5.30093 | 0.844906 |
| CEP170   | 6.30818 | 0.657134 |
| CEP170B  | 6.67722 | 0.44741  |
| CEP170P1 | 6.30818 | 0.657134 |
| CEP192   | 6.32835 | 0.580435 |
| CEP290   | 5.00973 | 0.41701  |
| CEP350   | 8.28597 | 0.574289 |
| CEP57    | 7.29814 | 0.793145 |
| CEP68    | 5.44088 | 0.509616 |
| CEP70    | 5.21423 | 0.532973 |

|               |         |          |
|---------------|---------|----------|
| CEP72         | 4.98119 | 0.488607 |
| CEP76         | 5.08656 | 0.729661 |
| CEP78         | 5.74537 | 0.548556 |
| CEP85L        | 5.60105 | 0.544365 |
| CEP95         | 5.65976 | 0.427391 |
| CEP97         | 5.10425 | 0.645472 |
| CEPT1         | 5.4832  | 0.517842 |
| CERCAM        | 6.19849 | 0.476456 |
| CERK          | 8.41125 | 0.69225  |
| CERS2         | 8.81669 | 0.54998  |
| CES4A         | 6.02213 | 0.415687 |
| CETN2         | 8.19919 | 0.863946 |
| CETN3         | 7.92655 | 0.974286 |
| CFB           | 4.90362 | 0.492095 |
| CFD           | 5.88552 | 0.826408 |
| CFL2          | 7.03878 | 0.820421 |
| CFLAR         | 7.82586 | 0.612219 |
| CGGBP1        | 8.44759 | 0.425077 |
| CGREF1        | 5.06006 | 0.763349 |
| CGRRF1        | 6.26892 | 0.549774 |
| CH17-132F21.1 | 9.55253 | 1.98032  |
| CHAC1         | 6.44713 | 1.07873  |
| CHAC2         | 8.13713 | 1.12761  |
| CHAMP1        | 6.7274  | 0.835948 |
| CHCHD1        | 8.58827 | 0.550549 |
| CHCHD10       | 9.42378 | 0.707215 |
| CHCHD2        | 11.2005 | 0.52269  |
| CHCHD3        | 5.89031 | 0.40722  |
| CHCHD4        | 7.49692 | 0.565044 |
| CHCHD6        | 6.01119 | 0.426155 |
| CHCHD7        | 7.84135 | 0.569675 |
| CHD1          | 7.681   | 0.64277  |
| CHD1L         | 6.37145 | 0.603626 |
| CHD2          | 6.58594 | 0.51038  |
| CHD7          | 6.43129 | 0.530984 |
| CHD8          | 6.64103 | 0.488338 |
| CHD9          | 6.04015 | 0.597936 |
| CHEK1         | 5.45718 | 0.776643 |
| CHEK2         | 5.90813 | 0.649625 |
| CHFR          | 5.87104 | 0.546299 |
| CHIC2         | 6.67319 | 0.698647 |
| CHID1         | 8.65359 | 0.535339 |
| CHKA          | 5.98257 | 0.410241 |
| CHKB          | 7.88772 | 0.428083 |
| CHKB-CPT1B    | 5.38067 | 0.636478 |
| CHMP1B        | 7.04237 | 0.437619 |
| CHMP2B        | 7.62137 | 0.484812 |

|            |         |          |
|------------|---------|----------|
| CHMP3      | 7.75013 | 0.519004 |
| CHMP4A     | 7.85141 | 0.516489 |
| CHMP4B     | 8.00323 | 0.661428 |
| CHMP4C     | 5.36471 | 0.876462 |
| CHMP5      | 8.96365 | 0.881375 |
| CHMP7      | 6.29185 | 0.480022 |
| CHN1       | 5.07744 | 0.429939 |
| CHODL      | 5.26543 | 0.579827 |
| CHORDC1    | 5.47844 | 0.479049 |
| CHP1       | 8.4421  | 0.559562 |
| CHPF       | 7.62699 | 0.50629  |
| CHPF2      | 7.91079 | 0.448817 |
| CHRAC1     | 6.48897 | 0.469409 |
| CHRN1      | 5.50799 | 0.43551  |
| CHRNA      | 5.62803 | 0.408559 |
| CHST11     | 7.03798 | 0.748047 |
| CHST12     | 8.1618  | 0.508777 |
| CHST14     | 6.59325 | 0.471041 |
| CHST15     | 7.6367  | 0.466093 |
| CHST2      | 5.34219 | 0.836646 |
| CHST7      | 4.97044 | 0.708447 |
| CHST8      | 5.49834 | 0.417894 |
| CHSY1      | 8.68856 | 0.8022   |
| CHSY3      | 6.12334 | 1.49719  |
| CHTF18     | 5.85187 | 0.457766 |
| CHTOP      | 7.68771 | 0.45153  |
| CHUK       | 6.45294 | 0.682034 |
| CHURC1     | 7.37219 | 0.699491 |
| CIAPIN1    | 5.54757 | 0.400214 |
| CIB1       | 8.07723 | 0.637352 |
| CIDEB      | 6.61563 | 0.56468  |
| CIPC       | 5.54153 | 0.793784 |
| CIRBP      | 7.95585 | 0.445623 |
| CIRH1A     | 7.12369 | 0.424922 |
| CISD1      | 7.45203 | 0.699363 |
| CISH       | 6.30803 | 0.7297   |
| CITED2     | 8.84771 | 0.730379 |
| CKAP2      | 6.4524  | 0.6445   |
| CKAP4      | 7.97694 | 0.442141 |
| CKAP5      | 6.87941 | 0.609809 |
| CKB        | 6.14069 | 0.722339 |
| CKLF       | 7.87597 | 0.834421 |
| CKLF-CMTM1 | 8.81642 | 0.92933  |
| CKMT2-AS1  | 5.71463 | 0.524239 |
| CKS1B      | 7.81785 | 1.10388  |
| CKS2       | 8.74284 | 1.38056  |
| CLASP2     | 5.87615 | 0.467316 |

|         |         |          |
|---------|---------|----------|
| CLC     | 5.80506 | 1.6596   |
| CLCC1   | 7.13114 | 0.624113 |
| CLCN3   | 6.9588  | 0.596062 |
| CLDN7   | 4.89041 | 0.50655  |
| CLDND1  | 6.19059 | 0.405986 |
| CLEC2B  | 5.24399 | 1.46459  |
| CLEC2L  | 4.81875 | 0.411291 |
| CLECL1  | 5.69034 | 0.807604 |
| CLIC1   | 10.8593 | 0.568051 |
| CLIC2   | 7.57217 | 1.79798  |
| CLIC4   | 8.7951  | 0.705963 |
| CLINT1  | 9.0136  | 0.635595 |
| CLK1    | 9.26651 | 0.637612 |
| CLK2    | 7.9292  | 0.583194 |
| CLK4    | 6.37366 | 0.63052  |
| CLMN    | 5.60317 | 0.673067 |
| CLN3    | 6.97064 | 0.535837 |
| CLN5    | 6.70098 | 0.744922 |
| CLNS1A  | 7.76681 | 0.522466 |
| CLOCK   | 6.49891 | 0.45038  |
| CLPP    | 8.32845 | 0.446424 |
| CLPTM1  | 8.02265 | 0.479234 |
| CLPX    | 6.98746 | 0.697608 |
| CLSTN1  | 7.83905 | 0.45097  |
| CMAHP   | 6.12848 | 0.727751 |
| CMC1    | 7.54356 | 0.861951 |
| CMC2    | 8.6575  | 0.536033 |
| CMC4    | 6.43135 | 0.549809 |
| CMPK2   | 7.49782 | 1.93894  |
| CMSS1   | 8.22079 | 0.733799 |
| CMTM7   | 6.14665 | 0.656389 |
| CMTR1   | 7.08042 | 0.478941 |
| CMTR2   | 6.50581 | 0.850735 |
| CNEP1R1 | 6.83056 | 0.710283 |
| CNIH1   | 8.42916 | 0.702752 |
| CNKS1R1 | 5.38792 | 0.667909 |
| CNN2    | 7.50858 | 0.421739 |
| CNNM3   | 6.66077 | 0.540978 |
| CNOT10  | 6.5581  | 0.50216  |
| CNOT11  | 7.94383 | 0.405933 |
| CNOT6   | 6.5049  | 0.596798 |
| CNOT6L  | 5.61821 | 0.401247 |
| CNOT7   | 7.43084 | 0.611874 |
| CNOT8   | 7.08837 | 0.464473 |
| CNPPD1  | 6.69569 | 0.45475  |
| CNPY3   | 6.73555 | 0.48411  |
| CNST    | 5.77475 | 0.487907 |

|             |         |          |
|-------------|---------|----------|
| CNTD2       | 7.61173 | 0.455856 |
| CNTN1       | 4.95581 | 1.11739  |
| CNTNAP1     | 5.99982 | 0.478163 |
| CNTRL       | 6.35727 | 0.555271 |
| COA4        | 8.80971 | 0.55347  |
| COA5        | 7.13459 | 0.453082 |
| COA6        | 7.24705 | 0.83635  |
| COA7        | 6.20497 | 0.524523 |
| COASY       | 7.45989 | 0.444938 |
| COBLL1      | 5.66609 | 0.949245 |
| COCH        | 6.33045 | 1.12789  |
| COG2        | 5.94356 | 0.401646 |
| COG3        | 5.59874 | 0.570595 |
| COG5        | 6.52052 | 0.51802  |
| COG7        | 6.52049 | 0.451342 |
| COIL        | 6.71054 | 0.534059 |
| COL13A1     | 5.12429 | 0.453679 |
| COL24A1     | 4.95951 | 1.10087  |
| COL4A3BP    | 7.33317 | 0.475636 |
| COL4A4      | 5.40952 | 0.536032 |
| COL4A5      | 5.03131 | 0.912885 |
| COL9A2      | 5.3988  | 0.443239 |
| COL9A3      | 5.77618 | 0.924947 |
| COLCA2      | 5.58115 | 1.37439  |
| COLGALT1    | 5.87778 | 0.416122 |
| COMMD1      | 8.82067 | 0.551848 |
| COMMD10     | 6.25793 | 0.409507 |
| COMMD2      | 5.56999 | 0.569152 |
| COMMD3      | 11.5276 | 0.813518 |
| COMMD3-BMI1 | 11.4923 | 0.689983 |
| COMMD8      | 7.95815 | 0.776295 |
| COMMD9      | 7.12474 | 0.524156 |
| COMTD1      | 6.8701  | 0.526034 |
| COPA        | 6.22605 | 0.445537 |
| COPG1       | 8.59504 | 0.6312   |
| COPRS       | 8.0619  | 0.50863  |
| COPS2       | 7.79909 | 0.611239 |
| COPS3       | 7.92076 | 0.518546 |
| COPS5       | 8.63171 | 0.588351 |
| COPS6       | 8.22948 | 0.466196 |
| COPS7A      | 6.82911 | 0.527055 |
| COPZ2       | 5.86241 | 0.55856  |
| COQ10A      | 6.91328 | 0.509854 |
| COQ2        | 5.03342 | 0.481373 |
| COQ3        | 6.4323  | 0.636348 |
| COQ4        | 7.23761 | 0.45515  |
| COQ5        | 7.36802 | 0.637482 |

|          |         |          |
|----------|---------|----------|
| CORO1A   | 8.74273 | 1.11613  |
| CORO1C   | 8.12615 | 0.877702 |
| CORO7    | 5.53105 | 0.458598 |
| CORT     | 5.03193 | 0.415174 |
| COX14    | 8.19946 | 0.488039 |
| COX15    | 6.25622 | 0.42942  |
| COX16    | 7.14873 | 0.587179 |
| COX17    | 6.62302 | 0.456947 |
| COX20    | 7.69485 | 0.554117 |
| COX3     | 7.94594 | 0.674098 |
| COX5A    | 8.55578 | 0.471556 |
| COX6B1   | 10.8371 | 0.487469 |
| COX6C    | 11.2053 | 0.477644 |
| COX7A2   | 11.5337 | 0.605021 |
| COX7A2L  | 9.45666 | 0.488522 |
| COX7A2P2 | 8.81101 | 0.441916 |
| COX7B    | 7.34487 | 0.426252 |
| COX7BP1  | 8.40262 | 0.455628 |
| COX7C    | 11.1832 | 0.421809 |
| COX8A    | 10.1405 | 0.469603 |
| CPD      | 5.67691 | 0.616547 |
| CPEB2    | 5.8207  | 0.542884 |
| CPEB4    | 8.85902 | 0.839786 |
| CPED1    | 5.54426 | 0.835078 |
| CPNE1    | 7.80496 | 0.483085 |
| CPNE3    | 8.57797 | 0.756433 |
| CPNE5    | 9.45207 | 1.04188  |
| CPNE7    | 6.41465 | 0.441178 |
| CPOX     | 6.58609 | 0.672981 |
| CPQ      | 6.73947 | 1.08629  |
| CPSF2    | 6.57556 | 0.591416 |
| CPSF3    | 7.85796 | 0.636214 |
| CPSF6    | 6.826   | 0.539249 |
| CPT1A    | 5.55631 | 0.435262 |
| CPT1B    | 5.38067 | 0.636478 |
| CPT2     | 6.12825 | 0.491013 |
| CPTP     | 6.93891 | 0.438659 |
| CPVL     | 5.44874 | 2.04941  |
| CR936796 | 5.92421 | 1.68129  |
| CRADD    | 6.78626 | 0.427458 |
| CRB3     | 6.97435 | 0.41282  |
| CRBN     | 8.67698 | 0.558452 |
| CREB1    | 6.43525 | 0.470234 |
| CREB3    | 8.09197 | 0.408305 |
| CREB3L2  | 7.77489 | 0.481126 |
| CREB3L4  | 6.24746 | 0.620383 |
| CREBL2   | 8.13067 | 0.573061 |

|            |         |          |
|------------|---------|----------|
| CREBRF     | 7.15779 | 0.803023 |
| CREBZF     | 6.5917  | 0.520478 |
| CREG1      | 8.93377 | 0.840048 |
| CRELD1     | 6.30872 | 0.454703 |
| CRELD2     | 10.601  | 0.761127 |
| CRIP1      | 5.95122 | 2.01249  |
| CRIP2      | 4.98167 | 0.417226 |
| CRIPAK     | 6.83428 | 0.508489 |
| CRIPT      | 7.3636  | 0.500822 |
| CRK        | 7.27876 | 0.481297 |
| CRKL       | 6.00753 | 0.477549 |
| CRLF1      | 5.29579 | 0.409082 |
| CRLF3      | 7.86812 | 0.653368 |
| CRNDE      | 6.51791 | 1.76066  |
| CRNKL1     | 6.46604 | 1.01098  |
| CRTAP      | 7.53413 | 0.495427 |
| CRTC3      | 5.62199 | 0.592812 |
| CRY1       | 6.12909 | 1.01717  |
| CRYBB1     | 5.25223 | 0.556302 |
| CRYBB2     | 5.52405 | 0.424872 |
| CRYBG3     | 7.34729 | 0.868949 |
| CRYL1      | 6.34819 | 0.63348  |
| CRYM       | 5.79696 | 0.467968 |
| CRYZ       | 7.1429  | 1.12079  |
| CRYZL1     | 5.93759 | 0.458875 |
| CS         | 9.04619 | 0.446714 |
| CSAG2      | 5.13363 | 0.778547 |
| CSAG3      | 5.13363 | 0.778547 |
| CSDE1      | 10.0367 | 0.63594  |
| CSE1L      | 6.92247 | 0.606419 |
| CSF2RB     | 8.30917 | 1.9121   |
| CSF3R      | 5.15613 | 0.577491 |
| CSGALNACT1 | 6.62367 | 1.08233  |
| CSGALNACT2 | 6.54321 | 0.560554 |
| CSK        | 8.16024 | 0.603906 |
| CSNK1A1    | 6.86526 | 0.422856 |
| CSNK1G3    | 7.20516 | 0.663269 |
| CSNK2A1    | 6.88795 | 0.402124 |
| CSNK2A2    | 6.59393 | 0.459153 |
| CSPP1      | 5.78907 | 0.450528 |
| CSRNP1     | 8.07643 | 0.833546 |
| CSRP1      | 8.97906 | 0.502896 |
| CST3       | 5.25548 | 0.716511 |
| CSTA       | 5.18388 | 1.29038  |
| CSTF1      | 5.86154 | 0.514947 |
| CSTF2      | 5.15252 | 0.49681  |
| CSTF2T     | 6.46097 | 0.741273 |



|               |         |          |
|---------------|---------|----------|
| CSTF3         | 6.48859 | 0.622851 |
| CTA-250D10.23 | 5.84306 | 0.87376  |
| CTA-292E10.6  | 6.88097 | 1.43373  |
| CTA-29F11.1   | 7.42458 | 0.842596 |
| CTA-445C9.15  | 4.95886 | 0.51874  |
| CTAGE15       | 7.26242 | 0.424784 |
| CTB-12A17.3   | 5.93255 | 0.553751 |
| CTB-31O20.2   | 6.5852  | 0.767697 |
| CTB-50L17.7   | 5.71649 | 0.474415 |
| CTBS          | 7.463   | 0.672647 |
| CTC-265F19.1  | 5.65388 | 0.67572  |
| CTC-338M12.4  | 5.18418 | 0.455792 |
| CTC-425F1.4   | 8.44144 | 0.453516 |
| CTC-428G20.3  | 6.09674 | 0.53523  |
| CTC-429P9.3   | 6.60552 | 0.43879  |
| CTC-444N24.11 | 6.54257 | 0.726882 |
| CTC-459F4.3   | 6.48513 | 0.482175 |
| CTCF          | 8.10324 | 0.479847 |
| CTD-2314B22.3 | 6.10777 | 2.2316   |
| CTD-2553C6.1  | 5.72972 | 0.495604 |
| CTD-3092A11.2 | 5.43621 | 1.00573  |
| CTD-3126B10.1 | 5.54117 | 0.416754 |
| CTD-3222D19.5 | 6.06447 | 0.748345 |
| CTDNEP1       | 8.16317 | 0.42226  |
| CTDSP1        | 6.98591 | 0.427078 |
| CTDSP2        | 7.7155  | 0.425974 |
| CTDSPL2       | 6.09893 | 0.661074 |
| CTF1          | 5.3257  | 0.40822  |
| CTGF          | 6.20584 | 2.09031  |
| CTH           | 5.832   | 1.01204  |
| CTHRC1        | 7.77256 | 2.73125  |
| CTNNA2        | 5.12631 | 1.357    |
| CTNNAL1       | 6.17453 | 1.01172  |
| CTNNB1        | 6.33109 | 0.447173 |
| CTNS          | 5.45679 | 0.473193 |
| CTPS1         | 5.93528 | 0.886352 |
| CTR9          | 7.93347 | 0.852389 |
| CTSA          | 8.28399 | 0.667374 |
| CTSB          | 7.09988 | 0.76358  |
| CTSC          | 6.84739 | 0.718393 |
| CTSD          | 6.87817 | 0.46456  |
| CTSF          | 7.62646 | 0.76757  |
| CTSG          | 6.09317 | 0.966785 |
| CTSH          | 5.75533 | 1.56867  |
| CTSK          | 5.14852 | 0.540484 |
| CTSL          | 6.02695 | 0.727469 |
| CTSO          | 8.7113  | 0.869385 |

|          |         |          |
|----------|---------|----------|
| CTSS     | 9.36416 | 0.715557 |
| CTSW     | 6.10502 | 1.27091  |
| CTSZ     | 6.85562 | 0.417036 |
| CUL2     | 5.72454 | 0.486609 |
| CUL4B    | 6.85452 | 0.73812  |
| CUL5     | 6.35576 | 0.498768 |
| CUTA     | 11.1498 | 0.514545 |
| CUTC     | 6.52676 | 0.64702  |
| CUX1     | 6.75561 | 0.528371 |
| CWC15    | 9.05321 | 0.501554 |
| CWC22    | 6.52677 | 0.538973 |
| CWC27    | 6.98482 | 0.560087 |
| CXCL12   | 5.57354 | 1.5299   |
| CXCL16   | 5.20989 | 0.436985 |
| CXCL8    | 6.27289 | 1.96705  |
| CXCR4    | 10.2752 | 1.6264   |
| CXorf21  | 6.59347 | 0.649721 |
| CXorf38  | 5.22944 | 0.462255 |
| CXorf40A | 7.6183  | 0.553062 |
| CXorf40B | 7.62756 | 0.547286 |
| CXXC1    | 8.36031 | 0.505982 |
| CXXC4    | 6.28284 | 0.809585 |
| CXXC5    | 9.53706 | 0.713728 |
| CYAT1    | 6.95597 | 0.508545 |
| CYB561   | 6.47073 | 0.409023 |
| CYB561A3 | 7.09014 | 0.481824 |
| CYB5A    | 6.13424 | 0.688441 |
| CYB5B    | 4.98049 | 0.408297 |
| CYB5D1   | 6.29206 | 0.609646 |
| CYB5D2   | 7.23711 | 0.542162 |
| CYB5R3   | 7.6844  | 0.449463 |
| CYB5R4   | 5.5182  | 0.498911 |
| CYBA     | 9.17936 | 0.420701 |
| CYBB     | 5.23631 | 0.876022 |
| CYC1     | 8.99624 | 0.553984 |
| CYCS     | 8.26782 | 0.650151 |
| CYFIP1   | 8.11148 | 0.771609 |
| CYFIP2   | 5.95935 | 1.03027  |
| CYLD     | 6.13638 | 0.683757 |
| CYP11B2  | 5.54461 | 0.508062 |
| CYP20A1  | 7.50609 | 0.675674 |
| CYP27B1  | 5.37941 | 0.734543 |
| CYP2E1   | 5.27572 | 0.443793 |
| CYP2J2   | 5.91815 | 1.15128  |
| CYP2R1   | 6.04632 | 0.495435 |
| CYP2W1   | 5.73354 | 0.470021 |
| CYP51A1  | 8.29223 | 0.674306 |

|           |         |          |
|-----------|---------|----------|
| CYSLTR1   | 6.97116 | 0.738813 |
| CYSTM1    | 8.35838 | 0.671811 |
| CYTH1     | 7.00242 | 0.580536 |
| CYTH4     | 6.55371 | 0.505001 |
| CYTIP     | 10.2984 | 0.601324 |
| DAAM1     | 5.39237 | 0.64509  |
| DAAM2     | 4.83509 | 0.443344 |
| DAD1      | 10.2827 | 0.546881 |
| DALRD3    | 6.38345 | 0.401467 |
| DANCR     | 10.5561 | 0.664532 |
| DAP       | 8.72428 | 0.522654 |
| DAPK1     | 6.37064 | 1.181    |
| DAPK1-IT1 | 5.6852  | 1.04359  |
| DAPP1     | 6.59797 | 0.603166 |
| DARS      | 8.49736 | 0.540672 |
| DARS2     | 6.06346 | 0.622618 |
| DBF4      | 8.28953 | 0.69016  |
| DBH-AS1   | 5.23021 | 0.447153 |
| DBI       | 10.0817 | 0.596646 |
| DBN1      | 6.27447 | 0.689772 |
| DBNL      | 6.66954 | 0.400197 |
| DCAF10    | 5.5719  | 0.447835 |
| DCAF12    | 7.146   | 0.683725 |
| DCAF13    | 5.40739 | 0.50398  |
| DCAF16    | 6.1387  | 0.522746 |
| DCAF17    | 5.33753 | 0.597513 |
| DCBLD1    | 6.26679 | 0.759257 |
| DCK       | 5.6673  | 1.18404  |
| DCLRE1A   | 5.70248 | 0.576317 |
| DCP1A     | 6.99685 | 0.445547 |
| DCP1B     | 6.35877 | 0.611909 |
| DCP2      | 4.95178 | 0.419305 |
| DCPS      | 7.97802 | 0.63571  |
| DCTD      | 7.78313 | 0.41575  |
| DCTN1     | 6.95012 | 0.40393  |
| DCTN3     | 9.14125 | 0.494122 |
| DCTN4     | 6.30893 | 0.43973  |
| DCTN6     | 8.41168 | 0.503919 |
| DCTPP1    | 7.65169 | 0.59065  |
| DCUN1D1   | 5.91167 | 0.486783 |
| DCUN1D2   | 5.67309 | 0.408495 |
| DCUN1D4   | 5.82096 | 0.602662 |
| DCUN1D5   | 5.55242 | 0.438319 |
| DCXR      | 8.20818 | 0.588639 |
| DDAH2     | 6.5845  | 0.464442 |
| DDB2      | 6.35567 | 0.648728 |
| DDHD1     | 6.23671 | 0.573053 |

|         |         |          |
|---------|---------|----------|
| DDHD2   | 6.28384 | 0.818343 |
| DDIAS   | 5.86732 | 0.808157 |
| DDIT3   | 8.05329 | 0.868526 |
| DDIT4   | 9.74996 | 1.33176  |
| DDN     | 6.22377 | 0.414326 |
| DDOST   | 10.8796 | 0.465706 |
| DDR1    | 5.60781 | 0.473182 |
| DDR2    | 5.7334  | 0.580036 |
| DDRGK1  | 8.30054 | 0.49395  |
| DDT     | 7.93742 | 0.605018 |
| DDTL    | 7.93742 | 0.605018 |
| DDX1    | 9.45401 | 0.454694 |
| DDX11   | 6.8517  | 0.534442 |
| DDX11L2 | 5.26276 | 0.458819 |
| DDX12P  | 6.73377 | 0.666891 |
| DDX17   | 8.49421 | 0.892571 |
| DDX18   | 8.42365 | 0.507776 |
| DDX20   | 4.89591 | 0.513548 |
| DDX21   | 9.34458 | 0.498111 |
| DDX23   | 6.83273 | 0.483036 |
| DDX24   | 8.38722 | 0.544662 |
| DDX26B  | 6.43559 | 0.810393 |
| DDX39A  | 9.54999 | 0.655071 |
| DDX39B  | 7.57275 | 0.550332 |
| DDX3Y   | 5.19556 | 1.49035  |
| DDX41   | 7.62186 | 0.471927 |
| DDX46   | 7.72428 | 0.438067 |
| DDX47   | 8.9057  | 0.485314 |
| DDX5    | 9.72152 | 0.44455  |
| DDX50   | 6.39182 | 0.403942 |
| DDX55   | 5.83156 | 0.549056 |
| DDX58   | 5.84998 | 0.702772 |
| DDX59   | 6.60482 | 0.428462 |
| DDX6    | 6.72039 | 0.464558 |
| DECR1   | 8.45687 | 0.539235 |
| DEDD    | 6.34584 | 0.430903 |
| DEDD2   | 8.40324 | 0.434152 |
| DEF6    | 7.2603  | 0.423326 |
| DEF8    | 7.2016  | 0.468277 |
| DEFA1   | 8.56391 | 2.35235  |
| DEFA1B  | 8.56391 | 2.35235  |
| DEFA3   | 8.56391 | 2.35235  |
| DEFA4   | 6.21207 | 1.23505  |
| DEFB4A  | 4.83981 | 0.553085 |
| DEFB4B  | 4.83981 | 0.553085 |
| DEGS1   | 8.57118 | 0.584506 |
| DEGS2   | 4.89567 | 0.463834 |

|         |         |          |
|---------|---------|----------|
| DEK     | 5.40749 | 1.49464  |
| DENND1B | 6.65421 | 0.752989 |
| DENND1C | 6.69064 | 0.634514 |
| DENND2C | 6.1765  | 0.860035 |
| DENND2D | 5.43299 | 0.506002 |
| DENND3  | 6.77777 | 0.834775 |
| DENND4A | 6.2582  | 0.750419 |
| DENND4B | 7.52212 | 0.568625 |
| DENND4C | 5.42855 | 0.762779 |
| DENND5B | 6.4135  | 0.474677 |
| DENND6A | 7.8602  | 0.593312 |
| DENND6B | 5.74469 | 0.61663  |
| DEPTOR  | 6.23163 | 0.999528 |
| DERA    | 7.36527 | 0.706587 |
| DERL1   | 9.1369  | 0.414499 |
| DERL2   | 8.51356 | 0.500293 |
| DERL3   | 8.00361 | 0.691339 |
| DESI1   | 7.13822 | 0.543055 |
| DET1    | 5.42017 | 0.478814 |
| DEXI    | 7.10061 | 0.432955 |
| DFFB    | 5.50303 | 0.564834 |
| DFNB31  | 6.19501 | 0.773951 |
| DGAT1   | 6.52148 | 0.52621  |
| DGAT2   | 6.13137 | 0.71736  |
| DGCR6   | 7.26562 | 0.526267 |
| DGKA    | 5.67988 | 0.569828 |
| DGKD    | 7.35754 | 0.611825 |
| DGKQ    | 5.00058 | 0.533189 |
| DHCR7   | 6.54711 | 0.529887 |
| DHFR    | 6.15504 | 0.734969 |
| DHFRL1  | 5.52613 | 0.56639  |
| DHPS    | 8.0607  | 0.512915 |
| DHRS1   | 7.00454 | 0.542058 |
| DHRS11  | 5.25882 | 0.598715 |
| DHRS13  | 7.06685 | 0.509322 |
| DHRS3   | 5.40289 | 0.478833 |
| DHRS4   | 7.41091 | 0.442677 |
| DHRS4L2 | 7.41091 | 0.442677 |
| DHRS7B  | 6.80916 | 0.743367 |
| DHRS9   | 6.44074 | 2.08065  |
| DHTKD1  | 6.2614  | 0.602465 |
| DHX15   | 9.62035 | 0.473181 |
| DHX16   | 7.54561 | 0.453095 |
| DHX29   | 7.82151 | 0.732802 |
| DHX32   | 7.72068 | 0.487334 |
| DHX33   | 6.86714 | 0.542418 |
| DHX40   | 7.16838 | 0.54587  |

|               |         |          |
|---------------|---------|----------|
| DHX9          | 7.21131 | 0.602306 |
| DIABLO        | 8.10432 | 0.423793 |
| DIEXF         | 5.33499 | 0.753842 |
| DIMT1         | 7.14638 | 0.482472 |
| DIS3          | 5.28539 | 0.451635 |
| DIS3L         | 7.39677 | 0.504514 |
| DIS3L2        | 5.75673 | 0.422759 |
| DKC1          | 8.43967 | 0.685712 |
| DKFZP434I0714 | 6.97683 | 0.972807 |
| DKFZP586I1420 | 8.33018 | 0.598234 |
| DKFZp667J0810 | 6.78241 | 1.93477  |
| DKK1          | 8.44938 | 2.33703  |
| DLAT          | 7.03673 | 0.72658  |
| DLD           | 7.11138 | 0.540713 |
| DLEC1         | 5.68528 | 0.442832 |
| DLEU1         | 7.54305 | 0.825565 |
| DLG1          | 6.36009 | 0.498223 |
| DLST          | 6.70114 | 0.549828 |
| DMAP1         | 6.05324 | 0.422116 |
| DMRT2         | 5.50828 | 1.14559  |
| DMTF1         | 8.81884 | 0.444765 |
| DMXL1         | 6.91016 | 0.748669 |
| DMXL2         | 4.92891 | 0.705907 |
| DNA2          | 5.4403  | 0.515129 |
| DNAAF1        | 6.15593 | 0.845865 |
| DNAAF2        | 6.91834 | 0.650153 |
| DNAJA1        | 9.60216 | 0.459981 |
| DNAJA2        | 7.34161 | 0.561217 |
| DNAJA3        | 7.46882 | 0.554917 |
| DNAJB1        | 7.99568 | 0.634176 |
| DNAJB11       | 10.8922 | 0.530572 |
| DNAJB14       | 7.76415 | 0.695754 |
| DNAJB2        | 5.92587 | 0.480173 |
| DNAJB4        | 4.87217 | 0.531153 |
| DNAJB6        | 7.11667 | 0.576813 |
| DNAJB9        | 10.4138 | 0.664784 |
| DNAJC1        | 11.0412 | 0.500972 |
| DNAJC10       | 7.82062 | 0.650554 |
| DNAJC12       | 5.67918 | 1.05356  |
| DNAJC14       | 6.55477 | 0.509747 |
| DNAJC15       | 7.21105 | 0.650715 |
| DNAJC17       | 5.75728 | 0.408389 |
| DNAJC18       | 5.0929  | 0.400853 |
| DNAJC19       | 7.57068 | 0.468169 |
| DNAJC24       | 5.57763 | 0.474209 |
| DNAJC25       | 7.4059  | 0.648782 |
| DNAJC25-GNG10 | 7.4059  | 0.648782 |

|          |         |          |
|----------|---------|----------|
| DNAJC3   | 8.72254 | 0.753379 |
| DNASE1L1 | 7.22758 | 0.636655 |
| DNASE2   | 7.64358 | 0.596478 |
| DNMT1    | 7.41195 | 0.786221 |
| DNMT3B   | 5.03862 | 0.70418  |
| DNPH1    | 7.38083 | 0.512061 |
| DNTTIP1  | 6.8747  | 0.464227 |
| DNTTIP2  | 8.59534 | 0.602356 |
| DOCK10   | 5.03745 | 0.811844 |
| DOCK11   | 5.69003 | 1.0937   |
| DOCK7    | 4.88281 | 0.431552 |
| DOCK8    | 6.85183 | 0.553901 |
| DOK3     | 6.7056  | 0.769586 |
| DOLK     | 6.68758 | 0.63871  |
| DONSON   | 7.10254 | 0.824283 |
| DPAGT1   | 8.23443 | 0.60151  |
| DPCD     | 6.70715 | 0.677469 |
| DPEP1    | 6.67841 | 1.11616  |
| DPEP3    | 4.91501 | 0.504579 |
| DPF2     | 7.81971 | 0.660698 |
| DPH2     | 7.22128 | 0.43122  |
| DPH3     | 7.28374 | 0.594907 |
| DPH5     | 7.15659 | 0.490318 |
| DPH7     | 7.63131 | 0.430471 |
| DPM1     | 9.35555 | 0.569058 |
| DPM2     | 7.75218 | 0.400957 |
| DPM3     | 8.28463 | 0.948068 |
| DPP3     | 7.1648  | 0.620134 |
| DPP7     | 6.50468 | 0.481705 |
| DPP8     | 7.20561 | 0.485971 |
| DPY19L3  | 7.23112 | 0.653343 |
| DPY19L4  | 4.83712 | 0.521554 |
| DPY30    | 7.68752 | 0.451638 |
| DQ592230 | 5.84182 | 1.45981  |
| DQ592442 | 4.88537 | 0.854053 |
| DQ597730 | 5.02745 | 0.622469 |
| DQ786293 | 6.10777 | 2.2316   |
| DRAM1    | 4.96325 | 0.634489 |
| DRAM2    | 7.28082 | 0.760235 |
| DRAP1    | 7.86467 | 0.536285 |
| DRG1     | 8.53347 | 0.488952 |
| DROSHA   | 7.73101 | 0.525923 |
| DSERG1   | 6.78325 | 0.751257 |
| DSN1     | 5.36046 | 0.494517 |
| DST      | 5.47487 | 0.558279 |
| DTD2     | 6.24385 | 0.615292 |
| DTL      | 5.77384 | 1.46501  |

|              |         |          |
|--------------|---------|----------|
| DTNBP1       | 6.46205 | 0.426224 |
| DTWD1        | 5.54514 | 0.421306 |
| DTX1         | 5.66706 | 0.512262 |
| DTX3L        | 8.17739 | 0.97657  |
| DUS1L        | 8.50258 | 0.47185  |
| DUS4L        | 5.18269 | 0.438347 |
| DUSP1        | 9.3596  | 0.574146 |
| DUSP10       | 5.93209 | 1.10403  |
| DUSP11       | 7.51993 | 0.548285 |
| DUSP12       | 8.14922 | 0.562828 |
| DUSP13       | 5.28185 | 0.56582  |
| DUSP14       | 5.31426 | 0.583219 |
| DUSP2        | 7.73459 | 1.58695  |
| DUSP22       | 9.61901 | 0.818201 |
| DUSP23       | 6.62515 | 0.661481 |
| DUSP26       | 7.05375 | 0.783009 |
| DUSP28       | 7.53263 | 0.486092 |
| DUSP4        | 6.75598 | 1.75827  |
| DUSP5        | 10.6195 | 1.07955  |
| DUSP6        | 8.07572 | 1.66394  |
| DUSP7        | 5.18462 | 0.429354 |
| DUT          | 8.77358 | 0.56404  |
| DUXAP10      | 4.82007 | 1.29036  |
| DVL1         | 7.35657 | 0.477885 |
| DXO          | 7.12731 | 0.523544 |
| DYNC1LI1     | 7.45013 | 0.490142 |
| DYNLL1       | 10.8112 | 0.499365 |
| DYNLT1       | 9.07316 | 0.696862 |
| DYNLT3       | 7.09671 | 0.772117 |
| DYRK2        | 5.16468 | 0.622579 |
| DYRK4        | 7.05531 | 0.537547 |
| DYSF         | 6.48478 | 0.43829  |
| DYX1C1-CCPG1 | 8.31804 | 0.643356 |
| DZIP3        | 6.01442 | 0.590293 |
| E2F2         | 5.60328 | 0.420694 |
| E2F3         | 7.08377 | 0.551853 |
| E2F5         | 7.45423 | 0.766926 |
| E2F6         | 6.3339  | 0.720551 |
| EAF1         | 6.09007 | 0.642513 |
| EAF2         | 6.35033 | 0.736867 |
| EAPP         | 8.37481 | 0.59893  |
| EARS2        | 5.80873 | 0.408788 |
| EBAG9        | 9.01894 | 0.519922 |
| EBLN2        | 6.67281 | 0.500925 |
| EBLN3        | 9.22634 | 0.505004 |
| EBNA1BP2     | 7.74088 | 0.6178   |
| EBPL         | 8.58621 | 0.836977 |



|                |         |          |
|----------------|---------|----------|
| ECD            | 6.93008 | 0.609374 |
| ECHDC1         | 7.84423 | 0.684761 |
| ECHDC2         | 6.09281 | 0.605718 |
| ECHDC3         | 5.44461 | 0.683463 |
| ECHS1          | 8.39041 | 0.531242 |
| ECI1           | 7.6276  | 0.449118 |
| ECI2           | 8.43202 | 0.524124 |
| ECSIT          | 6.97922 | 0.52098  |
| EDEM1          | 8.94147 | 0.777278 |
| EDEM2          | 8.34398 | 0.714904 |
| EDEM3          | 8.13338 | 0.957062 |
| EDN1           | 5.09307 | 0.648955 |
| EDNRB          | 7.3888  | 3.23693  |
| EDNRB-AS1      | 5.13202 | 1.17836  |
| EDRF1          | 5.09234 | 0.48722  |
| EED            | 5.53762 | 0.602622 |
| EEF1D          | 8.90299 | 0.485001 |
| EEF1DP5        | 5.25406 | 0.409895 |
| EEF1E1         | 6.32645 | 0.579305 |
| EEF1E1-BLOC1S5 | 6.6558  | 0.563247 |
| EEF2           | 12.5872 | 0.516119 |
| EEF2K          | 6.57483 | 0.55091  |
| EFCAB4A        | 6.52852 | 0.525994 |
| EFCAB7         | 5.52627 | 0.827472 |
| EFHC1          | 5.58054 | 0.687311 |
| EFHD2          | 5.87073 | 0.513144 |
| EFNA4          | 5.32717 | 0.485495 |
| EFR3A          | 7.59884 | 0.680239 |
| EFTUD1         | 6.40128 | 0.635047 |
| EGFL7          | 5.61066 | 0.410622 |
| EGLN1          | 6.32172 | 0.411221 |
| EGR1           | 9.93712 | 1.5377   |
| EGR2           | 6.10933 | 1.19648  |
| EHBP1          | 6.54041 | 0.533661 |
| EHBP1L1        | 6.21141 | 0.509337 |
| EHD1           | 6.02696 | 0.634625 |
| EHD3           | 5.22564 | 0.692913 |
| EHD4           | 5.26083 | 0.556205 |
| EI24           | 7.59118 | 0.589043 |
| EID1           | 9.32262 | 0.606539 |
| EID2           | 6.30036 | 0.714573 |
| EIF1AD         | 6.59313 | 0.446786 |
| EIF1AX         | 8.48808 | 0.540932 |
| EIF1AY         | 5.40482 | 2.22228  |
| EIF1B          | 6.52447 | 0.451832 |
| EIF2A          | 10.9812 | 0.624772 |
| EIF2AK1        | 7.17639 | 0.44141  |

|           |         |          |
|-----------|---------|----------|
| EIF2AK2   | 6.8846  | 0.614434 |
| EIF2AK3   | 7.25088 | 0.461301 |
| EIF2AK4   | 6.1152  | 0.569605 |
| EIF2B2    | 7.13821 | 0.548238 |
| EIF2B3    | 7.49323 | 0.491947 |
| EIF2D     | 8.90027 | 0.576882 |
| EIF2S1    | 8.08329 | 0.587936 |
| EIF2S3    | 8.92536 | 0.691035 |
| EIF3A     | 8.8452  | 0.421944 |
| EIF3B     | 7.0726  | 0.455614 |
| EIF3C     | 8.98027 | 0.467174 |
| EIF3CL    | 10.4597 | 0.544303 |
| EIF3D     | 10.6634 | 0.536544 |
| EIF3E     | 8.68262 | 0.52101  |
| EIF3F     | 6.87184 | 0.483937 |
| EIF3G     | 10.2324 | 0.54464  |
| EIF3H     | 7.55196 | 0.507121 |
| EIF3I     | 9.25526 | 0.42549  |
| EIF3J     | 8.24177 | 0.667418 |
| EIF3J-AS1 | 5.5684  | 0.632042 |
| EIF3L     | 12.0696 | 0.530266 |
| EIF3LP3   | 4.88526 | 0.413081 |
| EIF3M     | 6.59499 | 0.432119 |
| EIF4A1    | 10.5157 | 0.552191 |
| EIF4A3    | 8.55739 | 0.734564 |
| EIF4B     | 9.71679 | 0.604999 |
| EIF4E3    | 6.33751 | 0.644265 |
| EIF4EBP1  | 7.14892 | 0.932248 |
| EIF4EBP3  | 7.188   | 0.694718 |
| EIF4G1    | 7.77427 | 0.567389 |
| EIF4G3    | 5.72079 | 0.447236 |
| EIF5      | 8.81462 | 0.655325 |
| EIF5A     | 8.74668 | 0.756137 |
| EIF6      | 8.39942 | 0.476899 |
| ELANE     | 5.04717 | 1.0698   |
| ELF1      | 8.24777 | 0.696164 |
| ELF2      | 6.80568 | 0.477632 |
| ELF4      | 5.32863 | 0.534344 |
| ELFN1-AS1 | 5.34655 | 0.626484 |
| ELK3      | 6.896   | 0.580724 |
| ELL2      | 8.48476 | 0.752392 |
| ELMO1     | 7.18734 | 0.700969 |
| ELOVL1    | 7.39797 | 0.427483 |
| ELOVL7    | 6.63356 | 1.7234   |
| ELP3      | 6.48088 | 0.559742 |
| ELP4      | 7.0134  | 0.645121 |
| ELP5      | 6.98825 | 0.434929 |

|              |         |          |
|--------------|---------|----------|
| EMB          | 7.14399 | 0.4876   |
| EMC2         | 7.77372 | 0.792613 |
| EMC6         | 8.41919 | 0.455839 |
| EMC7         | 7.61768 | 0.515339 |
| EMC8         | 6.82742 | 0.427537 |
| EMC9         | 7.03075 | 0.457302 |
| EMD          | 7.07721 | 0.45109  |
| EME1         | 6.3206  | 0.49427  |
| EMG1         | 7.675   | 0.648791 |
| EML4         | 6.46443 | 0.579802 |
| EML6         | 6.1825  | 0.940875 |
| EMP3         | 9.58069 | 1.09212  |
| ENC1         | 4.84663 | 0.931755 |
| ENDOD1       | 5.07063 | 0.636147 |
| ENDOG        | 6.85139 | 0.608197 |
| ENKD1        | 5.71906 | 0.424609 |
| ENO1         | 7.0426  | 0.461571 |
| ENO2         | 6.11552 | 1.19647  |
| ENOPH1       | 8.94362 | 0.57797  |
| ENOSF1       | 6.70777 | 0.772123 |
| ENPP4        | 5.78576 | 0.975757 |
| ENPP7        | 5.42289 | 0.481977 |
| ENSA         | 7.58447 | 0.588599 |
| ENTPD1       | 4.90761 | 1.13115  |
| ENTPD4       | 7.10846 | 0.632409 |
| ENY2         | 6.03522 | 0.478534 |
| EP300        | 5.88169 | 0.587441 |
| EPAS1        | 5.33301 | 0.749628 |
| EPB41L2      | 4.82799 | 0.6038   |
| EPB41L4A     | 5.26039 | 0.573457 |
| EPB41L4A-AS1 | 7.45807 | 0.63665  |
| EPC1         | 7.32048 | 0.480383 |
| EPC2         | 5.79485 | 0.648277 |
| EPHB6        | 4.9822  | 0.453256 |
| EPHX1        | 7.11685 | 0.888509 |
| EPHX2        | 6.11963 | 1.09973  |
| EPM2AIP1     | 7.47361 | 0.561406 |
| EPRS         | 9.56004 | 0.56593  |
| EPS15        | 7.85543 | 0.700649 |
| EPS8         | 4.97483 | 1.21901  |
| EPSTI1       | 6.42984 | 1.07776  |
| EPT1         | 6.30715 | 0.429317 |
| EPX          | 5.08242 | 0.777827 |
| ERAL1        | 6.37585 | 0.480614 |
| ERAP2        | 6.27616 | 1.11435  |
| ERBB2IP      | 6.77364 | 0.556705 |
| ERCC1        | 7.2936  | 0.469655 |

|         |         |          |
|---------|---------|----------|
| ERCC3   | 6.55653 | 0.433892 |
| ERCC4   | 5.14303 | 0.504249 |
| ERCC5   | 7.16542 | 0.619361 |
| ERGIC1  | 7.00278 | 0.471579 |
| ERGIC2  | 7.83695 | 0.519636 |
| ERH     | 9.89923 | 0.565153 |
| ERI3    | 6.41547 | 0.410089 |
| ERLEC1  | 8.4938  | 0.515443 |
| ERLIN1  | 6.01199 | 0.662151 |
| ERLIN2  | 5.49963 | 0.61878  |
| ERMARD  | 6.79538 | 0.498449 |
| ERMP1   | 5.54986 | 0.597177 |
| ERN1    | 7.84234 | 0.672601 |
| ERO1L   | 7.61859 | 0.558153 |
| ERO1LB  | 6.69589 | 0.933389 |
| ERP29   | 10.7014 | 0.475156 |
| ERV3-2  | 7.06403 | 1.11465  |
| ERVK3-1 | 6.58319 | 0.584436 |
| ESAM    | 5.42157 | 0.474386 |
| ESCO1   | 6.47872 | 0.825878 |
| ESF1    | 5.78339 | 0.612392 |
| ESPL1   | 5.26769 | 0.489312 |
| ESRRG   | 6.42626 | 1.48721  |
| ESYT1   | 7.21329 | 0.600542 |
| ESYT2   | 5.89677 | 0.453214 |
| ETAA1   | 5.36404 | 0.435192 |
| ETF1    | 8.27058 | 0.521223 |
| ETFA    | 9.21076 | 0.844464 |
| ETFB    | 7.44697 | 0.905411 |
| ETFDH   | 5.78243 | 0.679276 |
| ETHE1   | 7.51569 | 0.560867 |
| ETNK1   | 6.31055 | 0.529287 |
| ETNK2   | 4.82157 | 0.42137  |
| ETS1    | 4.97228 | 1.00948  |
| ETV1    | 5.16796 | 1.206    |
| ETV3    | 5.85526 | 0.436985 |
| ETV5    | 5.5345  | 0.531887 |
| ETV6    | 6.24483 | 0.578158 |
| EVI2A   | 9.72231 | 0.930427 |
| EVI2B   | 11.288  | 0.777854 |
| EVL     | 6.02144 | 0.713586 |
| EWSR1   | 6.89658 | 0.422897 |
| EXD2    | 5.83795 | 0.422209 |
| EXO1    | 5.33915 | 0.852771 |
| EXOC1   | 7.82283 | 0.574772 |
| EXOC2   | 5.55233 | 0.529093 |
| EXOC5   | 5.62271 | 0.585071 |

|          |         |          |
|----------|---------|----------|
| EXOC6    | 5.3691  | 0.425126 |
| EXOC8    | 6.26163 | 0.907579 |
| EXOSC3   | 5.40373 | 0.420265 |
| EXOSC4   | 7.28015 | 0.510566 |
| EXOSC5   | 7.83628 | 0.605245 |
| EXOSC6   | 6.19776 | 0.422359 |
| EXOSC8   | 7.20178 | 0.80328  |
| EXOSC9   | 7.5831  | 0.415449 |
| EXT1     | 5.01804 | 0.407177 |
| EXT2     | 6.8554  | 0.574169 |
| EXTL2    | 6.89434 | 1.01412  |
| EYA2     | 4.98309 | 1.0423   |
| EZH2     | 5.94859 | 1.11164  |
| EZR      | 8.08542 | 0.802236 |
| F11R     | 6.61233 | 0.458326 |
| F12      | 5.41894 | 0.537001 |
| F13A1    | 4.86015 | 0.968302 |
| F2R      | 4.83563 | 1.06131  |
| F8       | 5.65844 | 0.810208 |
| F8A1     | 8.56066 | 0.735448 |
| F8A2     | 8.56066 | 0.735448 |
| F8A3     | 8.56066 | 0.735448 |
| FAAH     | 5.68546 | 0.477091 |
| FAAH2    | 6.83014 | 0.842891 |
| FABP5    | 6.20016 | 1.41667  |
| FADD     | 6.3234  | 0.679729 |
| FADS3    | 6.14275 | 0.542603 |
| FAF2     | 7.84708 | 0.441026 |
| FAHD1    | 5.35789 | 0.59857  |
| FAIM     | 6.88988 | 0.784374 |
| FAIM3    | 6.09125 | 1.24442  |
| FAM101B  | 7.43246 | 1.71453  |
| FAM102B  | 5.41961 | 0.896771 |
| FAM103A1 | 7.78726 | 0.579879 |
| FAM104A  | 7.66952 | 0.521421 |
| FAM106A  | 5.38465 | 1.11908  |
| FAM107B  | 7.34407 | 1.8214   |
| FAM109B  | 5.42806 | 0.425183 |
| FAM111A  | 5.83391 | 0.486891 |
| FAM114A1 | 5.95158 | 0.679502 |
| FAM114A2 | 7.30874 | 0.525109 |
| FAM117A  | 8.41963 | 0.695919 |
| FAM118A  | 5.47249 | 0.630452 |
| FAM118B  | 4.94844 | 0.402461 |
| FAM120B  | 6.08756 | 0.406898 |
| FAM120C  | 5.01463 | 0.42218  |
| FAM122A  | 6.06992 | 0.556815 |

|            |         |          |
|------------|---------|----------|
| FAM122B    | 7.11544 | 0.7929   |
| FAM126A    | 5.42417 | 0.81778  |
| FAM126B    | 6.04056 | 0.619941 |
| FAM127A    | 7.8858  | 0.602476 |
| FAM127B    | 5.74927 | 0.557609 |
| FAM129A    | 6.33604 | 1.76062  |
| FAM133A    | 6.63284 | 1.74158  |
| FAM133B    | 6.05607 | 0.684055 |
| FAM133DP   | 6.05607 | 0.684055 |
| FAM134A    | 6.9513  | 0.402732 |
| FAM134C    | 8.69852 | 0.541846 |
| FAM136A    | 8.34869 | 0.417132 |
| FAM13A     | 6.43598 | 0.820992 |
| FAM13A-AS1 | 5.59451 | 0.644575 |
| FAM13B     | 6.84989 | 0.7554   |
| FAM149A    | 5.54274 | 0.791139 |
| FAM160A2   | 6.54275 | 0.440414 |
| FAM162A    | 7.54929 | 0.448649 |
| FAM171A1   | 5.82408 | 1.49197  |
| FAM172A    | 6.11079 | 0.542446 |
| FAM173A    | 7.31565 | 0.576052 |
| FAM173B    | 5.68407 | 0.436561 |
| FAM174A    | 9.29616 | 0.991228 |
| FAM175A    | 5.30087 | 0.745716 |
| FAM175B    | 6.37814 | 0.546554 |
| FAM177A1   | 6.07812 | 0.581604 |
| FAM178A    | 5.15299 | 0.411206 |
| FAM179B    | 6.58445 | 0.812304 |
| FAM186B    | 4.92693 | 0.454075 |
| FAM188A    | 6.97824 | 0.922641 |
| FAM189A2   | 4.96454 | 0.545629 |
| FAM193A    | 6.34123 | 0.474045 |
| FAM195A    | 7.46808 | 0.546019 |
| FAM199X    | 6.52038 | 0.514822 |
| FAM19A5    | 5.37436 | 1.38062  |
| FAM206A    | 8.06645 | 0.501724 |
| FAM208A    | 5.98886 | 0.418297 |
| FAM20B     | 6.73127 | 0.642987 |
| FAM210A    | 5.10597 | 0.431918 |
| FAM210B    | 6.64451 | 0.653375 |
| FAM213A    | 6.45713 | 0.859367 |
| FAM213B    | 6.15802 | 0.584062 |
| FAM214A    | 8.51869 | 0.758102 |
| FAM216A    | 5.93897 | 0.918797 |
| FAM217B    | 6.9699  | 0.792937 |
| FAM219A    | 6.52885 | 0.431255 |
| FAM21A     | 7.74507 | 0.408493 |

|              |         |          |
|--------------|---------|----------|
| FAM21C       | 7.86529 | 0.416836 |
| FAM220A      | 8.07663 | 0.720302 |
| FAM221A      | 6.92172 | 0.692121 |
| FAM228B      | 6.17449 | 0.549672 |
| FAM229B      | 5.26015 | 0.749943 |
| FAM24B       | 5.22159 | 0.479618 |
| FAM26F       | 5.14632 | 0.997701 |
| FAM32A       | 8.07592 | 0.43884  |
| FAM35A       | 8.55957 | 0.616367 |
| FAM3C        | 6.99071 | 0.734947 |
| FAM43A       | 4.89865 | 0.447271 |
| FAM43B       | 5.26217 | 0.400788 |
| FAM45B       | 6.89384 | 0.524719 |
| FAM46A       | 5.08729 | 0.661358 |
| FAM46C       | 10.5764 | 0.670145 |
| FAM47E-STBD1 | 5.71479 | 0.890259 |
| FAM49A       | 6.49724 | 1.16173  |
| FAM50A       | 7.66247 | 0.613164 |
| FAM50B       | 5.92691 | 0.727222 |
| FAM53C       | 7.436   | 0.437661 |
| FAM57B       | 6.22167 | 0.40505  |
| FAM58A       | 7.20362 | 0.517325 |
| FAM60A       | 7.86961 | 0.935407 |
| FAM63B       | 5.89229 | 0.605091 |
| FAM65A       | 6.22479 | 0.413152 |
| FAM69A       | 7.33758 | 0.864198 |
| FAM71E1      | 4.86339 | 0.462417 |
| FAM71F2      | 4.83187 | 0.403481 |
| FAM72A       | 5.96663 | 1.60338  |
| FAM72B       | 5.96663 | 1.60338  |
| FAM72C       | 5.96663 | 1.60338  |
| FAM72D       | 5.96663 | 1.60338  |
| FAM73B       | 6.63841 | 0.415099 |
| FAM76B       | 5.83783 | 0.622388 |
| FAM78A       | 5.93034 | 0.632089 |
| FAM84B       | 5.4487  | 0.834635 |
| FAM86B1      | 5.50515 | 0.614881 |
| FAM86B2      | 5.50515 | 0.614881 |
| FAM86C1      | 5.59205 | 0.472575 |
| FAM86DP      | 5.50515 | 0.614881 |
| FAM86FP      | 5.50515 | 0.614881 |
| FAM89A       | 5.88319 | 0.801767 |
| FAM89B       | 7.61368 | 0.511916 |
| FAM8A1       | 8.68639 | 0.601657 |
| FAM96A       | 10.3364 | 0.619347 |
| FAM96B       | 8.73357 | 0.475113 |
| FAM98A       | 7.47071 | 0.488988 |

|         |         |          |
|---------|---------|----------|
| FAM98B  | 5.48927 | 0.630272 |
| FAM98C  | 6.80256 | 0.487175 |
| FANCE   | 6.40948 | 0.409778 |
| FANCF   | 7.10868 | 0.824897 |
| FANCG   | 6.64541 | 0.580449 |
| FANCI   | 5.56046 | 0.943454 |
| FANCL   | 6.73076 | 0.902913 |
| FAR1    | 6.23661 | 0.753259 |
| FAR2    | 5.44757 | 1.02717  |
| FARSA   | 7.03026 | 0.563872 |
| FARSB   | 6.2616  | 0.546691 |
| FASTKD1 | 7.77407 | 0.82041  |
| FASTKD3 | 6.81462 | 0.892864 |
| FASTKD5 | 6.78278 | 0.469362 |
| FATE1   | 6.10413 | 0.481363 |
| FBL     | 10.2515 | 0.706633 |
| FBLN2   | 5.71949 | 1.00107  |
| FBP1    | 7.36996 | 1.83643  |
| FBXL16  | 5.37062 | 0.562819 |
| FBXL20  | 5.24456 | 0.410221 |
| FBXL4   | 5.19954 | 0.656922 |
| FBXL5   | 7.69399 | 0.574656 |
| FBXL7   | 5.03532 | 0.565186 |
| FBXO11  | 6.28465 | 0.459954 |
| FBXO16  | 6.54879 | 0.659948 |
| FBXO22  | 5.57906 | 0.513626 |
| FBXO25  | 7.8756  | 0.523357 |
| FBXO28  | 6.12888 | 0.523125 |
| FBXO30  | 4.94286 | 0.495678 |
| FBXO32  | 5.11617 | 0.656045 |
| FBXO33  | 7.30814 | 0.759489 |
| FBXO34  | 7.01524 | 0.560384 |
| FBXO38  | 6.53886 | 0.500563 |
| FBXO45  | 5.61406 | 0.47482  |
| FBXO46  | 7.57728 | 0.482364 |
| FBXO5   | 5.27873 | 0.799525 |
| FBXO6   | 5.58422 | 0.808707 |
| FBXO7   | 7.35245 | 0.453017 |
| FBXO8   | 6.58602 | 0.710212 |
| FBXW11  | 6.64832 | 0.456213 |
| FBXW7   | 8.72614 | 0.733987 |
| FCER1G  | 5.23863 | 1.00695  |
| FCER2   | 5.22024 | 1.20372  |
| FCF1    | 5.06044 | 0.457399 |
| FCGBP   | 5.46035 | 0.591998 |
| FCGR2B  | 8.43264 | 1.76425  |
| FCGR2C  | 6.35854 | 0.705176 |



|          |         |          |
|----------|---------|----------|
| FCGR3A   | 5.27437 | 1.26846  |
| FCGR3B   | 5.61974 | 1.3091   |
| FCGRT    | 7.50887 | 0.818462 |
| FCHO1    | 6.02185 | 0.435095 |
| FCHSD2   | 7.55239 | 0.858627 |
| FCN1     | 5.21062 | 1.19767  |
| FCRL2    | 6.37738 | 1.20988  |
| FCRL3    | 4.88154 | 1.0184   |
| FCRL5    | 7.73056 | 0.804889 |
| FCRLA    | 8.27882 | 1.95253  |
| FCRLB    | 7.17584 | 1.32854  |
| FDFT1    | 7.28447 | 0.637314 |
| FDPS     | 8.89577 | 0.608623 |
| FDX1     | 7.6833  | 0.44043  |
| FDXACB1  | 6.35928 | 0.614457 |
| FDXR     | 5.0593  | 0.457853 |
| FECH     | 5.49865 | 0.470695 |
| FEM1B    | 6.28979 | 0.716557 |
| FEM1C    | 6.81827 | 0.892966 |
| FEN1     | 7.14448 | 0.918424 |
| FER      | 6.165   | 0.763122 |
| FER1L4   | 6.06533 | 0.72819  |
| FERMT3   | 7.0704  | 0.526856 |
| FGD2     | 5.87203 | 0.443817 |
| FGD3     | 5.89301 | 0.400075 |
| FGF13    | 5.58187 | 1.69781  |
| FGFR1OP2 | 6.0763  | 0.485632 |
| FGL2     | 5.52923 | 1.48224  |
| FH       | 7.80671 | 0.706753 |
| FHDC1    | 5.70657 | 0.48516  |
| FHIT     | 5.61605 | 0.738996 |
| FHL1     | 6.65897 | 1.59388  |
| FHOD1    | 5.79772 | 0.469392 |
| FIBP     | 8.07022 | 0.618521 |
| FICD     | 8.38588 | 0.719291 |
| FIG4     | 7.04468 | 0.654095 |
| FIGNL1   | 4.96709 | 1.02818  |
| FIP1L1   | 5.79151 | 0.405637 |
| FIS1     | 9.55431 | 0.480606 |
| FJX1     | 4.91542 | 0.588125 |
| FKBP11   | 10.7146 | 0.666095 |
| FKBP14   | 6.82693 | 0.733132 |
| FKBP1A   | 7.03946 | 0.499885 |
| FKBP2    | 10.4963 | 0.559975 |
| FKBP5    | 7.74165 | 1.2687   |
| FKBP9    | 5.44649 | 0.680216 |
| FKTN     | 5.36915 | 0.721329 |

|            |         |          |
|------------|---------|----------|
| FLAD1      | 7.25956 | 0.567011 |
| FLI1       | 7.09804 | 0.553133 |
| FLJ10038   | 5.2994  | 0.686229 |
| FLJ11710   | 5.49471 | 0.409592 |
| FLJ16734   | 5.01954 | 0.568077 |
| FLJ20021   | 7.29983 | 0.495524 |
| FLJ22184   | 5.32432 | 0.427745 |
| FLJ25758   | 5.33509 | 0.450248 |
| FLJ30901   | 5.43501 | 0.457334 |
| FLJ31306   | 6.21766 | 0.751026 |
| FLJ32255   | 6.01697 | 0.806462 |
| FLJ38717   | 5.79075 | 0.717142 |
| FLJ46875   | 6.27104 | 0.478504 |
| FLNA       | 6.78705 | 0.704816 |
| FLNB       | 5.97363 | 0.573896 |
| FLVCR1     | 4.91665 | 0.740935 |
| FLVCR1-AS1 | 6.1213  | 0.67882  |
| FMNL1      | 6.06718 | 0.447711 |
| FMO4       | 5.55818 | 0.439606 |
| FMR1       | 7.25034 | 0.968699 |
| FN3KRP     | 7.41495 | 0.535778 |
| FNBP1      | 6.31153 | 1.14129  |
| FNBP4      | 5.71144 | 0.450632 |
| FNDC3A     | 6.72596 | 0.439627 |
| FNDC3B     | 8.06985 | 0.644222 |
| FNIP1      | 4.94314 | 0.414441 |
| FNIP2      | 5.8045  | 0.770978 |
| FNTA       | 7.04843 | 0.458885 |
| FOPNL      | 7.24132 | 0.595863 |
| FOS        | 11.5394 | 1.23736  |
| FOSB       | 10.2218 | 1.36052  |
| FOXO1      | 4.83347 | 0.706327 |
| FOXO2      | 6.16814 | 0.446253 |
| FOXO3      | 5.6429  | 0.46598  |
| FOXO3B     | 8.58289 | 0.605705 |
| FOXO6      | 8.08138 | 0.654067 |
| FOXO6      | 5.91846 | 0.513916 |
| FOXP1      | 5.58672 | 0.695799 |
| FOXP1-IT1  | 5.78314 | 0.510584 |
| FOXRED1    | 6.93665 | 0.558251 |
| FPR1       | 4.81835 | 0.690078 |
| FRAT1      | 5.43159 | 0.530962 |
| FRAT2      | 6.20027 | 0.61696  |
| FRG1       | 7.07294 | 0.5241   |
| FRG1B      | 5.75335 | 0.540881 |
| FRMD6      | 6.25338 | 1.63563  |
| FRZB       | 7.19459 | 1.91874  |

|            |         |          |
|------------|---------|----------|
| FTH1       | 9.61613 | 0.743993 |
| FTH1P5     | 10.7673 | 0.525262 |
| FTL        | 12.7207 | 0.461583 |
| FTO        | 7.02057 | 0.504413 |
| FTSJ2      | 6.96198 | 0.568066 |
| FTSJ3      | 7.55938 | 0.501743 |
| FTX        | 6.67568 | 0.890742 |
| FUBP1      | 6.51466 | 0.516445 |
| FUBP3      | 7.05506 | 0.451764 |
| FUCA2      | 7.97385 | 0.95723  |
| FUK        | 6.44611 | 0.443454 |
| FUNDC1     | 6.12755 | 0.746721 |
| FUOM       | 6.32804 | 0.647326 |
| FUS        | 6.95518 | 0.449272 |
| FUT11      | 5.25556 | 0.487685 |
| FUT8       | 7.56195 | 1.34537  |
| FUT8-AS1   | 5.25759 | 0.560547 |
| FXN        | 5.69376 | 0.440046 |
| FXYD5      | 10.0042 | 0.949949 |
| FYN        | 4.84287 | 0.84056  |
| FYTTD1     | 8.80163 | 0.512914 |
| FZD2       | 5.46137 | 0.468414 |
| FZD3       | 6.00208 | 0.821129 |
| FZD6       | 7.15803 | 1.28251  |
| FZD7       | 5.23805 | 1.21715  |
| G0S2       | 7.21919 | 1.50602  |
| G2E3       | 5.43836 | 0.652037 |
| G3BP1      | 6.66097 | 0.414813 |
| G3BP2      | 8.02594 | 0.512611 |
| G6PC3      | 7.92598 | 0.497753 |
| G6PD       | 6.43059 | 0.593614 |
| GAA        | 6.59182 | 0.47325  |
| GAB1       | 6.05433 | 0.470146 |
| GAB2       | 7.06446 | 0.701377 |
| GABARAP    | 10.4435 | 0.453058 |
| GABARAPL1  | 7.38679 | 0.990559 |
| GABARAPL2  | 9.64996 | 0.534147 |
| GABARAPL3  | 6.00838 | 0.688493 |
| GABPA      | 6.00332 | 0.583264 |
| GABPB1     | 6.14741 | 0.588822 |
| GABPB1-AS1 | 6.02185 | 0.741471 |
| GABPB2     | 6.1613  | 0.513412 |
| GADD45A    | 10.3331 | 1.4301   |
| GADD45B    | 8.32278 | 0.987743 |
| GAGE12B    | 4.96109 | 1.87345  |
| GAGE12C    | 5.0126  | 1.83063  |
| GAGE12D    | 5.0126  | 1.83063  |

|          |         |          |
|----------|---------|----------|
| GAGE12E  | 5.0126  | 1.83063  |
| GAGE12F  | 4.96109 | 1.87345  |
| GAGE12G  | 4.96109 | 1.87345  |
| GAGE12H  | 5.0126  | 1.83063  |
| GAGE12I  | 4.96109 | 1.87345  |
| GAGE12J  | 5.04984 | 1.76431  |
| GAGE13   | 5.04984 | 1.76431  |
| GAGE2A   | 5.07514 | 1.84391  |
| GAGE2B   | 5.51683 | 1.72929  |
| GAGE2C   | 5.07514 | 1.84391  |
| GAGE2D   | 5.04984 | 1.76431  |
| GAGE2E   | 5.16227 | 1.75235  |
| GAGE3    | 5.06576 | 1.62791  |
| GAGE4    | 4.96109 | 1.87345  |
| GAGE5    | 4.96109 | 1.87345  |
| GAGE6    | 4.96109 | 1.87345  |
| GAGE7    | 4.96109 | 1.87345  |
| GAGE8    | 5.16227 | 1.75235  |
| GALC     | 5.65227 | 0.601402 |
| GALK2    | 6.84984 | 0.56156  |
| GALM     | 6.32264 | 0.515759 |
| GALNT1   | 7.79107 | 0.83211  |
| GALNT10  | 5.66255 | 0.620725 |
| GALNT11  | 6.48884 | 0.912391 |
| GALNT12  | 5.51694 | 0.924806 |
| GALNT2   | 7.54825 | 0.505887 |
| GALNT3   | 5.59712 | 0.64632  |
| GALNT4   | 5.43221 | 0.585714 |
| GALNT6   | 5.29908 | 0.504675 |
| GALNT7   | 6.16087 | 0.902163 |
| GALNT9   | 6.28928 | 0.410387 |
| GANAB    | 9.56795 | 0.434492 |
| GAPDH    | 12.1396 | 0.55743  |
| GAPDHP62 | 6.80704 | 0.659094 |
| GAPDHP73 | 5.92698 | 0.45861  |
| GAPVD1   | 6.53383 | 0.444483 |
| GAR1     | 8.04606 | 0.571651 |
| GARS     | 10.6004 | 0.63235  |
| GART     | 5.42704 | 0.555511 |
| GAS2     | 6.71166 | 2.31598  |
| GAS5     | 8.93023 | 0.677035 |
| GAS6     | 8.96652 | 0.996719 |
| GATAD1   | 5.82091 | 0.419628 |
| GATAD2B  | 5.69539 | 0.439171 |
| GATSL2   | 6.6687  | 0.437454 |
| GBA      | 7.01102 | 0.622781 |
| GBA3     | 5.94553 | 2.2431   |

|        |         |          |
|--------|---------|----------|
| GBAP1  | 6.04172 | 0.40677  |
| GBAS   | 7.85938 | 0.754957 |
| GBE1   | 6.98494 | 0.772392 |
| GBF1   | 6.75831 | 0.497018 |
| GBP1   | 5.61053 | 1.06822  |
| GBP2   | 5.43168 | 1.15273  |
| GBP3   | 7.02512 | 1.2846   |
| GBP5   | 6.03978 | 1.04532  |
| GCA    | 6.40523 | 0.943426 |
| GCAT   | 5.78994 | 0.603525 |
| GCDH   | 7.34975 | 0.413099 |
| GCFC2  | 5.72913 | 0.540607 |
| GCH1   | 6.20422 | 1.20472  |
| GCHFR  | 6.22078 | 0.595204 |
| GCLC   | 5.67677 | 0.452674 |
| GCN1L1 | 7.2427  | 0.455756 |
| GCNT1  | 4.96135 | 0.582062 |
| GCNT3  | 4.9786  | 0.48012  |
| GCOM1  | 6.19508 | 0.417484 |
| GCSH   | 7.74551 | 0.746718 |
| GDAP2  | 5.89347 | 0.431374 |
| GDE1   | 8.10002 | 0.434657 |
| GDI1   | 8.15539 | 0.546537 |
| GDI2   | 10.0458 | 0.464743 |
| GEMIN2 | 5.49725 | 0.699746 |
| GEMIN4 | 6.00343 | 0.505723 |
| GEMIN5 | 6.57974 | 0.708096 |
| GEMIN6 | 6.04141 | 0.419765 |
| GFI1   | 6.10743 | 0.669577 |
| GFM1   | 6.17525 | 0.479715 |
| GFM2   | 6.57588 | 0.54585  |
| GFOD1  | 5.06643 | 0.614503 |
| GFPT1  | 7.41849 | 0.880511 |
| GGCT   | 7.83905 | 0.784189 |
| GGCX   | 6.17621 | 0.403388 |
| GGH    | 8.29975 | 1.35015  |
| GGNBP2 | 6.18339 | 0.430936 |
| GGPS1  | 6.59994 | 0.637815 |
| GGT1   | 6.22664 | 0.493767 |
| GGT2   | 6.34417 | 0.572665 |
| GGT3P  | 5.68224 | 0.426046 |
| GGTLC1 | 6.26741 | 0.562732 |
| GGTLC2 | 6.31625 | 0.496318 |
| GHDC   | 6.71089 | 0.615982 |
| GHITM  | 9.71332 | 0.426724 |
| GID4   | 5.34078 | 0.414264 |
| GID8   | 6.98291 | 0.410119 |

|          |         |          |
|----------|---------|----------|
| GIMAP2   | 6.28518 | 1.15639  |
| GIN1     | 5.73799 | 0.694032 |
| GINM1    | 8.42989 | 0.820074 |
| GIN51    | 5.15395 | 1.32422  |
| GIPC1    | 6.6353  | 0.462721 |
| GKAP1    | 5.62454 | 0.427136 |
| GLA      | 8.04825 | 0.678633 |
| GLB1     | 8.82448 | 0.68948  |
| GLB1L2   | 5.71399 | 0.404455 |
| GLCCI1   | 8.87676 | 0.72538  |
| GLDC     | 5.54265 | 1.49262  |
| GLE1     | 6.14002 | 0.420706 |
| GLG1     | 8.08951 | 0.451801 |
| GLI3     | 4.80111 | 0.429021 |
| GLIDR    | 6.79375 | 0.710276 |
| GLIPR1   | 5.34068 | 1.0063   |
| GLIPR2   | 6.01904 | 0.840858 |
| GLIS1    | 4.89638 | 0.48783  |
| GLIS3    | 4.83139 | 1.25279  |
| GLMN     | 5.53638 | 0.631633 |
| GLO1     | 10.3768 | 0.71463  |
| GLOD4    | 6.92558 | 0.699974 |
| GLRX     | 10.0067 | 0.872147 |
| GLRX2    | 7.95264 | 0.941298 |
| GLRX5    | 8.55732 | 0.573028 |
| GLS      | 6.44541 | 0.400997 |
| GLT1D1   | 5.24263 | 0.430811 |
| GLT8D1   | 9.31418 | 0.667596 |
| GLTP     | 7.28402 | 0.482286 |
| GLTSCR1L | 6.83861 | 0.587028 |
| GLTSCR2  | 9.52003 | 0.468529 |
| GLUD1    | 7.50007 | 0.623361 |
| GLUL     | 5.9958  | 0.923967 |
| GLYR1    | 6.25691 | 0.405305 |
| GM2A     | 6.82664 | 0.567883 |
| GMCL1    | 6.23816 | 0.674793 |
| GMCL1P1  | 5.5575  | 0.661559 |
| GMDS     | 5.70618 | 0.427815 |
| GMFB     | 6.63521 | 0.729129 |
| GMFG     | 9.04697 | 0.86039  |
| GMNN     | 7.2583  | 1.03679  |
| GMPPA    | 7.28233 | 0.488192 |
| GMPR     | 5.76111 | 0.811689 |
| GMPR2    | 7.79943 | 0.515503 |
| GMPS     | 5.35015 | 0.414552 |
| GNA11    | 5.57941 | 0.415197 |
| GNA13    | 6.86469 | 0.53588  |

|            |         |          |
|------------|---------|----------|
| GNAI2      | 7.9861  | 0.46249  |
| GNAI3      | 7.09655 | 0.578564 |
| GNAZ       | 5.38586 | 0.449347 |
| GNB1       | 8.81212 | 0.458585 |
| GNB2       | 7.58615 | 0.49909  |
| GNB2L1     | 9.77596 | 0.472575 |
| GNB3       | 6.02783 | 0.401987 |
| GNB5       | 5.73424 | 0.401898 |
| GNE        | 7.44443 | 0.644603 |
| GNG10      | 9.07037 | 0.696531 |
| GNG5       | 10.3512 | 0.48226  |
| GNG7       | 7.61671 | 0.436675 |
| GNL2       | 7.7677  | 0.587362 |
| GNL3       | 7.52783 | 0.440262 |
| GNPAT      | 8.69095 | 0.60099  |
| GNPDA1     | 6.90839 | 0.684521 |
| GNPDA2     | 6.26842 | 0.709461 |
| GNPNAT1    | 6.36493 | 0.75885  |
| GNPTAB     | 5.97368 | 0.40183  |
| GNPTG      | 8.12646 | 0.575048 |
| GNRH2      | 5.50897 | 0.408998 |
| GNS        | 7.31093 | 0.624895 |
| GOLGA1     | 6.45707 | 0.450022 |
| GOLGA2P5   | 5.4613  | 0.451549 |
| GOLGA2P7   | 6.58855 | 0.404781 |
| GOLGA4     | 8.42606 | 0.478298 |
| GOLGA5     | 8.46328 | 0.649711 |
| GOLGA6L11P | 5.3029  | 0.434598 |
| GOLGA6L16P | 5.3029  | 0.434598 |
| GOLGA6L4   | 6.62875 | 0.838701 |
| GOLGA6L5P  | 6.62875 | 0.838701 |
| GOLGA6L9   | 6.62875 | 0.838701 |
| GOLGA7     | 7.97743 | 0.524243 |
| GOLGA8A    | 7.90428 | 0.687341 |
| GOLGA8B    | 7.80165 | 0.680691 |
| GOLGA8CP   | 7.39884 | 0.44611  |
| GOLGA8DP   | 7.39884 | 0.44611  |
| GOLGA8EP   | 7.39884 | 0.44611  |
| GOLGA8F    | 7.39884 | 0.44611  |
| GOLGA8G    | 7.39884 | 0.44611  |
| GOLGA8I    | 6.89271 | 0.438072 |
| GOLGA8M    | 6.89271 | 0.438072 |
| GOLGA8N    | 9.79361 | 0.893131 |
| GOLGB1     | 7.89478 | 0.4245   |
| GOLIM4     | 6.4668  | 0.406713 |
| GOLM1      | 4.92396 | 0.741847 |
| GOLPH3     | 9.66279 | 0.638057 |

|            |         |          |
|------------|---------|----------|
| GOLPH3L    | 8.32087 | 0.862843 |
| GOLT1B     | 8.72552 | 0.535119 |
| GON4L      | 6.27476 | 0.437326 |
| GOPC       | 6.11189 | 0.492022 |
| GORAB      | 7.161   | 0.749129 |
| GORASP2    | 9.80637 | 0.483304 |
| GOT1       | 7.52606 | 0.557439 |
| GOT2       | 8.23726 | 0.509359 |
| GP1BB      | 5.01982 | 0.44952  |
| GPAA1      | 8.24088 | 0.562664 |
| GPALPP1    | 5.02004 | 0.57098  |
| GPANK1     | 7.71539 | 0.42101  |
| GPATCH1    | 6.43697 | 0.496465 |
| GPATCH11   | 5.13459 | 0.622643 |
| GPATCH8    | 7.17142 | 0.454504 |
| GPBP1      | 8.94773 | 0.48795  |
| GPBP1L1    | 7.35632 | 0.436565 |
| GPCPD1     | 7.56594 | 0.714592 |
| GPD1L      | 7.42203 | 0.71748  |
| GPHN       | 5.52883 | 0.578599 |
| GPI        | 9.23218 | 0.634084 |
| GPN1       | 7.83425 | 0.437213 |
| GPN3       | 7.14574 | 0.668893 |
| GPR108     | 8.49797 | 0.475272 |
| GPR114     | 5.51834 | 0.506305 |
| GPR155     | 5.68841 | 0.820622 |
| GPR160     | 10.3012 | 0.873707 |
| GPR75-ASB3 | 8.87764 | 0.604872 |
| GPR89A     | 8.35257 | 0.621802 |
| GPR89B     | 8.35257 | 0.621802 |
| GPRASP1    | 4.93145 | 1.26922  |
| GPRASP2    | 4.8676  | 0.721292 |
| GPRC5D     | 9.58581 | 1.4939   |
| GPS2       | 7.65444 | 0.461748 |
| GPSM3      | 7.39154 | 0.567268 |
| GPT2       | 5.40848 | 0.731487 |
| GPX1       | 9.83973 | 0.991587 |
| GPX3       | 5.02333 | 0.974235 |
| GPX4       | 10.1009 | 0.526755 |
| GPX7       | 7.38692 | 0.741469 |
| GRAMD1C    | 6.13027 | 1.35419  |
| GRASP      | 6.4615  | 0.465601 |
| GRHL1      | 5.49408 | 0.643526 |
| GRHPR      | 8.28538 | 0.45064  |
| GRINA      | 6.65144 | 0.537107 |
| GRK6       | 7.46924 | 0.500822 |
| GRN        | 8.57739 | 0.781254 |



|              |         |          |
|--------------|---------|----------|
| GRPEL1       | 7.45862 | 0.573465 |
| GRPEL2       | 4.88717 | 0.465939 |
| GS1-111G14.1 | 9.59777 | 0.627386 |
| GSAP         | 7.35599 | 0.866371 |
| GSE1         | 6.61994 | 0.410934 |
| GSKIP        | 8.01231 | 0.72679  |
| GSPT1        | 6.6717  | 0.507581 |
| GSPT2        | 6.50546 | 0.869957 |
| GSR          | 5.68623 | 0.539404 |
| GSS          | 6.89959 | 0.434454 |
| GSTA4        | 5.83982 | 0.965917 |
| GSTK1        | 8.82502 | 0.468059 |
| GSTM1        | 7.48663 | 0.677657 |
| GSTM2        | 7.99051 | 0.781554 |
| GSTM3        | 4.88351 | 0.77421  |
| GSTM4        | 5.06572 | 0.511179 |
| GSTO1        | 8.88609 | 0.706128 |
| GSTP1        | 8.86821 | 1.21629  |
| GSTT1        | 5.14382 | 0.721012 |
| GSTZ1        | 6.14818 | 0.573794 |
| GTF2A1       | 7.09029 | 0.4137   |
| GTF2A2       | 6.58796 | 0.438684 |
| GTF2B        | 8.38929 | 0.610487 |
| GTF2E1       | 6.70224 | 0.733244 |
| GTF2E2       | 7.4075  | 0.611634 |
| GTF2F1       | 7.03116 | 0.414824 |
| GTF2F2       | 6.27763 | 0.688369 |
| GTF2H1       | 5.70253 | 0.5513   |
| GTF2H2       | 7.13844 | 0.573914 |
| GTF2H2B      | 6.80172 | 0.574766 |
| GTF2H2C      | 7.90046 | 0.570876 |
| GTF2H2C_2    | 8.54117 | 0.579925 |
| GTF2H3       | 6.32451 | 0.58653  |
| GTF2H4       | 5.77077 | 0.54044  |
| GTF2I        | 8.51191 | 0.484721 |
| GTF2IP1      | 9.48927 | 0.501878 |
| GTF3A        | 9.09617 | 0.616446 |
| GTF3C3       | 5.19897 | 0.401698 |
| GTF3C6       | 9.65501 | 0.61702  |
| GTPBP6       | 7.23557 | 0.488869 |
| GTPBP8       | 6.07867 | 0.525141 |
| GTSF1        | 5.62057 | 2.04025  |
| GUCD1        | 7.79031 | 0.457155 |
| GUF1         | 4.95136 | 0.605986 |
| GUSBP11      | 7.17189 | 0.404983 |
| GUSBP3       | 5.98595 | 0.905579 |
| GUSBP9       | 6.10095 | 0.984453 |

|         |         |          |
|---------|---------|----------|
| GVINP1  | 5.38211 | 0.720251 |
| GXYLT1  | 5.31626 | 0.619019 |
| GYG1    | 9.47107 | 0.756148 |
| GYPC    | 9.58333 | 0.621304 |
| GYS1    | 6.74624 | 0.505131 |
| GZF1    | 6.23694 | 0.447965 |
| H1F0    | 6.38668 | 1.43295  |
| H1FX    | 10.4829 | 0.80632  |
| H2AFJ   | 6.51005 | 0.463076 |
| H2AFV   | 8.26786 | 0.502976 |
| H2AFY   | 6.58603 | 0.406809 |
| H2AFZ   | 10.804  | 0.535063 |
| H2BFS   | 10.9103 | 0.900827 |
| H3F3A   | 11.5213 | 0.408598 |
| H3F3AP4 | 12.3752 | 0.430135 |
| H3F3B   | 12.2389 | 0.440933 |
| HAB1    | 6.20905 | 0.402378 |
| HACL1   | 7.89204 | 0.568725 |
| HADH    | 6.46592 | 0.637934 |
| HADHB   | 8.77555 | 0.434193 |
| HAGH    | 8.07909 | 0.485505 |
| HARS    | 8.39635 | 0.470137 |
| HARS2   | 6.92263 | 0.492345 |
| HAT1    | 8.04681 | 0.705807 |
| HAUS1   | 6.92146 | 0.860028 |
| HAUS3   | 8.25841 | 0.867565 |
| HAUS4   | 6.62472 | 0.638197 |
| HAUS6   | 5.05236 | 0.72422  |
| HAUS7   | 5.21869 | 0.407488 |
| HBA1    | 8.91084 | 2.02695  |
| HBA2    | 8.91084 | 2.02695  |
| HBB     | 8.87642 | 1.42587  |
| HBD     | 7.54299 | 1.74072  |
| HBG1    | 6.57174 | 1.32946  |
| HBG2    | 6.57174 | 1.32946  |
| HBP1    | 6.47726 | 0.641013 |
| HBS1L   | 6.00227 | 0.608978 |
| HCCS    | 7.168   | 0.539281 |
| HCFC2   | 4.85094 | 0.437368 |
| HCG26   | 5.9569  | 0.472899 |
| HCK     | 5.07705 | 0.787325 |
| HCLS1   | 9.95068 | 0.475992 |
| HCP5    | 6.47497 | 0.953398 |
| HCST    | 6.1481  | 0.583972 |
| HDAC1   | 8.17343 | 0.571658 |
| HDAC9   | 4.89956 | 0.419056 |
| HDDC2   | 6.86133 | 0.51601  |

|          |         |          |
|----------|---------|----------|
| HDDC3    | 8.01632 | 0.442587 |
| HDGF     | 8.51745 | 0.643744 |
| HDHD1    | 7.02394 | 0.613802 |
| HDHD2    | 8.02303 | 0.648408 |
| HDHD3    | 5.95432 | 0.485191 |
| HDLBP    | 7.30163 | 0.435872 |
| HEATR1   | 5.5298  | 0.548259 |
| HEATR2   | 5.94326 | 0.40852  |
| HEATR3   | 5.40222 | 0.523153 |
| HEATR5A  | 5.11768 | 0.819654 |
| HEATR5B  | 5.03241 | 0.401009 |
| HEBP1    | 6.61418 | 1.00249  |
| HECA     | 7.28638 | 0.452841 |
| HECTD1   | 5.72439 | 0.476981 |
| HECTD3   | 6.1116  | 0.523858 |
| HEG1     | 4.96549 | 0.554124 |
| HEIH     | 8.5464  | 0.478775 |
| HELB     | 5.33466 | 0.460636 |
| HENMT1   | 6.53995 | 0.697189 |
| HERC1    | 5.09139 | 0.406683 |
| HERC2P2  | 8.81124 | 0.766158 |
| HERC2P9  | 8.81124 | 0.766158 |
| HERC5    | 7.98439 | 1.30138  |
| HERPUD1  | 9.60054 | 0.55641  |
| HERPUD2  | 7.44279 | 0.505601 |
| HES4     | 5.42359 | 0.506746 |
| HES6     | 4.95384 | 0.447959 |
| HESX1    | 4.92902 | 0.402706 |
| HEXB     | 10.4267 | 0.69964  |
| HEXIM1   | 6.96788 | 0.616265 |
| HEXIM2   | 5.83209 | 0.476811 |
| HEY1     | 6.65616 | 1.31756  |
| HEY2     | 6.82841 | 1.01319  |
| HGF      | 6.35678 | 1.7803   |
| HHIP-AS1 | 5.37851 | 0.538117 |
| HIAT1    | 8.89918 | 0.741038 |
| HIBADH   | 5.66875 | 0.435183 |
| HIBCH    | 6.72607 | 0.863173 |
| HID1     | 6.22699 | 0.512651 |
| HIF1A    | 7.35222 | 1.94062  |
| HIGD1A   | 7.73701 | 0.562332 |
| HIGD2A   | 8.76773 | 0.498476 |
| HILPDA   | 5.93117 | 0.496586 |
| HINFP    | 6.43122 | 0.519398 |
| HINT1    | 10.3556 | 0.496107 |
| HINT2    | 9.33094 | 0.400207 |
| HIPK2    | 7.40903 | 0.598871 |

|           |         |          |
|-----------|---------|----------|
| HIPK3     | 5.82666 | 0.41623  |
| HIST1H1C  | 11.502  | 1.15586  |
| HIST1H1D  | 8.20971 | 1.16095  |
| HIST1H1E  | 6.57827 | 1.09843  |
| HIST1H1T  | 6.02109 | 0.88815  |
| HIST1H2AB | 5.30181 | 0.730374 |
| HIST1H2AC | 10.6501 | 1.27331  |
| HIST1H2AD | 7.65604 | 1.37718  |
| HIST1H2AE | 8.726   | 1.84457  |
| HIST1H2AG | 7.03915 | 0.867757 |
| HIST1H2AH | 7.03915 | 0.867757 |
| HIST1H2AI | 7.03915 | 0.867757 |
| HIST1H2AJ | 8.82308 | 0.895574 |
| HIST1H2AK | 5.96822 | 0.633905 |
| HIST1H2AL | 6.2559  | 0.88357  |
| HIST1H2AM | 7.08264 | 1.10364  |
| HIST1H2BB | 5.87303 | 1.38265  |
| HIST1H2BC | 9.05889 | 1.24267  |
| HIST1H2BD | 10.3821 | 0.946622 |
| HIST1H2BE | 9.229   | 1.0677   |
| HIST1H2BF | 9.15146 | 1.13988  |
| HIST1H2BG | 9.53608 | 1.27927  |
| HIST1H2BH | 9.27268 | 0.917503 |
| HIST1H2BI | 9.15146 | 1.13988  |
| HIST1H2BJ | 8.15204 | 1.38317  |
| HIST1H2BK | 11.6653 | 0.834669 |
| HIST1H2BM | 5.14442 | 0.779388 |
| HIST1H2BN | 6.07094 | 0.667996 |
| HIST1H3A  | 5.71237 | 1.0401   |
| HIST1H3B  | 5.82373 | 1.02366  |
| HIST1H3C  | 5.90771 | 0.954464 |
| HIST1H3D  | 6.56008 | 1.11502  |
| HIST1H3E  | 5.24018 | 0.718055 |
| HIST1H3F  | 5.54721 | 0.969432 |
| HIST1H3G  | 6.37475 | 0.946415 |
| HIST1H3H  | 6.13947 | 1.14745  |
| HIST1H3I  | 5.48306 | 0.888071 |
| HIST1H3J  | 6.13947 | 1.14745  |
| HIST1H4A  | 6.69647 | 0.945315 |
| HIST1H4B  | 6.96988 | 0.966413 |
| HIST1H4C  | 6.96988 | 0.966413 |
| HIST1H4D  | 6.60214 | 0.937764 |
| HIST1H4E  | 6.98761 | 0.970531 |
| HIST1H4F  | 6.64513 | 0.974561 |
| HIST1H4H  | 6.94167 | 0.946555 |
| HIST1H4I  | 6.82807 | 0.832972 |
| HIST1H4J  | 7.08636 | 0.945266 |

|            |         |          |
|------------|---------|----------|
| HIST1H4K   | 6.96988 | 0.966413 |
| HIST1H4L   | 6.54918 | 0.825059 |
| HIST2H2AA3 | 12.222  | 1.09073  |
| HIST2H2AA4 | 12.222  | 1.09073  |
| HIST2H2BE  | 9.56707 | 1.52682  |
| HIST2H4A   | 6.96988 | 0.966413 |
| HIST2H4B   | 6.96988 | 0.966413 |
| HIST3H2A   | 5.82188 | 0.670271 |
| HIST4H4    | 6.96988 | 0.966413 |
| HIVEP1     | 5.23298 | 0.575055 |
| HJURP      | 5.24935 | 0.796634 |
| HK1        | 7.14786 | 0.636119 |
| HK2        | 5.00657 | 0.542225 |
| HK3        | 5.90232 | 0.543023 |
| HLA-A      | 12.8908 | 0.534297 |
| HLA-B      | 12.8045 | 0.65387  |
| HLA-C      | 12.5582 | 0.525635 |
| HLA-DMA    | 5.85603 | 1.43799  |
| HLA-DMB    | 6.44748 | 0.653153 |
| HLA-DOB    | 7.67099 | 0.847097 |
| HLA-DPA1   | 5.37861 | 1.11558  |
| HLA-DQB1   | 5.04868 | 0.564433 |
| HLA-DRA    | 6.74464 | 1.73066  |
| HLA-DRB1   | 5.72816 | 0.796336 |
| HLA-DRB4   | 4.97874 | 0.575399 |
| HLA-E      | 10.9785 | 0.537808 |
| HLA-F      | 9.43523 | 0.642635 |
| HLA-G      | 10.9582 | 0.496605 |
| HLA-J      | 10.663  | 0.618227 |
| HLTF       | 8.03192 | 0.869316 |
| HLX        | 5.33494 | 0.492727 |
| HMBOX1     | 5.98726 | 0.409447 |
| HMBS       | 7.91134 | 0.535464 |
| HMCES      | 7.46134 | 0.519709 |
| HMG20A     | 7.40088 | 0.738404 |
| HMGA1      | 6.66228 | 0.583008 |
| HMGA1P4    | 6.47826 | 0.418653 |
| HMGB1      | 10.0872 | 0.535895 |
| HMGB1P4    | 9.02182 | 0.457839 |
| HMGB2      | 7.59764 | 0.528818 |
| HMGB3      | 6.11327 | 0.94051  |
| HMGB3P1    | 5.56341 | 0.58942  |
| HMGCR      | 6.36282 | 0.69359  |
| HMGCS1     | 6.20886 | 0.526584 |
| HMGN1      | 10.5391 | 0.484806 |
| HMGN2      | 11.4977 | 0.524192 |
| HMGN3      | 10.6866 | 0.58985  |

|                |         |          |
|----------------|---------|----------|
| HMGN4          | 9.56625 | 0.553375 |
| HMGXB4         | 6.57613 | 0.530997 |
| HMMR           | 5.7866  | 1.2402   |
| HMOX1          | 5.63083 | 0.909903 |
| HMX1           | 6.64443 | 0.465289 |
| HN1            | 6.81062 | 0.732495 |
| HNRNPA0        | 7.38855 | 0.42727  |
| HNRNPA1        | 10.0499 | 0.412956 |
| HNRNPA1P3      | 8.96222 | 0.445585 |
| HNRNPA3        | 8.65961 | 0.503418 |
| HNRNPAB        | 9.40371 | 0.612988 |
| HNRNPF         | 7.82967 | 0.519034 |
| HNRNPH1        | 8.34795 | 0.775377 |
| HNRNPH2        | 8.23162 | 0.895592 |
| HNRNPL         | 7.78058 | 0.493532 |
| HNRNPLL        | 5.01614 | 0.42652  |
| HNRNPR         | 8.20617 | 0.460442 |
| HNRNPU         | 7.59104 | 0.507506 |
| HNRNPU-AS1     | 6.56799 | 1.10225  |
| HNRNPUL2-BSCL2 | 7.1483  | 0.403729 |
| HOMER1         | 6.39786 | 1.51617  |
| HOMER3         | 6.6819  | 0.9446   |
| HOOK1          | 5.89193 | 1.33505  |
| HOOK2          | 6.09304 | 0.50441  |
| HOXA6          | 5.32459 | 0.412628 |
| HOXC4          | 5.9982  | 0.571268 |
| HP             | 5.27472 | 0.680036 |
| HP1BP3         | 8.2566  | 0.407779 |
| HPCAL1         | 7.27033 | 0.573506 |
| HPRT1          | 5.44352 | 0.488223 |
| HPS3           | 5.68045 | 0.50155  |
| HPS5           | 6.64349 | 0.770036 |
| HRAS           | 6.32631 | 0.509455 |
| HRASLS2        | 5.60437 | 0.531564 |
| HRSP12         | 5.72263 | 0.401919 |
| HS2ST1         | 6.14176 | 0.807021 |
| HSBP1          | 7.84324 | 0.554743 |
| HSBP1L1        | 5.52422 | 0.711094 |
| HSCB           | 7.56099 | 0.555432 |
| HSD17B10       | 8.79855 | 0.537329 |
| HSD17B11       | 8.18291 | 0.921376 |
| HSD17B7        | 8.23781 | 0.425306 |
| HSD17B8        | 8.66566 | 0.601158 |
| HSD3B7         | 5.83282 | 0.482535 |
| HSDL1          | 5.44301 | 0.419857 |
| HSF2           | 4.86127 | 0.566388 |
| HSH2D          | 6.9196  | 0.868336 |

|            |         |          |
|------------|---------|----------|
| HSP90AA1   | 11.0907 | 0.565778 |
| HSP90AB1   | 10.7747 | 0.460299 |
| HSP90B1    | 11.4442 | 0.500212 |
| HSPA13     | 10.173  | 0.736189 |
| HSPA14     | 6.16502 | 0.466321 |
| HSPA1A     | 7.1768  | 1.49632  |
| HSPA1B     | 7.1768  | 1.49632  |
| HSPA1L     | 5.92029 | 0.545554 |
| HSPA4      | 7.19709 | 0.499619 |
| HSPA5      | 10.0601 | 0.597361 |
| HSPA6      | 5.74776 | 0.802231 |
| HSPA9      | 7.49743 | 0.409719 |
| HSPB1      | 9.59166 | 1.19165  |
| HSPB11     | 7.06695 | 0.551995 |
| HSPBAP1    | 6.36756 | 0.681104 |
| HSPBP1     | 6.97481 | 0.404692 |
| HSPD1      | 7.24997 | 0.427541 |
| HSPE1      | 8.94087 | 0.700597 |
| HSPE1-MOB4 | 8.31259 | 0.760818 |
| HSPH1      | 6.68389 | 0.628836 |
| HTATIP2    | 6.28981 | 0.471235 |
| HTATSF1    | 7.31098 | 0.668605 |
| HTRA2      | 7.54454 | 0.469889 |
| HVCN1      | 7.1502  | 0.732519 |
| HYI        | 6.98101 | 0.592904 |
| HYKK       | 5.62317 | 0.84784  |
| HYLS1      | 6.28077 | 0.954688 |
| HYOU1      | 10.5015 | 0.661829 |
| IARS       | 10.7845 | 0.5884   |
| IARS2      | 8.80057 | 0.693033 |
| IBTK       | 5.52991 | 0.504859 |
| ICAM1      | 6.11306 | 0.597898 |
| ICAM2      | 10.0007 | 0.628785 |
| ICAM3      | 10.3938 | 0.849756 |
| ICAM4      | 5.61853 | 1.4767   |
| ICE1       | 7.98148 | 0.584002 |
| ICE2       | 6.00859 | 0.540458 |
| ICT1       | 7.35861 | 0.59823  |
| ID1        | 7.28931 | 1.99484  |
| ID2        | 7.94142 | 1.48674  |
| ID2B       | 5.72726 | 0.918443 |
| ID3        | 6.26082 | 1.44019  |
| IDE        | 7.76156 | 0.572247 |
| IDH1       | 6.46374 | 0.639542 |
| IDH2       | 7.80607 | 0.685073 |
| IDH3A      | 7.11069 | 0.551339 |
| IDH3B      | 7.27368 | 0.41012  |

|                      |         |          |
|----------------------|---------|----------|
| IDH3G                | 7.84274 | 0.452266 |
| IDNK                 | 6.51389 | 0.475392 |
| IDS                  | 6.18776 | 0.558118 |
| IDUA                 | 6.27388 | 0.563202 |
| IER2                 | 11.3598 | 1.29504  |
| IER3                 | 7.55228 | 1.56579  |
| IER3IP1              | 8.14248 | 0.572595 |
| IER5                 | 10.0425 | 0.955028 |
| IFFO2                | 5.91297 | 0.690208 |
| IFI16                | 9.3488  | 0.839221 |
| IFI27                | 7.48572 | 2.48248  |
| IFI27L1              | 6.88362 | 0.441082 |
| IFI27L2              | 7.38412 | 0.451608 |
| IFI30                | 8.58705 | 1.25108  |
| IFI35                | 8.2407  | 0.757162 |
| IFI44                | 5.44742 | 1.49902  |
| IFI44L               | 5.4555  | 2.05623  |
| IFI6                 | 8.9132  | 1.75136  |
| IFIH1                | 5.68825 | 0.672895 |
| IFIT1                | 6.96787 | 1.92855  |
| IFIT3                | 6.73901 | 1.79181  |
| IFIT5                | 7.18247 | 0.971639 |
| IFITM1               | 10.7112 | 1.54902  |
| IFITM2               | 9.7317  | 1.25346  |
| IFITM3               | 9.70693 | 0.927792 |
| IFNAR1               | 6.76953 | 0.487754 |
| IFNAR2               | 8.47426 | 0.581605 |
| IFNGR1               | 7.88336 | 0.992693 |
| IFNGR2               | 8.84657 | 0.468788 |
| IFNLR1               | 6.46951 | 0.441327 |
| IFRD1                | 8.14325 | 1.03983  |
| IFRD2                | 7.91443 | 0.608086 |
| IFT172               | 5.24175 | 0.445572 |
| IFT20                | 8.88761 | 0.476193 |
| IFT22                | 4.9689  | 0.448543 |
| IFT46                | 6.50497 | 0.510194 |
| IFT57                | 6.56133 | 0.564402 |
| IFT80                | 5.65769 | 0.506371 |
| IFT88                | 5.14638 | 0.461603 |
| Ig alpha 1-[alpha]2m | 7.80379 | 2.97053  |
| IGBP1                | 9.219   | 0.545137 |
| IGF1                 | 7.18034 | 0.659504 |
| IGF2-AS              | 5.38461 | 0.436819 |
| IGF2R                | 7.08677 | 0.771185 |
| IGFALS               | 6.24923 | 0.471843 |
| IGFBP3               | 5.29976 | 0.636568 |
| IGFBP4               | 5.16323 | 0.42586  |



|              |         |          |
|--------------|---------|----------|
| IGFBP6       | 5.11061 | 0.431204 |
| IGFLR1       | 7.70725 | 0.632813 |
| IGH          | 6.6377  | 0.697453 |
| IGHA1        | 6.11154 | 0.638791 |
| IGHA2        | 6.64923 | 0.732158 |
| IGHD         | 6.04007 | 0.626763 |
| IGHD3-16     | 5.06673 | 0.458051 |
| IGHE         | 5.61536 | 0.870388 |
| IGHG1        | 5.86062 | 0.524207 |
| IGHG2        | 7.17735 | 0.858872 |
| IGHG3        | 6.44461 | 0.729891 |
| IGHG4        | 6.06781 | 0.755329 |
| IGHM         | 6.27834 | 0.630896 |
| IGHV3-23     | 6.2917  | 1.00077  |
| IGHV3-54     | 4.92529 | 0.620676 |
| IGHV4-31     | 6.37216 | 0.684804 |
| IGIP         | 5.72223 | 0.568285 |
| IGJ          | 12.3758 | 1.71627  |
| Igk          | 5.4913  | 0.485371 |
| IGK          | 9.47732 | 1.35529  |
| IGKC         | 8.72505 | 1.17921  |
| IGKV1-17     | 8.33304 | 2.24123  |
| IGKV1-37     | 9.09595 | 2.0304   |
| IGKV1-5      | 5.60575 | 0.586006 |
| IGKV1D-37    | 9.09595 | 2.0304   |
| IGKV1OR-1    | 9.55253 | 1.98032  |
| IGKV1OR10-1  | 9.55253 | 1.98032  |
| IGKV1OR2-108 | 9.81061 | 2.06433  |
| IGKV1OR2-2   | 9.55253 | 1.98032  |
| IGKV2-28     | 7.43906 | 2.08511  |
| IGKV2D-28    | 7.43906 | 2.08511  |
| IGKV4-1      | 8.10755 | 2.18565  |
| IGL@         | 5.60575 | 0.586006 |
| IGLC1        | 7.15174 | 0.798385 |
| IGLJ2        | 7.00311 | 1.29875  |
| IGLJ3        | 6.94613 | 1.08343  |
| IGLL3P       | 9.32588 | 1.0804   |
| IGLL5        | 7.81534 | 1.88201  |
| IGLV@        | 7.35844 | 1.34298  |
| IGLV1-36     | 6.78241 | 1.93477  |
| IGLV1-40     | 6.12663 | 0.973705 |
| IGLV1-44     | 7.10634 | 0.853136 |
| IGLV1-50     | 6.45452 | 1.35281  |
| IGLV2-14     | 7.60196 | 1.98727  |
| IGLV3-1      | 7.40294 | 1.41324  |
| IGLV3-10     | 7.42729 | 2.01388  |
| IGLV3-19     | 6.19823 | 0.866162 |

|             |         |          |
|-------------|---------|----------|
| IGLV3-25    | 6.4054  | 1.3249   |
| IGLV4-3     | 6.66341 | 0.457741 |
| IGLV4-60    | 5.14495 | 0.631487 |
| IGLV6-57    | 6.773   | 0.99672  |
| IGSF22      | 6.20053 | 0.436245 |
| IGSF8       | 6.32406 | 0.552757 |
| IK          | 7.48637 | 0.425819 |
| IKBKB       | 5.33638 | 0.452834 |
| IKZF3       | 6.94919 | 0.759598 |
| IKZF5       | 6.12048 | 0.515157 |
| IL10RA      | 5.96512 | 1.21241  |
| IL10RB      | 7.50108 | 0.54292  |
| IL12A       | 5.2767  | 0.716049 |
| IL13RA1     | 4.818   | 0.980208 |
| IL15        | 5.87892 | 1.09253  |
| IL15RA      | 6.94572 | 0.504388 |
| IL16        | 6.70214 | 0.617693 |
| IL17RA      | 5.88769 | 0.400004 |
| IL17RB      | 4.89357 | 0.679555 |
| IL18RAP     | 5.00576 | 0.639672 |
| IL27RA      | 5.57771 | 0.651822 |
| IL2RB       | 5.51341 | 0.477812 |
| IL2RG       | 9.69964 | 1.258    |
| IL32        | 4.93417 | 0.959813 |
| IL4R        | 5.07778 | 0.522297 |
| IL5RA       | 5.54901 | 0.902748 |
| IL6         | 4.89597 | 1.11419  |
| IL6R        | 6.95571 | 1.31262  |
| IL6ST       | 7.15519 | 0.658686 |
| ILF2        | 9.21441 | 0.67652  |
| ILF3        | 7.6232  | 0.468775 |
| ILF3-AS1    | 6.7622  | 0.808066 |
| ILK         | 6.88268 | 0.473356 |
| IMMP1L      | 6.05802 | 0.610598 |
| IMMP2L      | 6.16817 | 0.669385 |
| IMMT        | 8.12316 | 0.472168 |
| IMP3        | 8.54505 | 0.697998 |
| IMP4        | 8.91757 | 0.520477 |
| IMPA1       | 8.02181 | 0.714642 |
| IMPA2       | 5.79182 | 0.821344 |
| IMPACT      | 5.50287 | 0.823263 |
| IMPAD1      | 6.32805 | 0.412621 |
| IMPDH1      | 6.76244 | 0.425017 |
| IMPDH2      | 9.87489 | 0.856236 |
| ING2        | 5.63178 | 0.438135 |
| ING3        | 6.14488 | 0.407823 |
| INO80B-WBP1 | 6.94489 | 0.406241 |

|              |         |          |
|--------------|---------|----------|
| INO80E       | 6.6097  | 0.470132 |
| INPP1        | 6.85212 | 0.716297 |
| INPP4A       | 7.15726 | 0.483845 |
| INPP5A       | 5.01437 | 0.41721  |
| INPP5D       | 5.30047 | 0.437039 |
| INPP5E       | 7.06134 | 0.505689 |
| INSIG1       | 6.66748 | 0.869327 |
| INSIG2       | 7.29429 | 0.760994 |
| INSR         | 6.44416 | 0.586549 |
| INTS12       | 7.95751 | 0.496863 |
| INTS2        | 4.98707 | 0.80759  |
| INTS5        | 6.74876 | 0.47504  |
| INTS6        | 5.20108 | 0.463138 |
| INTS6-AS1    | 4.98234 | 0.42143  |
| INTS8        | 8.6852  | 0.554106 |
| IP6K2        | 7.582   | 0.473207 |
| IPO11-LRRC70 | 5.642   | 0.659267 |
| IPO4         | 7.51982 | 0.506295 |
| IPO5         | 6.49428 | 0.539995 |
| IPO7         | 8.752   | 0.659361 |
| IPO8         | 6.80337 | 0.43002  |
| IQCB1        | 8.40187 | 0.613828 |
| IQCH-AS1     | 6.56914 | 0.615379 |
| IQGAP1       | 8.19553 | 0.611095 |
| IQGAP2       | 5.87065 | 1.08298  |
| IQSEC1       | 7.11882 | 0.584197 |
| IRAK1        | 8.21106 | 0.504635 |
| IRAK4        | 6.58655 | 0.41859  |
| IREB2        | 5.3795  | 0.464432 |
| IRF1         | 8.50921 | 0.91957  |
| IRF2         | 6.99106 | 0.91082  |
| IRF2BP2      | 7.86102 | 0.656308 |
| IRF2BPL      | 7.8202  | 0.84619  |
| IRF3         | 8.39179 | 0.457743 |
| IRF4         | 7.38064 | 0.709952 |
| IRF5         | 6.3009  | 0.450756 |
| IRF7         | 7.85226 | 0.836556 |
| IRF8         | 5.2818  | 0.519526 |
| IRF9         | 7.05536 | 0.512796 |
| IRS1         | 4.96641 | 0.603065 |
| IRS2         | 5.57771 | 1.11621  |
| ISCA1        | 8.43089 | 0.57776  |
| ISCA2        | 7.54274 | 0.661762 |
| ISCU         | 11.4867 | 0.577444 |
| ISG15        | 9.3466  | 1.6513   |
| ISG20        | 10.7562 | 0.764701 |
| ISG20L2      | 5.96388 | 0.423572 |

|            |         |          |
|------------|---------|----------|
| ISL2       | 6.53352 | 1.46803  |
| ISLR       | 5.22423 | 1.19039  |
| ISOC1      | 7.98958 | 0.659158 |
| ISOC2      | 6.99282 | 0.450217 |
| ISY1-RAB43 | 6.41469 | 0.449713 |
| ITCH       | 6.06666 | 0.465239 |
| ITGA3      | 5.72508 | 0.448099 |
| ITGA4      | 8.89582 | 0.91782  |
| ITGA6      | 7.61638 | 1.18834  |
| ITGA8      | 6.91835 | 1.16671  |
| ITGAE      | 8.93604 | 0.61589  |
| ITGAL      | 6.42023 | 0.922512 |
| ITGAV      | 7.42366 | 0.71491  |
| ITGB1      | 4.86054 | 0.543956 |
| ITGB2      | 4.9997  | 0.68044  |
| ITGB3BP    | 7.87725 | 0.742438 |
| ITGB7      | 8.35823 | 1.3356   |
| ITM2A      | 9.32649 | 1.40987  |
| ITM2B      | 11.1489 | 0.619589 |
| ITM2C      | 11.1861 | 1.12623  |
| ITPR2      | 5.78765 | 0.452572 |
| ITPRIP     | 7.20432 | 1.01925  |
| IVNS1ABP   | 6.14646 | 0.577855 |
| IZUMO4     | 5.97128 | 0.567005 |
| JADE1      | 6.97898 | 0.546384 |
| JADE2      | 5.87566 | 0.49965  |
| JAG1       | 5.54633 | 0.497951 |
| JAGN1      | 8.39348 | 0.476132 |
| JAK1       | 6.7677  | 0.616264 |
| JAK2       | 5.74027 | 0.660369 |
| JAZF1      | 4.98674 | 0.855134 |
| JDP2       | 5.46851 | 0.45532  |
| JHDM1D-AS1 | 5.27969 | 0.447918 |
| JKAMP      | 7.38166 | 0.580526 |
| JMJD1C     | 6.41722 | 0.594613 |
| JMJD7      | 6.43124 | 0.43058  |
| JMJD8      | 7.25086 | 0.436859 |
| JMY        | 8.19706 | 0.925918 |
| JOSD1      | 7.78912 | 0.526965 |
| JOSD2      | 6.08777 | 0.459722 |
| JRKL       | 5.78891 | 0.402722 |
| JSRP1      | 6.33299 | 0.876958 |
| JTB        | 11.761  | 0.43239  |
| JUN        | 10.6044 | 0.804857 |
| JUNB       | 9.82046 | 1.02031  |
| JUND       | 8.23058 | 0.599253 |
| KANSL1     | 7.43965 | 0.67758  |

|            |         |          |
|------------|---------|----------|
| KANSL1-AS1 | 5.34429 | 0.683296 |
| KANSL2     | 6.89336 | 0.51572  |
| KARS       | 10.3632 | 0.467087 |
| KAT2A      | 7.6153  | 0.502111 |
| KAT2B      | 7.95002 | 0.732502 |
| KAT5       | 7.30991 | 0.419395 |
| KAT6B      | 6.85498 | 0.52001  |
| KAT7       | 6.42438 | 0.445716 |
| KATNA1     | 5.95037 | 0.598242 |
| KATNBL1    | 5.45419 | 0.477214 |
| KBTBD2     | 6.54151 | 0.510806 |
| KBTBD3     | 6.01125 | 0.549184 |
| KBTBD4     | 6.30988 | 0.524782 |
| KBTBD8     | 7.43328 | 1.01991  |
| KCNA3      | 7.68056 | 0.833291 |
| KCNA5      | 5.00548 | 1.00697  |
| KCNF1      | 6.39974 | 0.504146 |
| KCNG2      | 4.87091 | 0.534209 |
| KCNH2      | 5.84299 | 0.777287 |
| KCNH3      | 5.66909 | 0.439214 |
| KCNK12     | 6.21032 | 1.02525  |
| KCNK6      | 6.04618 | 0.66567  |
| KCNK9      | 5.15725 | 0.525487 |
| KCNMB3     | 5.12348 | 0.679565 |
| KCNN3      | 6.75646 | 0.858021 |
| KCNN4      | 6.09885 | 1.01297  |
| KCNQ1      | 6.67085 | 0.565485 |
| KCNQ1DN    | 5.67134 | 0.426506 |
| KCNS1      | 5.74594 | 0.406659 |
| KCNS3      | 6.64307 | 2.24954  |
| KCTD1      | 5.10101 | 0.407064 |
| KCTD12     | 5.08046 | 1.46872  |
| KCTD13     | 5.29451 | 0.447548 |
| KCTD20     | 7.24711 | 0.565544 |
| KCTD21     | 4.93319 | 0.525341 |
| KCTD3      | 5.50867 | 0.94904  |
| KCTD6      | 5.86676 | 0.520558 |
| KCTD9      | 4.89313 | 0.840963 |
| KDELC2     | 6.58957 | 0.83027  |
| KDELR1     | 9.16515 | 0.603707 |
| KDELR2     | 8.94225 | 0.634975 |
| KDELR3     | 6.94295 | 1.30899  |
| KDM1A      | 7.13397 | 0.408923 |
| KDM2B      | 6.39225 | 0.578186 |
| KDM3B      | 7.51963 | 0.568763 |
| KDM4C      | 5.7907  | 0.504855 |
| KDM5A      | 5.32848 | 0.412102 |

|           |         |          |
|-----------|---------|----------|
| KDM5B     | 5.03536 | 0.444097 |
| KDM5D     | 6.22018 | 2.37413  |
| KDM6A     | 5.09336 | 0.605168 |
| KDM6B     | 6.00663 | 0.408263 |
| KDM7A     | 5.88806 | 0.739188 |
| KEAP1     | 7.17217 | 0.627724 |
| KHNYN     | 7.16885 | 0.463597 |
| KIAA0040  | 7.48387 | 0.644002 |
| KIAA0101  | 6.41297 | 1.05257  |
| KIAA0125  | 6.81072 | 2.03222  |
| KIAA0196  | 7.31021 | 0.55248  |
| KIAA0232  | 5.51716 | 0.430273 |
| KIAA0247  | 7.77313 | 0.665088 |
| KIAA0355  | 6.04135 | 0.490954 |
| KIAA0430  | 5.48881 | 0.482362 |
| KIAA0513  | 5.34146 | 0.42974  |
| KIAA0753  | 6.19831 | 0.405562 |
| KIAA0907  | 7.23171 | 0.731997 |
| KIAA0930  | 6.39345 | 0.502069 |
| KIAA1024  | 4.97154 | 0.423907 |
| KIAA1033  | 8.10852 | 0.590764 |
| KIAA1143  | 8.26469 | 0.604278 |
| KIAA1147  | 6.61324 | 0.580888 |
| KIAA1191  | 8.81455 | 0.544485 |
| KIAA1217  | 6.13302 | 0.919538 |
| KIAA1279  | 6.13579 | 0.879132 |
| KIAA1324L | 5.19772 | 0.679263 |
| KIAA1407  | 5.49667 | 0.867353 |
| KIAA1432  | 6.13658 | 0.429146 |
| KIAA1468  | 6.91936 | 0.602769 |
| KIAA1551  | 7.04943 | 0.879244 |
| KIAA1715  | 5.45037 | 0.513993 |
| KIAA1731  | 5.38012 | 0.414808 |
| KIAA1804  | 5.03583 | 0.831991 |
| KIF12     | 5.92496 | 0.436583 |
| KIF13B    | 6.59235 | 0.57972  |
| KIF18B    | 5.37295 | 0.782922 |
| KIF21A    | 5.57404 | 0.713442 |
| KIF21B    | 6.18012 | 1.01124  |
| KIF22     | 5.7866  | 0.507372 |
| KIF2A     | 6.46255 | 0.68497  |
| KIF2C     | 5.38524 | 0.646881 |
| KIF3A     | 5.07968 | 0.640879 |
| KIF3B     | 6.95741 | 0.462691 |
| KIF4A     | 4.92458 | 0.895394 |
| KIFAP3    | 7.25254 | 0.74643  |
| KIFC1     | 6.53559 | 0.461665 |

|           |         |          |
|-----------|---------|----------|
| KIFC2     | 6.39625 | 0.414861 |
| KISS1R    | 5.70486 | 1.52352  |
| KIT       | 6.63767 | 2.09189  |
| KIZ       | 6.27996 | 0.45587  |
| KLC2      | 6.40415 | 0.491719 |
| KLF10     | 9.45212 | 1.11781  |
| KLF11     | 5.27546 | 0.821626 |
| KLF2      | 8.86617 | 0.900146 |
| KLF3      | 6.18402 | 0.833078 |
| KLF4      | 6.4399  | 1.86899  |
| KLF5      | 4.99707 | 0.983805 |
| KLF6      | 9.87726 | 1.32231  |
| KLF7      | 5.06851 | 0.741561 |
| KLF9      | 5.6331  | 0.745817 |
| KLHDC2    | 8.86052 | 0.51115  |
| KLHDC3    | 7.01126 | 0.437978 |
| KLHDC7B   | 5.67281 | 0.566625 |
| KLHDC8A   | 5.08017 | 0.432525 |
| KLHDC8B   | 5.36556 | 0.402293 |
| KLHDC9    | 6.50699 | 0.700562 |
| KLHL12    | 6.39939 | 0.543365 |
| KLHL14    | 4.83695 | 0.969106 |
| KLHL15    | 6.98393 | 0.758958 |
| KLHL2     | 5.55162 | 0.710861 |
| KLHL20    | 5.75338 | 0.463751 |
| KLHL21    | 6.00974 | 0.592916 |
| KLHL24    | 6.70442 | 0.631827 |
| KLHL26    | 5.49659 | 0.425844 |
| KLHL28    | 5.98647 | 0.564201 |
| KLHL42    | 6.04864 | 0.665989 |
| KLHL5     | 6.42834 | 1.00288  |
| KLHL6     | 7.76119 | 0.799883 |
| KLHL7     | 5.61665 | 0.622801 |
| KLHL8     | 5.58566 | 0.523063 |
| KMO       | 5.31436 | 0.954393 |
| KMT2A     | 5.92624 | 0.515913 |
| KMT2C     | 6.18767 | 0.437912 |
| KMT2E     | 8.14581 | 0.60646  |
| KMT2E-AS1 | 6.39974 | 0.408221 |
| KNSTRN    | 6.53715 | 0.779475 |
| KNTC1     | 7.57051 | 0.857192 |
| KPNA1     | 5.97364 | 0.454479 |
| KPNA2     | 8.74028 | 0.814177 |
| KPNA3     | 6.58218 | 0.667501 |
| KPNA4     | 6.17403 | 0.440915 |
| KPNA5     | 5.40075 | 0.624324 |
| KPNB1     | 7.54991 | 0.543239 |

|           |         |          |
|-----------|---------|----------|
| KPTN      | 6.39007 | 0.430487 |
| KRAS      | 7.0457  | 0.427597 |
| KRBOX4    | 4.93568 | 0.463649 |
| KRCC1     | 7.24057 | 0.773784 |
| KRI1      | 6.37557 | 0.407658 |
| KRIT1     | 6.36273 | 0.4313   |
| KRT10     | 8.9978  | 0.633674 |
| KRT18     | 5.87096 | 0.975865 |
| KRT81     | 5.54405 | 0.409574 |
| KRT8P11   | 5.57571 | 0.405663 |
| KRTCAP3   | 5.05221 | 0.521347 |
| KTI12     | 5.94727 | 0.666274 |
| KTN1      | 9.34674 | 0.592688 |
| L3HYPDH   | 5.41685 | 0.653772 |
| LACTB     | 5.79187 | 0.698627 |
| LACTB2    | 7.16871 | 0.985704 |
| LAG3      | 5.04216 | 0.955475 |
| LAGE3     | 7.93708 | 0.663497 |
| LAIR1     | 5.44307 | 0.538571 |
| LAIR2     | 4.93093 | 0.416265 |
| LAMA5     | 6.14243 | 0.703654 |
| LAMA5-AS1 | 6.09786 | 0.593131 |
| LAMC1     | 7.97442 | 0.892915 |
| LAMP1     | 7.78373 | 0.580461 |
| LAMP2     | 7.7871  | 0.649214 |
| LAMP3     | 8.16218 | 1.48885  |
| LAMP5     | 9.43903 | 2.82095  |
| LAMTOR1   | 9.01813 | 0.424427 |
| LAMTOR2   | 8.11039 | 0.650338 |
| LAMTOR3   | 6.49019 | 0.615212 |
| LAMTOR4   | 8.30165 | 0.453683 |
| LAMTOR5   | 9.06021 | 0.427657 |
| LANCL1    | 7.203   | 0.454537 |
| LAP3      | 9.68917 | 0.702612 |
| LAPTM4A   | 10.7537 | 0.47704  |
| LAPTM4B   | 6.41461 | 1.84536  |
| LAPTM5    | 8.52555 | 2.30964  |
| LARP1B    | 6.17966 | 0.527547 |
| LARP4     | 6.55792 | 0.537053 |
| LARS      | 8.06102 | 0.48417  |
| LARS2     | 5.10762 | 0.549527 |
| LASP1     | 8.08707 | 0.567707 |
| LAT2      | 6.17009 | 0.664211 |
| LATS2     | 5.67821 | 0.64502  |
| LAX1      | 9.42415 | 0.985531 |
| LBH       | 4.87676 | 0.752372 |
| LBR       | 8.02028 | 0.958068 |



|          |         |          |
|----------|---------|----------|
| LCLAT1   | 6.48359 | 0.766049 |
| LCMT1    | 7.91959 | 0.432767 |
| LCMT2    | 5.60552 | 0.481849 |
| LCN2     | 5.89219 | 1.16197  |
| LCOR     | 6.97626 | 0.742393 |
| LCORL    | 7.05236 | 0.697109 |
| LCP1     | 7.22849 | 1.54079  |
| LDHA     | 11.4694 | 0.676154 |
| LDHB     | 11.6603 | 0.579678 |
| LDLR     | 5.49584 | 0.567432 |
| LDLRAD4  | 5.14827 | 0.494138 |
| LDLRAP1  | 7.31959 | 0.563727 |
| LDOC1    | 5.03477 | 1.02587  |
| LDOC1L   | 5.34326 | 0.865915 |
| LEAP2    | 5.79986 | 0.493289 |
| LEMD2    | 5.4839  | 0.432728 |
| LEMD3    | 9.14723 | 0.477576 |
| LENG8    | 6.55789 | 0.851352 |
| LEO1     | 5.93789 | 0.793194 |
| LEPREL1  | 5.34445 | 0.615376 |
| LEPREL2  | 5.52847 | 0.446652 |
| LEPREL4  | 5.22336 | 0.475244 |
| LEPROTL1 | 6.59217 | 0.54264  |
| LETMD1   | 8.07775 | 0.631221 |
| LGALS1   | 10.3177 | 0.993801 |
| LGALS3   | 6.32764 | 0.631742 |
| LGALS3BP | 6.28366 | 1.23984  |
| LGALS8   | 5.50601 | 0.719271 |
| LGALS9   | 6.50483 | 0.539805 |
| LGALSL   | 6.22397 | 0.637469 |
| LGMN     | 6.5571  | 1.27724  |
| LHFPL2   | 5.19302 | 0.680763 |
| LHPP     | 5.85693 | 0.577793 |
| LHX4-AS1 | 5.05361 | 0.451614 |
| LIAS     | 5.35954 | 0.62564  |
| LIG1     | 7.00165 | 0.465791 |
| LIG4     | 4.94397 | 0.535721 |
| LILRA2   | 4.82586 | 0.432002 |
| LILRA3   | 4.91459 | 0.494077 |
| LILRA4   | 5.44414 | 0.439982 |
| LILRB1   | 6.86034 | 0.805401 |
| LILRB3   | 6.87826 | 0.421199 |
| LIMD1    | 5.86331 | 0.407773 |
| LIMD2    | 6.12597 | 0.565375 |
| LIME1    | 7.50897 | 0.527417 |
| LIMS1    | 5.59066 | 0.419771 |
| LIMS2    | 6.10144 | 0.458135 |

|           |         |          |
|-----------|---------|----------|
| LIMS3     | 6.02113 | 0.556267 |
| LIMS3L    | 6.62914 | 0.581755 |
| LIN52     | 6.75092 | 0.593101 |
| LIN7C     | 7.93285 | 0.632268 |
| LINC-PINT | 6.97796 | 0.568107 |
| LINC00094 | 5.65216 | 0.692029 |
| LINC00115 | 4.84862 | 0.590807 |
| LINC00116 | 6.13525 | 0.794362 |
| LINC00152 | 7.6673  | 0.865069 |
| LINC00263 | 5.00326 | 0.450312 |
| LINC00294 | 6.58973 | 0.607736 |
| LINC00324 | 6.317   | 0.877677 |
| LINC00339 | 6.58119 | 0.824669 |
| LINC00341 | 7.80041 | 1.10294  |
| LINC00342 | 7.7965  | 0.575247 |
| LINC00467 | 7.06181 | 0.842393 |
| LINC00482 | 6.20454 | 0.411697 |
| LINC00493 | 10.0174 | 0.567907 |
| LINC00494 | 5.85823 | 0.720446 |
| LINC00520 | 7.21429 | 0.433789 |
| LINC00525 | 6.26912 | 1.74225  |
| LINC00526 | 6.15628 | 0.52586  |
| LINC00528 | 6.00701 | 0.739833 |
| LINC00537 | 7.05613 | 0.647231 |
| LINC00582 | 8.1534  | 1.1079   |
| LINC00621 | 8.43651 | 0.687507 |
| LINC00623 | 8.71927 | 0.775727 |
| LINC00657 | 9.05782 | 0.724852 |
| LINC00667 | 5.95671 | 0.422715 |
| LINC00685 | 5.04789 | 0.422375 |
| LINC00847 | 6.91205 | 0.62875  |
| LINC00849 | 5.75042 | 0.707323 |
| LINC00869 | 5.71171 | 0.4832   |
| LINC00886 | 5.45627 | 0.467004 |
| LINC00888 | 8.06206 | 0.634772 |
| LINC00893 | 4.95192 | 0.638509 |
| LINC00909 | 6.75966 | 0.749965 |
| LINC00936 | 7.66494 | 1.15686  |
| LINC00938 | 5.78729 | 0.504928 |
| LINC00959 | 5.85803 | 0.663723 |
| LINC00969 | 6.23618 | 0.511644 |
| LINC00984 | 6.69608 | 0.683963 |
| LINC00992 | 5.21743 | 1.05035  |
| LINC00998 | 6.545   | 0.595638 |
| LINC01000 | 6.9544  | 0.532305 |
| LINC01001 | 5.79212 | 0.493729 |
| LINC01002 | 7.0353  | 0.745539 |

|                   |         |          |
|-------------------|---------|----------|
| LINC01003         | 6.82606 | 0.95969  |
| LINC01023         | 5.70528 | 0.555372 |
| LINC01061         | 5.1162  | 0.536895 |
| LINC01125         | 5.24944 | 0.455255 |
| LINC01126         | 4.91492 | 0.474082 |
| LINC01296         | 5.04926 | 0.885677 |
| LINC01410         | 6.44538 | 0.965768 |
| LINC01420         | 7.11266 | 0.545263 |
| LINS              | 5.9365  | 0.578272 |
| LIPT1             | 6.60126 | 0.780035 |
| LITAF             | 6.96651 | 0.477661 |
| LIX1L             | 6.02557 | 0.607971 |
| LL22NC03-N14H11.1 | 6.43517 | 0.939656 |
| LL22NC03-N64E9.1  | 6.10777 | 2.2316   |
| LLGL2             | 5.5237  | 0.421699 |
| LLPH              | 5.3214  | 0.415432 |
| LMAN1             | 9.06362 | 0.732724 |
| LMAN2L            | 6.70809 | 0.449901 |
| LMBRD1            | 6.6869  | 0.487961 |
| LMBRD2            | 5.47845 | 0.443085 |
| LMF1              | 5.55399 | 0.431401 |
| LMNA              | 6.7582  | 0.520746 |
| LMNB1             | 5.82257 | 0.857043 |
| LMNB2             | 6.44667 | 0.553166 |
| LMO4              | 6.07236 | 0.544821 |
| LNP1              | 7.11889 | 0.606521 |
| LNPEP             | 5.71754 | 0.445482 |
| LNX2              | 5.61945 | 0.431527 |
| LOC100049716      | 4.8613  | 0.403239 |
| LOC100093631      | 9.48927 | 0.501878 |
| LOC100127972      | 4.85428 | 0.728712 |
| LOC100128325      | 5.32126 | 0.532742 |
| LOC100129034      | 5.71613 | 0.423778 |
| LOC100129518      | 5.69226 | 0.632845 |
| LOC100129550      | 5.46908 | 0.644973 |
| LOC100129924      | 6.18987 | 0.416191 |
| LOC100130093      | 7.65759 | 0.630506 |
| LOC100130429      | 6.07891 | 0.556013 |
| LOC100130872      | 5.66894 | 0.431773 |
| LOC100131043      | 6.85233 | 0.82483  |
| LOC100131541      | 5.05148 | 0.941227 |
| LOC100131564      | 7.44178 | 0.446162 |
| LOC100132062      | 7.0353  | 0.745539 |
| LOC100132167      | 5.24533 | 0.419349 |
| LOC100132352      | 6.15596 | 0.623982 |
| LOC100132354      | 5.56359 | 0.446506 |
| LOC100132705      | 5.68224 | 0.426046 |

|              |         |          |
|--------------|---------|----------|
| LOC100133130 | 6.49641 | 0.451534 |
| LOC100133182 | 7.0353  | 0.745539 |
| LOC100133315 | 5.21219 | 0.697266 |
| LOC100133331 | 7.0353  | 0.745539 |
| LOC100134091 | 5.90969 | 0.671481 |
| LOC100134937 | 4.80578 | 0.480201 |
| LOC100147773 | 5.11507 | 0.676982 |
| LOC100190986 | 7.82975 | 0.813682 |
| LOC100233156 | 6.78521 | 0.531095 |
| LOC100270804 | 6.46871 | 0.65649  |
| LOC100272216 | 7.85894 | 0.898312 |
| LOC100287497 | 5.81775 | 0.89164  |
| LOC100287852 | 8.34869 | 0.417132 |
| LOC100288152 | 6.05164 | 0.612298 |
| LOC100288974 | 4.9008  | 0.421455 |
| LOC100289019 | 6.16368 | 0.608984 |
| LOC100289092 | 5.32209 | 0.436263 |
| LOC100289097 | 6.49167 | 0.465221 |
| LOC100289098 | 7.22635 | 0.607739 |
| LOC100289333 | 6.78007 | 0.479168 |
| LOC100289361 | 6.28101 | 0.597809 |
| LOC100310756 | 6.30116 | 0.502823 |
| LOC100505478 | 5.78225 | 0.403921 |
| LOC100505650 | 5.18398 | 0.788912 |
| LOC100505715 | 6.22929 | 0.722843 |
| LOC100505812 | 5.22656 | 0.684059 |
| LOC100505915 | 5.63107 | 0.472108 |
| LOC100506076 | 7.78973 | 0.820894 |
| LOC100506098 | 7.07093 | 1.01641  |
| LOC100506100 | 6.52063 | 0.683971 |
| LOC100506123 | 7.78973 | 0.820894 |
| LOC100506248 | 11.4907 | 0.452525 |
| LOC100506302 | 6.01842 | 0.639908 |
| LOC100506325 | 5.3958  | 0.443353 |
| LOC100506473 | 6.10602 | 0.526361 |
| LOC100506548 | 6.25549 | 0.77898  |
| LOC100506797 | 5.00405 | 0.447027 |
| LOC100506844 | 5.06457 | 0.478474 |
| LOC100506922 | 5.9893  | 0.874538 |
| LOC100506990 | 5.36332 | 0.613468 |
| LOC100507006 | 7.34682 | 0.794665 |
| LOC100507022 | 4.98566 | 0.523336 |
| LOC100507217 | 5.8734  | 0.558037 |
| LOC100507431 | 4.83813 | 0.660165 |
| LOC100507487 | 4.96049 | 0.540344 |
| LOC100507535 | 7.74712 | 0.762077 |
| LOC100507577 | 6.50883 | 0.484843 |

|              |         |          |
|--------------|---------|----------|
| LOC100507670 | 5.6452  | 0.42755  |
| LOC100509445 | 7.89465 | 1.80851  |
| LOC100653061 | 5.22682 | 0.433652 |
| LOC100653149 | 5.21019 | 0.664532 |
| LOC100653247 | 9.2656  | 0.834441 |
| LOC100996332 | 6.22167 | 0.40505  |
| LOC100996412 | 6.71573 | 1.15393  |
| LOC100996425 | 5.83723 | 0.407257 |
| LOC100996517 | 7.83898 | 0.64251  |
| LOC100996579 | 5.25191 | 0.648022 |
| LOC100996643 | 5.39179 | 0.423138 |
| LOC100996668 | 5.43129 | 0.465939 |
| LOC100996696 | 10.6601 | 0.707292 |
| LOC100996717 | 7.3831  | 1.26053  |
| LOC100996724 | 5.77941 | 0.459395 |
| LOC100996732 | 5.3104  | 0.591297 |
| LOC100996735 | 5.3104  | 0.591297 |
| LOC100996740 | 8.27248 | 1.06105  |
| LOC100996741 | 5.73898 | 0.834982 |
| LOC100996747 | 11.8815 | 0.696551 |
| LOC100996756 | 8.53662 | 1.38235  |
| LOC100996761 | 5.85355 | 0.521299 |
| LOC100996763 | 7.3831  | 1.26053  |
| LOC100996792 | 6.7227  | 0.585743 |
| LOC100996809 | 5.32188 | 0.754632 |
| LOC101059949 | 5.84505 | 1.3368   |
| LOC101060275 | 7.92019 | 0.693349 |
| LOC101060321 | 7.00544 | 0.473434 |
| LOC101060351 | 7.00544 | 0.473434 |
| LOC101060363 | 10.4416 | 0.46016  |
| LOC101060373 | 10.0789 | 0.712953 |
| LOC101060376 | 7.00544 | 0.473434 |
| LOC101060386 | 6.20894 | 0.650432 |
| LOC101060389 | 7.00544 | 0.473434 |
| LOC101060399 | 7.91905 | 0.577176 |
| LOC101060405 | 6.63413 | 0.508255 |
| LOC101060443 | 4.97523 | 0.47712  |
| LOC101060510 | 4.98706 | 0.511078 |
| LOC101060578 | 8.92557 | 0.638545 |
| LOC101060596 | 5.98226 | 0.909193 |
| LOC101060604 | 5.36874 | 0.4194   |
| LOC101060632 | 5.84505 | 1.3368   |
| LOC101060691 | 4.92277 | 0.411168 |
| LOC101060817 | 7.74551 | 0.746718 |
| LOC101060835 | 5.2343  | 0.678956 |
| LOC101243545 | 8.45735 | 0.608232 |
| LOC101926963 | 5.84288 | 0.491742 |

|              |         |          |
|--------------|---------|----------|
| LOC101927144 | 7.69582 | 0.848563 |
| LOC101927178 | 6.07812 | 0.581604 |
| LOC101927180 | 9.38528 | 0.449613 |
| LOC101927184 | 4.96049 | 0.540344 |
| LOC101927204 | 5.17955 | 0.560984 |
| LOC101927266 | 5.76082 | 0.40971  |
| LOC101927268 | 4.92715 | 0.740188 |
| LOC101927330 | 5.51473 | 0.668761 |
| LOC101927345 | 5.84505 | 1.3368   |
| LOC101927420 | 5.43818 | 0.427327 |
| LOC101927451 | 6.20333 | 0.895913 |
| LOC101927507 | 5.26452 | 0.430629 |
| LOC101927705 | 4.97225 | 0.630744 |
| LOC101927733 | 10.4668 | 0.510542 |
| LOC101927811 | 6.44125 | 1.16419  |
| LOC101927933 | 5.4352  | 0.442148 |
| LOC101927974 | 5.34812 | 0.464343 |
| LOC101928000 | 7.31069 | 0.584115 |
| LOC101928061 | 9.82688 | 0.446511 |
| LOC101928099 | 4.89199 | 0.404346 |
| LOC101928102 | 5.56787 | 1.12245  |
| LOC101928111 | 4.88289 | 0.419556 |
| LOC101928143 | 5.31958 | 0.510468 |
| LOC101928152 | 5.41386 | 1.31298  |
| LOC101928189 | 8.87125 | 0.666845 |
| LOC101928195 | 5.39179 | 0.423138 |
| LOC101928198 | 4.93702 | 0.888988 |
| LOC101928230 | 5.87667 | 0.475959 |
| LOC101928361 | 5.23271 | 0.633789 |
| LOC101928371 | 5.23366 | 0.41478  |
| LOC101928403 | 5.19235 | 0.499578 |
| LOC101928433 | 5.92026 | 0.766221 |
| LOC101928589 | 6.14292 | 0.585681 |
| LOC101928615 | 8.63912 | 0.655962 |
| LOC101928625 | 6.31091 | 0.803783 |
| LOC101928647 | 5.12669 | 0.425383 |
| LOC101928676 | 8.1938  | 0.545548 |
| LOC101928789 | 7.14699 | 0.723462 |
| LOC101928806 | 5.348   | 0.547929 |
| LOC101928830 | 10.0062 | 0.579837 |
| LOC101928852 | 4.98599 | 0.4173   |
| LOC101928879 | 6.77418 | 0.520579 |
| LOC101928927 | 7.70465 | 0.577097 |
| LOC101929072 | 5.93207 | 0.525868 |
| LOC101929112 | 5.89333 | 0.536711 |
| LOC101929115 | 5.37135 | 0.601436 |
| LOC101929141 | 6.32497 | 1.74973  |

|              |         |          |
|--------------|---------|----------|
| LOC101929177 | 6.16747 | 0.434866 |
| LOC101929219 | 5.56342 | 0.616479 |
| LOC101929243 | 6.77805 | 0.807529 |
| LOC101929272 | 7.82886 | 1.81663  |
| LOC101929356 | 7.64565 | 0.479051 |
| LOC101929368 | 7.03946 | 0.499885 |
| LOC101929479 | 6.58855 | 0.404781 |
| LOC101929612 | 7.94594 | 0.674098 |
| LOC101929655 | 6.22307 | 0.400978 |
| LOC101929740 | 5.72669 | 0.637281 |
| LOC101929747 | 4.82353 | 0.448461 |
| LOC101929759 | 5.59935 | 0.96734  |
| LOC101929787 | 5.99214 | 0.817109 |
| LOC101929792 | 5.85355 | 0.521299 |
| LOC101929796 | 7.3831  | 1.26053  |
| LOC101929819 | 5.79212 | 0.493729 |
| LOC101929841 | 6.39493 | 0.484498 |
| LOC101929855 | 5.73491 | 0.866852 |
| LOC101929876 | 11.8815 | 0.696551 |
| LOC101929880 | 6.90608 | 0.707805 |
| LOC101929886 | 6.48709 | 0.795455 |
| LOC101929889 | 7.12343 | 0.54327  |
| LOC101929897 | 6.173   | 0.409908 |
| LOC101929910 | 6.56894 | 0.522603 |
| LOC101930026 | 6.4503  | 0.414484 |
| LOC101930052 | 6.08891 | 0.544274 |
| LOC101930059 | 6.13759 | 0.757544 |
| LOC101930100 | 4.85344 | 0.508494 |
| LOC101930107 | 7.22803 | 0.546222 |
| LOC101930112 | 5.93723 | 0.419994 |
| LOC101930115 | 6.05901 | 0.48864  |
| LOC101930123 | 6.57483 | 0.55091  |
| LOC101930154 | 7.712   | 0.492907 |
| LOC101930278 | 7.07294 | 0.5241   |
| LOC101930306 | 5.22741 | 0.413696 |
| LOC101930324 | 8.83194 | 0.507183 |
| LOC101930388 | 5.31958 | 0.510468 |
| LOC101930415 | 7.62892 | 0.957947 |
| LOC101930416 | 5.85355 | 0.521299 |
| LOC101930489 | 7.6673  | 0.865069 |
| LOC101930531 | 6.10648 | 0.705418 |
| LOC101930583 | 7.80165 | 0.680691 |
| LOC101930591 | 7.86529 | 0.416836 |
| LOC101930595 | 5.00962 | 0.435406 |
| LOC102288414 | 8.39657 | 0.518503 |
| LOC102606465 | 4.98019 | 0.591681 |
| LOC102723678 | 5.42737 | 0.647017 |

|              |         |          |
|--------------|---------|----------|
| LOC102723692 | 5.06525 | 0.493147 |
| LOC102723709 | 5.42737 | 0.647017 |
| LOC102723773 | 5.98226 | 0.909193 |
| LOC102723779 | 6.02613 | 0.80529  |
| LOC102723847 | 5.1887  | 0.40911  |
| LOC102723859 | 7.00544 | 0.473434 |
| LOC102723891 | 9.30384 | 1.34837  |
| LOC102723897 | 7.75284 | 0.529578 |
| LOC102724017 | 6.62201 | 0.712232 |
| LOC102724093 | 6.62875 | 0.838701 |
| LOC102724112 | 5.83966 | 0.593344 |
| LOC102724197 | 5.68224 | 0.426046 |
| LOC102724229 | 5.52328 | 0.998422 |
| LOC102724250 | 6.23104 | 0.495644 |
| LOC102724356 | 7.21508 | 0.920961 |
| LOC102724362 | 6.07532 | 0.642253 |
| LOC102724364 | 7.89724 | 0.609519 |
| LOC102724517 | 6.09991 | 1.14299  |
| LOC102724532 | 6.72759 | 0.565457 |
| LOC102724562 | 6.08891 | 0.544274 |
| LOC102724614 | 8.09703 | 0.651593 |
| LOC102724782 | 5.45165 | 0.409442 |
| LOC102724788 | 5.85032 | 0.491324 |
| LOC102724814 | 5.69304 | 0.459252 |
| LOC102724851 | 5.33103 | 0.740908 |
| LOC102724862 | 7.00544 | 0.473434 |
| LOC102724870 | 6.52083 | 0.413677 |
| LOC102724884 | 8.51587 | 0.725877 |
| LOC102724923 | 5.90969 | 0.671481 |
| LOC102724967 | 6.24984 | 0.442499 |
| LOC102724984 | 8.38483 | 0.422595 |
| LOC102724985 | 6.59686 | 0.486068 |
| LOC102724993 | 9.27647 | 0.529879 |
| LOC102725051 | 9.30384 | 1.34837  |
| LOC102725125 | 7.53614 | 0.945283 |
| LOC102725127 | 5.21019 | 0.664532 |
| LOC102725188 | 9.24893 | 1.0002   |
| LOC102725198 | 6.3396  | 0.623429 |
| LOC102725426 | 8.90517 | 2.13372  |
| LOC102725526 | 5.654   | 0.97376  |
| LOC103091866 | 8.73012 | 1.04582  |
| LOC113230    | 5.67116 | 0.435449 |
| LOC150776    | 6.54243 | 0.478868 |
| LOC153546    | 6.99462 | 0.586668 |
| LOC153684    | 6.77651 | 0.724473 |
| LOC154761    | 5.96884 | 0.793888 |
| LOC157562    | 5.28608 | 0.448097 |



|           |         |          |
|-----------|---------|----------|
| LOC158960 | 6.97429 | 0.505232 |
| LOC202025 | 4.87934 | 0.614477 |
| LOC220729 | 7.05538 | 1.07369  |
| LOC254896 | 5.5243  | 0.45626  |
| LOC283070 | 6.84711 | 0.789398 |
| LOC283278 | 5.03278 | 0.714926 |
| LOC284454 | 7.08222 | 0.689553 |
| LOC284889 | 4.99422 | 0.406508 |
| LOC285074 | 7.34927 | 0.542157 |
| LOC285812 | 5.45253 | 1.06767  |
| LOC285835 | 5.93207 | 0.525868 |
| LOC286052 | 5.73314 | 0.977323 |
| LOC286367 | 5.12671 | 0.662599 |
| LOC286437 | 6.1222  | 0.51839  |
| LOC374443 | 4.83303 | 0.69788  |
| LOC389765 | 5.08458 | 0.662007 |
| LOC389834 | 5.41382 | 0.803776 |
| LOC439994 | 7.1412  | 0.636979 |
| LOC440354 | 7.47835 | 0.753797 |
| LOC440434 | 7.51473 | 0.424287 |
| LOC441155 | 7.74884 | 0.553931 |
| LOC441259 | 5.91933 | 0.459188 |
| LOC613037 | 6.4516  | 0.573535 |
| LOC642236 | 5.03655 | 0.505421 |
| LOC642361 | 7.1412  | 0.636979 |
| LOC642423 | 6.58855 | 0.404781 |
| LOC642846 | 6.73377 | 0.666891 |
| LOC643072 | 5.21434 | 0.641686 |
| LOC643733 | 5.06801 | 0.848467 |
| LOC644656 | 6.7043  | 0.863884 |
| LOC645166 | 4.85361 | 0.440867 |
| LOC646214 | 5.62885 | 0.517241 |
| LOC646743 | 4.92248 | 0.429384 |
| LOC646762 | 6.22241 | 0.829825 |
| LOC727751 | 6.58855 | 0.404781 |
| LOC727820 | 7.62939 | 0.79611  |
| LOC728026 | 11.4907 | 0.452525 |
| LOC728392 | 6.82415 | 0.586136 |
| LOC728554 | 7.14163 | 0.724943 |
| LOC728613 | 5.67752 | 0.49628  |
| LOC728715 | 7.89465 | 1.80851  |
| LOC728730 | 5.13457 | 0.487995 |
| LOC728903 | 6.50366 | 0.743343 |
| LOC729218 | 5.1162  | 0.536895 |
| LOC729737 | 7.0353  | 0.745539 |
| LOC729887 | 5.26646 | 0.468839 |
| LOC730098 | 5.68082 | 0.405114 |

|           |         |          |
|-----------|---------|----------|
| LOC730101 | 7.27583 | 1.36674  |
| LOC732360 | 6.5954  | 0.635298 |
| LOC93622  | 5.60403 | 0.689477 |
| LOH12CR1  | 5.42636 | 0.451976 |
| LONP1     | 7.86948 | 0.562099 |
| LONP2     | 6.50883 | 0.484843 |
| LONRF1    | 5.8165  | 0.674742 |
| LPCAT1    | 7.00887 | 0.560273 |
| LPIN1     | 7.60749 | 0.713862 |
| LPIN2     | 4.96623 | 0.4401   |
| LPPR3     | 5.93244 | 0.456336 |
| LPXN      | 7.45536 | 0.677732 |
| LRBA      | 6.54923 | 0.636869 |
| LRCH1     | 4.84082 | 0.47024  |
| LRG1      | 5.34225 | 0.453569 |
| LRIF1     | 6.95259 | 0.967721 |
| LRMP      | 8.44339 | 1.19498  |
| LRP10     | 7.28221 | 0.41058  |
| LRP11     | 4.90937 | 1.14015  |
| LRP6      | 5.21895 | 0.428335 |
| LRP8      | 5.33857 | 0.761076 |
| LRPPRC    | 7.00692 | 0.481199 |
| LRR1      | 6.06857 | 0.528668 |
| LRRC16A   | 6.74728 | 0.562555 |
| LRRC16B   | 6.23976 | 0.467583 |
| LRRC25    | 5.72108 | 0.560226 |
| LRRC37B   | 6.39493 | 0.484498 |
| LRRC40    | 7.2744  | 0.413627 |
| LRRC42    | 5.61057 | 0.460114 |
| LRRC47    | 8.57964 | 0.449762 |
| LRRC58    | 6.08503 | 0.520667 |
| LRRC69    | 4.92825 | 0.578233 |
| LRRC8C    | 5.4352  | 0.442148 |
| LRRC8D    | 8.30358 | 0.614941 |
| LRRD1     | 6.55335 | 0.442508 |
| LRRFIP1   | 6.37189 | 0.522419 |
| LRRK1     | 6.15557 | 0.706326 |
| LRRK2     | 5.07709 | 1.38563  |
| LRRN1     | 6.92136 | 1.19824  |
| LRRN2     | 5.03395 | 0.427669 |
| LRRTM2    | 4.95703 | 0.726153 |
| LRTM2     | 5.608   | 0.557796 |
| LRWD1     | 7.11589 | 0.506725 |
| LSAMP     | 5.48249 | 1.09246  |
| LSG1      | 6.75649 | 0.494184 |
| LSM1      | 8.97221 | 0.46591  |
| LSM10     | 8.47447 | 0.465412 |

|            |         |          |
|------------|---------|----------|
| LSM12      | 6.99128 | 0.488363 |
| LSM14A     | 8.00141 | 0.403233 |
| LSM2       | 7.11306 | 0.664985 |
| LSM4       | 6.95675 | 0.431412 |
| LSM5       | 7.04451 | 0.709616 |
| LSM6       | 7.53881 | 0.563738 |
| LSM7       | 9.96135 | 0.626409 |
| LSM8       | 5.91475 | 0.48753  |
| LSP1       | 7.93698 | 1.17814  |
| LSR        | 7.70557 | 0.877323 |
| LST1       | 5.77748 | 0.70217  |
| LTA4H      | 10.0062 | 0.579837 |
| LTB        | 5.38903 | 0.446427 |
| LTB4R2     | 5.08573 | 0.459929 |
| LTBP1      | 6.85697 | 0.811486 |
| LTF        | 6.19979 | 1.67365  |
| LTK        | 5.47019 | 0.604213 |
| LTN1       | 6.17212 | 0.546819 |
| LTV1       | 6.253   | 0.539376 |
| LUC7L2     | 7.55318 | 0.434984 |
| LUC7L3     | 7.78791 | 0.530514 |
| LUZP6      | 9.85691 | 0.5203   |
| LXN        | 6.50519 | 0.975961 |
| LY6E       | 7.54872 | 1.20776  |
| LY75       | 6.61247 | 0.803525 |
| LY75-CD302 | 6.05847 | 1.06541  |
| LY86       | 7.04044 | 1.342    |
| LY9        | 8.2133  | 0.975694 |
| LY96       | 9.6142  | 1.16301  |
| LYAR       | 6.88252 | 0.585382 |
| LYL1       | 6.5712  | 0.457967 |
| LYN        | 7.53307 | 0.640023 |
| LYPD6B     | 6.29982 | 1.42556  |
| LYPLA1     | 9.23994 | 0.641435 |
| LYPLAL1    | 7.06342 | 0.833558 |
| LYRM1      | 8.65635 | 0.548534 |
| LYRM4      | 6.8848  | 0.606366 |
| LYRM5      | 8.79912 | 0.65631  |
| LYRM7      | 6.21829 | 0.637295 |
| LYSMD1     | 5.00746 | 0.53934  |
| LYSMD2     | 6.86198 | 1.72327  |
| LYSMD3     | 8.12143 | 0.847073 |
| LYSMD4     | 5.80303 | 0.548365 |
| LYZ        | 6.60601 | 1.92607  |
| LZIC       | 6.42938 | 0.472962 |
| LZTFL1     | 5.90511 | 0.530386 |
| LZTS3      | 5.4394  | 0.518643 |

|          |         |          |
|----------|---------|----------|
| M6PR     | 8.07451 | 0.54505  |
| MAD2L1   | 5.29313 | 0.937023 |
| MAD2L1BP | 6.57011 | 0.464493 |
| MAD2L2   | 7.01334 | 0.471327 |
| MAEA     | 8.1938  | 0.545548 |
| MAF1     | 7.34165 | 0.453101 |
| MAFB     | 5.9537  | 1.28146  |
| MAFF     | 7.46077 | 1.32682  |
| MAFIP    | 7.04277 | 0.694091 |
| MAGEA12  | 4.88299 | 1.46114  |
| MAGEA3   | 6.48994 | 2.4215   |
| MAGEA6   | 6.43185 | 2.38272  |
| MAGEA9   | 5.0042  | 0.658862 |
| MAGEA9B  | 5.0042  | 0.658862 |
| MAGEC1   | 7.10097 | 1.82016  |
| MAGEC2   | 4.90349 | 0.568722 |
| MAGED1   | 10.2667 | 0.695488 |
| MAGED2   | 7.55597 | 0.534802 |
| MAGED4   | 5.37218 | 1.05267  |
| MAGED4B  | 5.37218 | 1.05267  |
| MAGEE1   | 5.62739 | 0.451632 |
| MAGEF1   | 6.49616 | 0.687763 |
| MAGEH1   | 8.21239 | 0.725046 |
| MAGI2    | 5.03272 | 1.29072  |
| MAGOH    | 6.96994 | 0.561932 |
| MAGOHB   | 5.84245 | 0.40646  |
| MAGT1    | 9.15638 | 0.565629 |
| MAK16    | 6.80421 | 0.710708 |
| MAL      | 4.9689  | 1.41301  |
| MALAT1   | 10.8176 | 0.572332 |
| MALT1    | 6.87819 | 0.850678 |
| MAMDC4   | 5.46109 | 0.440487 |
| MAML1    | 6.88791 | 0.619787 |
| MAML2    | 5.65881 | 0.986173 |
| MAN1A1   | 9.69397 | 1.10433  |
| MAN1A2   | 6.11889 | 0.419784 |
| MAN1B1   | 7.39124 | 0.479472 |
| MAN1C1   | 5.23385 | 0.941244 |
| MAN2A1   | 9.74437 | 0.738348 |
| MAN2A2   | 6.20217 | 0.454271 |
| MAN2B1   | 8.57256 | 0.641006 |
| MAN2B2   | 7.09924 | 0.617735 |
| MANBA    | 6.75573 | 0.525467 |
| MANBAL   | 7.6673  | 0.50816  |
| MANEA    | 7.75743 | 1.06221  |
| MANEAL   | 6.51214 | 0.63191  |
| MANF     | 10.5939 | 0.739834 |

|           |       |         |          |
|-----------|-------|---------|----------|
| MANSC1    |       | 6.2717  | 1.32486  |
| MAP1LC3B  |       | 9.07924 | 0.693373 |
| MAP1S     |       | 5.83189 | 0.418141 |
| MAP2      |       | 5.09805 | 1.06212  |
| MAP2K1    |       | 8.22583 | 0.53569  |
| MAP2K3    |       | 6.7227  | 0.585743 |
| MAP2K4    |       | 6.44433 | 0.492925 |
| MAP2K6    |       | 4.97072 | 0.529901 |
| MAP3K1    |       | 7.99441 | 0.76824  |
| MAP3K13   |       | 5.88382 | 0.448087 |
| MAP3K14   |       | 5.53317 | 0.876468 |
| MAP3K4    |       | 7.11817 | 0.538452 |
| MAP3K5    |       | 7.51523 | 0.902998 |
| MAP3K7    |       | 6.60174 | 0.586352 |
| MAP3K8    |       | 5.18334 | 1.18148  |
| MAP4K1    |       | 6.43638 | 0.414145 |
| MAP4K3    |       | 6.4692  | 0.835338 |
| MAP4K5    |       | 5.76848 | 0.543831 |
| MAP7      |       | 5.00584 | 0.613024 |
| MAP7D1    |       | 6.4515  | 0.564489 |
| MAPK1     |       | 5.81841 | 0.40579  |
| MAPK13    |       | 6.73651 | 0.793615 |
| MAPK1IP1L |       | 7.7815  | 0.440233 |
| MAPK8     |       | 5.61335 | 0.446062 |
| MAPKAPK2  |       | 7.72452 | 0.729992 |
| MAPKAPK5  |       | 6.0638  | 0.514874 |
| MAPRE1    |       | 8.83679 | 0.434967 |
|           | 1-Mar | 6.09653 | 0.592273 |
|           | 2-Mar | 5.9237  | 0.826797 |
|           | 2-Mar | 6.40276 | 0.502431 |
|           | 3-Mar | 5.07426 | 0.475564 |
|           | 5-Mar | 5.8599  | 0.469769 |
| MARCKS    |       | 7.17726 | 1.65011  |
| MARCKSL1  |       | 7.43861 | 1.11323  |
| MARS      |       | 8.27024 | 0.479879 |
| MARS2     |       | 5.32813 | 0.729438 |
| MARVELD2  |       | 4.90312 | 0.585908 |
| MAST1     |       | 6.03682 | 0.576163 |
| MAST3     |       | 6.48966 | 0.446259 |
| MAST4     |       | 5.24287 | 0.514461 |
| MASTL     |       | 5.15585 | 0.698848 |
| MAT1A     |       | 5.61727 | 0.400797 |
| MAT2A     |       | 7.69056 | 0.733992 |
| MAT2B     |       | 7.20341 | 0.435777 |
| MATN1-AS1 |       | 4.88635 | 0.643223 |
| MAX       |       | 6.69201 | 0.417507 |
| MAZ       |       | 6.46415 | 0.422998 |

|           |         |          |
|-----------|---------|----------|
| MB21D2    | 7.01643 | 1.09182  |
| MBD4      | 8.35798 | 0.588187 |
| MBIP      | 5.25737 | 0.549412 |
| MBL1P     | 4.9008  | 0.421455 |
| MBNL1     | 7.38957 | 0.613476 |
| MBNL2     | 7.14101 | 0.760053 |
| MBNL3     | 5.52645 | 0.677487 |
| MBTD1     | 5.52891 | 0.457331 |
| MBTPS1    | 7.54901 | 0.435596 |
| MC4R      | 6.22461 | 1.83765  |
| MCAM      | 5.42334 | 0.41859  |
| MCAT      | 6.47352 | 0.481449 |
| MCC       | 7.60827 | 1.02758  |
| MCCC1     | 7.60886 | 0.502256 |
| MCEE      | 8.27825 | 0.495193 |
| MCEMP1    | 5.4839  | 0.742839 |
| MCF2L-AS1 | 5.04487 | 0.711493 |
| MCFD2     | 6.59372 | 0.456606 |
| MCL1      | 8.86932 | 0.570584 |
| MCM2      | 7.01286 | 1.04487  |
| MCM3      | 7.07921 | 0.826195 |
| MCM4      | 5.30397 | 0.540845 |
| MCM5      | 6.53083 | 0.774854 |
| MCM6      | 5.8057  | 0.620693 |
| MCM7      | 7.38812 | 0.733098 |
| MCOLN1    | 6.90248 | 0.472291 |
| MCPH1     | 4.98575 | 0.456674 |
| MCRS1     | 6.7513  | 0.430958 |
| MCTP2     | 6.72964 | 0.725428 |
| MCU       | 6.43067 | 0.444068 |
| MCUR1     | 7.55937 | 0.678051 |
| MDC1      | 5.86471 | 0.402013 |
| MDFIC     | 7.87337 | 0.688712 |
| MDH1      | 9.96169 | 0.656278 |
| MDH2      | 7.96933 | 0.469301 |
| MDK       | 7.36076 | 1.17583  |
| MDM1      | 5.0536  | 0.526281 |
| MDM2      | 5.86033 | 0.549198 |
| MDM4      | 6.887   | 0.593826 |
| MDN1      | 5.15272 | 0.418319 |
| MDP1      | 7.12626 | 0.551959 |
| ME2       | 8.17049 | 0.910161 |
| MEA1      | 8.67728 | 0.449016 |
| MECP2     | 5.91581 | 0.41431  |
| MECR      | 6.55838 | 0.413785 |
| MED1      | 6.69633 | 0.557274 |
| MED10     | 7.19979 | 0.40331  |

|               |         |          |
|---------------|---------|----------|
| MED11         | 7.06128 | 0.516262 |
| MED13         | 6.65097 | 0.414084 |
| MED13L        | 7.34143 | 0.601478 |
| MED17         | 5.87488 | 0.5099   |
| MED19         | 7.59429 | 0.437372 |
| MED20         | 5.65667 | 0.468739 |
| MED21         | 6.31091 | 0.803783 |
| MED22         | 5.89292 | 0.425599 |
| MED23         | 5.90322 | 0.41951  |
| MED26         | 6.08142 | 0.406301 |
| MED29         | 6.25287 | 0.510496 |
| MED30         | 5.22449 | 0.459113 |
| MED31         | 5.8858  | 0.490848 |
| MED4          | 5.31065 | 0.575663 |
| MED6          | 6.68158 | 0.611435 |
| MED7          | 6.47324 | 0.467979 |
| MED8          | 6.95691 | 0.482527 |
| MEF2A         | 6.49562 | 0.616372 |
| MEF2B         | 5.72371 | 0.863846 |
| MEF2BNB-MEF2B | 5.72371 | 0.863846 |
| MEF2C         | 9.46416 | 0.767027 |
| MEGF9         | 4.81155 | 0.626959 |
| MEI1          | 7.44673 | 0.569477 |
| MEIS2         | 5.63998 | 2.46003  |
| MEIS3P1       | 6.10905 | 0.626216 |
| MELK          | 6.56465 | 1.14163  |
| MEMO1         | 7.19772 | 0.514973 |
| MEN1          | 6.96101 | 0.51887  |
| MEPCE         | 7.88741 | 0.489649 |
| MERTK         | 5.7362  | 0.705544 |
| MESDC1        | 6.65943 | 0.517491 |
| MEST          | 5.90177 | 1.35548  |
| MET           | 5.15941 | 0.477844 |
| METAP1        | 7.62849 | 0.478365 |
| METAP2        | 7.36716 | 0.527933 |
| METRN         | 5.81738 | 0.423483 |
| METRNL        | 5.42506 | 1.15933  |
| METTLL1       | 6.83212 | 0.509357 |
| METTLL13      | 6.65741 | 0.61308  |
| METTLL18      | 6.55007 | 0.918406 |
| METTLL21A     | 5.04539 | 0.548184 |
| METTLL21B     | 5.86656 | 0.707528 |
| METTLL23      | 9.21654 | 0.470651 |
| METTLL25      | 6.84638 | 0.534211 |
| METTLL2A      | 6.64138 | 0.625457 |
| METTLL2B      | 5.7484  | 0.473443 |
| METTLL3       | 7.09059 | 0.464576 |

|           |         |          |
|-----------|---------|----------|
| METTL4    | 5.16147 | 0.575642 |
| METTL5    | 6.84709 | 0.422282 |
| METTL8    | 5.97136 | 0.655308 |
| METTL9    | 7.1877  | 0.420147 |
| MEX3C     | 5.71332 | 0.45183  |
| MFAP1     | 7.48247 | 0.985374 |
| MFAP2     | 5.54037 | 0.559039 |
| MFAP3     | 5.28666 | 0.517581 |
| MFAP3L    | 4.93702 | 0.888988 |
| MFAP4     | 5.04431 | 0.446182 |
| MFF       | 8.03062 | 0.48749  |
| MFGE8     | 6.0705  | 0.446556 |
| MFN1      | 7.0009  | 0.592594 |
| MFNG      | 6.45917 | 0.709012 |
| MFSD1     | 9.55183 | 0.628677 |
| MFSD10    | 6.44407 | 0.466277 |
| MFSD3     | 5.89624 | 0.511489 |
| MFSD5     | 6.63496 | 0.580155 |
| MFSD6     | 6.85044 | 0.868291 |
| MFSD8     | 5.58394 | 0.557562 |
| MGA       | 5.17583 | 0.488944 |
| MGAT1     | 8.33965 | 0.541793 |
| MGAT2     | 8.37017 | 0.514772 |
| MGAT4B    | 6.70952 | 0.444384 |
| MGAT5     | 5.04201 | 0.50089  |
| MGC12488  | 5.41215 | 0.688602 |
| MGC50722  | 5.16465 | 0.423374 |
| MGEA5     | 7.19428 | 0.527852 |
| MGLL      | 5.93346 | 1.07781  |
| MGME1     | 6.85099 | 0.870157 |
| MGMT      | 6.84098 | 0.696023 |
| MGRN1     | 6.80332 | 0.428042 |
| MGST2     | 6.69629 | 0.885328 |
| MIA-RAB4B | 6.67476 | 0.486806 |
| MIA3      | 7.82101 | 0.587264 |
| MIAT      | 6.4238  | 1.28893  |
| MIATNB    | 5.5636  | 0.506565 |
| MIB1      | 6.97582 | 0.794006 |
| MICA      | 6.42473 | 0.419511 |
| MICAL1    | 6.60816 | 0.58965  |
| MICB      | 7.23388 | 0.515408 |
| MICU1     | 6.86156 | 0.424815 |
| MICU2     | 7.69526 | 0.747832 |
| MID1IP1   | 5.70777 | 1.06092  |
| MID2      | 5.73933 | 0.603619 |
| MIEF1     | 7.21591 | 0.56019  |
| MIER1     | 5.26415 | 0.424768 |



|             |         |          |
|-------------|---------|----------|
| MIER3       | 5.05232 | 0.534069 |
| MIF         | 11.609  | 0.591396 |
| MIF4GD      | 6.51721 | 0.52916  |
| MINA        | 7.10338 | 0.564566 |
| MINPP1      | 6.69414 | 0.895202 |
| MIOS        | 6.45172 | 0.443131 |
| MIR101-1    | 5.43338 | 0.692453 |
| MIR1182     | 5.88319 | 0.801767 |
| MIR1199     | 5.67116 | 0.435449 |
| MIR1234     | 7.46304 | 0.467638 |
| MIR1236     | 8.93863 | 0.518316 |
| MIR1244-1   | 11.4907 | 0.452525 |
| MIR1244-2   | 11.4907 | 0.452525 |
| MIR1248     | 10.3277 | 0.543255 |
| MIR1292     | 7.98352 | 0.525796 |
| MIR1304     | 8.83222 | 0.80499  |
| MIR142      | 6.62001 | 0.503136 |
| MIR155      | 6.01022 | 2.37587  |
| MIR155HG    | 6.01022 | 2.37587  |
| MIR181A2HG  | 4.84621 | 0.714676 |
| MIR186      | 5.54974 | 0.654487 |
| MIR21       | 7.99565 | 1.14785  |
| MIR22       | 7.66417 | 0.9239   |
| MIR22HG     | 7.66417 | 0.9239   |
| MIR23A      | 7.08222 | 0.689553 |
| MIR24-2     | 7.08222 | 0.689553 |
| MIR29B2     | 8.70778 | 0.9096   |
| MIR29C      | 8.70778 | 0.9096   |
| MIR3190     | 6.83255 | 0.438232 |
| MIR3191     | 6.83255 | 0.438232 |
| MIR3620     | 8.91579 | 0.405411 |
| MIR3652     | 12.5726 | 0.491153 |
| MIR3656     | 6.68084 | 0.522342 |
| MIR3658     | 6.66102 | 0.622971 |
| MIR3671     | 5.43338 | 0.692453 |
| MIR3916     | 5.29917 | 0.98394  |
| MIR3917     | 6.61334 | 0.529908 |
| MIR4435-1HG | 5.4429  | 0.414207 |
| MIR4453     | 6.97683 | 0.972807 |
| MIR4467     | 7.11589 | 0.506725 |
| MIR4640     | 5.60781 | 0.473182 |
| MIR4647     | 7.38075 | 0.49095  |
| MIR4657     | 6.7739  | 0.523664 |
| MIR4680     | 8.4276  | 1.00784  |
| MIR4707     | 6.62472 | 0.638197 |
| MIR4738     | 12.1026 | 0.767475 |
| MIR4784     | 9.37121 | 0.573565 |

|           |         |          |
|-----------|---------|----------|
| MIR5193   | 7.42395 | 0.634991 |
| MIR600    | 5.65054 | 0.400128 |
| MIR600HG  | 5.65054 | 0.400128 |
| MIR612    | 8.61682 | 0.706594 |
| MIR6125   | 6.30357 | 0.42135  |
| MIR6132   | 6.36975 | 0.442949 |
| MIR631    | 5.6485  | 0.443436 |
| MIR636    | 10.1927 | 0.425978 |
| MIR6513   | 6.90224 | 0.46861  |
| MIR6516   | 5.28603 | 0.687087 |
| MIR664B   | 8.43967 | 0.685712 |
| MIR6732   | 7.27017 | 1.0192   |
| MIR6733   | 7.74088 | 0.6178   |
| MIR6734   | 7.39797 | 0.427483 |
| MIR6741   | 7.57459 | 0.647642 |
| MIR6748   | 8.64465 | 0.436963 |
| MIR6751   | 8.89844 | 0.542338 |
| MIR6756   | 5.46686 | 0.412881 |
| MIR6758   | 8.27024 | 0.479879 |
| MIR6778   | 6.48401 | 0.601095 |
| MIR6787   | 5.77719 | 0.517674 |
| MIR6791   | 8.49797 | 0.475272 |
| MIR6800   | 7.91837 | 0.535669 |
| MIR6805   | 10.0048 | 0.44455  |
| MIR6824   | 5.40884 | 0.44177  |
| MIR6831   | 6.47076 | 0.528358 |
| MIR6837   | 6.66954 | 0.400197 |
| MIR6840   | 7.8853  | 0.714721 |
| MIR6845   | 6.18235 | 0.577309 |
| MIR6849   | 7.46304 | 0.467638 |
| MIR6859-1 | 7.712   | 0.492907 |
| MIR6859-2 | 7.712   | 0.492907 |
| MIR6866   | 7.22201 | 0.452167 |
| MIR6878   | 6.8063  | 0.424864 |
| MIR6883   | 6.93696 | 0.662275 |
| MIR6884   | 6.06708 | 0.5131   |
| MIR6890   | 10.0963 | 0.584079 |
| MIR7110   | 9.35822 | 0.682919 |
| MIR7112   | 6.72807 | 0.575048 |
| MIR7114   | 5.53884 | 0.505435 |
| MIR7703   | 11.2072 | 0.649592 |
| MIR8071-1 | 11.0851 | 2.17286  |
| MIR8071-2 | 11.0851 | 2.17286  |
| MIR8085   | 5.89018 | 0.472921 |
| MIR939    | 7.46304 | 0.467638 |
| MIRLET7D  | 6.17605 | 0.545712 |
| MIS12     | 8.22515 | 0.691094 |

|          |         |          |
|----------|---------|----------|
| MIS18A   | 5.33812 | 0.653362 |
| MIS18BP1 | 5.13306 | 0.599239 |
| MITD1    | 6.83489 | 0.777289 |
| MIXL1    | 6.32791 | 0.645703 |
| MKI67    | 5.19774 | 0.730845 |
| MKKS     | 7.41892 | 0.488941 |
| MKLN1    | 5.72582 | 0.473413 |
| MKNK2    | 9.20154 | 0.593899 |
| MKRN1    | 7.98198 | 0.623398 |
| MLEC     | 9.00423 | 0.534041 |
| MLF2     | 7.4324  | 0.510362 |
| MLH1     | 8.68819 | 0.458218 |
| MLKL     | 7.70393 | 1.08922  |
| MLLT11   | 6.22414 | 1.10605  |
| MLLT3    | 7.60432 | 1.2001   |
| MLN      | 4.88405 | 0.463104 |
| MLST8    | 6.12018 | 0.464506 |
| MMACHC   | 6.479   | 0.470607 |
| MMADHC   | 10.5508 | 0.454913 |
| MMD      | 5.36385 | 0.54073  |
| MMGT1    | 9.29034 | 0.601845 |
| MMP17    | 5.69988 | 0.400628 |
| MMP9     | 5.88682 | 1.03352  |
| MNAT1    | 6.44737 | 0.593952 |
| MNDA     | 5.36556 | 1.71934  |
| MOAP1    | 8.00927 | 0.609261 |
| MOB1A    | 7.57333 | 0.571068 |
| MOB1B    | 5.87116 | 0.835718 |
| MOB3A    | 7.26829 | 0.6387   |
| MOB4     | 8.07892 | 0.545811 |
| MOCS2    | 5.14801 | 0.409556 |
| MOGS     | 7.97619 | 0.483247 |
| MON1A    | 6.5322  | 0.485723 |
| MON1B    | 6.69012 | 0.542143 |
| MON2     | 5.74159 | 0.437318 |
| MORC1    | 4.85145 | 1.51907  |
| MORC3    | 6.02871 | 0.616914 |
| MORC4    | 6.15436 | 0.811981 |
| MORF4L1  | 10.0865 | 0.525157 |
| MORF4L2  | 8.73215 | 0.744454 |
| MORN2    | 5.22858 | 0.57799  |
| MOSPD1   | 7.16474 | 0.662769 |
| MOSPD2   | 5.69049 | 0.526152 |
| MOXD1    | 6.21294 | 1.08439  |
| MPC1     | 6.50819 | 0.551229 |
| MPC2     | 7.4834  | 0.570949 |
| MPG      | 7.31701 | 0.442337 |

|            |         |          |
|------------|---------|----------|
| MPHOSPH10  | 7.43408 | 0.632703 |
| MPHOSPH6   | 5.25022 | 0.406487 |
| MPHOSPH8   | 6.46763 | 0.534265 |
| MPHOSPH9   | 5.90735 | 0.580515 |
| MPLKIP     | 8.16246 | 0.750119 |
| MPND       | 6.54823 | 0.590546 |
| MPO        | 4.81619 | 0.964527 |
| MPP1       | 6.18517 | 0.696015 |
| MPP5       | 5.4663  | 0.6346   |
| MPST       | 7.71867 | 0.484798 |
| MPV17      | 7.10504 | 0.468954 |
| MPV17L2    | 7.18812 | 0.455613 |
| MPZL1      | 6.48928 | 0.416142 |
| MR1        | 5.92559 | 0.459484 |
| MRFAP1     | 10.7846 | 0.55983  |
| MRFAP1L1   | 8.1947  | 0.758902 |
| MRGBP      | 6.19403 | 0.400047 |
| MRI1       | 7.45371 | 0.408553 |
| MROH7-TTC4 | 6.56649 | 0.614999 |
| MRPL1      | 7.70017 | 0.735597 |
| MRPL10     | 7.17343 | 0.573084 |
| MRPL11     | 7.94452 | 0.464671 |
| MRPL13     | 7.16215 | 0.886755 |
| MRPL14     | 8.27824 | 0.589793 |
| MRPL15     | 8.45389 | 0.739801 |
| MRPL16     | 7.84458 | 0.593472 |
| MRPL17     | 8.24289 | 0.59245  |
| MRPL18     | 8.79815 | 0.562096 |
| MRPL2      | 6.57141 | 0.432493 |
| MRPL21     | 8.19934 | 0.486103 |
| MRPL22     | 7.97764 | 0.617943 |
| MRPL24     | 8.70438 | 0.559551 |
| MRPL27     | 8.25541 | 0.64201  |
| MRPL3      | 10.3985 | 0.655296 |
| MRPL30     | 6.00926 | 0.455927 |
| MRPL32     | 9.68316 | 0.632555 |
| MRPL34     | 8.33489 | 0.584752 |
| MRPL36     | 9.10941 | 0.64162  |
| MRPL37     | 7.97576 | 0.609749 |
| MRPL39     | 5.50583 | 0.527853 |
| MRPL4      | 6.73118 | 0.537581 |
| MRPL40     | 9.11704 | 0.462687 |
| MRPL42     | 6.86767 | 0.568381 |
| MRPL43     | 7.01622 | 0.448717 |
| MRPL44     | 6.29064 | 0.522589 |
| MRPL45     | 7.74845 | 0.631463 |
| MRPL46     | 7.21189 | 0.585738 |

|                |         |          |
|----------------|---------|----------|
| MRPL48         | 8.13204 | 0.53193  |
| MRPL49         | 7.91648 | 0.586196 |
| MRPL50         | 6.25517 | 0.655478 |
| MRPL51         | 8.77865 | 0.432703 |
| MRPL53         | 9.40064 | 0.492665 |
| MRPL54         | 9.02524 | 0.468555 |
| MRPL57         | 7.98013 | 0.462092 |
| MRPL9          | 8.38454 | 0.577029 |
| MRPS10         | 7.20232 | 0.597642 |
| MRPS14         | 7.39066 | 0.634341 |
| MRPS17         | 7.43484 | 0.783062 |
| MRPS18A        | 7.21914 | 0.415888 |
| MRPS18B        | 8.6569  | 0.57042  |
| MRPS2          | 7.50493 | 0.839179 |
| MRPS21         | 9.79062 | 0.786753 |
| MRPS22         | 8.0478  | 0.480848 |
| MRPS24         | 10.6221 | 0.674739 |
| MRPS25         | 6.18603 | 0.448502 |
| MRPS28         | 7.49286 | 0.736694 |
| MRPS30         | 6.14836 | 0.583564 |
| MRPS31         | 7.19818 | 0.518921 |
| MRPS31P5       | 5.34423 | 0.568436 |
| MRPS33         | 9.40595 | 0.584787 |
| MRPS34         | 7.5956  | 0.414155 |
| MRPS35         | 7.67261 | 0.778909 |
| MRPS36         | 8.86838 | 0.628676 |
| MRPS6          | 7.65809 | 0.669015 |
| MRPS7          | 7.52745 | 0.461722 |
| MRPS9          | 7.23998 | 0.550241 |
| MRRF           | 7.17667 | 0.717586 |
| MRS2           | 5.48825 | 0.415404 |
| MRTO4          | 6.42466 | 0.483302 |
| MS4A1          | 5.20544 | 2.4292   |
| MSANTD2        | 5.99554 | 0.865871 |
| MSANTD3        | 6.76507 | 0.618164 |
| MSANTD3-TMEFF1 | 4.84889 | 1.59101  |
| MSANTD4        | 4.96613 | 0.555946 |
| MSH2           | 5.425   | 1.09135  |
| MSH5           | 5.76652 | 0.710606 |
| MSH5-SAPCD1    | 5.25198 | 0.484336 |
| MSI2           | 7.13332 | 0.579279 |
| MSL2           | 7.47702 | 0.776174 |
| MSL3           | 6.47375 | 0.542356 |
| MSMO1          | 7.74893 | 1.01929  |
| MSRB1          | 6.76351 | 0.675061 |
| MST1           | 6.80433 | 0.470362 |
| MST1P2         | 6.08891 | 0.544274 |

|         |         |          |
|---------|---------|----------|
| MST4    | 6.71374 | 0.900637 |
| MSTO1   | 7.07936 | 0.655462 |
| MSTO2P  | 7.48057 | 0.622357 |
| MT1E    | 6.78414 | 0.75909  |
| MT1F    | 6.53727 | 0.723324 |
| MT1G    | 5.48051 | 0.600458 |
| MT1H    | 6.80939 | 0.712637 |
| MT1HL1  | 7.62911 | 0.68674  |
| MT1X    | 6.86754 | 0.953772 |
| MT2A    | 7.90638 | 0.867556 |
| MTA1    | 6.37498 | 0.537295 |
| MTA2    | 4.84393 | 0.410293 |
| MTAP    | 4.85516 | 0.408351 |
| MTCH1   | 9.56401 | 0.428469 |
| MTCH2   | 7.59889 | 0.598243 |
| MTDH    | 10.4289 | 0.714724 |
| MTERF1  | 5.61102 | 0.48048  |
| MTERF2  | 5.32903 | 0.554248 |
| MTERF3  | 7.13466 | 0.65981  |
| MTF2    | 5.91441 | 0.575342 |
| MTFMT   | 6.58136 | 0.688939 |
| MTFP1   | 6.79114 | 0.449571 |
| MTFR1   | 5.60658 | 0.430728 |
| MTG1    | 6.13838 | 0.478062 |
| MTHFD1  | 5.9478  | 0.42949  |
| MTHFD1L | 5.44526 | 0.575827 |
| MTHFD2  | 7.17581 | 0.723787 |
| MTIF2   | 8.02182 | 0.66962  |
| MTMR1   | 6.57815 | 0.516907 |
| MTMR12  | 6.94038 | 0.545481 |
| MTMR2   | 5.99676 | 0.489713 |
| MTMR4   | 7.04725 | 0.652484 |
| MTMR9   | 5.93363 | 0.400177 |
| MTO1    | 6.67679 | 0.60927  |
| MTPAP   | 6.77188 | 0.550774 |
| MTR     | 6.12566 | 0.663342 |
| MTRR    | 8.09848 | 0.650307 |
| MTURN   | 5.25814 | 0.539219 |
| MTUS1   | 6.57752 | 0.818351 |
| MTX1    | 7.9377  | 0.586148 |
| MTX2    | 8.07749 | 0.539012 |
| MTX3    | 6.11493 | 0.482705 |
| MUC1    | 5.40348 | 0.40625  |
| MUC20   | 5.03275 | 0.538986 |
| MUS81   | 7.43756 | 0.401796 |
| MUT     | 7.0797  | 0.583928 |
| MVB12A  | 6.08655 | 0.6417   |

|         |         |          |
|---------|---------|----------|
| MVD     | 5.81315 | 0.400608 |
| MVP     | 7.57721 | 0.515378 |
| MX1     | 9.26312 | 1.48381  |
| MX2     | 7.02254 | 1.14798  |
| MXD1    | 6.37408 | 0.751958 |
| MXI1    | 9.65072 | 0.719859 |
| MXRA7   | 4.87619 | 0.537383 |
| MYADM   | 6.21639 | 1.33979  |
| MYBL1   | 5.33161 | 0.836052 |
| MYBL2   | 6.55523 | 0.593215 |
| MYC     | 10.3563 | 1.767    |
| MYCBP2  | 9.04542 | 0.644927 |
| MYD88   | 8.36059 | 0.536    |
| MYEF2   | 5.15373 | 0.578996 |
| MYEOV   | 7.70358 | 1.21918  |
| MYF6    | 5.17728 | 0.913285 |
| MYH9    | 7.06013 | 0.58966  |
| MYL12A  | 7.3451  | 0.695302 |
| MYL12B  | 9.68381 | 0.492965 |
| MYL5    | 5.67917 | 0.463075 |
| MYL6B   | 7.63368 | 0.510693 |
| MYLIP   | 6.652   | 0.817042 |
| MYO18A  | 6.25857 | 0.580102 |
| MYO1F   | 5.01525 | 0.70629  |
| MYO1G   | 5.77162 | 0.477522 |
| MYO5A   | 5.54463 | 0.712615 |
| MYO5C   | 6.94328 | 1.27526  |
| MYO6    | 6.9052  | 1.0228   |
| MYPOP   | 5.69963 | 0.446453 |
| MZB1    | 11.9767 | 0.701199 |
| MZF1    | 7.13847 | 0.407238 |
| MZT1    | 5.55707 | 0.484817 |
| MZT2A   | 9.33191 | 0.514363 |
| N4BP1   | 6.76979 | 0.437378 |
| N4BP2   | 6.67376 | 0.814957 |
| N4BP2L2 | 6.45921 | 0.574391 |
| N6AMT2  | 6.26408 | 0.431557 |
| NAA10   | 7.6355  | 0.53901  |
| NAA16   | 6.07172 | 0.642619 |
| NAA20   | 8.49916 | 0.419555 |
| NAA25   | 6.09252 | 0.603574 |
| NAA35   | 7.23139 | 0.534049 |
| NAA38   | 8.44482 | 0.558944 |
| NAA40   | 5.93398 | 0.560601 |
| NAA50   | 6.88163 | 0.536419 |
| NAAA    | 6.47233 | 0.546534 |
| NABP1   | 5.95396 | 0.634081 |

|           |         |          |
|-----------|---------|----------|
| NABP2     | 5.44406 | 0.455103 |
| NADK2     | 6.72804 | 0.653294 |
| NAE1      | 8.52871 | 0.513714 |
| NAF1      | 4.91999 | 0.530436 |
| NAGA      | 6.65484 | 0.614069 |
| NAGK      | 8.23159 | 0.735224 |
| NAGPA     | 6.32602 | 0.492245 |
| NAIP      | 5.53854 | 0.717031 |
| NAMPT     | 8.81235 | 1.06562  |
| NANP      | 5.27283 | 0.670192 |
| NAP1L1    | 8.83176 | 0.564855 |
| NAP1L2    | 5.7264  | 1.658    |
| NAP1L5    | 5.74338 | 0.882323 |
| NAPA      | 7.42677 | 0.488188 |
| NAPB      | 5.24072 | 0.462608 |
| NAPG      | 6.37075 | 0.593306 |
| NAPRT     | 6.8273  | 0.61123  |
| NARR      | 6.11464 | 1.29391  |
| NARS      | 10.3136 | 0.609352 |
| NARS2     | 7.96842 | 0.623755 |
| NASP      | 5.46141 | 0.719322 |
| NAT1      | 5.50354 | 0.875553 |
| NAT10     | 7.24308 | 0.576784 |
| NAT9      | 7.25583 | 0.415004 |
| NBEA      | 6.75801 | 1.29979  |
| NBN       | 6.63654 | 0.545144 |
| NBPF1     | 6.37337 | 0.400914 |
| NBPF10    | 8.55934 | 0.500521 |
| NBPF11    | 7.74775 | 0.453543 |
| NBPF12    | 7.99512 | 0.484897 |
| NBPF14    | 8.41907 | 0.507866 |
| NBPF15    | 7.74881 | 0.457069 |
| NBPF19    | 8.18495 | 0.492183 |
| NBPF20    | 7.84736 | 0.429853 |
| NBPF25P   | 8.77177 | 0.522831 |
| NBPF26    | 7.98111 | 0.530451 |
| NBPF8     | 7.57912 | 0.408964 |
| NBPF9     | 8.33044 | 0.523126 |
| NCAM1     | 5.39171 | 0.797966 |
| NCAPD2    | 5.65062 | 0.693037 |
| NCAPD3    | 6.76886 | 0.717255 |
| NCAPG     | 4.96769 | 1.09896  |
| NCAPG2    | 5.40952 | 1.05622  |
| NCBP1     | 5.03953 | 0.458281 |
| NCBP2     | 7.82145 | 0.58683  |
| NCBP2-AS2 | 7.98721 | 0.498127 |
| NCF1      | 7.11103 | 0.640005 |



|          |         |          |
|----------|---------|----------|
| NCF1B    | 7.10688 | 0.690347 |
| NCF1C    | 7.10688 | 0.690347 |
| NCF2     | 5.26235 | 1.23593  |
| NCF4     | 7.09822 | 1.10823  |
| NCK1     | 6.01668 | 0.530625 |
| NCK1-AS1 | 6.22018 | 0.588837 |
| NCK2     | 7.71927 | 0.690041 |
| NCKAP1   | 5.41607 | 1.06428  |
| NCKAP1L  | 6.99621 | 0.528739 |
| NCOA1    | 6.82149 | 0.509625 |
| NCOA2    | 6.47523 | 0.536196 |
| NCOA3    | 7.77502 | 0.661183 |
| NCOA4    | 10.0536 | 0.626198 |
| NCOA5    | 5.71132 | 0.481576 |
| NCOA7    | 6.08638 | 0.515954 |
| ND2      | 13.5158 | 0.414151 |
| ND6      | 8.5883  | 0.783739 |
| NDC1     | 6.33389 | 0.714724 |
| NDC80    | 5.58773 | 1.30695  |
| NDFIP1   | 8.17705 | 0.512942 |
| NDFIP2   | 5.89014 | 0.532178 |
| NDN      | 5.17922 | 1.15171  |
| NDNF     | 7.84769 | 1.93849  |
| NDNL2    | 6.52834 | 0.568013 |
| NDRG1    | 7.58142 | 0.797836 |
| NDRG3    | 5.77547 | 0.530127 |
| NDUFA1   | 11.0563 | 0.481559 |
| NDUFA12  | 9.8663  | 0.482109 |
| NDUFA13  | 10.4176 | 0.500962 |
| NDUFA3   | 10.3641 | 0.442301 |
| NDUFA4   | 11.3163 | 0.501397 |
| NDUFA5   | 6.86204 | 0.519465 |
| NDUFA6   | 8.07419 | 0.47827  |
| NDUFA8   | 9.26345 | 0.601533 |
| NDUFA9   | 8.85515 | 0.494765 |
| NDUFAB1  | 10.8865 | 0.441173 |
| NDUFAF1  | 8.15422 | 0.803451 |
| NDUFAF2  | 8.37002 | 0.551514 |
| NDUFAF3  | 8.42594 | 0.446742 |
| NDUFAF4  | 7.38854 | 0.717    |
| NDUFAF6  | 5.4701  | 0.41573  |
| NDUFB10  | 8.97104 | 0.430211 |
| NDUFB11  | 10.2882 | 0.405772 |
| NDUFB3   | 9.71298 | 0.460283 |
| NDUFB5   | 10.0901 | 0.580331 |
| NDUFB6   | 7.00849 | 0.406018 |
| NDUFB9   | 10.4644 | 0.492927 |

|               |         |          |
|---------------|---------|----------|
| NDUFC1        | 7.65644 | 0.456967 |
| NDUFC2-KCTD14 | 6.34622 | 0.444056 |
| NDUFS2        | 8.91175 | 0.615525 |
| NDUFS3        | 8.31611 | 0.426299 |
| NDUFS4        | 6.23167 | 0.479281 |
| NDUFS5        | 10.038  | 0.47477  |
| NDUFS6        | 9.29563 | 0.553237 |
| NDUFV2        | 9.47864 | 0.567376 |
| NDUFV3        | 7.59544 | 0.545931 |
| NEAT1         | 8.61682 | 0.706594 |
| NEB           | 5.6146  | 1.27833  |
| NECAP1        | 7.61036 | 0.555066 |
| NECAP2        | 6.41024 | 0.518471 |
| NEDD1         | 5.97671 | 0.607992 |
| NEDD4L        | 5.00087 | 0.510028 |
| NEDD8         | 9.58897 | 0.437655 |
| NEDD8-MDP1    | 7.12626 | 0.551959 |
| NEDD9         | 5.977   | 0.741484 |
| NEIL1         | 5.6485  | 0.443436 |
| NEK3          | 5.27984 | 0.556617 |
| NEK4          | 5.52779 | 0.41308  |
| NEK6          | 5.03116 | 0.425738 |
| NEK7          | 9.02103 | 0.936673 |
| NEK8          | 6.31601 | 0.448039 |
| NELFB         | 7.41662 | 0.512537 |
| NELFCD        | 8.20055 | 0.556463 |
| NELFE         | 8.93863 | 0.518316 |
| NELL2         | 4.82339 | 0.743878 |
| NEMF          | 6.93412 | 0.585023 |
| NEO1          | 5.33622 | 0.433507 |
| NES           | 5.84239 | 1.08398  |
| NET1          | 6.66034 | 1.05575  |
| NETO2         | 5.07866 | 1.02514  |
| NEU1          | 8.98043 | 0.584669 |
| NFAT5         | 5.99191 | 0.709744 |
| NFATC2IP      | 7.008   | 0.536837 |
| NFE2L1        | 8.04549 | 0.672671 |
| NFE2L3        | 5.79734 | 1.17806  |
| NFIC          | 5.39831 | 0.639106 |
| NFIL3         | 8.43149 | 1.00514  |
| NFKB1         | 7.5303  | 0.613558 |
| NFKB2         | 5.59423 | 0.403833 |
| NFKBIA        | 8.64078 | 0.776027 |
| NFKBIE        | 6.90185 | 0.787414 |
| NFKBIZ        | 10.1131 | 1.09344  |
| NFS1          | 5.5241  | 0.439736 |
| NFU1          | 8.14229 | 0.501803 |

|           |         |          |
|-----------|---------|----------|
| NFX1      | 6.74378 | 0.492933 |
| NFXL1     | 6.66205 | 0.704597 |
| NFYB      | 5.48296 | 0.535466 |
| NGFRAP1   | 6.93193 | 1.61699  |
| NGLY1     | 8.54849 | 0.484404 |
| NGRN      | 7.99709 | 0.445803 |
| NHEJ1     | 6.14514 | 0.441655 |
| NHLRC3    | 5.67345 | 0.625523 |
| NHP2      | 10.5637 | 0.583787 |
| NHP2P2    | 7.75675 | 0.484822 |
| NICN1     | 6.5384  | 0.450278 |
| NID2      | 5.02484 | 1.97226  |
| NIF3L1    | 7.44472 | 0.705926 |
| NIFK      | 6.76261 | 0.462276 |
| NIN       | 4.91557 | 0.446011 |
| NINJ1     | 6.76345 | 0.601566 |
| NINJ2     | 5.1067  | 0.627232 |
| NINL      | 5.31109 | 0.613504 |
| NIP7      | 5.68729 | 0.559813 |
| NIPA1     | 5.50924 | 0.506937 |
| NIPA2     | 8.90275 | 0.453409 |
| NIPAL2    | 5.24435 | 0.520765 |
| NIPAL4    | 5.40305 | 0.557092 |
| NIPBL     | 7.08842 | 0.579445 |
| NIPSNAP3A | 6.03759 | 1.1008   |
| NIT2      | 8.55051 | 0.598827 |
| NKAP      | 6.40285 | 0.651756 |
| NKIRAS1   | 6.16213 | 0.812972 |
| NKRF      | 6.66301 | 0.56198  |
| NKTR      | 6.37561 | 0.51638  |
| NKX1-1    | 5.62095 | 0.418773 |
| NKX6-3    | 5.57563 | 0.430888 |
| NLE1      | 5.24553 | 0.410918 |
| NLGN4X    | 5.8906  | 1.78652  |
| NLK       | 6.51212 | 0.845223 |
| NLRC5     | 6.98434 | 0.805505 |
| NLRP11    | 4.86192 | 1.24293  |
| NMB       | 6.86516 | 0.620026 |
| NMD3      | 8.43221 | 0.522368 |
| NME1      | 10.0691 | 0.725961 |
| NME1-NME2 | 11.4652 | 0.547084 |
| NME2      | 11.4652 | 0.547084 |
| NME3      | 7.30498 | 0.440978 |
| NME4      | 7.41102 | 0.817396 |
| NME6      | 5.60471 | 0.530562 |
| NME7      | 6.10525 | 0.846177 |
| NMI       | 7.33063 | 0.806669 |

|              |         |          |
|--------------|---------|----------|
| NMRAL1       | 6.69898 | 0.639475 |
| NMRK1        | 6.70468 | 0.562449 |
| NNT          | 6.21307 | 0.460573 |
| NNT-AS1      | 6.38948 | 0.771891 |
| NOA1         | 8.37126 | 0.619769 |
| NOB1         | 7.64952 | 0.727349 |
| NOC3L        | 7.65457 | 0.829035 |
| NOL11        | 7.71649 | 0.662206 |
| NOL4         | 4.9312  | 1.54527  |
| NOL7         | 9.27561 | 0.435652 |
| NOL8         | 8.37555 | 0.577783 |
| NOLC1        | 8.08961 | 0.494536 |
| NOM1         | 5.72183 | 0.498534 |
| NOMO1        | 10.0789 | 0.712953 |
| NOMO2        | 10.0789 | 0.712953 |
| NOMO3        | 8.98865 | 0.562616 |
| NONO         | 9.29576 | 0.456143 |
| NOP10        | 10.6954 | 0.503859 |
| NOP14        | 7.17435 | 0.525547 |
| NOP16        | 6.16578 | 0.415712 |
| NOP2         | 7.44996 | 0.578495 |
| NOP56        | 7.98352 | 0.525796 |
| NOP58        | 10.4349 | 0.553616 |
| NOSIP        | 7.80147 | 0.443388 |
| NOTCH2       | 6.52217 | 0.716799 |
| NOTCH2NL     | 7.74076 | 0.954125 |
| NPAT         | 5.82705 | 0.480778 |
| NPC2         | 10.198  | 0.978709 |
| NPDC1        | 5.98775 | 0.709236 |
| NPEPPS       | 6.34621 | 0.497243 |
| NPHP3        | 5.72073 | 0.478734 |
| NPHP3-ACAD11 | 6.58554 | 0.471767 |
| NPIPB11      | 5.72441 | 0.420936 |
| NPIPB15      | 6.13302 | 0.495379 |
| NPIPB3       | 6.10631 | 0.427282 |
| NPIPB4       | 6.4516  | 0.573535 |
| NPIPB5       | 6.4516  | 0.573535 |
| NPIPB6       | 5.18105 | 0.406342 |
| NPLOC4       | 7.58781 | 0.426421 |
| NPM1         | 11.4948 | 0.62017  |
| NPM1P22      | 6.87644 | 0.459498 |
| NPM3         | 6.30462 | 0.701423 |
| NPPA         | 6.34611 | 0.402167 |
| NPTN         | 8.79028 | 0.887119 |
| NPTN-IT1     | 5.19018 | 0.660221 |
| NQO2         | 5.68301 | 0.424726 |
| NROB2        | 6.16723 | 0.402284 |

|         |         |          |
|---------|---------|----------|
| NR1D1   | 6.47481 | 0.520906 |
| NR1D2   | 7.6895  | 0.84383  |
| NR1H2   | 7.17495 | 0.424426 |
| NR2C2   | 5.87897 | 0.467491 |
| NR3C1   | 8.88085 | 0.848008 |
| NR4A1   | 6.75436 | 0.526414 |
| NR4A2   | 8.12339 | 1.20061  |
| NRAS    | 7.77947 | 0.804407 |
| NRBF2   | 6.54698 | 0.613079 |
| NRBP1   | 7.06239 | 0.409073 |
| NRBP2   | 6.18235 | 0.577309 |
| NRD1    | 7.9511  | 0.586182 |
| NRG2    | 5.13228 | 0.672499 |
| NRG3    | 6.51643 | 1.35131  |
| NRGN    | 5.17042 | 0.750079 |
| NRM     | 6.66115 | 0.412389 |
| NRROS   | 6.33169 | 0.679541 |
| NSA2    | 11.1859 | 0.650011 |
| NSDHL   | 6.08101 | 0.633764 |
| NSMAF   | 5.53667 | 0.593035 |
| NSMCE1  | 8.03901 | 0.763559 |
| NSMCE2  | 8.23525 | 0.625968 |
| NSRP1   | 7.51971 | 0.484348 |
| NSUN2   | 8.03954 | 0.542864 |
| NSUN5   | 8.10073 | 0.462247 |
| NSUN5P1 | 8.7269  | 0.510139 |
| NSUN5P2 | 8.89817 | 0.522267 |
| NSUN6   | 6.47893 | 0.594468 |
| NT5C2   | 7.64848 | 0.592232 |
| NT5C3A  | 9.32741 | 0.734744 |
| NT5C3B  | 8.3789  | 0.599839 |
| NT5DC1  | 5.89938 | 0.483731 |
| NT5DC2  | 5.33672 | 0.483183 |
| NTAN1   | 7.44359 | 0.936443 |
| NTHL1   | 6.28148 | 0.636558 |
| NTPCR   | 6.20308 | 0.413973 |
| NTRK3   | 4.81385 | 0.474483 |
| NUAK2   | 7.55488 | 0.89986  |
| NUBP1   | 7.0089  | 0.503599 |
| NUBPL   | 5.82948 | 0.528548 |
| NUCB1   | 8.03205 | 0.577978 |
| NUCB2   | 7.88531 | 0.787697 |
| NUCKS1  | 7.41    | 0.633172 |
| NUDCD1  | 5.50724 | 0.577116 |
| NUDT1   | 6.49295 | 0.71588  |
| NUDT15  | 5.3563  | 0.660795 |
| NUDT18  | 5.95688 | 0.437295 |

|         |         |          |
|---------|---------|----------|
| NUDT19  | 6.91832 | 0.760965 |
| NUDT2   | 7.1847  | 0.499359 |
| NUDT21  | 6.75256 | 0.702572 |
| NUDT3   | 6.61804 | 0.442867 |
| NUDT4P1 | 7.99093 | 0.556363 |
| NUDT4P2 | 8.2909  | 0.538674 |
| NUDT5   | 7.41969 | 0.583862 |
| NUDT6   | 5.88068 | 0.55814  |
| NUDT9   | 7.66977 | 0.602892 |
| NUFIP2  | 7.243   | 0.537081 |
| NUMB    | 5.30655 | 0.535772 |
| NUP107  | 7.31992 | 0.741613 |
| NUP133  | 5.87724 | 0.611936 |
| NUP153  | 5.4936  | 0.486006 |
| NUP155  | 6.36505 | 0.688291 |
| NUP160  | 5.74614 | 0.575524 |
| NUP205  | 5.63937 | 0.495991 |
| NUP210  | 7.25974 | 0.438447 |
| NUP35   | 7.49583 | 0.852151 |
| NUP37   | 6.48683 | 0.470366 |
| NUP43   | 6.10284 | 0.687547 |
| NUP85   | 6.59646 | 0.72658  |
| NUP88   | 6.73488 | 0.418071 |
| NUP98   | 6.16364 | 0.458902 |
| NUPL1   | 5.20035 | 0.529    |
| NUPL2   | 7.13221 | 0.564887 |
| NUPR1   | 5.21056 | 0.457608 |
| NUS1    | 7.47027 | 0.587028 |
| NUS1P3  | 5.85006 | 0.546283 |
| NUSAP1  | 6.40948 | 1.44189  |
| NVL     | 6.95978 | 0.613066 |
| NXF1    | 8.64099 | 0.649797 |
| NXPE3   | 7.04379 | 1.14719  |
| NXPE4   | 6.08885 | 0.931804 |
| NXT1    | 7.99791 | 0.471447 |
| NXT2    | 6.73302 | 0.944148 |
| OARD1   | 7.04942 | 0.539487 |
| OAS1    | 7.31051 | 0.971016 |
| OAS2    | 6.88958 | 0.727138 |
| OAS3    | 5.2083  | 0.508508 |
| OASL    | 5.28874 | 0.487799 |
| OAT     | 9.34029 | 0.994185 |
| OBP2B   | 4.83288 | 0.421341 |
| OCA2    | 5.52984 | 0.437511 |
| OCIAD2  | 8.53375 | 0.436469 |
| OCLN    | 5.27134 | 0.606242 |
| OCRL    | 5.86872 | 0.459843 |

|            |         |          |
|------------|---------|----------|
| ODC1       | 11.3758 | 0.482927 |
| ODF2       | 6.04926 | 0.459816 |
| OFD1       | 6.87558 | 0.645195 |
| OGFOD1     | 6.33296 | 0.401265 |
| OGFOD3     | 7.31397 | 0.483437 |
| OGFRL1     | 5.58488 | 0.769897 |
| OGT        | 8.79607 | 0.567604 |
| OIP5       | 4.8627  | 1.14552  |
| OIP5-AS1   | 8.03539 | 0.577443 |
| OMA1       | 7.74972 | 0.622633 |
| OPA1       | 5.09251 | 0.490606 |
| OPHN1      | 9.62906 | 0.468874 |
| OPN3       | 6.49989 | 1.00642  |
| OPTN       | 6.22158 | 0.613444 |
| OR7E12P    | 5.53601 | 0.431914 |
| OR7E37P    | 6.91199 | 0.600376 |
| OR7E47P    | 5.18288 | 0.432811 |
| ORAI1      | 6.14751 | 0.444939 |
| ORAI3      | 7.05254 | 0.579912 |
| ORC2       | 5.99823 | 0.644829 |
| ORC3       | 7.08923 | 0.663453 |
| ORC4       | 6.02106 | 0.48262  |
| ORC5       | 5.07183 | 0.522899 |
| ORC6       | 6.43149 | 0.557513 |
| ORMDL1     | 8.10265 | 0.47367  |
| ORMDL2     | 9.10408 | 0.55379  |
| ORMDL3     | 7.69698 | 0.485061 |
| OS9        | 9.69512 | 0.53251  |
| OSBP       | 7.39242 | 0.439725 |
| OSBPL10    | 5.89397 | 0.585366 |
| OSBPL11    | 5.98863 | 0.640804 |
| OSBPL1A    | 4.82939 | 0.945239 |
| OSBPL3     | 5.5788  | 1.16991  |
| OSBPL8     | 6.50527 | 0.504781 |
| OSBPL9     | 9.08553 | 0.520587 |
| OSER1      | 7.22275 | 0.485621 |
| OSGEP      | 6.52805 | 0.437884 |
| OSGEPL1    | 6.41798 | 0.614645 |
| OST4       | 11.3242 | 0.410692 |
| OSTC       | 10.7907 | 0.461199 |
| OSTF1      | 7.77972 | 0.597706 |
| OSTM1      | 6.12007 | 0.648289 |
| OTUD1      | 8.10225 | 0.830443 |
| OTUD4      | 5.51881 | 0.434144 |
| OTUD6B     | 6.62447 | 0.81636  |
| OTUD6B-AS1 | 6.90456 | 0.571556 |
| OVAAL      | 4.90834 | 0.919506 |

|               |         |          |
|---------------|---------|----------|
| OVGP1         | 6.52161 | 0.440698 |
| OVOL1         | 5.20388 | 0.644252 |
| OVOL3         | 5.1636  | 0.524181 |
| OVOS          | 7.89465 | 1.80851  |
| OVOS2         | 7.89465 | 1.80851  |
| OXA1L         | 9.56729 | 0.509804 |
| OXCT1         | 7.74615 | 0.584504 |
| OXLD1         | 6.93792 | 0.443167 |
| OXNAD1        | 7.26225 | 0.550123 |
| OXR1          | 7.18642 | 0.54439  |
| OXSM          | 7.74616 | 0.601803 |
| OXSR1         | 7.07359 | 0.540567 |
| P2RX1         | 7.66377 | 1.33261  |
| P2RX4         | 7.81113 | 0.593319 |
| P2RX5         | 6.92247 | 0.725322 |
| P2RX5-TAX1BP3 | 5.92055 | 0.606799 |
| P2RX7         | 5.7226  | 0.964851 |
| P2RY10        | 6.32241 | 1.09384  |
| P2RY6         | 5.39289 | 0.882121 |
| P2RY8         | 8.8742  | 0.828233 |
| P4HA1         | 5.76704 | 0.481994 |
| P4HA2         | 4.97225 | 0.630744 |
| P4HB          | 10.4312 | 0.507432 |
| P4HTM         | 8.38665 | 0.707955 |
| PA2G4         | 7.05336 | 0.466808 |
| PAAF1         | 6.87849 | 0.41898  |
| PABPC1L       | 5.43577 | 0.446203 |
| PABPC4        | 10.6601 | 0.707292 |
| PABPN1        | 7.52931 | 0.490364 |
| PACSIN1       | 5.00629 | 0.405947 |
| PACSIN3       | 4.93952 | 0.407897 |
| PAFAH1B1      | 6.43372 | 0.542513 |
| PAFAH1B3      | 7.22649 | 0.568191 |
| PAGE5         | 5.18019 | 0.425679 |
| PAICS         | 6.9681  | 0.485416 |
| PAIP1         | 7.52972 | 0.534304 |
| PAIP2B        | 7.24766 | 0.959668 |
| PAK1          | 5.66386 | 0.617736 |
| PAK1IP1       | 7.02638 | 0.666866 |
| PAK2          | 5.75983 | 0.440392 |
| PALB2         | 6.06915 | 0.663627 |
| PALD1         | 6.30451 | 0.912398 |
| PALM2-AKAP2   | 8.78727 | 0.592077 |
| PAM           | 8.4997  | 0.73689  |
| PAM16         | 7.51656 | 0.482488 |
| PAN2          | 7.30158 | 0.632773 |
| PAN3          | 8.13498 | 0.767484 |



|            |         |          |
|------------|---------|----------|
| PANK3      | 6.07319 | 0.469524 |
| PANK4      | 6.45343 | 0.48781  |
| PANX1      | 5.35129 | 0.518211 |
| PAPD4      | 6.78281 | 0.696777 |
| PAPD5      | 6.46395 | 0.657902 |
| PAPD7      | 8.14062 | 0.745272 |
| PAPOLA     | 7.87962 | 0.505968 |
| PAPSS1     | 9.61605 | 0.596801 |
| PAPSS2     | 5.5581  | 1.11331  |
| PAQR6      | 6.61626 | 0.618741 |
| PARD3      | 5.96741 | 0.891084 |
| PARG       | 6.48947 | 0.41464  |
| PARK7      | 11.4736 | 0.419678 |
| PARM1      | 7.4339  | 1.30141  |
| PARN       | 7.48698 | 0.509871 |
| PARP1      | 8.46299 | 0.661716 |
| PARP12     | 7.52664 | 0.814764 |
| PARP14     | 5.81723 | 0.528323 |
| PARP16     | 7.30183 | 0.402283 |
| PARP2      | 7.5213  | 0.515913 |
| PARP3      | 6.01262 | 0.43649  |
| PARP4      | 7.65039 | 0.665028 |
| PARP8      | 6.35606 | 0.861755 |
| PARP9      | 6.44637 | 0.847856 |
| PARS2      | 5.44475 | 0.442442 |
| PARVB      | 5.46844 | 0.428557 |
| PARVG      | 5.41363 | 0.492322 |
| PATL2      | 6.03637 | 0.4569   |
| PAWR       | 5.05674 | 0.478304 |
| PAX5       | 5.96162 | 0.836797 |
| PAXBP1     | 6.51665 | 0.583491 |
| PAXIP1     | 6.77027 | 0.735955 |
| PAXIP1-AS1 | 7.28283 | 0.743712 |
| PBDC1      | 6.47271 | 0.571206 |
| PBK        | 5.05936 | 1.44673  |
| PBX3       | 4.85806 | 0.720619 |
| PBXIP1     | 7.76902 | 0.893095 |
| PC         | 4.82418 | 0.472837 |
| PCAT6      | 5.52216 | 0.780045 |
| PCBD1      | 6.80084 | 0.534082 |
| PCBP1      | 9.36248 | 0.509724 |
| PCBP2      | 7.27484 | 0.520353 |
| PCBP3      | 5.95499 | 0.509567 |
| PCBP4      | 6.72275 | 0.483631 |
| PCDHGA1    | 5.89027 | 0.518407 |
| PCDHGA10   | 5.68721 | 0.502669 |
| PCDHGA11   | 5.47551 | 0.46324  |

|            |         |          |
|------------|---------|----------|
| PCDHGA12   | 5.83864 | 0.541544 |
| PCDHGA2    | 6.24984 | 0.618852 |
| PCDHGA3    | 5.51554 | 0.44255  |
| PCDHGA4    | 6.09252 | 0.556796 |
| PCDHGA5    | 5.83864 | 0.541544 |
| PCDHGA6    | 5.83864 | 0.541544 |
| PCDHGA7    | 6.24984 | 0.618852 |
| PCDHGA8    | 5.94204 | 0.519614 |
| PCDHGA9    | 5.93155 | 0.513882 |
| PCDHGB1    | 6.24984 | 0.618852 |
| PCDHGB2    | 6.24984 | 0.618852 |
| PCDHGB3    | 6.24984 | 0.618852 |
| PCDHGB4    | 6.24984 | 0.618852 |
| PCDHGB5    | 6.15884 | 0.516403 |
| PCDHGB6    | 5.69603 | 0.506516 |
| PCDHGB7    | 5.34088 | 0.451489 |
| PCDHGC4    | 5.4969  | 0.429308 |
| PCDHGC5    | 5.40178 | 0.428276 |
| PCED1B     | 6.26342 | 1.07141  |
| PCF11      | 7.70608 | 0.529854 |
| PCGF1      | 6.96248 | 0.464882 |
| PCGF5      | 6.93579 | 0.65186  |
| PCGF6      | 5.62581 | 0.492865 |
| PCID2      | 6.32542 | 0.495377 |
| PCK2       | 7.28524 | 0.813065 |
| PCM1       | 6.16522 | 0.457915 |
| PCMT1      | 8.09378 | 0.716255 |
| PCMTD1     | 7.83215 | 0.580944 |
| PCNA       | 8.22805 | 1.22888  |
| PCNP       | 7.81102 | 0.434247 |
| PCNXL3     | 5.89163 | 0.435851 |
| PCOLCE-AS1 | 6.16288 | 0.541764 |
| PCSK1N     | 4.88518 | 0.631244 |
| PCTP       | 6.91439 | 0.607784 |
| PCYOX1     | 7.58265 | 0.769483 |
| PCYOX1L    | 5.42759 | 0.789248 |
| PDCD10     | 9.32784 | 0.669904 |
| PDCD11     | 6.56674 | 0.412636 |
| PDCD2      | 5.63651 | 0.414982 |
| PDCD2L     | 7.38668 | 0.853882 |
| PDCD4      | 8.03146 | 1.00137  |
| PDCD4-AS1  | 5.04694 | 0.608828 |
| PDCD5      | 6.51503 | 0.501102 |
| PDCD6IP    | 7.5624  | 0.557837 |
| PDCD7      | 6.29301 | 0.431129 |
| PDCL       | 6.54032 | 0.472471 |
| PDCL3      | 7.50006 | 0.749816 |

|         |         |          |
|---------|---------|----------|
| PDCL3P4 | 7.50006 | 0.749816 |
| PDE4B   | 8.07764 | 1.08568  |
| PDE7A   | 4.94586 | 0.50337  |
| PDE8A   | 5.86505 | 0.417244 |
| PDF     | 7.05945 | 0.506322 |
| PDHA1   | 7.35431 | 0.453792 |
| PDHB    | 8.68958 | 0.619405 |
| PDHX    | 6.86242 | 0.693858 |
| PDIA3   | 8.0965  | 0.712721 |
| PDIA4   | 9.36727 | 0.725424 |
| PDIA5   | 9.35822 | 0.682919 |
| PDIA6   | 11.1626 | 0.523971 |
| PDIK1L  | 6.64633 | 0.859684 |
| PDK1    | 9.42347 | 0.929583 |
| PDLIM1  | 8.69569 | 1.26844  |
| PDLIM3  | 4.89549 | 0.852044 |
| PDP1    | 6.50743 | 0.711679 |
| PDP2    | 5.177   | 0.467289 |
| PDS5A   | 6.75822 | 0.412518 |
| PDSS1   | 5.02612 | 0.428191 |
| PDSS2   | 5.70012 | 0.548906 |
| PDXDC2P | 5.35839 | 0.469753 |
| PDXP    | 6.02154 | 0.487561 |
| PDZD11  | 8.42258 | 0.47182  |
| PDZD8   | 5.12775 | 0.483122 |
| PDZRN4  | 5.90131 | 1.59446  |
| PEA15   | 6.92836 | 0.889869 |
| PEAK1   | 6.3448  | 0.41784  |
| PEAR1   | 5.21205 | 0.418453 |
| PEBP1   | 9.51241 | 0.623075 |
| PECAM1  | 8.38598 | 0.945244 |
| PEF1    | 7.61359 | 0.507994 |
| PELI1   | 10.6137 | 1.18535  |
| PEMT    | 6.78099 | 0.531548 |
| PER1    | 6.93696 | 0.662275 |
| PER2    | 5.35017 | 0.459767 |
| PERP    | 5.69546 | 0.795352 |
| PET100  | 9.68633 | 0.43413  |
| PET112  | 6.18852 | 0.430688 |
| PEX1    | 5.71292 | 0.514458 |
| PEX11B  | 7.69113 | 0.722716 |
| PEX12   | 6.31825 | 0.720718 |
| PEX19   | 6.81677 | 0.542299 |
| PEX2    | 6.13507 | 0.513774 |
| PEX3    | 5.79802 | 0.597091 |
| PEX6    | 5.22827 | 0.499327 |
| PEX7    | 5.49763 | 0.539921 |

|          |         |          |
|----------|---------|----------|
| PF4      | 6.93444 | 1.41844  |
| PFAS     | 6.42008 | 0.789495 |
| PFDN2    | 8.38327 | 0.530849 |
| PFDN5    | 10.8793 | 0.437308 |
| PFKFB2   | 4.8515  | 0.492962 |
| PFKFB3   | 4.90945 | 0.982809 |
| PFKM     | 7.58899 | 0.798671 |
| PFN1     | 9.26533 | 0.691708 |
| PFN2     | 7.46697 | 1.3705   |
| PGAP2    | 7.26224 | 0.494234 |
| PGGT1B   | 5.97628 | 0.579452 |
| PGK1     | 7.56804 | 0.45142  |
| PGLYRP1  | 5.75131 | 0.648164 |
| PGM1     | 8.01973 | 0.528617 |
| PGM2     | 5.89867 | 0.53268  |
| PGM3     | 7.02018 | 0.783053 |
| PGM5-AS1 | 5.5084  | 0.418075 |
| PGRMC1   | 7.67587 | 0.650159 |
| PGRMC2   | 8.18857 | 0.673226 |
| PHACTR1  | 6.01923 | 1.372    |
| PHACTR4  | 6.30618 | 0.529636 |
| PHAX     | 6.86367 | 0.67568  |
| PHB      | 7.99045 | 0.442704 |
| PHB2     | 10.7972 | 0.532148 |
| PHC3     | 5.99624 | 0.406006 |
| PHF1     | 7.7188  | 0.523332 |
| PHF10    | 6.69773 | 0.587628 |
| PHF11    | 6.09372 | 0.511951 |
| PHF13    | 6.59052 | 0.669211 |
| PHF14    | 5.3331  | 0.486581 |
| PHF19    | 6.29818 | 0.862299 |
| PHF23    | 6.24715 | 0.528657 |
| PHF5A    | 7.93433 | 0.482879 |
| PHF6     | 6.2013  | 0.475891 |
| PHGDH    | 8.37395 | 0.618246 |
| PHKB     | 5.29804 | 0.515993 |
| PHLDA1   | 5.68076 | 1.3128   |
| PHLDA3   | 6.07909 | 0.408694 |
| PHLPP2   | 5.04138 | 0.506739 |
| PHPT1    | 8.47444 | 0.460702 |
| PHTF1    | 5.05955 | 0.565136 |
| PHTF2    | 5.08425 | 0.436387 |
| PHYH     | 6.97903 | 1.05333  |
| PHYHD1   | 4.93896 | 0.81315  |
| PI16     | 6.00266 | 0.415117 |
| PI4K2B   | 7.9252  | 0.563031 |
| PI4KA    | 7.19336 | 0.496392 |

|            |         |          |
|------------|---------|----------|
| PI4KAP1    | 8.20654 | 0.505611 |
| PI4KAP2    | 8.20654 | 0.505611 |
| PIAS1      | 8.17583 | 0.661461 |
| PIAS3      | 6.32143 | 0.472762 |
| PIBF1      | 5.35096 | 0.751013 |
| PICALM     | 6.69831 | 0.527659 |
| PIGA       | 5.97612 | 0.860234 |
| PIGB       | 5.77155 | 0.640903 |
| PIGC       | 6.08403 | 0.40995  |
| PIGF       | 8.05097 | 0.520043 |
| PIGH       | 6.26509 | 0.704977 |
| PIGK       | 6.4821  | 0.468789 |
| PIGM       | 5.86728 | 0.685974 |
| PIGN       | 5.69627 | 0.667911 |
| PIGP       | 10.0045 | 0.585734 |
| PIGU       | 6.88677 | 0.616748 |
| PIGV       | 6.48533 | 0.490594 |
| PIGW       | 6.35029 | 0.813133 |
| PIGY       | 8.96235 | 0.483837 |
| PIK3AP1    | 6.0139  | 1.08962  |
| PIK3C2A    | 6.88888 | 0.598284 |
| PIK3C2B    | 6.6892  | 0.537917 |
| PIK3CA     | 5.8202  | 0.532797 |
| PIK3CB     | 5.67649 | 0.478402 |
| PIK3CD     | 5.52662 | 0.41367  |
| PIK3CG     | 6.1206  | 0.919192 |
| PIK3IP1    | 6.1829  | 0.446952 |
| PIK3R1     | 6.53225 | 0.661444 |
| PIK3R2     | 6.67003 | 0.404942 |
| PIK3R3     | 4.94111 | 0.775958 |
| PIKFYVE    | 5.77163 | 0.410125 |
| PILRA      | 4.84238 | 0.412607 |
| PILRB      | 7.8853  | 0.714721 |
| PIM1       | 7.18823 | 0.767284 |
| PIM2       | 9.79789 | 0.81871  |
| PIM3       | 7.64894 | 0.784584 |
| PIN1       | 7.08649 | 0.467337 |
| PINK1      | 7.17696 | 0.518917 |
| PINLYP     | 6.3674  | 0.800082 |
| PINX1      | 6.5544  | 0.447538 |
| PIP4K2A    | 6.64143 | 0.611632 |
| PIP5K1A    | 6.30989 | 0.413007 |
| PIP5K1B    | 6.54558 | 0.570822 |
| PIP5K1C    | 6.96862 | 0.418534 |
| PIP5KL1    | 5.13246 | 0.4154   |
| PITPNA     | 6.97869 | 0.426201 |
| PITPNA-AS1 | 7.58552 | 0.651077 |

|          |         |          |
|----------|---------|----------|
| PITPNB   | 8.98796 | 0.496524 |
| PJA1     | 7.93395 | 0.559275 |
| PJA2     | 9.28801 | 0.590191 |
| PKD2     | 6.23567 | 0.882381 |
| PKHD1L1  | 6.6068  | 1.04396  |
| PKIG     | 5.57399 | 0.936935 |
| PKM      | 7.17278 | 0.457222 |
| PKN1     | 6.20713 | 0.426674 |
| PKN2     | 5.95077 | 0.584135 |
| PKP4     | 5.7578  | 0.65722  |
| PLA2G12A | 6.93642 | 0.529459 |
| PLA2G15  | 5.4634  | 0.492036 |
| PLA2G16  | 6.99035 | 0.74508  |
| PLA2G2D  | 5.14521 | 0.47635  |
| PLA2G4A  | 5.78536 | 1.23883  |
| PLAA     | 5.50749 | 0.500487 |
| PLAC8    | 9.17232 | 1.60291  |
| PLAGL2   | 5.49833 | 0.565663 |
| PLAUR    | 4.95797 | 0.550716 |
| PLBD1    | 5.30578 | 1.16795  |
| PLBD2    | 6.09906 | 0.434371 |
| PLCB3    | 5.91202 | 0.427681 |
| PLCG2    | 6.45013 | 0.578332 |
| PLCL2    | 6.26369 | 0.512304 |
| PLCXD1   | 6.21357 | 0.408348 |
| PLCXD2   | 5.29668 | 0.530374 |
| PLD3     | 7.80868 | 0.7045   |
| PLD4     | 4.97466 | 0.832878 |
| PLD6     | 5.30982 | 0.448109 |
| PLEC     | 6.16879 | 0.406718 |
| PLEK     | 7.17645 | 1.29893  |
| PLEKHA2  | 6.23257 | 0.761498 |
| PLEKHA4  | 4.90226 | 0.414461 |
| PLEKHA7  | 4.90457 | 0.817016 |
| PLEKHF2  | 7.27749 | 1.31788  |
| PLEKHG2  | 5.75931 | 0.407301 |
| PLEKHG4  | 5.52753 | 0.609544 |
| PLEKHM3  | 4.93658 | 0.441287 |
| PLEKHN1  | 7.00891 | 0.419783 |
| PLEKHO1  | 5.69952 | 1.06709  |
| PLGRKT   | 7.2257  | 0.63843  |
| PLIN2    | 5.83975 | 0.483752 |
| PLIN3    | 7.39625 | 0.44318  |
| PLIN4    | 5.85486 | 0.484777 |
| PLK1     | 5.25276 | 0.447056 |
| PLK1S1   | 6.02241 | 0.427617 |
| PLK2     | 5.01104 | 1.16908  |

|              |         |          |
|--------------|---------|----------|
| PLOD1        | 6.39798 | 0.50866  |
| PLOD3        | 8.55164 | 0.586228 |
| PLP2         | 10.2497 | 0.731236 |
| PLRG1        | 6.34858 | 0.633835 |
| PLSCR1       | 5.63239 | 0.79444  |
| PLSCR3       | 7.49268 | 0.445814 |
| PLTP         | 5.94049 | 1.38776  |
| PLXNB2       | 5.56975 | 0.467513 |
| PLXNC1       | 6.95266 | 0.601416 |
| PM20D2       | 6.65383 | 0.623797 |
| PMAIP1       | 7.93932 | 2.49542  |
| PMEPA1       | 6.9318  | 0.856739 |
| PMF1         | 6.21097 | 0.625262 |
| PMF1-BGLAP   | 5.2343  | 0.958823 |
| PMM1         | 6.31381 | 0.421642 |
| PMM2         | 7.15159 | 0.48866  |
| PMPCA        | 8.14261 | 0.441338 |
| PMS2P1       | 6.63818 | 0.408421 |
| PMS2P5       | 6.26658 | 0.460177 |
| PMS2P8       | 6.42329 | 0.437093 |
| PMVK         | 8.24325 | 0.633447 |
| PNISR        | 7.95934 | 0.63516  |
| PNKP         | 7.51027 | 0.469034 |
| PNMA1        | 6.16596 | 1.15124  |
| PNN          | 8.447   | 0.450301 |
| PNOC         | 8.88122 | 1.06263  |
| PNP          | 8.56943 | 1.15482  |
| PNPLA4       | 5.62873 | 0.462843 |
| PNPLA6       | 6.3619  | 0.440599 |
| PNPLA8       | 8.76454 | 0.578646 |
| PNPO         | 6.56893 | 0.473108 |
| PNPT1        | 8.39481 | 0.656918 |
| PNRC1        | 10.4695 | 0.442788 |
| PNRC2        | 7.82797 | 0.664298 |
| POC1B        | 7.39029 | 0.655264 |
| POC1B-GALNT4 | 5.43221 | 0.585714 |
| POC5         | 6.94189 | 0.641603 |
| PODXL        | 5.06878 | 0.60165  |
| PODXL2       | 4.80754 | 0.508092 |
| POGK         | 5.76859 | 0.565434 |
| POGLUT1      | 7.44069 | 0.682531 |
| POGZ         | 6.50777 | 0.418955 |
| POLA1        | 5.55597 | 0.732359 |
| POLB         | 5.99603 | 0.429283 |
| POLD1        | 6.06758 | 0.503562 |
| POLD2        | 7.64213 | 0.622971 |
| POLD4        | 7.39022 | 0.440891 |

|          |         |          |
|----------|---------|----------|
| POLDIP2  | 7.25843 | 0.412339 |
| POLE     | 5.58462 | 0.416156 |
| POLE2    | 4.92908 | 0.893871 |
| POLE3    | 8.21713 | 0.735309 |
| POLG2    | 6.53737 | 0.554138 |
| POLK     | 5.94065 | 0.459741 |
| POLM     | 5.56283 | 0.481207 |
| POLQ     | 4.9452  | 0.745347 |
| POLR1B   | 6.00662 | 0.448035 |
| POLR1C   | 6.65959 | 0.535496 |
| POLR1D   | 8.08812 | 0.68615  |
| POLR2D   | 6.42136 | 0.454796 |
| POLR2E   | 8.02198 | 0.470772 |
| POLR2G   | 8.55869 | 0.603758 |
| POLR2H   | 8.30873 | 0.513215 |
| POLR2I   | 8.66932 | 0.419071 |
| POLR2J   | 7.88794 | 0.494671 |
| POLR2J2  | 7.11284 | 0.463492 |
| POLR2J3  | 7.28041 | 0.571769 |
| POLR2J4  | 5.94661 | 0.427486 |
| POLR2K   | 8.51382 | 0.504657 |
| POLR2M   | 6.19508 | 0.417484 |
| POLR3C   | 6.43596 | 0.622896 |
| POLR3D   | 6.3184  | 0.504303 |
| POLR3GL  | 7.90092 | 0.574689 |
| POM121C  | 7.71207 | 0.472802 |
| POMC     | 5.36078 | 0.577799 |
| POMGNT2  | 6.17708 | 0.552925 |
| POMP     | 7.32239 | 0.550963 |
| POMT1    | 5.90108 | 0.463268 |
| POMZP3   | 6.00452 | 0.743461 |
| PON2     | 6.45618 | 0.678999 |
| POP5     | 9.14055 | 0.541064 |
| POP7     | 7.36628 | 0.570767 |
| POR      | 6.03247 | 0.439333 |
| POT1     | 6.61273 | 0.690856 |
| POTEM    | 5.17681 | 0.93127  |
| POU2F2   | 6.6515  | 0.456827 |
| PP7080   | 5.77067 | 0.547369 |
| PPA1     | 11.1711 | 0.784025 |
| PPAP2A   | 6.89275 | 0.830876 |
| PPAP2B   | 5.66604 | 1.08661  |
| PPAPDC1B | 9.73469 | 0.7423   |
| PPAPDC2  | 5.85175 | 0.909226 |
| PPAPDC3  | 5.3099  | 0.550674 |
| PPAT     | 7.01466 | 0.68566  |
| PPBP     | 6.98425 | 2.29772  |



|          |         |          |
|----------|---------|----------|
| PPCDC    | 7.71888 | 0.845057 |
| PPDPF    | 7.32705 | 0.741157 |
| PPFIA1   | 6.30385 | 0.409389 |
| PPFIBP2  | 7.31217 | 0.698848 |
| PPIA     | 10.1414 | 0.403541 |
| PIIB     | 12.2559 | 0.48093  |
| PPID     | 6.38271 | 0.669036 |
| PPIF     | 7.6369  | 0.621348 |
| PPIG     | 7.12531 | 0.56687  |
| PPIH     | 7.49941 | 0.497427 |
| PPIL1    | 7.46828 | 0.789525 |
| PPIL3    | 8.45876 | 0.650144 |
| PPIL4    | 5.48722 | 0.787254 |
| PPIP5K1  | 5.33847 | 0.405999 |
| PPIP5K2  | 7.72612 | 0.616001 |
| PPM1A    | 6.16827 | 0.504666 |
| PPM1B    | 7.36871 | 0.529614 |
| PPM1D    | 5.3888  | 0.459885 |
| PPM1K    | 6.04395 | 0.570575 |
| PPM1M    | 6.30502 | 0.454942 |
| PPOX     | 5.60216 | 0.685207 |
| PPP1CA   | 9.31437 | 0.450535 |
| PPP1CB   | 8.2378  | 0.460193 |
| PPP1CC   | 11.0261 | 0.540465 |
| PPP1R10  | 6.65683 | 0.567292 |
| PPP1R12A | 7.10372 | 0.599259 |
| PPP1R14B | 7.82513 | 0.597974 |
| PPP1R14D | 4.89379 | 0.401606 |
| PPP1R15A | 9.21068 | 1.13032  |
| PPP1R15B | 9.72611 | 0.619948 |
| PPP1R16B | 5.8521  | 0.785219 |
| PPP1R18  | 7.40146 | 0.605228 |
| PPP1R2   | 7.72753 | 0.464936 |
| PPP1R21  | 6.14852 | 0.78502  |
| PPP1R26  | 6.6698  | 0.67579  |
| PPP1R35  | 7.08162 | 0.495368 |
| PPP1R3D  | 5.22834 | 0.552276 |
| PPP1R3E  | 6.1548  | 0.52021  |
| PPP1R8   | 7.83608 | 0.584406 |
| PPP2CA   | 6.68916 | 0.425895 |
| PPP2R1B  | 5.58436 | 0.48181  |
| PPP2R5C  | 7.16808 | 0.532566 |
| PPP2R5E  | 7.12257 | 0.579262 |
| PPP3CA   | 8.05237 | 0.641501 |
| PPP3CB   | 7.95913 | 0.453905 |
| PPP3R1   | 5.68961 | 0.609634 |
| PPP4C    | 7.82759 | 0.474675 |

|          |         |          |
|----------|---------|----------|
| PPP4R1   | 6.99058 | 0.65488  |
| PPP4R2   | 6.20038 | 0.451343 |
| PPP6C    | 8.20942 | 0.462    |
| PPP6R3   | 7.57977 | 0.453283 |
| PPRC1    | 6.82469 | 0.526873 |
| PPT1     | 9.85729 | 0.498453 |
| PPTC7    | 7.72891 | 0.628953 |
| PPWD1    | 5.71172 | 0.450711 |
| PQLC3    | 7.04189 | 0.462984 |
| PRADC1   | 7.07146 | 0.666356 |
| PRAF2    | 6.58585 | 0.657412 |
| PRAM1    | 5.18386 | 0.46419  |
| PRB1     | 6.64575 | 0.439797 |
| PRC1     | 6.24321 | 1.17666  |
| PRCC     | 6.47972 | 0.860719 |
| PRDM1    | 8.82474 | 0.524773 |
| PRDM12   | 5.44505 | 0.417917 |
| PRDM15   | 5.8368  | 0.770413 |
| PRDM2    | 5.94839 | 0.415211 |
| PRDM5    | 5.32528 | 0.877029 |
| PRDX1    | 10.3921 | 0.742606 |
| PRDX3    | 6.85858 | 0.417168 |
| PRDX4    | 12.2145 | 0.737642 |
| PRDX5    | 9.74505 | 0.483778 |
| PRDX6    | 9.54305 | 0.558467 |
| PREB     | 8.55301 | 0.670705 |
| PRELID1  | 8.82237 | 0.490585 |
| PREPL    | 6.5212  | 0.463314 |
| PREX1    | 5.51407 | 0.745399 |
| PRG2     | 6.71407 | 1.63968  |
| PRG3     | 5.1983  | 0.983561 |
| PRICKLE1 | 4.93184 | 0.453584 |
| PRICKLE2 | 5.38892 | 0.798654 |
| PRICKLE4 | 10.4631 | 0.412488 |
| PRIM1    | 6.98288 | 0.980482 |
| PRIMPOL  | 6.32554 | 0.646136 |
| PRKAB2   | 5.14015 | 0.517965 |
| PRKACB   | 6.61244 | 0.874261 |
| PRKAG1   | 7.96922 | 0.41892  |
| PRKAR1A  | 7.86963 | 0.539782 |
| PRKCB    | 5.91797 | 1.01218  |
| PRKCD    | 7.77075 | 0.761526 |
| PRKCI    | 6.31119 | 0.48224  |
| PRKCSH   | 8.99297 | 0.435325 |
| PRKCZ    | 6.31493 | 0.580045 |
| PRKD2    | 8.12727 | 0.55887  |
| PRKD3    | 7.31629 | 1.26237  |

|           |         |          |
|-----------|---------|----------|
| PRKDC     | 6.05485 | 0.528064 |
| PRKRA     | 7.59768 | 0.646867 |
| PRKRIR    | 8.84739 | 0.624993 |
| PRM2      | 5.47177 | 0.46462  |
| PRMT3     | 5.6796  | 1.01116  |
| PRMT5     | 7.32913 | 0.578211 |
| PRMT7     | 5.99001 | 0.412108 |
| PRMT9     | 6.32316 | 0.551544 |
| PRNP      | 7.95972 | 0.791298 |
| PRO2852   | 7.38822 | 0.899207 |
| PRODH     | 5.85032 | 0.491324 |
| PRORS1P   | 4.8989  | 0.726726 |
| PROSC     | 6.07345 | 0.402894 |
| PROSER1   | 6.31355 | 0.666287 |
| PRPF19    | 8.16802 | 0.478095 |
| PRPF3     | 6.89373 | 0.611713 |
| PRPF38A   | 5.95748 | 0.533047 |
| PRPF38B   | 7.1933  | 0.583383 |
| PRPF39    | 6.55211 | 0.752713 |
| PRPF4     | 7.8172  | 0.550211 |
| PRPF4B    | 7.72165 | 0.511268 |
| PRPF6     | 6.70306 | 0.42458  |
| PRPF8     | 8.62338 | 0.484497 |
| PRPS1     | 7.93406 | 0.67541  |
| PRPS2     | 6.94039 | 0.824501 |
| PRPSAP2   | 8.37293 | 0.547479 |
| PRR11     | 7.80274 | 0.648627 |
| PRR13     | 8.56696 | 0.437839 |
| PRR14     | 6.92654 | 0.424523 |
| PRR15     | 5.9035  | 1.43842  |
| PRR24     | 6.33727 | 0.453049 |
| PRR3      | 5.75353 | 0.499875 |
| PRR34-AS1 | 8.01291 | 1.47959  |
| PRR5      | 5.02391 | 0.70405  |
| PRR7      | 5.46768 | 0.56168  |
| PRRC1     | 8.50254 | 0.529969 |
| PRRC2C    | 7.92135 | 0.582743 |
| PRSS16    | 6.12762 | 0.835469 |
| PRUNE     | 5.78571 | 0.468956 |
| PSAP      | 11.1489 | 0.577355 |
| PSAPL1    | 5.30841 | 0.523798 |
| PSAT1     | 9.03935 | 1.25347  |
| PSEN2     | 6.61926 | 0.516175 |
| PSENN     | 8.15208 | 0.496461 |
| PSIP1     | 6.72887 | 0.501795 |
| PSMA1     | 10.4281 | 0.52287  |
| PSMA2     | 7.04977 | 0.414662 |

|           |         |          |
|-----------|---------|----------|
| PSMA4     | 9.37785 | 0.718027 |
| PSMA6     | 8.96169 | 0.557181 |
| PSMA7     | 8.60407 | 0.558968 |
| PSMB10    | 8.78299 | 0.605143 |
| PSMB3     | 10.2627 | 0.485179 |
| PSMB4     | 9.90357 | 0.445949 |
| PSMB5     | 8.83179 | 0.534959 |
| PSMB6     | 9.32667 | 0.531405 |
| PSMB7     | 8.24815 | 0.526633 |
| PSMB8     | 8.84848 | 0.650678 |
| PSMB8-AS1 | 6.69865 | 0.448787 |
| PSMB9     | 9.56186 | 0.612548 |
| PSMC1     | 9.13411 | 0.468244 |
| PSMC2     | 7.68161 | 0.550476 |
| PSMC3     | 8.82699 | 0.514967 |
| PSMC3IP   | 5.19311 | 0.469416 |
| PSMC4     | 8.20407 | 0.485487 |
| PSMC5     | 9.28093 | 0.455763 |
| PSMC6     | 8.80523 | 0.717791 |
| PSMD1     | 8.2851  | 0.447157 |
| PSMD10    | 8.73176 | 0.663409 |
| PSMD11    | 7.34303 | 0.473822 |
| PSMD12    | 7.7675  | 0.636206 |
| PSMD13    | 7.66431 | 0.443866 |
| PSMD14    | 9.54568 | 0.657007 |
| PSMD2     | 8.69948 | 0.465648 |
| PSMD3     | 7.3033  | 0.492913 |
| PSMD4     | 8.4309  | 0.464305 |
| PSMD5-AS1 | 5.40358 | 0.628676 |
| PSMD6-AS2 | 5.94392 | 0.431814 |
| PSMD7     | 8.1375  | 0.586984 |
| PSMD8     | 9.11342 | 0.46033  |
| PSME1     | 10.8991 | 0.448455 |
| PSME2     | 11.2072 | 0.649592 |
| PSME3     | 6.90866 | 0.482697 |
| PSME4     | 6.49033 | 0.55312  |
| PSMG1     | 7.27773 | 0.816275 |
| PSMG2     | 9.52322 | 0.582125 |
| PSMG3     | 7.06622 | 0.524522 |
| PSPC1     | 5.73911 | 0.409251 |
| PTAR1     | 6.21802 | 0.505578 |
| PTBP3     | 6.61731 | 0.551887 |
| PTCD2     | 6.40071 | 0.645633 |
| PTCD3     | 6.40333 | 0.468048 |
| PTCH1     | 4.89849 | 0.535915 |
| PTDSS1    | 8.83721 | 0.623017 |
| PTEN      | 6.6758  | 0.430014 |

|          |         |          |
|----------|---------|----------|
| PTENP1   | 8.72167 | 0.686615 |
| PTER     | 6.82256 | 0.639182 |
| PTGER4   | 5.11153 | 0.981692 |
| PTGES3   | 11.1501 | 0.456647 |
| PTGR2    | 6.01314 | 0.405648 |
| PTGS1    | 4.90969 | 0.459744 |
| PTGS2    | 5.68114 | 1.92476  |
| PTK2B    | 7.42252 | 0.590664 |
| PTMA     | 11.363  | 0.403433 |
| PTOV1    | 7.10294 | 0.525091 |
| PTP4A1   | 7.91352 | 0.534767 |
| PTP4A2   | 9.61865 | 0.570027 |
| PTP4A3   | 7.18255 | 1.44425  |
| PTPLAD1  | 8.87786 | 0.607549 |
| PTPLAD2  | 5.30442 | 0.725008 |
| PTPLB    | 7.19199 | 0.726319 |
| PTPMT1   | 6.92434 | 0.414339 |
| PTPN18   | 5.57921 | 0.450427 |
| PTPN6    | 8.53512 | 0.636643 |
| PTPN7    | 6.10902 | 0.481795 |
| PTPRCAP  | 7.40434 | 1.29059  |
| PTPRG    | 5.28462 | 1.10494  |
| PTPRK    | 5.46615 | 1.12978  |
| PTPRM    | 5.14716 | 0.710329 |
| PTPRN2   | 5.41026 | 0.838165 |
| PTRH2    | 7.97466 | 0.628272 |
| PTRHD1   | 8.08048 | 0.696642 |
| PTS      | 7.91546 | 0.603972 |
| PTTG1    | 8.42525 | 1.10685  |
| PTTG1IP  | 9.41864 | 0.494273 |
| PUF60    | 7.93858 | 0.474197 |
| PURB     | 6.31206 | 0.400397 |
| PUS1     | 6.90305 | 0.510779 |
| PUS3     | 7.59509 | 0.6582   |
| PUS7     | 6.77343 | 0.970512 |
| PUS7L    | 5.79167 | 0.622489 |
| PUSL1    | 6.20194 | 0.458902 |
| PVRIG    | 4.84269 | 0.598308 |
| PWAR6    | 5.83985 | 0.986542 |
| PWP1     | 7.99662 | 0.450781 |
| PXDN     | 5.02893 | 1.18327  |
| PXK      | 5.39227 | 0.440788 |
| PXMP2    | 6.08653 | 0.547355 |
| PXN-AS1  | 5.58356 | 0.447983 |
| PXYLP1   | 5.18535 | 0.440568 |
| PYCARD   | 7.03515 | 0.77844  |
| PYCARDOS | 5.23104 | 0.440989 |

|           |         |          |
|-----------|---------|----------|
| PYCR1     | 7.93853 | 0.481337 |
| PYCR2     | 7.57459 | 0.647642 |
| PYCRL     | 5.3809  | 0.40796  |
| PYROXD1   | 6.46442 | 0.532842 |
| PYROXD2   | 5.53416 | 0.454416 |
| PYURF     | 8.96235 | 0.483837 |
| PYY2      | 6.13682 | 0.452897 |
| QARS      | 10.0963 | 0.584079 |
| QKI       | 5.83966 | 0.511262 |
| QPCT      | 9.94204 | 2.02414  |
| QPCTL     | 5.86101 | 0.402317 |
| QPRT      | 7.19054 | 0.757213 |
| QRSL1     | 5.06507 | 0.473792 |
| QSER1     | 6.26889 | 0.446565 |
| QSOX2     | 6.70185 | 0.43929  |
| QTRT1     | 7.70259 | 0.530046 |
| R3HCC1    | 7.47336 | 0.443659 |
| R3HDM2    | 6.96922 | 0.529033 |
| RAB10     | 9.06891 | 0.485188 |
| RAB11A    | 7.07942 | 0.530669 |
| RAB11FIP1 | 6.6411  | 1.02543  |
| RAB11FIP2 | 7.29795 | 0.823643 |
| RAB11FIP5 | 6.17892 | 0.494358 |
| RAB12     | 5.32779 | 0.408989 |
| RAB13     | 7.7268  | 1.27603  |
| RAB15     | 5.53842 | 0.664166 |
| RAB1B     | 7.47077 | 0.405004 |
| RAB22A    | 6.53352 | 0.447467 |
| RAB24     | 8.52887 | 0.717349 |
| RAB26     | 5.77495 | 0.700522 |
| RAB27A    | 7.72894 | 0.79205  |
| RAB28     | 6.34813 | 0.545234 |
| RAB29     | 6.34433 | 0.916482 |
| RAB2B     | 8.08764 | 0.575614 |
| RAB30     | 7.16795 | 0.900258 |
| RAB30-AS1 | 6.23881 | 0.773492 |
| RAB31     | 6.02083 | 1.34244  |
| RAB33B    | 4.8797  | 0.593743 |
| RAB34     | 6.11464 | 1.29391  |
| RAB36     | 6.55782 | 0.82521  |
| RAB39B    | 5.37195 | 1.14407  |
| RAB3A     | 6.20127 | 0.413008 |
| RAB3B     | 5.0127  | 0.774754 |
| RAB3D     | 6.61798 | 0.407623 |
| RAB3GAP1  | 6.20711 | 0.408791 |
| RAB3GAP2  | 6.32849 | 0.429906 |
| RAB4A     | 6.4089  | 1.10102  |

|           |         |          |
|-----------|---------|----------|
| RAB5B     | 6.58916 | 0.564827 |
| RAB6C     | 9.19956 | 0.513371 |
| RAB8A     | 9.53313 | 0.598274 |
| RAB8B     | 6.48458 | 0.955111 |
| RAB9A     | 8.54678 | 0.562698 |
| RABAC1    | 10.7446 | 0.682467 |
| RABEP1    | 5.81457 | 0.439854 |
| RABEPK    | 5.68225 | 0.408367 |
| RABGAP1L  | 6.47968 | 0.551237 |
| RABGGTA   | 6.54812 | 0.44657  |
| RABGGTB   | 8.3128  | 0.71341  |
| RABIF     | 6.40854 | 0.605485 |
| RABL2A    | 5.57043 | 0.511018 |
| RABL2B    | 5.57043 | 0.511018 |
| RABL3     | 5.46651 | 0.449075 |
| RAC1      | 7.50175 | 0.475635 |
| RAC2      | 9.52232 | 0.736899 |
| RACGAP1   | 5.89146 | 1.29848  |
| RAD1      | 6.19385 | 0.452693 |
| RAD17     | 8.66488 | 0.490934 |
| RAD21     | 8.61026 | 0.666647 |
| RAD23A    | 8.58324 | 0.400164 |
| RAD23B    | 7.70762 | 0.453625 |
| RAD50     | 6.16315 | 0.508382 |
| RAD51-AS1 | 6.59397 | 0.687048 |
| RAD51AP1  | 5.32829 | 1.1521   |
| RAD51C    | 6.56341 | 0.622287 |
| RAD9A     | 6.48232 | 0.412723 |
| RAF1      | 7.38417 | 0.475736 |
| RALA      | 7.44331 | 0.61217  |
| RALB      | 6.36808 | 0.507749 |
| RALBP1    | 7.00264 | 0.47744  |
| RALGDS    | 7.4656  | 0.469399 |
| RALGPS2   | 7.42393 | 0.921952 |
| RALY      | 7.99589 | 0.650362 |
| RALY-AS1  | 6.20437 | 0.647726 |
| RAMP2     | 5.22378 | 0.406023 |
| RAN       | 9.35826 | 0.760213 |
| RANBP2    | 7.61297 | 0.623461 |
| RANBP6    | 7.67803 | 0.791761 |
| RANBP9    | 6.68964 | 0.479472 |
| RAP1B     | 10.8031 | 0.432101 |
| RAP1GAP2  | 5.58735 | 1.03104  |
| RAP1GDS1  | 6.25058 | 0.476227 |
| RAP2A     | 5.32335 | 0.419456 |
| RAP2B     | 5.21472 | 0.4027   |
| RAP2C     | 7.57266 | 0.809181 |

|            |         |          |
|------------|---------|----------|
| RAPGEF1    | 6.54394 | 0.479129 |
| RAPGEF2    | 7.5083  | 0.911995 |
| RAPGEF4    | 4.89988 | 1.27079  |
| RAPGEF6    | 5.81439 | 0.411742 |
| RARRES3    | 7.28018 | 1.22597  |
| RARS       | 8.6894  | 0.481131 |
| RASA1      | 8.40081 | 0.642195 |
| RASA2      | 8.67941 | 0.634324 |
| RASA3      | 5.7132  | 0.409633 |
| RASA4      | 6.0675  | 0.70025  |
| RASA4B     | 6.0675  | 0.70025  |
| RASA4CP    | 6.3396  | 0.623429 |
| RASAL3     | 6.97088 | 0.503549 |
| RASD1      | 7.40011 | 1.17701  |
| RASGRP1    | 6.24206 | 2.35821  |
| RASGRP3    | 6.06235 | 1.03916  |
| RASSF1-AS1 | 5.65231 | 0.413804 |
| RASSF2     | 6.03172 | 0.91937  |
| RASSF3     | 5.07043 | 0.695506 |
| RASSF5     | 8.02234 | 0.713188 |
| RASSF6     | 6.3003  | 1.8951   |
| RAVER1     | 6.48756 | 0.416298 |
| RB1        | 6.68409 | 0.929488 |
| RB1CC1     | 8.18083 | 0.633915 |
| RBBP4      | 7.36775 | 0.519859 |
| RBBP5      | 6.19988 | 0.768273 |
| RBBP7      | 9.18012 | 0.513213 |
| RBBP8      | 7.63069 | 0.830534 |
| RBCK1      | 7.24981 | 0.436704 |
| RBFOX2     | 6.43425 | 0.499564 |
| RBKS       | 6.63513 | 0.511095 |
| RBL2       | 7.65109 | 0.583883 |
| RBM12      | 6.90037 | 0.573396 |
| RBM12B     | 5.21393 | 0.674781 |
| RBM14      | 6.25617 | 0.437676 |
| RBM18      | 6.43287 | 0.520743 |
| RBM22      | 8.15201 | 0.465869 |
| RBM23      | 6.96702 | 0.490842 |
| RBM25      | 7.61695 | 0.665675 |
| RBM27      | 7.6922  | 0.406529 |
| RBM3       | 6.82276 | 0.554762 |
| RBM33      | 5.55939 | 0.476458 |
| RBM34      | 5.97921 | 0.53902  |
| RBM38      | 6.55462 | 0.707923 |
| RBM39      | 8.80493 | 0.503902 |
| RBM41      | 5.9273  | 0.63877  |
| RBM42      | 6.73892 | 0.517446 |



|        |         |          |
|--------|---------|----------|
| RBM47  | 6.53577 | 0.444128 |
| RBM48  | 5.4846  | 0.446909 |
| RBM4B  | 5.77776 | 0.659486 |
| RBM5   | 7.02696 | 0.481708 |
| RBM6   | 6.94392 | 0.480385 |
| RBM7   | 6.2212  | 0.670384 |
| RBM8A  | 6.81475 | 0.48036  |
| RBMS1  | 8.58919 | 0.810549 |
| RBMX2  | 6.38378 | 0.542449 |
| RBMXL1 | 6.40148 | 0.749312 |
| RBP7   | 5.02459 | 0.512625 |
| RBPJ   | 7.07416 | 0.496077 |
| RBX1   | 9.12195 | 0.503785 |
| RC3H1  | 6.06402 | 0.629237 |
| RC3H2  | 6.12498 | 0.422811 |
| RCBTB2 | 5.94573 | 0.734179 |
| RCC2   | 7.98067 | 0.64457  |
| RCN1   | 7.95824 | 0.659116 |
| RCN2   | 9.11606 | 0.501723 |
| RCN3   | 5.74382 | 0.587543 |
| RCOR1  | 5.74523 | 0.421837 |
| RCOR3  | 6.03011 | 0.622865 |
| RCSD1  | 7.54795 | 1.0012   |
| RDH13  | 5.59926 | 0.488807 |
| RDH14  | 8.10177 | 0.605981 |
| RDY    | 6.00752 | 0.499514 |
| REC114 | 5.31796 | 0.583784 |
| RECQL  | 7.34532 | 0.726733 |
| REEP2  | 6.58121 | 0.40125  |
| REEP3  | 5.4894  | 0.694595 |
| REEP5  | 9.77922 | 0.604571 |
| RELA   | 7.28087 | 0.43602  |
| RELB   | 6.24809 | 0.62619  |
| RELL1  | 5.28089 | 0.623134 |
| RELL2  | 6.53333 | 0.468151 |
| RELN   | 6.19405 | 1.75584  |
| REM2   | 5.66677 | 0.48468  |
| REPS1  | 5.78953 | 0.411797 |
| RETN   | 5.34714 | 0.713626 |
| RETSAT | 6.20902 | 0.447141 |
| REV3L  | 6.31055 | 0.742708 |
| REXO2  | 6.48281 | 0.511519 |
| RFC1   | 7.58327 | 0.49156  |
| RFC2   | 5.57769 | 0.545223 |
| RFC4   | 7.458   | 0.888626 |
| RFC5   | 5.0704  | 0.720287 |
| RFESD  | 5.01008 | 0.566513 |

|         |         |          |
|---------|---------|----------|
| RFK     | 7.09729 | 0.66785  |
| RFNG    | 5.87504 | 0.414233 |
| RFWD2   | 6.74326 | 0.552042 |
| RFX5    | 7.92146 | 0.522906 |
| RFX7    | 5.86232 | 0.779251 |
| RFXANK  | 8.13516 | 0.469613 |
| RGCC    | 6.07764 | 1.14103  |
| RGL1    | 6.1871  | 1.05259  |
| RGL2    | 7.23887 | 0.496178 |
| RGPD1   | 6.72709 | 0.894293 |
| RGPD2   | 6.72709 | 0.894293 |
| RGPD3   | 6.89664 | 0.775231 |
| RGPD4   | 6.89664 | 0.775231 |
| RGPD5   | 6.89664 | 0.775231 |
| RGPD6   | 6.89664 | 0.775231 |
| RGPD8   | 6.89664 | 0.775231 |
| RGS1    | 7.37269 | 1.32478  |
| RGS16   | 5.37297 | 0.653591 |
| RGS18   | 5.3028  | 1.52322  |
| RGS19   | 7.99539 | 0.499939 |
| RGS2    | 10.5596 | 1.51616  |
| RHBDD2  | 7.40511 | 0.551944 |
| RHBDF2  | 6.93718 | 0.47942  |
| RHEBL1  | 5.39744 | 0.47925  |
| RHNO1   | 5.91695 | 0.656864 |
| RHOB    | 6.22661 | 0.572709 |
| RHOBTB2 | 5.48644 | 0.401741 |
| RHOBTB3 | 5.2239  | 0.685718 |
| RHOC    | 5.02751 | 0.403458 |
| RHOG    | 6.97761 | 0.506424 |
| RHOH    | 8.58314 | 1.21033  |
| RHOQ    | 8.84674 | 0.758402 |
| RHOV    | 5.47773 | 0.439139 |
| RHPN1   | 6.5469  | 0.463914 |
| RHPN2   | 4.83197 | 0.740963 |
| RIC3    | 5.59842 | 0.575029 |
| RICTOR  | 6.96568 | 0.742169 |
| RILP    | 6.76655 | 0.413201 |
| RILPL2  | 7.02729 | 0.736864 |
| RIN1    | 6.46233 | 0.414518 |
| RINT1   | 7.13129 | 0.552821 |
| RIOK1   | 6.7844  | 0.67908  |
| RIOK2   | 6.13664 | 0.72396  |
| RIPK2   | 6.42857 | 0.439166 |
| RIT1    | 5.36295 | 0.562863 |
| RLF     | 6.08549 | 0.588164 |
| RMDN1   | 5.71349 | 0.451601 |

|                 |         |          |
|-----------------|---------|----------|
| RMDN3           | 7.99905 | 0.481111 |
| RMI1            | 5.9992  | 0.982783 |
| RMI2            | 5.28398 | 0.704555 |
| RMND1           | 5.57543 | 0.629585 |
| RMND5A          | 6.28193 | 0.418388 |
| RNA45S5         | 6.62231 | 0.774795 |
| RNASE2          | 6.29129 | 1.51405  |
| RNASE3          | 6.28513 | 1.30752  |
| RNASE4          | 5.88971 | 1.33098  |
| RNASE6          | 6.04701 | 2.20692  |
| RNASEH1         | 7.08023 | 0.449006 |
| RNASEH1-AS1     | 4.83824 | 0.47576  |
| RNASEH2A        | 7.17832 | 0.795654 |
| RNASEK          | 10.507  | 0.561856 |
| RNASEK-C17orf49 | 9.16864 | 0.564148 |
| RNASEL          | 5.12555 | 0.501023 |
| RND1            | 6.35483 | 0.555286 |
| RND3            | 6.38096 | 2.57587  |
| RNF10           | 7.05459 | 0.467095 |
| RNF103          | 7.82589 | 0.414332 |
| RNF103-CHMP3    | 7.75013 | 0.519004 |
| RNF11           | 8.59942 | 0.964008 |
| RNF111          | 6.97436 | 0.753269 |
| RNF113A         | 8.57865 | 0.588754 |
| RNF114          | 7.95818 | 0.436007 |
| RNF115          | 6.61078 | 0.405266 |
| RNF123          | 6.54086 | 0.411622 |
| RNF126          | 6.70153 | 0.40145  |
| RNF13           | 9.56986 | 0.447725 |
| RNF135          | 7.70554 | 0.730706 |
| RNF138          | 6.28232 | 0.579683 |
| RNF139          | 8.57374 | 0.551609 |
| RNF139-AS1      | 5.23656 | 0.707528 |
| RNF14           | 5.75792 | 0.530802 |
| RNF145          | 6.04995 | 0.468274 |
| RNF146          | 6.52868 | 0.713506 |
| RNF148          | 4.90626 | 0.752831 |
| RNF149          | 8.19807 | 0.818316 |
| RNF157          | 5.11286 | 0.531795 |
| RNF168          | 5.6877  | 0.538263 |
| RNF169          | 6.55163 | 0.536074 |
| RNF181          | 9.53539 | 0.453355 |
| RNF185          | 7.20594 | 0.441111 |
| RNF19A          | 7.58966 | 0.602967 |
| RNF19B          | 4.80467 | 0.473705 |
| RNF20           | 8.34657 | 0.652959 |
| RNF213          | 6.15196 | 0.53858  |

|                 |         |          |
|-----------------|---------|----------|
| RNF38           | 7.09478 | 0.543987 |
| RNF4            | 8.60257 | 0.430121 |
| RNF44           | 6.95933 | 0.499527 |
| RNF5P1          | 7.70542 | 0.621661 |
| RNFT1           | 5.61442 | 0.604206 |
| RNGTT           | 7.10757 | 0.939425 |
| RNMT            | 5.80611 | 0.426592 |
| RNMTL1          | 6.69786 | 0.492127 |
| RNPC3           | 6.86525 | 0.620616 |
| RNPEP           | 7.66763 | 0.627097 |
| ROBO1           | 4.88099 | 1.62938  |
| ROBO3           | 5.04692 | 0.550448 |
| ROCK2           | 6.08463 | 0.480221 |
| ROGDI           | 5.09979 | 0.462866 |
| ROMO1           | 8.72919 | 0.497149 |
| RP1-130G2.1     | 5.71914 | 0.531501 |
| RP1-151F17.2    | 6.89871 | 0.926682 |
| RP1-170O19.17   | 4.99053 | 0.439527 |
| RP1-30M3.5      | 5.44265 | 0.589935 |
| RP1-39G22.7     | 6.35723 | 0.713906 |
| RP1-80B9.2      | 5.01371 | 0.441022 |
| RP11-108M9.4    | 7.59733 | 0.740596 |
| RP11-1094M14.11 | 5.56085 | 0.570538 |
| RP11-111M22.3   | 7.07742 | 0.814707 |
| RP11-111M22.4   | 5.12923 | 0.592667 |
| RP11-1191J2.5   | 5.00664 | 0.430322 |
| RP11-119F7.5    | 5.09805 | 0.838468 |
| RP11-11N9.4     | 5.13685 | 1.1988   |
| RP11-121C2.2    | 5.74977 | 0.647751 |
| RP11-124L9.5    | 5.32477 | 1.19873  |
| RP11-1277A3.3   | 5.03685 | 0.421078 |
| RP11-134L10.1   | 5.13932 | 0.492247 |
| RP11-138A9.1    | 8.66341 | 1.22327  |
| RP11-174G6.5    | 5.68216 | 0.668818 |
| RP11-182L21.5   | 5.77017 | 0.564931 |
| RP11-190A12.8   | 5.29478 | 0.538262 |
| RP11-196G18.24  | 6.22233 | 1.03798  |
| RP11-199F11.2   | 6.23538 | 0.821322 |
| RP11-209A2.1    | 10.8107 | 0.505698 |
| RP11-212P7.2    | 5.18045 | 0.49051  |
| RP11-226L15.5   | 5.33174 | 0.888287 |
| RP11-258C19.7   | 5.17812 | 0.468375 |
| RP11-271C24.3   | 7.53537 | 0.954767 |
| RP11-284F21.10  | 5.52274 | 0.60478  |
| RP11-285F7.2    | 6.48068 | 0.526687 |
| RP11-28F1.2     | 7.43142 | 1.09822  |
| RP11-295G20.2   | 4.98387 | 0.48289  |

|                |         |          |
|----------------|---------|----------|
| RP11-301O19.1  | 4.83073 | 0.415149 |
| RP11-305K5.1   | 7.31546 | 0.701756 |
| RP11-326I11.3  | 5.03486 | 0.578618 |
| RP11-326I11.5  | 5.22181 | 0.693444 |
| RP11-332H14.2  | 6.10602 | 0.526361 |
| RP11-339B21.15 | 5.50398 | 0.471941 |
| RP11-348P10.2  | 5.04598 | 0.573832 |
| RP11-355B11.2  | 5.27671 | 0.677448 |
| RP11-390E23.6  | 5.46963 | 0.443827 |
| RP11-391M1.4   | 6.08434 | 0.874106 |
| RP11-395B7.2   | 5.87523 | 0.463163 |
| RP11-395B7.7   | 6.33995 | 0.548152 |
| RP11-403P17.3  | 6.87893 | 0.474142 |
| RP11-403P17.4  | 8.96146 | 0.531017 |
| RP11-410L14.2  | 6.5173  | 0.57923  |
| RP11-426C22.5  | 5.39714 | 0.401145 |
| RP11-429B14.4  | 4.87458 | 0.409784 |
| RP11-432J9.6   | 5.05849 | 0.434405 |
| RP11-436D10.3  | 5.12874 | 0.431193 |
| RP11-464F9.20  | 5.59187 | 0.499915 |
| RP11-469M7.1   | 5.94118 | 0.677768 |
| RP11-473I1.9   | 6.28366 | 0.494445 |
| RP11-480A16.1  | 6.43219 | 0.484939 |
| RP11-488L18.10 | 7.20834 | 0.828995 |
| RP11-489E7.4   | 6.67207 | 0.794666 |
| RP11-500C11.3  | 5.09966 | 0.451213 |
| RP11-50B3.4    | 6.6128  | 0.635848 |
| RP11-521D12.1  | 4.93851 | 0.410811 |
| RP11-522D2.1   | 4.90834 | 0.919506 |
| RP11-532F12.5  | 6.10293 | 0.86047  |
| RP11-533E19.7  | 5.32908 | 0.627555 |
| RP11-539L10.3  | 4.99306 | 0.514594 |
| RP11-53O19.3   | 5.00682 | 0.51835  |
| RP11-554J4.1   | 6.2636  | 0.847518 |
| RP11-568N6.1   | 7.20585 | 1.18871  |
| RP11-589P10.5  | 5.12809 | 0.435952 |
| RP11-613M5.1   | 5.53205 | 0.635011 |
| RP11-617F23.1  | 6.15721 | 0.66621  |
| RP11-680F8.4   | 4.90634 | 0.865572 |
| RP11-686D22.8  | 4.83437 | 0.48851  |
| RP11-727A23.11 | 4.85552 | 0.539759 |
| RP11-769O8.3   | 6.14913 | 0.885336 |
| RP11-792A8.4   | 4.93237 | 0.49695  |
| RP11-796E2.4   | 6.52276 | 0.55517  |
| RP11-843B15.2  | 5.86985 | 0.402252 |
| RP11-846E15.2  | 7.48293 | 0.845999 |
| RP11-97C16.1   | 6.28912 | 0.995058 |

|               |         |          |
|---------------|---------|----------|
| RP13-20L14.1  | 4.94473 | 0.489194 |
| RP13-258O15.1 | 12.1453 | 0.433302 |
| RP13-270P17.3 | 5.17534 | 0.558886 |
| RP3-334F4.1   | 6.5307  | 0.438954 |
| RP3-486D24.1  | 11.3524 | 0.57389  |
| RP3-507I15.1  | 10.9001 | 0.528275 |
| RP3-508I15.21 | 6.57349 | 0.49985  |
| RP3-525N10.2  | 6.04209 | 1.55422  |
| RP4-545K15.5  | 5.27773 | 0.538239 |
| RP4-555D20.2  | 5.84182 | 1.45981  |
| RP4-595K12.1  | 11.5148 | 0.593624 |
| RP4-635E18.8  | 7.07235 | 0.581243 |
| RP4-710M16.1  | 7.4249  | 0.497586 |
| RP4-758J24.5  | 5.65225 | 0.600784 |
| RP4-773N10.4  | 5.13883 | 0.45781  |
| RP4-781L3.1   | 8.21091 | 0.789391 |
| RP4-798A10.7  | 5.24746 | 0.552486 |
| RP5-1092A3.4  | 5.88387 | 1.12156  |
| RP5-1136G13.2 | 5.39328 | 0.746774 |
| RP5-1157M23.2 | 5.99317 | 0.48171  |
| RP5-882O7.1   | 13.2265 | 0.40142  |
| RP5-894A10.6  | 5.04963 | 0.408926 |
| RP5-930J4.4   | 6.18666 | 0.489011 |
| RP5-935K16.1  | 5.7698  | 0.619958 |
| RPA1          | 6.43676 | 0.477993 |
| RPA2          | 7.43626 | 0.673445 |
| RPA3          | 8.64029 | 0.725495 |
| RPA3OS        | 6.56169 | 0.768681 |
| RPAP1         | 6.30618 | 0.423144 |
| RPAP2         | 6.32267 | 0.446779 |
| RPAP3         | 6.22813 | 0.66933  |
| RPE           | 5.44165 | 0.462391 |
| RPEL1         | 5.51244 | 0.508452 |
| RPF2          | 8.1691  | 0.712563 |
| RPH3A         | 5.81194 | 1.17669  |
| RPIA          | 7.42702 | 0.722316 |
| RPL10L        | 5.82778 | 0.562662 |
| RPL14         | 10.7238 | 0.447424 |
| RPL15         | 9.90508 | 0.41735  |
| RPL18A        | 9.37195 | 0.463133 |
| RPL18AP16     | 8.39517 | 0.663909 |
| RPL18P10      | 5.96665 | 0.448781 |
| RPL22         | 11.6127 | 0.447855 |
| RPL22L1       | 9.52471 | 0.949579 |
| RPL23         | 9.06808 | 0.480086 |
| RPL26L1       | 9.09651 | 0.534844 |
| RPL26P37      | 12.1453 | 0.433302 |

|                |         |          |
|----------------|---------|----------|
| RPL27AP        | 6.8042  | 0.557556 |
| RPL28          | 10.0048 | 0.44455  |
| RPL29          | 13.2057 | 0.474322 |
| RPL29P7        | 6.21806 | 0.773712 |
| RPL31          | 8.07246 | 0.601471 |
| RPL35P8        | 6.12106 | 0.559904 |
| RPL36          | 11.8932 | 0.717759 |
| RPL36A         | 10.0027 | 0.465963 |
| RPL36A-HNRNPH2 | 10.7468 | 0.533665 |
| RPL36AL        | 11.7725 | 0.623673 |
| RPL37          | 8.08864 | 0.623811 |
| RPL38          | 10.3423 | 0.437705 |
| RPL39L         | 6.67839 | 0.776368 |
| RPL4           | 13.1731 | 0.415466 |
| RPL7AL2        | 6.92313 | 0.560563 |
| RPL7AP10       | 7.95575 | 0.723232 |
| RPL7AP71       | 5.50804 | 0.426761 |
| RPL7L1         | 8.75252 | 0.520422 |
| RPN1           | 10.9661 | 0.536865 |
| RPN2           | 12.2109 | 0.554779 |
| RPP21          | 7.68922 | 0.423906 |
| RPP25          | 6.59002 | 0.618981 |
| RPP25L         | 8.30813 | 0.490258 |
| RPP38          | 6.9187  | 0.502679 |
| RPP40          | 6.90086 | 0.912408 |
| RPPH1          | 7.6657  | 0.889235 |
| RPRD1A         | 6.76049 | 0.567734 |
| RPRD2          | 6.34773 | 0.417152 |
| RPRM           | 4.87606 | 0.758614 |
| RPS10-NUDT3    | 7.06858 | 0.525702 |
| RPS10L         | 9.52566 | 0.497391 |
| RPS10P2        | 6.45824 | 0.704717 |
| RPS16P5        | 6.94241 | 1.04109  |
| RPS17P5        | 8.91126 | 0.669895 |
| RPS19BP1       | 8.25095 | 0.432553 |
| RPS2           | 12.0635 | 0.644486 |
| RPS21          | 10.44   | 0.47309  |
| RPS23          | 10.698  | 0.619529 |
| RPS24          | 8.86598 | 0.450728 |
| RPS26          | 11.8815 | 0.696551 |
| RPS26P11       | 11.8815 | 0.696551 |
| RPS27          | 10.6163 | 0.619756 |
| RPS27L         | 8.77963 | 0.491236 |
| RPS3           | 13.0105 | 0.411269 |
| RPS4XP2        | 12.29   | 0.495006 |
| RPS4XP3        | 5.54011 | 0.61397  |
| RPS4Y1         | 8.72175 | 2.7538   |

|         |         |          |
|---------|---------|----------|
| RPS6KA1 | 5.43646 | 0.515372 |
| RPS6KA2 | 5.41717 | 0.542808 |
| RPS6KA3 | 6.40351 | 0.604936 |
| RPS6KA5 | 4.8984  | 0.495945 |
| RPS6KB1 | 7.03891 | 0.450826 |
| RPS6KC1 | 6.33289 | 0.869805 |
| RPS6KL1 | 5.53653 | 0.401623 |
| RPSA    | 13.2859 | 0.42065  |
| RPSAP19 | 13.2859 | 0.42065  |
| RPSAP58 | 13.2859 | 0.42065  |
| RPSAP9  | 13.2859 | 0.42065  |
| RPUSD2  | 5.45216 | 0.465369 |
| RPUSD4  | 7.46392 | 0.683246 |
| RRAGA   | 8.32741 | 0.597989 |
| RRAGD   | 8.85466 | 1.00344  |
| RRAS    | 5.01807 | 0.613936 |
| RRAS2   | 4.946   | 1.79621  |
| RRBP1   | 6.97918 | 0.658667 |
| RRM1    | 7.32219 | 0.760667 |
| RRM2    | 7.75502 | 1.8736   |
| RRM2B   | 5.95327 | 0.777113 |
| RRN3    | 6.3614  | 0.484408 |
| RRN3P2  | 5.53219 | 0.44959  |
| RRNAD1  | 6.41342 | 0.449232 |
| RRP15   | 5.91528 | 0.757    |
| RRP1B   | 7.38808 | 0.445233 |
| RRP9    | 6.056   | 0.462348 |
| RRS1    | 8.13916 | 0.644362 |
| RSAD1   | 7.28783 | 0.468823 |
| RSAD2   | 5.92961 | 1.76458  |
| RSBN1   | 6.42757 | 0.666982 |
| RSBN1L  | 6.26643 | 0.472339 |
| RSF1    | 6.25472 | 0.623529 |
| RSL1D1  | 7.25923 | 0.670981 |
| RSL24D1 | 10.2776 | 0.707798 |
| RSPH1   | 5.02324 | 0.63522  |
| RSPRY1  | 6.76024 | 0.566366 |
| RSRC1   | 5.34423 | 0.548855 |
| RSRC2   | 8.78857 | 0.411154 |
| RSRP1   | 8.87125 | 0.666845 |
| RTBDN   | 5.00953 | 0.41085  |
| RTCA    | 6.42333 | 0.458519 |
| RTCB    | 8.02747 | 0.617562 |
| RTN2    | 5.3399  | 0.585144 |
| RTN3    | 8.96188 | 0.642617 |
| RTN4    | 9.24495 | 0.663147 |
| RTN4IP1 | 5.24198 | 0.54123  |



|            |         |          |
|------------|---------|----------|
| RTP4       | 6.0374  | 1.11654  |
| RTP5       | 5.12589 | 0.417078 |
| RUFY3      | 6.35346 | 0.923585 |
| RUNX1-IT1  | 6.11084 | 1.16081  |
| RUNX3      | 6.49529 | 0.540432 |
| RUSC1      | 6.62527 | 0.608972 |
| RUSC1-AS1  | 5.31833 | 0.52158  |
| RUVBL1     | 7.51963 | 0.812367 |
| RWDD1      | 6.91186 | 0.404201 |
| RWDD2A     | 6.00402 | 0.514477 |
| RWDD2B     | 6.97637 | 0.527528 |
| RWDD3      | 6.81564 | 0.615868 |
| RWDD4      | 6.95536 | 0.581565 |
| RXRA       | 6.05362 | 0.444703 |
| RYBP       | 7.56104 | 0.517433 |
| RYK        | 6.76545 | 0.56655  |
| S100A10    | 6.73855 | 1.12457  |
| S100A11    | 7.48406 | 1.15035  |
| S100A11P1  | 6.43016 | 0.752001 |
| S100A12    | 6.83922 | 2.04425  |
| S100A4     | 8.38558 | 1.85232  |
| S100A6     | 6.06753 | 0.806321 |
| S100A8     | 7.39348 | 1.62626  |
| S100A9     | 8.30298 | 1.58593  |
| S100P      | 5.16437 | 1.14835  |
| S100PBP    | 7.179   | 0.728184 |
| S100Z      | 4.80002 | 1.05455  |
| S1PR4      | 7.25558 | 0.596464 |
| SAAL1      | 7.11656 | 0.626527 |
| SAC3D1     | 6.333   | 0.795895 |
| SACM1L     | 8.49351 | 0.775402 |
| SAE1       | 6.44342 | 0.411546 |
| SALL2      | 5.03346 | 0.51066  |
| SALL4      | 5.17665 | 0.463335 |
| SAMD11     | 6.43296 | 0.493615 |
| SAMD12     | 5.49101 | 0.521565 |
| SAMD8      | 5.09951 | 0.443223 |
| SAMD9      | 6.02106 | 1.04263  |
| SAMD9L     | 7.31086 | 1.10344  |
| SAMHD1     | 6.23515 | 0.608961 |
| SAMSN1     | 5.85783 | 1.33285  |
| SAP130     | 6.31888 | 0.540209 |
| SAP18      | 7.4847  | 0.486509 |
| SAPCD1     | 5.25198 | 0.484336 |
| SAPCD1-AS1 | 5.13735 | 0.437848 |
| SAPCD2     | 6.69987 | 0.477532 |
| SAR1A      | 7.60697 | 0.492576 |

|            |         |          |
|------------|---------|----------|
| SAR1B      | 7.76017 | 0.48     |
| SARAF      | 10.8831 | 0.666703 |
| SARS       | 7.31387 | 0.733246 |
| SARS2      | 5.28281 | 0.428522 |
| SART3      | 6.17486 | 0.40831  |
| SASH3      | 7.36577 | 1.12714  |
| SAT1       | 8.44587 | 0.703997 |
| SAT2       | 8.152   | 0.509646 |
| SATB1      | 5.3196  | 1.21868  |
| SAV1       | 5.62944 | 0.444013 |
| SBDS       | 8.95995 | 0.617902 |
| SBDSP1     | 8.95995 | 0.617902 |
| SBF2       | 5.26684 | 0.534838 |
| SC5D       | 5.45125 | 0.516289 |
| SCAF11     | 7.14968 | 0.405276 |
| SCAF4      | 5.75165 | 0.567802 |
| SCAF8      | 7.57615 | 0.828632 |
| SCAMP1     | 6.72431 | 0.515194 |
| SCAMP1-AS1 | 6.2426  | 0.647299 |
| SCAMP3     | 8.61057 | 0.567998 |
| SCAMP5     | 6.57912 | 0.414996 |
| SCAND1     | 8.10462 | 0.490336 |
| SCAP       | 7.1805  | 0.441911 |
| SCAPER     | 6.8549  | 0.758338 |
| SCARB2     | 7.70729 | 0.711259 |
| SCARNA15   | 6.94691 | 0.600085 |
| SCARNA16   | 5.28603 | 0.687087 |
| SCARNA17   | 5.74237 | 0.622821 |
| SCCPDH     | 5.50617 | 0.916474 |
| SCD        | 5.39506 | 0.590466 |
| SCD5       | 4.8567  | 0.456287 |
| SCFD1      | 7.06877 | 0.524816 |
| SCFD2      | 6.88288 | 0.464564 |
| SCGB3A1    | 5.6097  | 0.420981 |
| SCN3A      | 5.18117 | 2.03028  |
| SCNM1      | 8.15987 | 0.50158  |
| SCNN1B     | 5.97627 | 0.993951 |
| SCO1       | 6.54007 | 0.587909 |
| SCO2       | 7.595   | 0.685305 |
| SCOC       | 7.54464 | 0.635022 |
| SCP2       | 8.7621  | 0.712613 |
| SCPEP1     | 6.10282 | 0.5605   |
| SCRIB      | 7.01929 | 0.447564 |
| SCRN1      | 7.71694 | 0.791441 |
| SCT        | 5.26876 | 0.671426 |
| SCYL2      | 8.32596 | 1.28021  |
| SCYL3      | 5.48363 | 0.53807  |

|           |         |          |
|-----------|---------|----------|
| SDAD1     | 6.2675  | 0.438918 |
| SDC1      | 11.0832 | 0.693309 |
| SDCBP     | 8.13729 | 1.23313  |
| SDE2      | 7.25807 | 0.764122 |
| SDF2      | 7.48715 | 0.471681 |
| SDF2L1    | 9.64147 | 0.660178 |
| SDF4      | 8.90704 | 0.509799 |
| SDHA      | 8.16521 | 0.585534 |
| SDHAF2    | 7.03723 | 0.541862 |
| SDHAP1    | 7.61524 | 0.464088 |
| SDHAP2    | 7.61524 | 0.464088 |
| SDHC      | 6.58121 | 0.479924 |
| SDR39U1   | 8.32585 | 0.488088 |
| SDSL      | 5.00316 | 0.489534 |
| SEC11A    | 10.4139 | 0.544664 |
| SEC11C    | 9.15214 | 0.680221 |
| SEC13     | 10.0952 | 0.42071  |
| SEC14L1   | 8.25311 | 0.431814 |
| SEC14L1P1 | 5.31836 | 0.522338 |
| SEC16A    | 8.20432 | 0.493905 |
| SEC22B    | 8.56556 | 0.56328  |
| SEC23A    | 6.99553 | 0.549359 |
| SEC23B    | 8.6185  | 0.558717 |
| SEC23IP   | 5.48592 | 0.428671 |
| SEC24A    | 7.63654 | 0.676521 |
| SEC24B    | 8.23117 | 0.552992 |
| SEC24C    | 7.70812 | 0.418913 |
| SEC24D    | 6.31502 | 0.740174 |
| SEC31A    | 9.64034 | 0.56723  |
| SEC31B    | 6.31417 | 0.53169  |
| SEC61A1   | 10.1457 | 0.436079 |
| SEC61B    | 9.74458 | 0.61113  |
| SEC61G    | 10.6761 | 0.52461  |
| SEC62     | 9.34544 | 0.711742 |
| SEC63     | 7.1143  | 0.581588 |
| SECISBP2  | 8.74316 | 0.412721 |
| SECISBP2L | 7.64349 | 0.905773 |
| SECTM1    | 5.0892  | 0.802642 |
| SEH1L     | 6.75223 | 0.787192 |
| SEL1L     | 9.24232 | 0.770521 |
| SEL1L3    | 7.75935 | 0.885987 |
| SELENBP1  | 5.10488 | 0.570713 |
| SELK      | 11.2788 | 0.451788 |
| SELL      | 5.97011 | 1.88713  |
| SELM      | 9.45493 | 1.05526  |
| SELPLG    | 7.51104 | 0.828316 |
| SELT      | 9.92085 | 0.53144  |

|                |         |          |
|----------------|---------|----------|
| SEMA4A         | 7.71495 | 0.839634 |
| SEMA4B         | 6.96826 | 0.591037 |
| SEMA4D         | 6.20238 | 0.736229 |
| SENCR          | 6.35231 | 0.565592 |
| SENP3-EIF4A1   | 9.71863 | 0.462955 |
| SENP6          | 5.97506 | 0.582925 |
| SENP7          | 4.93503 | 0.466047 |
| 15-Sep         | 10.2823 | 0.634534 |
| SEPHS1         | 6.59954 | 0.548519 |
| SEPHS2         | 7.48218 | 0.736632 |
| SEPN1          | 5.95731 | 0.437061 |
| SEPP1          | 6.03635 | 0.997552 |
| 1-Sep          | 5.74042 | 0.832615 |
| 10-Sep         | 7.35874 | 1.84011  |
| 3-Sep          | 5.02284 | 0.474777 |
| 5-Sep          | 5.01982 | 0.44952  |
| SEPT5-GP1BB    | 5.48274 | 0.40636  |
| 6-Sep          | 6.79132 | 0.963592 |
| 8-Sep          | 5.35914 | 0.587316 |
| 9-Sep          | 6.41819 | 0.423206 |
| SEPW1          | 8.43366 | 0.498238 |
| SERBP1         | 8.63461 | 0.58121  |
| SERF1A         | 6.63545 | 0.511953 |
| SERF1B         | 6.63545 | 0.511953 |
| SERF2-C15ORF63 | 8.8786  | 0.521978 |
| SERINC1        | 9.97905 | 0.64267  |
| SERINC3        | 8.81345 | 0.417717 |
| SERP1          | 9.97078 | 0.413115 |
| SERPINB1       | 6.5954  | 0.68761  |
| SERPINB9       | 5.11018 | 1.06556  |
| SERPINB9P1     | 4.92629 | 0.559481 |
| SERPINH1       | 5.50781 | 0.493314 |
| SERPINI1       | 7.78974 | 1.49047  |
| SERTAD1        | 6.57788 | 0.556599 |
| SERTAD2        | 8.07356 | 0.750629 |
| SERTAD3        | 6.43761 | 0.513962 |
| SESN1          | 7.36384 | 0.902237 |
| SESN2          | 6.86792 | 0.928363 |
| SET            | 10.5174 | 0.442537 |
| SETBP1         | 7.54265 | 0.952559 |
| SETD2          | 5.90394 | 0.509254 |
| SETD6          | 6.71779 | 0.575265 |
| SETD7          | 6.14384 | 0.519012 |
| SETD9          | 5.5345  | 0.507421 |
| SETP4          | 9.67876 | 0.898185 |
| SETSIP         | 10.4298 | 0.442628 |
| SETX           | 7.08574 | 0.601768 |

|            |         |          |
|------------|---------|----------|
| SF1        | 6.34458 | 0.528793 |
| SF3A2      | 6.05097 | 0.575437 |
| SF3A3      | 6.36178 | 0.57511  |
| SF3B1      | 9.10052 | 0.405284 |
| SF3B4      | 7.60015 | 0.743885 |
| SF3B5      | 10.0347 | 0.606935 |
| SFMBT2     | 6.37169 | 0.490442 |
| SFN        | 5.83189 | 0.531212 |
| SFR1       | 5.38502 | 0.709385 |
| SFT2D2     | 6.64389 | 0.537793 |
| SFXN1      | 5.63013 | 0.533337 |
| SFXN3      | 5.58767 | 0.445166 |
| SFXN4      | 7.15835 | 0.411118 |
| SGK1       | 8.55374 | 1.37654  |
| SGK3       | 6.11444 | 0.671584 |
| SGK494     | 4.83347 | 0.568404 |
| SGMS1      | 4.97752 | 0.712504 |
| SGSH       | 6.02566 | 0.479381 |
| SH2B2      | 8.10143 | 0.791864 |
| SH2B3      | 5.26015 | 0.753531 |
| SH2D2A     | 5.18868 | 0.487753 |
| SH3BGR     | 5.18136 | 0.567564 |
| SH3BGRL    | 9.42108 | 0.595836 |
| SH3BGRL2   | 6.21706 | 1.19096  |
| SH3BGRL3   | 8.20906 | 0.545579 |
| SH3BP5     | 7.76476 | 1.24151  |
| SH3BP5-AS1 | 6.24504 | 0.470367 |
| SH3D21     | 5.70019 | 0.527273 |
| SH3GLB1    | 8.60997 | 0.560853 |
| SH3KBP1    | 9.25901 | 0.497454 |
| SH3TC1     | 4.95795 | 0.464022 |
| SH3YL1     | 6.39784 | 0.416498 |
| SHC1       | 8.27349 | 0.701108 |
| SHCBP1     | 5.82612 | 1.38542  |
| SHFM1      | 9.61842 | 0.466117 |
| SHISA2     | 4.89174 | 1.97443  |
| SHISA5     | 8.57113 | 0.445941 |
| SHMT2      | 7.91989 | 0.897811 |
| SHOC2      | 7.67873 | 0.661907 |
| SHPRH      | 5.34928 | 0.955167 |
| SHQ1       | 6.76249 | 0.587332 |
| SIAH1      | 5.37716 | 0.477551 |
| SIAH2      | 7.44775 | 0.480406 |
| SIDT1      | 7.36366 | 1.02108  |
| SIDT2      | 7.24839 | 0.423786 |
| SIGIRR     | 6.54685 | 0.780985 |
| SIGMAR1    | 7.83195 | 0.651414 |

|          |         |          |
|----------|---------|----------|
| SIK1     | 8.70743 | 0.710512 |
| SIK3     | 6.01152 | 0.424854 |
| SIKE1    | 5.02274 | 0.539153 |
| SIL1     | 9.07463 | 0.552203 |
| SIMC1    | 5.42707 | 1.00556  |
| SIPA1    | 5.69434 | 0.440931 |
| SIRPA    | 4.81522 | 0.417542 |
| SIRT1    | 6.75657 | 0.715633 |
| SIT1     | 6.48665 | 0.795945 |
| SIVA1    | 6.85859 | 0.402241 |
| SKA2     | 6.36004 | 0.964656 |
| SKAP1    | 6.03199 | 0.906718 |
| SKAP2    | 5.71391 | 0.526594 |
| SKIL     | 5.63416 | 0.429284 |
| SKIV2L2  | 6.62139 | 0.413966 |
| SKP1     | 9.41295 | 0.450292 |
| SKP2     | 5.38882 | 0.619925 |
| SLA      | 5.66601 | 0.899276 |
| SLAIN1   | 5.88335 | 0.873821 |
| SLAIN2   | 5.60486 | 0.443329 |
| SLAMF1   | 7.02543 | 1.68321  |
| SLAMF6   | 6.41907 | 0.772507 |
| SLAMF7   | 10.9643 | 0.686401 |
| SLBP     | 8.00675 | 0.752123 |
| SLC10A3  | 7.25611 | 0.625883 |
| SLC12A2  | 5.68287 | 0.639857 |
| SLC12A6  | 6.38817 | 0.661091 |
| SLC12A8  | 5.04868 | 0.810562 |
| SLC12A9  | 5.99677 | 0.408547 |
| SLC15A2  | 6.83451 | 0.971877 |
| SLC15A3  | 5.267   | 0.657663 |
| SLC16A1  | 5.59041 | 0.608078 |
| SLC16A14 | 6.81846 | 1.76711  |
| SLC16A3  | 5.77719 | 0.517674 |
| SLC16A6  | 6.30894 | 1.10838  |
| SLC16A7  | 6.13985 | 0.914228 |
| SLC17A5  | 6.70554 | 0.683977 |
| SLC17A9  | 6.71833 | 0.611034 |
| SLC18B1  | 5.43296 | 0.958247 |
| SLC19A2  | 4.83628 | 0.915779 |
| SLC1A4   | 8.46569 | 0.55993  |
| SLC1A5   | 8.20089 | 0.643654 |
| SLC20A1  | 7.87506 | 0.804649 |
| SLC22A15 | 5.14119 | 0.953861 |
| SLC22A17 | 4.95265 | 0.499901 |
| SLC22A18 | 6.82254 | 0.62289  |
| SLC22A31 | 6.53567 | 0.630106 |

|          |         |          |
|----------|---------|----------|
| SLC25A1  | 5.70561 | 0.516716 |
| SLC25A11 | 6.5523  | 0.486607 |
| SLC25A12 | 6.51412 | 0.549959 |
| SLC25A14 | 7.02205 | 0.517927 |
| SLC25A19 | 7.38525 | 0.474281 |
| SLC25A20 | 7.49741 | 0.767813 |
| SLC25A22 | 6.58184 | 0.423025 |
| SLC25A23 | 6.42427 | 0.476885 |
| SLC25A25 | 6.28603 | 0.439401 |
| SLC25A26 | 7.30686 | 0.455766 |
| SLC25A3  | 8.30327 | 0.42495  |
| SLC25A32 | 8.055   | 0.687529 |
| SLC25A33 | 7.04059 | 0.687482 |
| SLC25A36 | 7.77093 | 0.653615 |
| SLC25A37 | 4.99788 | 0.539105 |
| SLC25A38 | 7.93419 | 0.484242 |
| SLC25A39 | 7.78563 | 0.527647 |
| SLC25A40 | 6.37922 | 0.49268  |
| SLC25A43 | 4.98711 | 1.06008  |
| SLC25A44 | 6.45473 | 0.457783 |
| SLC25A45 | 5.54608 | 0.477119 |
| SLC25A46 | 8.69048 | 0.628381 |
| SLC25A5  | 11.0337 | 0.618688 |
| SLC25A6  | 11.2819 | 0.622145 |
| SLC26A11 | 7.34559 | 0.530797 |
| SLC26A2  | 6.76756 | 0.631791 |
| SLC26A6  | 5.7382  | 0.457053 |
| SLC27A3  | 6.40318 | 0.907865 |
| SLC29A1  | 5.86405 | 0.491245 |
| SLC2A10  | 4.88664 | 1.60255  |
| SLC2A11  | 5.98564 | 0.447266 |
| SLC2A5   | 5.72719 | 0.98268  |
| SLC2A6   | 5.62276 | 0.462965 |
| SLC30A1  | 6.33346 | 0.52954  |
| SLC30A5  | 6.68023 | 0.517651 |
| SLC30A7  | 7.28284 | 0.619866 |
| SLC30A9  | 6.59063 | 0.514483 |
| SLC31A1  | 5.88811 | 0.401826 |
| SLC31A2  | 6.56588 | 0.706429 |
| SLC33A1  | 7.49008 | 0.580486 |
| SLC35A1  | 8.07056 | 0.660978 |
| SLC35A2  | 6.01073 | 0.415434 |
| SLC35A3  | 6.67489 | 0.643091 |
| SLC35A4  | 7.87728 | 0.458224 |
| SLC35A5  | 8.43739 | 0.670029 |
| SLC35B1  | 9.43601 | 0.625169 |
| SLC35B2  | 7.38075 | 0.49095  |

|          |         |          |
|----------|---------|----------|
| SLC35B3  | 6.84964 | 0.516357 |
| SLC35B4  | 5.77253 | 0.626753 |
| SLC35D1  | 5.98278 | 0.464674 |
| SLC35D2  | 5.32798 | 0.524179 |
| SLC35E2  | 7.07155 | 0.507128 |
| SLC35E2B | 7.07155 | 0.507128 |
| SLC35F1  | 5.70502 | 0.907068 |
| SLC35F2  | 7.24605 | 0.888136 |
| SLC35G2  | 4.99662 | 0.789143 |
| SLC37A3  | 5.63991 | 0.647821 |
| SLC38A1  | 7.25602 | 0.510733 |
| SLC38A2  | 10.5377 | 0.714519 |
| SLC38A5  | 7.23656 | 0.853169 |
| SLC38A9  | 6.07743 | 0.53737  |
| SLC39A1  | 5.92733 | 0.450315 |
| SLC39A10 | 5.97407 | 0.92099  |
| SLC39A11 | 6.01372 | 0.520708 |
| SLC39A14 | 5.80884 | 0.438289 |
| SLC39A4  | 6.65156 | 1.02961  |
| SLC39A6  | 7.61703 | 0.698654 |
| SLC39A7  | 7.27608 | 0.647075 |
| SLC39A8  | 6.19707 | 0.489541 |
| SLC3A2   | 8.66652 | 0.685248 |
| SLC40A1  | 5.92982 | 1.05535  |
| SLC41A1  | 6.72026 | 0.50891  |
| SLC41A2  | 5.39621 | 0.62568  |
| SLC41A3  | 7.02744 | 0.458487 |
| SLC43A1  | 6.14911 | 0.702373 |
| SLC44A1  | 8.07978 | 0.760964 |
| SLC46A3  | 5.27945 | 0.988881 |
| SLC47A1  | 6.4378  | 1.79677  |
| SLC4A1   | 4.87318 | 0.497352 |
| SLC4A1AP | 6.82776 | 0.481561 |
| SLC4A2   | 6.37924 | 0.435821 |
| SLC4A3   | 4.93607 | 0.427814 |
| SLC50A1  | 7.53247 | 0.675932 |
| SLC52A2  | 7.06937 | 0.577047 |
| SLC5A11  | 5.17623 | 0.410085 |
| SLC5A3   | 5.52466 | 0.530999 |
| SLC5A6   | 7.06999 | 0.52803  |
| SLC6A9   | 4.84197 | 0.539513 |
| SLC7A1   | 6.08105 | 0.42222  |
| SLC7A11  | 4.85078 | 0.894761 |
| SLC7A5   | 7.44116 | 1.2376   |
| SLC7A5P1 | 5.36874 | 0.4194   |
| SLC7A6   | 6.20655 | 0.429548 |
| SLC7A6OS | 5.6143  | 0.431898 |



|               |         |          |
|---------------|---------|----------|
| SLC7A7        | 8.09865 | 1.09964  |
| SLC8A3        | 4.8542  | 0.483705 |
| SLC9A3R1      | 7.90915 | 0.54868  |
| SLC9A6        | 7.22806 | 0.785582 |
| SLC9A8        | 5.61535 | 0.495685 |
| SLC9A9        | 5.71897 | 0.564478 |
| SLC9B2        | 5.81052 | 0.677711 |
| SLCO3A1       | 5.39937 | 0.886385 |
| SLCO4A1       | 5.62947 | 0.50654  |
| SLCO5A1       | 5.48344 | 0.89821  |
| SLFN11        | 6.45508 | 1.08521  |
| SLFN13        | 5.3354  | 0.701271 |
| SLFN5         | 5.62039 | 0.859515 |
| SLIRP         | 9.15132 | 0.662853 |
| SLK           | 6.17607 | 0.684917 |
| SLMO2         | 6.90931 | 0.542956 |
| SLPI          | 5.52913 | 0.536165 |
| SLTM          | 8.69184 | 0.490316 |
| SLU7          | 7.94934 | 0.517028 |
| SLX1B-SULT1A4 | 7.52912 | 0.47243  |
| SLX4IP        | 5.68432 | 0.540691 |
| SMA4          | 6.12568 | 0.855268 |
| SMA5          | 5.87095 | 1.09868  |
| SMAD1         | 6.08965 | 2.00704  |
| SMAD2         | 6.23903 | 0.422976 |
| SMAD3         | 5.48356 | 0.48043  |
| SMAD5         | 6.60166 | 0.637117 |
| SMAD7         | 5.90977 | 1.17563  |
| SMAGP         | 5.86428 | 0.912712 |
| SMAP1         | 8.37974 | 0.678451 |
| SMAP2         | 8.19327 | 1.1897   |
| SMARCA5       | 6.8402  | 0.452102 |
| SMARCAD1      | 7.22946 | 0.628293 |
| SMARCAL1      | 6.26753 | 0.425574 |
| SMARCC1       | 6.98913 | 0.519064 |
| SMC2          | 5.861   | 0.896403 |
| SMC3          | 6.36734 | 0.61845  |
| SMC4          | 7.40867 | 0.778579 |
| SMC5          | 5.38128 | 0.468392 |
| SMC6          | 6.16063 | 0.521928 |
| SMCHD1        | 6.42975 | 0.622334 |
| SMCO4         | 6.712   | 1.09213  |
| SMEK1         | 6.86432 | 0.580335 |
| SMG1          | 6.20894 | 0.650432 |
| SMG1P1        | 5.90619 | 0.661313 |
| SMG1P2        | 7.27906 | 0.652523 |
| SMG1P3        | 5.58748 | 0.517352 |

|          |         |          |
|----------|---------|----------|
| SMG1P5   | 7.34549 | 0.615271 |
| SMG1P7   | 5.98226 | 0.909193 |
| SMG7     | 6.07277 | 0.459197 |
| SMG8     | 7.33377 | 0.74569  |
| SMIM1    | 5.87364 | 0.453799 |
| SMIM13   | 4.84803 | 0.474796 |
| SMIM14   | 5.57093 | 0.837831 |
| SMIM15   | 9.07202 | 0.584472 |
| SMIM19   | 8.99331 | 0.577763 |
| SMIM20   | 8.29127 | 0.530745 |
| SMIM24   | 5.00516 | 0.417725 |
| SMN1     | 6.45094 | 0.79348  |
| SMN2     | 6.45094 | 0.79348  |
| SMNDC1   | 8.01758 | 0.597473 |
| SMOC1    | 7.02986 | 0.737162 |
| SMOX     | 5.75335 | 0.443995 |
| SMPD2    | 6.42131 | 0.433895 |
| SMPD3    | 4.96817 | 0.41189  |
| SMPD4    | 6.54243 | 0.478868 |
| SMPDL3B  | 6.17974 | 0.638551 |
| SMS      | 5.94773 | 0.640694 |
| SMYD3    | 7.26962 | 1.07656  |
| SNAI1    | 5.1934  | 0.544914 |
| SNAP23   | 6.56113 | 0.540817 |
| SNAP29   | 6.13722 | 0.420755 |
| SNAP47   | 7.65759 | 0.630506 |
| SNAPC1   | 5.77225 | 0.637268 |
| SNAPC3   | 5.0811  | 0.497422 |
| SNAPIN   | 8.28036 | 0.633065 |
| SNCA     | 5.25953 | 0.499672 |
| SND1-IT1 | 7.37224 | 0.75814  |
| SNF8     | 8.27262 | 0.415293 |
| SNHG1    | 10.3579 | 0.744911 |
| SNHG12   | 6.98337 | 0.565306 |
| SNHG15   | 7.70465 | 0.577097 |
| SNHG16   | 8.77841 | 0.714813 |
| SNHG17   | 6.44868 | 0.540816 |
| SNHG18   | 5.20699 | 0.504328 |
| SNHG19   | 8.22586 | 1.11893  |
| SNHG20   | 5.28603 | 0.687087 |
| SNHG5    | 11.4678 | 1.08264  |
| SNHG6    | 11.5802 | 0.521396 |
| SNHG7    | 6.36968 | 0.485909 |
| SNHG8    | 9.22646 | 0.708583 |
| SNHG9    | 6.1513  | 0.813622 |
| SNIP1    | 5.66073 | 0.441534 |
| SNN      | 5.38004 | 0.65571  |

|          |         |          |
|----------|---------|----------|
| SNORA1   | 8.83222 | 0.80499  |
| SNORA11D | 5.37218 | 1.05267  |
| SNORA11E | 5.37218 | 1.05267  |
| SNORA16A | 6.98337 | 0.565306 |
| SNORA17  | 6.36968 | 0.485909 |
| SNORA18  | 8.83222 | 0.80499  |
| SNORA21  | 7.69348 | 0.432615 |
| SNORA24  | 9.22646 | 0.708583 |
| SNORA28  | 8.73188 | 1.08578  |
| SNORA29  | 6.99147 | 0.557052 |
| SNORA32  | 8.83222 | 0.80499  |
| SNORA4   | 10.3277 | 0.543255 |
| SNORA40  | 8.83222 | 0.80499  |
| SNORA44  | 6.98337 | 0.565306 |
| SNORA48  | 10.5157 | 0.552191 |
| SNORA56  | 8.43967 | 0.685712 |
| SNORA5B  | 6.62495 | 0.489659 |
| SNORA6   | 13.2859 | 0.42065  |
| SNORA61  | 6.98337 | 0.565306 |
| SNORA62  | 13.2859 | 0.42065  |
| SNORA63  | 10.3277 | 0.543255 |
| SNORA64  | 12.0635 | 0.644486 |
| SNORA67  | 9.14369 | 0.419904 |
| SNORA72  | 4.84381 | 0.567726 |
| SNORA76C | 8.57204 | 0.702111 |
| SNORA78  | 6.30758 | 0.495781 |
| SNORA8   | 8.83222 | 0.80499  |
| SNORA81  | 10.3277 | 0.543255 |
| SNORA9   | 7.70465 | 0.577097 |
| SNORD10  | 10.5157 | 0.552191 |
| SNORD104 | 8.57204 | 0.702111 |
| SNORD110 | 7.98352 | 0.525796 |
| SNORD16  | 13.1731 | 0.415466 |
| SNORD18A | 13.1731 | 0.415466 |
| SNORD18B | 13.1731 | 0.415466 |
| SNORD18C | 13.1731 | 0.415466 |
| SNORD19B | 9.50692 | 0.591487 |
| SNORD1A  | 8.77841 | 0.714813 |
| SNORD1C  | 8.77841 | 0.714813 |
| SNORD2   | 10.3277 | 0.543255 |
| SNORD22  | 10.3579 | 0.744911 |
| SNORD23  | 11.0444 | 0.701814 |
| SNORD25  | 10.3579 | 0.744911 |
| SNORD26  | 10.3579 | 0.744911 |
| SNORD27  | 10.3579 | 0.744911 |
| SNORD28  | 10.3579 | 0.744911 |
| SNORD29  | 10.3579 | 0.744911 |

|           |         |          |
|-----------|---------|----------|
| SNORD30   | 10.3579 | 0.744911 |
| SNORD31   | 10.3579 | 0.744911 |
| SNORD38B  | 12.5469 | 0.407493 |
| SNORD3A   | 10.7878 | 1.33264  |
| SNORD3B-1 | 10.7878 | 1.33264  |
| SNORD3B-2 | 10.7878 | 1.33264  |
| SNORD3C   | 10.7878 | 1.33264  |
| SNORD3D   | 10.7878 | 1.33264  |
| SNORD44   | 9.99816 | 0.764737 |
| SNORD45A  | 8.24294 | 0.819725 |
| SNORD45B  | 8.24294 | 0.819725 |
| SNORD45C  | 8.24294 | 0.819725 |
| SNORD47   | 9.99816 | 0.764737 |
| SNORD4A   | 8.45735 | 0.608232 |
| SNORD5    | 8.83222 | 0.80499  |
| SNORD50A  | 9.66519 | 0.800465 |
| SNORD50B  | 9.66519 | 0.800465 |
| SNORD55   | 12.5469 | 0.407493 |
| SNORD57   | 7.98352 | 0.525796 |
| SNORD74   | 9.99816 | 0.764737 |
| SNORD76   | 9.99816 | 0.764737 |
| SNORD77   | 9.99816 | 0.764737 |
| SNORD79   | 9.99816 | 0.764737 |
| SNORD80   | 9.99816 | 0.764737 |
| SNORD81   | 9.99816 | 0.764737 |
| SNORD84   | 7.57275 | 0.550332 |
| SNORD86   | 7.98352 | 0.525796 |
| SNORD87   | 11.5802 | 0.521396 |
| SNORD88C  | 7.28158 | 0.619069 |
| SNORD89   | 6.56136 | 0.746375 |
| SNORD95   | 9.77596 | 0.472575 |
| SNORD96A  | 9.77596 | 0.472575 |
| SNRNP25   | 7.92719 | 0.617045 |
| SNRNP27   | 8.14024 | 0.472746 |
| SNRNP40   | 6.72016 | 0.670324 |
| SNRNP48   | 5.02828 | 0.623779 |
| SNRNP70   | 7.216   | 0.5038   |
| SNRPA1    | 8.20961 | 0.444875 |
| SNRPB     | 8.88742 | 0.501509 |
| SNRPD1    | 7.89566 | 0.635289 |
| SNRPD2    | 11.4423 | 0.49924  |
| SNRPD3    | 9.26255 | 0.527206 |
| SNRPE     | 7.14583 | 0.48639  |
| SNRPF     | 8.584   | 0.647555 |
| SNRPG     | 10.0839 | 0.627766 |
| SNUPN     | 7.57269 | 0.520386 |
| SNURF     | 8.09762 | 0.625009 |

|           |         |          |
|-----------|---------|----------|
| SNW1      | 7.83828 | 0.578465 |
| SNX1      | 6.17849 | 0.42927  |
| SNX10     | 6.43287 | 1.15064  |
| SNX13     | 5.09929 | 0.425266 |
| SNX14     | 6.84371 | 0.513562 |
| SNX18     | 6.37272 | 0.494915 |
| SNX27     | 6.24876 | 0.417355 |
| SNX3      | 9.57583 | 0.497164 |
| SNX30     | 5.55069 | 0.723707 |
| SNX4      | 6.39779 | 0.559085 |
| SNX5      | 6.75639 | 0.462741 |
| SNX6      | 7.89592 | 0.586704 |
| SNX8      | 5.23521 | 0.407183 |
| SNX9      | 4.8398  | 1.36629  |
| SOAT1     | 5.83709 | 0.646442 |
| SOCS2     | 5.38545 | 0.793456 |
| SOCS3     | 5.40024 | 0.730763 |
| SOCS4     | 5.09191 | 0.531868 |
| SOCS5     | 6.11016 | 0.618576 |
| SOD1      | 10.6695 | 0.543859 |
| SOD2      | 5.69819 | 0.6283   |
| SOD3      | 6.22809 | 0.492239 |
| SOHLH1    | 5.92934 | 0.450642 |
| SON       | 9.17226 | 0.495629 |
| SORD      | 4.92196 | 0.695462 |
| SORT1     | 5.96549 | 0.927809 |
| SOS1      | 6.31028 | 0.477666 |
| SOWAHC    | 5.54663 | 1.45257  |
| SOX15     | 5.95479 | 0.403091 |
| SOX4      | 5.22682 | 1.03957  |
| SP1       | 5.9826  | 0.494767 |
| SP100     | 6.01716 | 0.520018 |
| SP110     | 7.50111 | 0.700034 |
| SP140     | 7.14699 | 0.723462 |
| SP4       | 6.01092 | 0.448012 |
| SPACA3    | 4.86842 | 1.02766  |
| SPAG1     | 5.03413 | 0.823374 |
| SPAG4     | 9.05414 | 1.30784  |
| SPAG5     | 6.51188 | 0.765934 |
| SPAG5-AS1 | 5.2624  | 0.434249 |
| SPAG7     | 8.60317 | 0.411055 |
| SPAG9     | 6.08602 | 0.467393 |
| SPANXA1   | 4.90249 | 0.481478 |
| SPANXA2   | 4.90249 | 0.481478 |
| SPAST     | 5.07093 | 0.594118 |
| SPATA20   | 7.43233 | 0.557155 |
| SPATA21   | 5.36206 | 0.44105  |

|                 |         |          |
|-----------------|---------|----------|
| SPATA2L         | 6.13334 | 0.429031 |
| SPATA5L1        | 5.32442 | 0.498106 |
| SPATA7          | 5.08896 | 0.465948 |
| SPATC1L         | 6.30805 | 0.735754 |
| SPATS2          | 7.36595 | 0.502753 |
| SPATS2L         | 5.15861 | 0.571284 |
| SPCS1           | 12.4857 | 0.407376 |
| SPCS2           | 10.6587 | 0.402638 |
| SPCS3           | 10.5964 | 0.536715 |
| SPDL1           | 5.14067 | 0.748723 |
| SPDYE1          | 5.34776 | 0.483352 |
| SPDYE2          | 6.02343 | 0.438114 |
| SPDYE2B         | 5.34776 | 0.483352 |
| SPDYE5          | 5.34776 | 0.483352 |
| SPDYE6          | 5.34776 | 0.483352 |
| SPECC1L         | 6.26399 | 0.4564   |
| SPECC1L-ADORA2A | 6.77997 | 0.634214 |
| SPEF2           | 5.20847 | 0.625513 |
| SPEM1           | 4.99925 | 0.488474 |
| SPEN            | 6.83747 | 0.534768 |
| SPG20           | 4.87686 | 0.43053  |
| SPHAR           | 6.4089  | 1.10102  |
| SPIN1           | 6.49641 | 0.657021 |
| SPIN2B          | 6.14275 | 0.444846 |
| SPINK2          | 5.64843 | 1.16404  |
| SPINT1          | 5.66605 | 0.482313 |
| SPINT2          | 7.86542 | 1.77971  |
| SPN             | 6.78324 | 0.445278 |
| SPNS1           | 6.69217 | 0.428149 |
| SPOCK2          | 6.36966 | 0.571777 |
| SPON2           | 5.42922 | 0.685286 |
| SPOP            | 6.78561 | 0.441374 |
| SPOPL           | 6.8169  | 0.556773 |
| SPPL2A          | 6.74117 | 0.712758 |
| SPR             | 6.5162  | 0.484182 |
| SPRED3          | 7.04238 | 0.410728 |
| SPRR2B          | 5.1769  | 0.410475 |
| SPRY1           | 5.41123 | 0.556796 |
| SPRY4           | 4.87232 | 0.405458 |
| SPRYD3          | 7.34953 | 0.416221 |
| SPRYD4          | 6.03181 | 0.416903 |
| SPSB2           | 5.89166 | 0.411631 |
| SPTBN2          | 5.81208 | 0.530398 |
| SPTSSA          | 7.46356 | 0.681436 |
| SPTY2D1         | 6.70159 | 0.62065  |
| SQLE            | 5.32445 | 0.625515 |
| SQRDL           | 9.43925 | 0.591198 |

|           |         |          |
|-----------|---------|----------|
| SQSTM1    | 7.40408 | 0.418479 |
| SRA1      | 8.10401 | 0.488977 |
| SRBD1     | 6.64657 | 0.644571 |
| SRCRB4D   | 5.96375 | 0.410758 |
| SRD5A3    | 5.13324 | 0.59622  |
| SREK1     | 5.95238 | 0.508173 |
| SREK1IP1  | 6.50322 | 0.530503 |
| SRFBP1    | 5.37086 | 0.731366 |
| SRGAP2    | 5.1416  | 0.526764 |
| SRGAP2B   | 5.02697 | 0.472645 |
| SRGAP2C   | 5.21728 | 0.549039 |
| SRGN      | 10.5518 | 0.622162 |
| SRI       | 7.33481 | 0.536896 |
| SRM       | 8.91668 | 0.736213 |
| SRP14     | 11.4767 | 0.474383 |
| SRP19     | 7.4779  | 0.407676 |
| SRP54     | 8.78341 | 0.661144 |
| SRP68     | 9.21823 | 0.425528 |
| SRP72     | 8.18578 | 0.409352 |
| SRP9      | 10.8447 | 0.723405 |
| SRPK1     | 7.27111 | 0.533797 |
| SRPK2     | 6.06192 | 0.510149 |
| SRPR      | 10.3123 | 0.498405 |
| SRPRB     | 9.23801 | 0.440783 |
| SRRD      | 6.57588 | 0.549725 |
| SRRM1     | 8.24372 | 0.430518 |
| SRSF10    | 7.3884  | 0.46847  |
| SRSF11    | 7.05104 | 0.634635 |
| SRSF2     | 10.1927 | 0.425978 |
| SRSF3     | 8.2422  | 0.45569  |
| SRSF4     | 6.15099 | 0.454202 |
| SRSF5     | 8.91545 | 0.633719 |
| SRSF6     | 8.28009 | 0.777615 |
| SRSF7     | 8.65834 | 0.51031  |
| SRSF8     | 7.57911 | 0.473352 |
| SRSF9     | 9.05713 | 0.444176 |
| SRXN1     | 6.97828 | 0.471807 |
| SS18      | 7.16523 | 0.496204 |
| SS18L1    | 6.20568 | 0.655723 |
| SS18L2    | 9.04978 | 0.500046 |
| SSB       | 8.2807  | 0.597313 |
| SSBP1     | 7.74918 | 0.520207 |
| SSBP2     | 4.8688  | 0.543522 |
| SSBP3     | 5.76869 | 0.584451 |
| SSBP3-AS1 | 4.94112 | 0.405865 |
| SSBP4     | 6.71395 | 0.555956 |
| SSC5D     | 6.50293 | 0.499965 |

|                        |         |          |
|------------------------|---------|----------|
| SSFA2                  | 5.33467 | 0.426131 |
| SSNA1                  | 7.29772 | 0.415772 |
| SSPN                   | 5.23749 | 0.701475 |
| SSR1                   | 9.80551 | 0.662024 |
| SSR2                   | 11.4356 | 0.479315 |
| SSR3                   | 9.71653 | 0.624899 |
| SSR4                   | 13.4108 | 0.645517 |
| SSRP1                  | 7.52781 | 0.432759 |
| SSSCA1                 | 8.21477 | 0.542167 |
| SSX2                   | 4.99153 | 0.725098 |
| SSX5                   | 5.13379 | 0.437763 |
| SSX7                   | 5.13379 | 0.437763 |
| ST13                   | 8.40919 | 0.54472  |
| ST14                   | 5.19616 | 0.624408 |
| ST3GAL1                | 5.08942 | 0.697814 |
| ST3GAL5                | 8.18482 | 0.68539  |
| ST3GAL6                | 6.667   | 0.837051 |
| ST5                    | 5.21628 | 0.71516  |
| ST6GAL1                | 7.45865 | 0.622949 |
| ST6GALNAC4             | 7.24194 | 0.483544 |
| ST7                    | 6.36975 | 0.442949 |
| ST7-OT3                | 6.36975 | 0.442949 |
| ST8SIA4                | 6.24034 | 0.940067 |
| ST8SIA6-AS1            | 5.25209 | 0.980482 |
| STAG1                  | 6.8033  | 0.414411 |
| STAG2                  | 8.57685 | 0.697713 |
| STAG3L1                | 6.13622 | 0.564654 |
| STAG3L2                | 6.27325 | 0.591426 |
| STAG3L3                | 6.0724  | 0.504136 |
| STAG3L4                | 5.21396 | 0.479163 |
| STAG3L5P-PVRIG2P-PILRB | 7.8853  | 0.714721 |
| STAM                   | 6.68871 | 0.67587  |
| STAM2                  | 5.46291 | 0.415977 |
| STAP1                  | 8.10747 | 1.81785  |
| STAP2                  | 5.12849 | 0.45825  |
| STARD10                | 6.10416 | 0.45777  |
| STARD3NL               | 8.04902 | 0.618424 |
| STARD4                 | 6.71855 | 0.770255 |
| STARD5                 | 7.71941 | 0.894532 |
| STARD9                 | 5.79204 | 0.505077 |
| STAT1                  | 8.22322 | 0.961961 |
| STAT2                  | 7.1208  | 0.472444 |
| STAT3                  | 7.13299 | 0.536447 |
| STAT4                  | 6.60319 | 1.16062  |
| STAT6                  | 5.94417 | 0.430063 |
| STAU1                  | 8.75612 | 0.465717 |
| STEAP1B                | 5.59996 | 0.955013 |



|         |         |          |
|---------|---------|----------|
| STEAP3  | 5.02787 | 0.476282 |
| STIL    | 5.05548 | 0.71513  |
| STIM2   | 5.91211 | 0.414596 |
| STIP1   | 7.88225 | 0.58248  |
| STK10   | 6.40354 | 0.413406 |
| STK11IP | 5.90273 | 0.400128 |
| STK17A  | 5.78964 | 0.760502 |
| STK17B  | 6.62561 | 1.07912  |
| STK25   | 5.77202 | 0.521063 |
| STK38L  | 6.03904 | 0.605409 |
| STK4    | 6.23289 | 0.50345  |
| STMN1   | 5.90209 | 0.447142 |
| STOM    | 6.82651 | 0.783351 |
| STOML2  | 8.70996 | 0.597904 |
| STRA13  | 8.01585 | 0.434991 |
| STRADB  | 7.07707 | 0.642518 |
| STRAP   | 7.77564 | 0.625611 |
| STRBP   | 7.85137 | 0.666171 |
| STRIP1  | 6.03227 | 0.460662 |
| STRN3   | 5.72368 | 0.55384  |
| STRN4   | 5.68526 | 0.425838 |
| STS     | 5.42415 | 0.823377 |
| STT3A   | 9.99984 | 0.732045 |
| STT3B   | 10.6036 | 0.784807 |
| STX10   | 6.73531 | 0.402088 |
| STX11   | 5.59481 | 0.866218 |
| STX12   | 7.30007 | 0.540938 |
| STX16   | 6.97555 | 0.52744  |
| STX17   | 6.35522 | 0.454043 |
| STX3    | 5.17368 | 0.406649 |
| STX5    | 6.62177 | 0.479505 |
| STX7    | 5.72037 | 0.525777 |
| STXBP3  | 5.61168 | 0.635213 |
| STXBP6  | 5.10966 | 1.01589  |
| STYX    | 5.3455  | 0.637381 |
| SUB1    | 10.2964 | 0.436726 |
| SUCLA2  | 6.80596 | 0.990158 |
| SUCLG2  | 8.64069 | 0.568909 |
| SUCO    | 8.26868 | 0.650697 |
| SUDS3   | 5.97883 | 0.677925 |
| SUGT1   | 5.8768  | 0.407884 |
| SULF2   | 8.09153 | 2.39303  |
| SULT1A1 | 7.20677 | 0.474063 |
| SULT1A2 | 7.06583 | 0.494258 |
| SUMF1   | 7.40278 | 0.565586 |
| SUMF2   | 9.02159 | 0.704121 |
| SUMO1   | 7.29826 | 0.407837 |

|               |         |          |
|---------------|---------|----------|
| SUMO4         | 8.00182 | 0.442874 |
| SUN2          | 7.03003 | 0.456051 |
| SUPT16H       | 7.03626 | 0.648354 |
| SUPT3H        | 5.14766 | 0.672322 |
| SUPV3L1       | 6.48789 | 0.586245 |
| SURF2         | 5.95803 | 0.437983 |
| SURF4         | 9.76181 | 0.40115  |
| SURF6         | 6.59694 | 0.405032 |
| SUSD1         | 5.03144 | 0.614416 |
| SUSD3         | 5.72486 | 0.486441 |
| SUV39H1       | 5.60041 | 0.445652 |
| SUV39H2       | 4.86093 | 0.539009 |
| SUV420H1      | 6.71249 | 0.494178 |
| SUZ12P1       | 5.70555 | 0.539937 |
| SVIP          | 8.56259 | 0.606111 |
| SWI5          | 7.03915 | 0.442349 |
| SWSAP1        | 5.53255 | 0.422469 |
| SWT1          | 6.43389 | 0.561374 |
| SYAP1         | 8.07738 | 0.45449  |
| SYK           | 4.93212 | 1.02005  |
| SYNCRIP       | 7.50889 | 0.469829 |
| SYNE2         | 4.84263 | 0.519447 |
| SYNE3         | 6.33966 | 0.607148 |
| SYNGR1        | 6.09171 | 0.559473 |
| SYNGR2        | 6.3934  | 0.449749 |
| SYNJ2BP       | 5.50445 | 0.726903 |
| SYNJ2BP-COX16 | 5.47597 | 0.659731 |
| SYNM          | 5.49381 | 1.35636  |
| SYNRG         | 6.62153 | 0.458063 |
| SYPL1         | 7.79696 | 1.3844   |
| SYT1          | 5.74134 | 1.56387  |
| SYTL1         | 7.78501 | 0.997052 |
| SYVN1         | 8.89844 | 0.542338 |
| TAB2          | 7.3969  | 0.707928 |
| TACC1         | 5.39715 | 0.525464 |
| TACC3         | 5.7431  | 0.630856 |
| TAF11         | 6.76749 | 0.479182 |
| TAF12         | 7.576   | 0.542623 |
| TAF13         | 5.30529 | 0.52216  |
| TAF15         | 6.38975 | 0.553474 |
| TAF1A         | 5.02524 | 0.828324 |
| TAF1A-AS1     | 4.91491 | 0.642741 |
| TAF1D         | 7.83804 | 0.757106 |
| TAF2          | 7.19664 | 0.415897 |
| TAF4B         | 6.91654 | 0.954745 |
| TAF5          | 5.23899 | 0.67549  |
| TAF6          | 7.17126 | 0.452253 |

|                  |         |          |
|------------------|---------|----------|
| TAF7             | 9.9041  | 0.654705 |
| TAF9             | 9.71182 | 0.583363 |
| TAF9B            | 6.44924 | 0.470622 |
| TAGAP            | 6.82472 | 0.940412 |
| TAGLN2           | 7.37337 | 0.961249 |
| TALDO1           | 9.33669 | 0.507521 |
| TANGO2           | 6.37026 | 0.400997 |
| TANK             | 6.27521 | 0.513785 |
| TAOK3            | 6.62019 | 0.451605 |
| TAP1             | 8.72802 | 0.632767 |
| TAP2             | 6.44548 | 0.416536 |
| TAPBP            | 7.81781 | 0.483602 |
| TAPBPL           | 8.76832 | 0.759796 |
| TAPT1-AS1        | 5.60593 | 0.775993 |
| TARBP1           | 7.0563  | 0.672033 |
| TARDBP           | 7.84796 | 0.570306 |
| TARS2            | 6.8063  | 0.424864 |
| TAS2R43          | 5.35379 | 0.638985 |
| TATDN1           | 8.05634 | 0.649488 |
| TATDN3           | 6.252   | 0.666548 |
| TAX1BP1          | 8.53661 | 0.497088 |
| TAX1BP3          | 5.92055 | 0.606799 |
| TBC1D1           | 5.2927  | 0.453447 |
| TBC1D10B         | 6.60187 | 0.482812 |
| TBC1D10C         | 6.73731 | 0.731492 |
| TBC1D14          | 7.6162  | 0.442729 |
| TBC1D15          | 6.24307 | 0.528867 |
| TBC1D23          | 7.04827 | 0.62473  |
| TBC1D27          | 7.05349 | 0.886161 |
| TBC1D3           | 7.00544 | 0.473434 |
| TBC1D30          | 4.92563 | 0.775709 |
| TBC1D3C          | 7.00544 | 0.473434 |
| TBC1D3F          | 7.00544 | 0.473434 |
| TBC1D3H          | 7.00544 | 0.473434 |
| TBC1D3P1-DHX40P1 | 6.14807 | 0.715527 |
| TBC1D9           | 8.66666 | 1.12883  |
| TBCA             | 11.02   | 0.573761 |
| TBCB             | 7.89628 | 0.586552 |
| TBCC             | 8.35763 | 0.510387 |
| TBCCD1           | 6.09626 | 0.622416 |
| TBCE             | 6.27011 | 0.619188 |
| TBCEL            | 6.9645  | 1.18073  |
| TBCK             | 7.12082 | 0.711695 |
| TBK1             | 7.29424 | 0.468343 |
| TBL1X            | 5.80404 | 0.505998 |
| TBL1XR1          | 6.95876 | 0.584402 |
| TBP              | 6.01207 | 0.420235 |

|            |         |          |
|------------|---------|----------|
| TBPL1      | 7.59944 | 0.684073 |
| TBX21      | 4.87986 | 0.54264  |
| TBXAS1     | 5.54089 | 1.18232  |
| TCEA3      | 4.99397 | 0.678295 |
| TCEAL1     | 6.50221 | 0.676169 |
| TCEAL3     | 7.98878 | 0.815139 |
| TCEAL4     | 7.93277 | 0.807143 |
| TCEAL8     | 7.94863 | 0.8685   |
| TCEB1      | 7.37371 | 0.596741 |
| TCEB3-AS1  | 6.61293 | 0.565961 |
| TCERG1     | 6.12398 | 0.539311 |
| TCF12      | 6.38479 | 0.547042 |
| TCF15      | 6.06178 | 0.561052 |
| TCF19      | 5.59398 | 0.906191 |
| TCF4       | 8.1733  | 1.67134  |
| TCFL5      | 4.86228 | 0.702312 |
| TCIRG1     | 8.07357 | 0.60871  |
| TCL1A      | 5.22267 | 0.459462 |
| TCN2       | 6.33574 | 0.749195 |
| TCP1       | 6.99147 | 0.557052 |
| TCTA       | 6.95529 | 0.509466 |
| TCTEX1D2   | 5.21859 | 0.714289 |
| TCTN1      | 6.44365 | 0.432151 |
| TCTN3      | 8.03052 | 0.452504 |
| TDG        | 6.91375 | 0.562907 |
| TDP2       | 8.44517 | 0.754179 |
| TDRD3      | 5.48437 | 0.433133 |
| TDRD7      | 7.16813 | 0.705547 |
| TDRG1      | 5.50173 | 0.416519 |
| TEC        | 4.96426 | 0.447346 |
| TEFM       | 5.93454 | 0.632724 |
| TEKT4P2    | 7.04277 | 0.694091 |
| TEN1       | 6.30427 | 0.497284 |
| TEP1       | 5.23977 | 0.434533 |
| TERF1      | 6.89778 | 0.581803 |
| TERF2IP    | 8.40083 | 0.603615 |
| TES        | 7.29847 | 0.448562 |
| TESK2      | 6.99523 | 0.56594  |
| TET1       | 4.83218 | 0.761142 |
| TET2       | 5.25666 | 0.645896 |
| TEX10      | 5.97233 | 0.521758 |
| TEX101     | 4.95157 | 0.500575 |
| TEX2       | 7.27301 | 0.415568 |
| TEX30      | 5.25606 | 0.554411 |
| TFAM       | 6.29431 | 0.515597 |
| TFAP2A-AS1 | 5.36856 | 0.562398 |
| TFCP2      | 6.09252 | 0.424341 |

|                |         |          |
|----------------|---------|----------|
| TFDP1          | 6.06724 | 0.649894 |
| TFDP2          | 5.56892 | 0.437411 |
| TFEB           | 6.41818 | 0.462006 |
| TFG            | 6.75112 | 0.449944 |
| TFPT           | 6.31118 | 0.417404 |
| TFRC           | 6.64949 | 0.411439 |
| TG             | 5.26067 | 0.522507 |
| TGDS           | 5.78011 | 0.679184 |
| TGFA           | 4.87333 | 0.673322 |
| TGFBI          | 5.47402 | 1.0796   |
| TGFBR1         | 5.36918 | 0.530165 |
| TGFBR2         | 5.56053 | 0.814908 |
| TGIF2          | 6.24055 | 0.52084  |
| TGIF2-C20orf24 | 10.386  | 0.410734 |
| TGOLN2         | 7.16149 | 0.432532 |
| THAP1          | 5.28201 | 0.760034 |
| THAP5          | 5.26663 | 0.514724 |
| THAP7          | 7.65419 | 0.430428 |
| THAP9-AS1      | 7.94497 | 0.64526  |
| THEG           | 4.81341 | 0.447464 |
| THEM4          | 6.69154 | 0.651035 |
| THEM6          | 5.14482 | 0.462607 |
| THEMIS2        | 6.99034 | 1.12255  |
| THG1L          | 7.0635  | 0.922467 |
| THOC1          | 7.56531 | 0.483139 |
| THOC2          | 7.03224 | 0.628488 |
| THOC3          | 7.14163 | 0.724943 |
| THOC6          | 5.78245 | 0.421063 |
| THOC7          | 9.16122 | 0.611133 |
| THOP1          | 5.9776  | 0.479805 |
| THRIL          | 6.35762 | 0.76255  |
| THSD1          | 5.34423 | 0.568436 |
| THTPA          | 7.54925 | 0.506247 |
| THUMPD1        | 7.88119 | 0.556345 |
| THUMPD2        | 6.147   | 0.503811 |
| THUMPD3        | 6.67412 | 0.419252 |
| THUMPD3-AS1    | 5.37618 | 0.532288 |
| THY1           | 5.48293 | 0.516642 |
| THYN1          | 7.75414 | 0.67269  |
| TIA1           | 6.68089 | 0.494039 |
| TIAM1          | 5.44454 | 0.863365 |
| TICAM1         | 6.65355 | 0.448638 |
| TICAM2         | 5.76709 | 0.512313 |
| TIFA           | 6.38502 | 0.64419  |
| TIGD1          | 6.48822 | 0.731022 |
| TIGD2          | 6.31203 | 0.799942 |
| TIMELESS       | 5.42104 | 0.409021 |

|         |         |          |
|---------|---------|----------|
| TIMM10  | 8.49951 | 0.602649 |
| TIMM10B | 6.9244  | 0.554727 |
| TIMM17A | 6.35668 | 0.417861 |
| TIMM21  | 7.13748 | 0.69088  |
| TIMM23B | 7.64007 | 0.480323 |
| TIMM44  | 6.67181 | 0.421644 |
| TIMM8B  | 7.93967 | 0.699988 |
| TIMM9   | 7.29311 | 0.582643 |
| TIMMDC1 | 8.61544 | 0.493664 |
| TIMP1   | 8.96998 | 2.0257   |
| TIMP2   | 6.87162 | 1.32279  |
| TIPARP  | 9.27252 | 0.871086 |
| TIPIN   | 6.00446 | 1.00163  |
| TIPRL   | 6.41211 | 0.72449  |
| TISP43  | 4.92248 | 0.429384 |
| TJP1    | 6.47893 | 1.69366  |
| TK1     | 5.44752 | 0.763216 |
| TKT     | 6.94878 | 0.481388 |
| TLCD1   | 5.03368 | 0.507602 |
| TLDC2   | 4.82987 | 0.433972 |
| TLE1    | 5.41488 | 0.901933 |
| TLE3    | 7.02677 | 0.591449 |
| TLE4    | 6.31369 | 0.668748 |
| TLR1    | 6.52368 | 1.13326  |
| TLR10   | 6.50334 | 1.44068  |
| TLR2    | 4.90369 | 0.491464 |
| TLR5    | 4.80589 | 0.415014 |
| TLR6    | 5.8205  | 0.619751 |
| TLR9    | 5.81222 | 0.651499 |
| TM2D1   | 5.85717 | 0.411253 |
| TM2D2   | 8.33427 | 0.632856 |
| TM2D3   | 6.91978 | 0.813045 |
| TM7SF2  | 6.98321 | 0.472446 |
| TM9SF2  | 10.5433 | 0.696526 |
| TM9SF4  | 8.10087 | 0.457873 |
| TMBIM1  | 6.90224 | 0.46861  |
| TMBIM6  | 10.6511 | 0.524131 |
| TMC4    | 5.30067 | 0.576994 |
| TMC6    | 6.2301  | 1.16381  |
| TMC8    | 5.34024 | 0.762047 |
| TMCC3   | 6.05022 | 1.00655  |
| TMCO1   | 9.65141 | 0.598706 |
| TMCO3   | 4.81088 | 0.400876 |
| TMCO6   | 5.53372 | 0.464546 |
| TMED10  | 9.16061 | 0.548318 |
| TMED2   | 10.7194 | 0.703034 |
| TMED5   | 6.8887  | 0.433823 |

|              |         |          |
|--------------|---------|----------|
| TMED7        | 8.02942 | 0.779156 |
| TMED7-TICAM2 | 6.89825 | 0.542396 |
| TMED9        | 10.581  | 0.438428 |
| TMEFF1       | 4.84889 | 1.59101  |
| TMEM101      | 6.69144 | 0.489643 |
| TMEM106B     | 7.36996 | 0.546086 |
| TMEM107      | 6.76083 | 0.74022  |
| TMEM109      | 8.24949 | 0.455978 |
| TMEM11       | 7.4538  | 0.407798 |
| TMEM115      | 6.25642 | 0.434003 |
| TMEM117      | 5.67388 | 0.534154 |
| TMEM120A     | 7.29718 | 0.542357 |
| TMEM123      | 9.87443 | 1.25096  |
| TMEM126A     | 9.46076 | 0.623147 |
| TMEM128      | 6.4921  | 0.675928 |
| TMEM133      | 5.81193 | 1.05755  |
| TMEM135      | 6.63704 | 0.457053 |
| TMEM138      | 8.03438 | 0.547324 |
| TMEM140      | 6.53158 | 0.816672 |
| TMEM147      | 9.80922 | 0.586213 |
| TMEM14A      | 8.29637 | 0.827783 |
| TMEM14B      | 9.65943 | 0.507972 |
| TMEM14C      | 10.0541 | 0.5492   |
| TMEM151A     | 5.10177 | 0.451536 |
| TMEM154      | 7.26373 | 1.15177  |
| TMEM156      | 5.70475 | 1.52082  |
| TMEM160      | 6.53303 | 0.506374 |
| TMEM161B     | 6.21561 | 0.413827 |
| TMEM161B-AS1 | 5.75891 | 0.442847 |
| TMEM164      | 6.14292 | 0.585681 |
| TMEM167A     | 9.88469 | 0.599025 |
| TMEM167B     | 8.18312 | 0.651756 |
| TMEM168      | 7.0109  | 0.717352 |
| TMEM173      | 6.42155 | 1.1142   |
| TMEM175      | 6.80758 | 0.410654 |
| TMEM176A     | 5.83635 | 0.76104  |
| TMEM176B     | 4.81461 | 0.602727 |
| TMEM179      | 4.94583 | 0.446793 |
| TMEM179B     | 8.64465 | 0.436963 |
| TMEM181      | 6.86339 | 0.760196 |
| TMEM183A     | 6.74953 | 0.469352 |
| TMEM183B     | 6.74953 | 0.469352 |
| TMEM184B     | 8.09239 | 0.892667 |
| TMEM184C     | 7.53586 | 0.513936 |
| TMEM185A     | 5.69071 | 0.570794 |
| TMEM185B     | 5.18089 | 0.511737 |
| TMEM186      | 6.5147  | 0.498639 |

|                |         |          |
|----------------|---------|----------|
| TMEM187        | 6.05091 | 0.609867 |
| TMEM19         | 7.29096 | 0.658862 |
| TMEM192        | 8.2217  | 0.515237 |
| TMEM194A       | 5.85618 | 0.735896 |
| TMEM2          | 5.70772 | 0.775295 |
| TMEM203        | 7.83767 | 0.571924 |
| TMEM205        | 10.0072 | 0.606049 |
| TMEM208        | 9.31253 | 0.586045 |
| TMEM209        | 6.13156 | 0.460332 |
| TMEM214        | 8.50523 | 0.528213 |
| TMEM216        | 7.23142 | 0.580763 |
| TMEM220        | 6.34456 | 1.26941  |
| TMEM230        | 10.5288 | 0.43688  |
| TMEM243        | 10.3956 | 0.668891 |
| TMEM245        | 6.96897 | 0.474182 |
| TMEM248        | 8.23426 | 0.427871 |
| TMEM251        | 7.00029 | 0.880289 |
| TMEM254        | 5.64881 | 0.410096 |
| TMEM255B       | 4.95161 | 0.429157 |
| TMEM256        | 8.68057 | 0.596883 |
| TMEM256-PLSCR3 | 7.49268 | 0.445814 |
| TMEM258        | 11.8947 | 0.452269 |
| TMEM260        | 6.72526 | 0.587155 |
| TMEM261        | 6.65883 | 0.444758 |
| TMEM30A        | 8.16603 | 0.742999 |
| TMEM33         | 6.85131 | 0.490464 |
| TMEM37         | 5.09131 | 0.44071  |
| TMEM38A        | 5.71161 | 0.496221 |
| TMEM38B        | 7.0282  | 0.631502 |
| TMEM39B        | 5.965   | 0.525259 |
| TMEM41A        | 6.84847 | 0.482788 |
| TMEM41B        | 7.84655 | 0.66087  |
| TMEM42         | 7.12638 | 0.471329 |
| TMEM44-AS1     | 6.28083 | 0.541829 |
| TMEM45A        | 8.13615 | 1.78105  |
| TMEM5          | 7.2492  | 0.550418 |
| TMEM50A        | 8.95087 | 0.436377 |
| TMEM50B        | 7.2849  | 0.425774 |
| TMEM51         | 5.87129 | 0.680719 |
| TMEM55A        | 5.77133 | 0.613679 |
| TMEM55B        | 7.22154 | 0.479306 |
| TMEM56         | 5.09757 | 0.979051 |
| TMEM57         | 6.96513 | 0.480106 |
| TMEM59         | 8.44974 | 0.521345 |
| TMEM60         | 7.5966  | 0.600012 |
| TMEM64         | 6.41044 | 0.814291 |
| TMEM68         | 5.08409 | 0.642377 |



|                 |         |          |
|-----------------|---------|----------|
| TMEM69          | 7.3912  | 0.767705 |
| TMEM87B         | 6.84116 | 0.675638 |
| TMEM9           | 7.66029 | 0.65055  |
| TMEM97          | 6.72303 | 0.828776 |
| TMEM99          | 5.93267 | 0.798907 |
| TMEM9B          | 8.33651 | 0.624633 |
| TMF1            | 6.61017 | 0.553368 |
| TMOD3           | 4.92022 | 0.452585 |
| TMPO            | 5.94041 | 0.78514  |
| TMPPE           | 8.82448 | 0.68948  |
| TMSB10          | 12.1772 | 0.567062 |
| TMSB15A         | 4.81914 | 0.895595 |
| TMSB4X          | 10.3285 | 2.02011  |
| TMTC2           | 6.60861 | 0.707151 |
| TMTC4           | 5.02709 | 0.479212 |
| TMUB1           | 6.78019 | 0.403159 |
| TMX1            | 9.39108 | 0.619381 |
| TMX2            | 9.40472 | 0.496506 |
| TMX3            | 5.7208  | 0.595501 |
| TMX4            | 6.74091 | 0.894416 |
| TNFAIP2         | 5.0929  | 0.491403 |
| TNFAIP3         | 9.23042 | 1.508    |
| TNFAIP8         | 8.00905 | 1.01725  |
| TNFAIP8L1       | 5.44832 | 0.603438 |
| TNFAIP8L2-SCNM1 | 8.15987 | 0.50158  |
| TNFRSF10A       | 6.13816 | 0.524402 |
| TNFRSF10B       | 5.54268 | 0.66402  |
| TNFRSF10D       | 4.94065 | 0.426705 |
| TNFRSF12A       | 6.27726 | 0.42221  |
| TNFRSF13B       | 7.8975  | 0.778293 |
| TNFRSF13C       | 5.99215 | 0.48353  |
| TNFRSF14        | 8.22468 | 0.631216 |
| TNFRSF17        | 12.3689 | 0.606543 |
| TNFRSF18        | 5.11198 | 0.929734 |
| TNFRSF1A        | 5.3834  | 0.550845 |
| TNFRSF1B        | 5.57631 | 0.409529 |
| TNFRSF4         | 5.0958  | 0.436256 |
| TNFSF10         | 7.4288  | 1.62525  |
| TNFSF12         | 4.86546 | 0.41091  |
| TNFSF12-TNFSF13 | 5.43662 | 0.511751 |
| TNFSF13         | 5.66946 | 0.65005  |
| TNFSF13B        | 5.12452 | 0.902031 |
| TNFSF8          | 5.18376 | 1.09104  |
| TNIP1           | 7.9934  | 0.729643 |
| TNKS2           | 5.63014 | 0.439409 |
| TNPO3           | 6.96036 | 0.42285  |
| TNRC6B          | 6.76407 | 0.571335 |

|            |         |          |
|------------|---------|----------|
| TNRC6C-AS1 | 4.93021 | 0.436038 |
| TNS3       | 6.832   | 0.635795 |
| TOB1       | 7.9637  | 1.08802  |
| TOMM20     | 10.3598 | 0.622846 |
| TOMM22     | 7.18751 | 0.418146 |
| TOMM34     | 6.1946  | 0.458754 |
| TOMM40L    | 5.83001 | 0.51137  |
| TOMM5      | 10.0948 | 0.566473 |
| TOMM6      | 10.4631 | 0.412488 |
| TOMM7      | 11.5499 | 0.514434 |
| TOMM70A    | 7.9679  | 0.679755 |
| TOP1       | 9.0748  | 0.632326 |
| TOP2B      | 8.84177 | 0.56332  |
| TOPBP1     | 7.56489 | 0.776293 |
| TOPORS     | 7.85777 | 0.823617 |
| TOPORS-AS1 | 7.71439 | 0.507627 |
| TOR1AIP1   | 5.94104 | 0.467777 |
| TOR1B      | 7.60785 | 0.582899 |
| TOR3A      | 8.05819 | 0.6421   |
| TP53       | 5.84064 | 0.814126 |
| TP53BP2    | 6.46339 | 0.710303 |
| TP53I3     | 5.72427 | 0.573728 |
| TP53INP1   | 7.47033 | 0.540871 |
| TP53INP2   | 6.4396  | 0.794209 |
| TP53RK     | 5.85661 | 0.716376 |
| TP53TG1    | 6.18666 | 0.565329 |
| TP73-AS1   | 4.94966 | 0.477956 |
| TPBG       | 4.8189  | 0.958171 |
| TPD52      | 9.13198 | 0.63853  |
| TPD52L1    | 4.94079 | 0.747753 |
| TPD52L2    | 7.13587 | 0.462069 |
| TPI1       | 7.46493 | 0.420891 |
| TPK1       | 5.46589 | 0.836654 |
| TPM4       | 7.06065 | 0.629958 |
| TPP1       | 7.65993 | 0.483612 |
| TPP2       | 6.31987 | 0.527498 |
| TPR        | 6.83269 | 0.5689   |
| TPRA1      | 6.11986 | 0.512042 |
| TPRG1L     | 7.36205 | 0.607206 |
| TPRKB      | 8.57409 | 0.574471 |
| TPST1      | 5.24999 | 0.495912 |
| TPST2      | 7.74085 | 1.07791  |
| TPX2       | 5.63614 | 1.12995  |
| TRA2A      | 7.58841 | 0.579614 |
| TRA2B      | 8.25277 | 0.407824 |
| TRABD2A    | 5.10478 | 0.518471 |
| TRAF3      | 6.27048 | 0.515754 |

|           |         |          |
|-----------|---------|----------|
| TRAF3IP3  | 5.8617  | 0.975652 |
| TRAF6     | 6.08493 | 0.409655 |
| TRAK2     | 6.69195 | 0.630256 |
| TRAM1     | 10.9808 | 0.413962 |
| TRAM2     | 7.85603 | 0.60426  |
| TRAM2-AS1 | 5.90487 | 0.470544 |
| TRANK1    | 6.54101 | 0.846795 |
| TRAPPC1   | 7.90781 | 0.62979  |
| TRAPPC10  | 6.21348 | 0.509319 |
| TRAPPC12  | 7.04396 | 0.455668 |
| TRAPPC2P1 | 7.74703 | 0.638789 |
| TRAPPC4   | 6.68084 | 0.522342 |
| TRAPPC5   | 7.98098 | 0.48021  |
| TRAPPC6A  | 8.11463 | 0.518829 |
| TRAPPC6B  | 6.39961 | 0.729753 |
| TRAPPC8   | 8.96332 | 0.562539 |
| TRAT1     | 5.94277 | 1.96658  |
| TRBC1     | 5.06107 | 0.531492 |
| TREML2    | 5.61767 | 0.532894 |
| TRG-AS1   | 7.10794 | 1.30297  |
| TRIAP1    | 8.30598 | 0.516814 |
| TRIB1     | 8.05308 | 0.584504 |
| TRIB2     | 5.86852 | 1.08177  |
| TRIB3     | 5.85021 | 0.684494 |
| TRIM13    | 4.94229 | 0.47154  |
| TRIM17    | 5.06031 | 0.407531 |
| TRIM21    | 5.98823 | 0.553469 |
| TRIM22    | 6.91117 | 1.96623  |
| TRIM23    | 5.37314 | 0.666536 |
| TRIM24    | 5.40493 | 0.4375   |
| TRIM27    | 7.72821 | 0.556041 |
| TRIM28    | 8.57377 | 0.634457 |
| TRIM32    | 5.10167 | 0.403712 |
| TRIM33    | 6.19367 | 0.480947 |
| TRIM37    | 6.12284 | 0.456948 |
| TRIM38    | 7.39572 | 0.470076 |
| TRIM41    | 6.93466 | 0.485524 |
| TRIM44    | 7.31318 | 0.466156 |
| TRIM47    | 6.24162 | 0.564206 |
| TRIM52    | 7.58567 | 0.655019 |
| TRIM56    | 6.9531  | 0.49386  |
| TRIM59    | 5.27092 | 0.842886 |
| TRIM68    | 5.27964 | 0.536129 |
| TRIM69    | 6.73969 | 0.570748 |
| TRIML2    | 5.05496 | 0.40507  |
| TRIP11    | 4.90392 | 0.409745 |
| TRIP12    | 6.95948 | 0.517563 |

|         |         |          |
|---------|---------|----------|
| TRIP13  | 5.41    | 1.04643  |
| TRIP4   | 7.01457 | 0.582632 |
| TRIP6   | 5.40824 | 0.484056 |
| TRIT1   | 6.64248 | 0.558719 |
| TRMT10C | 7.48902 | 0.715723 |
| TRMT11  | 7.39981 | 0.799756 |
| TRMT112 | 11.2861 | 0.438782 |
| TRMT12  | 6.71325 | 0.558925 |
| TRMT13  | 6.22846 | 0.873188 |
| TRMT1L  | 5.6137  | 0.762961 |
| TRMT2B  | 5.62138 | 0.427868 |
| TRMT5   | 7.6777  | 0.501047 |
| TRMT6   | 6.6858  | 0.513095 |
| TRMT61B | 6.9543  | 0.681181 |
| TRNT1   | 6.80658 | 0.720704 |
| TROAP   | 5.81125 | 0.521619 |
| TROVE2  | 6.69468 | 0.457525 |
| TRPM2   | 5.98894 | 0.423801 |
| TRPM4   | 5.4361  | 1.71731  |
| TRPV2   | 5.73093 | 0.495444 |
| TRPV4   | 5.29319 | 0.45202  |
| TRRAP   | 6.51729 | 0.616294 |
| TRUB2   | 7.54102 | 0.450268 |
| TSC1    | 7.29506 | 0.473157 |
| TSC22D3 | 8.65411 | 0.61087  |
| TSEN15  | 7.86098 | 0.735662 |
| TSEN2   | 5.7302  | 0.508549 |
| TSEN34  | 7.65852 | 0.493446 |
| TSG101  | 8.77826 | 0.443558 |
| TSHR    | 5.2464  | 1.11803  |
| TSHZ1   | 5.43622 | 0.752392 |
| TSN     | 7.24136 | 0.472291 |
| TSNAX   | 7.6051  | 0.813181 |
| TSPAN13 | 10.1056 | 1.01191  |
| TSPAN31 | 8.49384 | 0.51424  |
| TSPAN32 | 5.73048 | 0.414684 |
| TSPAN33 | 6.33197 | 0.461282 |
| TSPAN4  | 5.1714  | 0.497602 |
| TSPAN5  | 5.53079 | 0.666882 |
| TSPAN7  | 6.30692 | 2.01171  |
| TSPO    | 7.66047 | 0.800568 |
| TSPYL2  | 7.86838 | 0.56879  |
| TSPYL4  | 7.027   | 0.924873 |
| TSPYL5  | 5.58659 | 1.25681  |
| TSR1    | 6.45626 | 0.44815  |
| TSSC1   | 6.87137 | 0.413362 |
| TST     | 7.45425 | 0.683621 |

|              |         |          |
|--------------|---------|----------|
| TSTA3        | 7.53986 | 0.499104 |
| TSTD1        | 9.31466 | 0.650906 |
| TTC1         | 8.12751 | 0.489964 |
| TTC13        | 7.6914  | 0.729875 |
| TTC14        | 6.88607 | 0.599065 |
| TTC19        | 8.43588 | 0.499498 |
| TTC28        | 5.1041  | 0.622831 |
| TTC3         | 8.73101 | 0.559963 |
| TTC31        | 6.15556 | 0.48284  |
| TTC32        | 7.6458  | 0.546564 |
| TTC37        | 7.41652 | 0.648936 |
| TTC3P1       | 8.73101 | 0.559963 |
| TTC4         | 6.42091 | 0.557092 |
| TTC8         | 5.08175 | 0.832504 |
| TTC9C        | 5.28703 | 0.434234 |
| TTF1         | 6.57214 | 0.551298 |
| TTI1         | 6.48969 | 0.620466 |
| TTI2         | 5.97902 | 0.606594 |
| TTLL1        | 5.17552 | 0.412221 |
| TTLL12       | 6.3939  | 0.463902 |
| TTLL7        | 5.93228 | 0.949495 |
| TTLL7-IT1    | 4.98781 | 0.802972 |
| TTPAL        | 6.10169 | 0.430641 |
| TTYH2        | 5.39614 | 0.42017  |
| TUBA1A       | 5.96142 | 1.64418  |
| TUBA1B       | 9.82612 | 0.584036 |
| TUBA1C       | 10.7824 | 0.643507 |
| TUBA4A       | 8.9446  | 0.523858 |
| TUBB         | 9.73277 | 0.801352 |
| TUBB2A       | 6.27199 | 0.959626 |
| TUBB2B       | 5.07054 | 0.608203 |
| TUBB3        | 8.21443 | 0.490627 |
| TUBB4B       | 9.2525  | 0.583638 |
| TUBD1        | 5.15535 | 0.513752 |
| TUBG1        | 7.21969 | 0.885895 |
| TUBG2        | 5.68688 | 0.650312 |
| TUBGCP4      | 6.32935 | 0.461582 |
| TUBGCP5      | 5.53824 | 0.506484 |
| TUFT1        | 6.76781 | 1.04886  |
| TUSC1        | 6.48866 | 1.45595  |
| TUSC5        | 5.79012 | 0.466595 |
| TVP23B       | 7.94166 | 0.733812 |
| TVP23C       | 5.68033 | 0.51007  |
| TVP23C-CDRT4 | 5.81023 | 0.723584 |
| TWISTNB      | 5.03938 | 0.571034 |
| TWSG1        | 6.85329 | 0.824804 |
| TXLNG        | 6.07503 | 0.458624 |

|          |         |          |
|----------|---------|----------|
| TXLNGY   | 6.08478 | 2.33633  |
| TXN      | 9.27676 | 0.702608 |
| TXNDC11  | 9.81671 | 0.648998 |
| TXNDC12  | 7.59876 | 0.477544 |
| TXNDC15  | 10.0572 | 0.557401 |
| TXNDC16  | 6.20727 | 0.817659 |
| TXNDC17  | 7.22315 | 0.405992 |
| TXNDC9   | 6.04376 | 0.516522 |
| TXNIP    | 12.4994 | 0.63787  |
| TXNL1    | 6.96305 | 0.435933 |
| TYMP     | 5.51566 | 0.514041 |
| TYMS     | 6.2978  | 0.953398 |
| TYROBP   | 6.13097 | 1.11429  |
| TYW1     | 7.69994 | 0.428737 |
| TYW3     | 7.68482 | 0.635026 |
| U2AF1    | 7.77163 | 0.511906 |
| U2AF1L4  | 6.87808 | 0.474448 |
| U2SURP   | 6.97993 | 0.533293 |
| U50535   | 7.74081 | 0.788714 |
| U91328.2 | 5.68561 | 0.49635  |
| UAP1     | 11.1609 | 0.866591 |
| UBA2     | 7.50087 | 0.423593 |
| UBA3     | 8.4214  | 0.53492  |
| UBA5     | 8.8858  | 0.449954 |
| UBA6     | 5.40113 | 0.428063 |
| UBA7     | 7.42395 | 0.634991 |
| UBAC1    | 6.93939 | 0.471358 |
| UBAC2    | 5.52399 | 0.552136 |
| UBALD1   | 6.00565 | 0.443035 |
| UBALD2   | 8.80391 | 0.760151 |
| UBAP2    | 8.21316 | 0.548054 |
| UBB      | 13.0423 | 0.424283 |
| UBBP1    | 7.38706 | 0.517166 |
| UBBP4    | 7.38706 | 0.517166 |
| UBE2A    | 8.16001 | 0.674679 |
| UBE2C    | 6.02266 | 1.09449  |
| UBE2D2   | 7.58467 | 0.409171 |
| UBE2E1   | 10.7886 | 0.578355 |
| UBE2E2   | 7.73515 | 0.694065 |
| UBE2E3   | 9.62615 | 0.52413  |
| UBE2G1   | 9.07654 | 0.505776 |
| UBE2J1   | 10.4167 | 0.461474 |
| UBE2K    | 7.81236 | 0.481282 |
| UBE2L6   | 9.06829 | 0.651595 |
| UBE2M    | 7.88105 | 0.594416 |
| UBE2N    | 8.53791 | 0.627067 |
| UBE2Q2   | 8.43822 | 0.834602 |

|          |         |          |
|----------|---------|----------|
| UBE2Q2L  | 5.62329 | 0.472706 |
| UBE2QL1  | 7.89207 | 1.37209  |
| UBE2R2   | 7.51554 | 0.452045 |
| UBE2S    | 7.69844 | 0.841765 |
| UBE2T    | 5.88965 | 1.25502  |
| UBE2V2P3 | 5.58914 | 0.428778 |
| UBE4A    | 8.96283 | 0.605986 |
| UBFD1    | 6.15806 | 0.603767 |
| UBL3     | 7.42138 | 0.645097 |
| UBL4A    | 7.06529 | 0.496038 |
| UBL5     | 10.4033 | 0.4351   |
| UBL7     | 7.69971 | 0.586855 |
| UBL7-AS1 | 5.55021 | 0.58648  |
| UBLCP1   | 7.49652 | 0.769548 |
| UBP1     | 7.7079  | 0.55249  |
| UBQLN1   | 8.27108 | 0.439855 |
| UBQLN2   | 6.59235 | 0.60962  |
| UBR1     | 6.40704 | 0.560219 |
| UBR5     | 7.1573  | 0.689357 |
| UBR7     | 6.76884 | 0.75176  |
| UBTD2    | 5.8798  | 0.639015 |
| UBXN11   | 5.41247 | 0.418496 |
| UBXN2A   | 7.7806  | 0.451392 |
| UBXN2B   | 6.47633 | 0.513817 |
| UBXN4    | 8.07175 | 0.40083  |
| UBXN7    | 6.86291 | 0.754626 |
| UBXN8    | 6.90941 | 0.757703 |
| UCHL1    | 5.91605 | 1.60533  |
| UCHL3    | 8.49549 | 0.702096 |
| UCHL5    | 5.83252 | 0.438133 |
| UCK2     | 6.66102 | 0.622971 |
| UCN2     | 5.12422 | 0.432279 |
| UCP2     | 8.78468 | 0.777672 |
| UEVLD    | 5.23676 | 0.453147 |
| UFC1     | 10.7294 | 0.526412 |
| UFD1L    | 9.40915 | 0.417502 |
| UFL1     | 6.77558 | 0.52315  |
| UFM1     | 8.52831 | 0.687245 |
| UFSP1    | 5.78554 | 0.408668 |
| UFSP2    | 7.93056 | 0.496557 |
| UGCG     | 7.91221 | 0.70154  |
| UGDH     | 6.90526 | 0.720291 |
| UGP2     | 7.3429  | 0.48919  |
| UGT2B17  | 6.73441 | 2.17234  |
| UGT8     | 5.42109 | 1.2554   |
| UHMK1    | 7.58854 | 0.763296 |
| UHRF1    | 5.29119 | 1.07186  |

|              |         |          |
|--------------|---------|----------|
| UHRF2        | 8.72313 | 0.46945  |
| ULK3         | 7.4175  | 0.626686 |
| UMPS         | 5.44302 | 0.419939 |
| UNC13B       | 7.58436 | 0.671544 |
| UNC50        | 8.0538  | 0.444995 |
| UNC93B1      | 6.36638 | 0.501246 |
| UNG          | 6.3389  | 0.922862 |
| UPF2         | 6.91532 | 0.493571 |
| UPF3A        | 6.84369 | 0.592742 |
| UPF3B        | 5.67444 | 0.411018 |
| UPK3BL       | 7.28041 | 0.571769 |
| UPP1         | 5.32912 | 0.679348 |
| UPRT         | 5.95182 | 0.604296 |
| UQCR10       | 7.87351 | 0.427199 |
| UQCRB        | 8.42652 | 0.449019 |
| UQCRC1       | 9.06654 | 0.471462 |
| UQCRC2       | 7.51414 | 0.449401 |
| UQCRFS1      | 10.6233 | 0.487809 |
| UQCRH        | 11.5229 | 0.5162   |
| UQCRHL       | 11.5229 | 0.5162   |
| UQCRQ        | 11.0052 | 0.481577 |
| URB2         | 6.33025 | 0.53068  |
| URGCP        | 6.29907 | 0.436183 |
| URGCP-MRPS24 | 10.6221 | 0.674739 |
| UROD         | 6.56419 | 0.40529  |
| USE1         | 7.41573 | 0.570435 |
| USMG5        | 11.5449 | 0.409612 |
| USO1         | 9.84608 | 0.515443 |
| USP1         | 8.05102 | 0.802608 |
| USP10        | 7.04042 | 0.472616 |
| USP11        | 8.24688 | 0.590816 |
| USP12        | 5.06749 | 0.521645 |
| USP13        | 5.73455 | 0.485907 |
| USP14        | 8.37977 | 0.483822 |
| USP15        | 6.30357 | 0.42135  |
| USP16        | 8.76382 | 0.50303  |
| USP18        | 5.4086  | 1.07107  |
| USP20        | 6.06904 | 0.433669 |
| USP21        | 6.35228 | 0.503448 |
| USP24        | 5.92931 | 0.463815 |
| USP25        | 4.95384 | 0.484342 |
| USP28        | 6.1234  | 0.467183 |
| USP3         | 8.05314 | 0.539275 |
| USP30        | 5.57375 | 0.520809 |
| USP30-AS1    | 5.93908 | 0.477306 |
| USP32P2      | 7.18767 | 0.937451 |
| USP33        | 6.18883 | 0.438887 |



|            |         |          |
|------------|---------|----------|
| USP34      | 7.25972 | 0.451116 |
| USP37      | 4.94294 | 0.417295 |
| USP38      | 6.4926  | 0.588865 |
| USP40      | 5.97335 | 0.513023 |
| USP47      | 6.68532 | 0.447403 |
| USP48      | 7.04859 | 0.458403 |
| USP54      | 5.04592 | 0.449679 |
| USP6NL     | 5.30365 | 0.676015 |
| USP6NL-IT1 | 5.30365 | 0.676015 |
| USP8       | 7.20297 | 0.477245 |
| USPL1      | 5.72136 | 0.580723 |
| UTP14A     | 6.33641 | 0.554191 |
| UTP14C     | 7.06049 | 0.662687 |
| UTP15      | 4.97103 | 0.455852 |
| UTP18      | 6.09567 | 0.413137 |
| UTP20      | 6.17483 | 0.523532 |
| UTP23      | 5.98948 | 0.506356 |
| UTP3       | 8.11537 | 0.9957   |
| UTRN       | 6.78859 | 0.716666 |
| UVRAG      | 7.2225  | 0.70047  |
| UXS1       | 6.67799 | 0.694311 |
| UXT        | 10.4425 | 0.436384 |
| VAMP1      | 6.20441 | 0.572098 |
| VAMP2      | 6.66081 | 0.551169 |
| VAMP3      | 8.37113 | 0.517082 |
| VAMP4      | 6.74839 | 0.600416 |
| VAMP7      | 8.75306 | 0.823668 |
| VAMP8      | 8.91425 | 0.560803 |
| VARS       | 6.83264 | 0.562816 |
| VARS2      | 8.28125 | 0.583276 |
| VASP       | 7.06119 | 0.504418 |
| VAT1       | 7.49043 | 0.418918 |
| VAV1       | 7.31836 | 0.541914 |
| VAV3       | 4.86823 | 0.610926 |
| VBP1       | 8.89458 | 0.776919 |
| VCL        | 4.89994 | 0.44721  |
| VCP        | 9.52638 | 0.419499 |
| VCPKMT     | 6.97487 | 0.673797 |
| VCX2       | 5.53477 | 0.501089 |
| VCY        | 6.02824 | 0.624345 |
| VCY1B      | 6.02824 | 0.624345 |
| VDAC1      | 7.19686 | 0.460655 |
| VDAC2      | 10.0315 | 0.426153 |
| VDAC3      | 7.57345 | 0.535152 |
| VDR        | 6.49759 | 0.462329 |
| VEGFA      | 6.91177 | 0.620508 |
| VEGFB      | 5.95959 | 0.536652 |

|          |         |          |
|----------|---------|----------|
| VEZF1    | 6.75366 | 0.647818 |
| VEZT     | 5.89647 | 0.527396 |
| VGLL4    | 6.9554  | 0.434237 |
| VILL     | 6.80911 | 0.565246 |
| VIM      | 9.77558 | 1.02548  |
| VIMP     | 11.0237 | 0.597143 |
| VIPAS39  | 5.64475 | 0.405103 |
| VIPR1    | 5.62975 | 0.427419 |
| VKORC1   | 9.16329 | 0.619918 |
| VKORC1L1 | 5.17224 | 0.557918 |
| VMP1     | 7.38789 | 1.15071  |
| VNN2     | 5.19008 | 0.85236  |
| VOPP1    | 9.985   | 0.744346 |
| VPREB3   | 5.39793 | 1.75621  |
| VPS13A   | 5.33071 | 0.462794 |
| VPS13B   | 5.51871 | 0.475464 |
| VPS13C   | 6.17634 | 0.493244 |
| VPS25    | 7.63323 | 0.492493 |
| VPS28    | 8.90819 | 0.435084 |
| VPS35    | 7.03408 | 0.546459 |
| VPS36    | 5.07423 | 0.473959 |
| VPS37A   | 5.74471 | 0.756331 |
| VPS37B   | 7.9143  | 0.771189 |
| VPS4B    | 7.22198 | 0.879735 |
| VPS51    | 9.63405 | 0.745013 |
| VPS54    | 7.70636 | 0.438342 |
| VPS8     | 5.14024 | 0.432794 |
| VPS9D1   | 5.19224 | 0.430913 |
| VRK1     | 7.45005 | 0.93639  |
| VRK2     | 7.30026 | 0.616729 |
| VSTM2L   | 5.33778 | 0.421059 |
| VTA1     | 6.25513 | 0.581205 |
| VTI1B    | 7.01054 | 0.53844  |
| VWA5A    | 5.88798 | 0.774055 |
| VWA8     | 5.86011 | 0.549216 |
| VWCE     | 5.45214 | 0.501361 |
| WAC-AS1  | 7.48761 | 0.457185 |
| WAPAL    | 6.31105 | 0.41144  |
| WARS     | 9.24893 | 1.10939  |
| WARS2    | 4.90508 | 0.41004  |
| WASF2    | 6.50904 | 0.551091 |
| WBP1     | 7.91836 | 0.437136 |
| WBP11    | 6.9905  | 0.473464 |
| WBP1L    | 7.19971 | 0.505847 |
| WBP2     | 6.9334  | 0.665128 |
| WBP4     | 4.88733 | 0.493987 |
| WBP5     | 7.19884 | 1.39018  |

|         |         |          |
|---------|---------|----------|
| WDFY1   | 6.82562 | 0.657178 |
| WDFY2   | 5.2024  | 0.474444 |
| WDPCP   | 6.34365 | 0.425145 |
| WDR11   | 6.84207 | 0.773502 |
| WDR18   | 6.77719 | 0.546329 |
| WDR24   | 5.7196  | 0.449013 |
| WDR26   | 6.62352 | 0.471797 |
| WDR3    | 5.14852 | 0.547027 |
| WDR34   | 6.14604 | 0.707089 |
| WDR36   | 5.66414 | 0.655412 |
| WDR4    | 6.19497 | 0.464916 |
| WDR41   | 6.47647 | 0.402857 |
| WDR43   | 5.91444 | 0.744895 |
| WDR45   | 8.2354  | 0.550432 |
| WDR46   | 7.5345  | 0.437084 |
| WDR47   | 5.40352 | 0.565671 |
| WDR48   | 7.11098 | 0.40379  |
| WDR52   | 5.76116 | 0.727159 |
| WDR53   | 5.6145  | 0.475614 |
| WDR54   | 8.00968 | 0.57058  |
| WDR5B   | 4.80872 | 0.684339 |
| WDR61   | 7.19107 | 0.409103 |
| WDR64   | 5.67708 | 0.995109 |
| WDR70   | 6.99842 | 0.493562 |
| WDR73   | 7.16216 | 0.401332 |
| WDR75   | 6.75778 | 0.625433 |
| WDR82   | 8.4043  | 0.56739  |
| WDR83OS | 8.96655 | 0.405928 |
| WDR89   | 4.97231 | 0.426596 |
| WDR92   | 6.88365 | 0.462117 |
| WDSUB1  | 5.96802 | 0.679094 |
| WDYHV1  | 7.52721 | 0.756718 |
| WEE1    | 5.69844 | 1.02353  |
| WFDC12  | 5.68773 | 0.409597 |
| WFS1    | 7.34339 | 0.629517 |
| WHAMM   | 7.31503 | 0.613764 |
| WHSC1   | 5.74887 | 1.3235   |
| WIPF1   | 7.61325 | 0.596837 |
| WIP1    | 9.61285 | 0.6865   |
| WNT10A  | 5.4684  | 0.525751 |
| WNT10B  | 6.14286 | 0.626011 |
| WNT11   | 5.33159 | 0.545486 |
| WNT4    | 5.08093 | 0.41989  |
| WNT5A   | 6.26598 | 1.91881  |
| WNT5B   | 5.07635 | 0.441269 |
| WRB     | 8.63547 | 0.751997 |
| WRN     | 5.83437 | 0.560283 |

|                  |         |          |
|------------------|---------|----------|
| WSB1             | 6.17493 | 0.639451 |
| WSB2             | 6.28894 | 1.1086   |
| WWC3             | 7.07373 | 0.660108 |
| WWOX             | 5.65821 | 0.416664 |
| WWP1             | 6.08897 | 0.505229 |
| XAB2             | 5.45121 | 0.459528 |
| XAF1             | 6.69005 | 1.36481  |
| XAGE-4           | 6.19224 | 0.523914 |
| XAGE1B           | 5.89805 | 1.06669  |
| XAGE1E           | 5.89805 | 1.06669  |
| XAGE3            | 5.08637 | 0.70427  |
| XBP1             | 8.52675 | 0.439534 |
| XIAP             | 7.07011 | 0.538365 |
| XK               | 6.15391 | 1.47977  |
| XPA              | 6.81514 | 0.543408 |
| XPC              | 7.97669 | 0.402517 |
| XPO1             | 8.26908 | 0.63764  |
| XPO4             | 5.92944 | 0.460617 |
| XPO5             | 6.56222 | 0.424761 |
| XPO7             | 6.2536  | 0.490201 |
| XPOT             | 8.21809 | 0.799905 |
| XPR1             | 5.68988 | 0.600497 |
| XRCC2            | 6.31694 | 0.407888 |
| XRCC3            | 5.16092 | 0.41619  |
| XRCC4            | 6.056   | 0.715275 |
| XRCC6BP1         | 4.86894 | 0.433215 |
| XRN1             | 6.75174 | 0.591214 |
| XRN2             | 7.29182 | 0.435365 |
| XRR1             | 6.04965 | 0.416448 |
| XXbac-BPG32J3.18 | 5.13735 | 0.437848 |
| Y16709           | 11.6054 | 0.548575 |
| YAE1D1           | 6.19408 | 0.849685 |
| YBEY             | 6.65038 | 0.521488 |
| YBX1             | 8.97893 | 0.411912 |
| YBX3             | 5.79071 | 1.10934  |
| YDJC             | 6.40505 | 0.40475  |
| YEATS4           | 5.13865 | 0.665483 |
| YES1             | 5.4992  | 0.578031 |
| YIF1A            | 8.973   | 0.551242 |
| YIPF1            | 7.90635 | 0.611834 |
| YIPF3            | 8.02505 | 0.584046 |
| YIPF5            | 8.46085 | 0.578332 |
| YIPF6            | 6.96319 | 0.465171 |
| YKT6             | 6.97039 | 0.531406 |
| YLPM1            | 6.22699 | 0.405155 |
| YOD1             | 5.95074 | 0.848918 |
| YPEL2            | 5.33749 | 0.550021 |

|            |         |          |
|------------|---------|----------|
| YPEL3      | 7.19995 | 0.616148 |
| YPEL5      | 11.2605 | 0.744115 |
| YRDC       | 7.00329 | 0.429931 |
| YTHDC1     | 5.99855 | 0.455403 |
| YTHDC2     | 5.81586 | 0.612402 |
| YTHDF2     | 9.03088 | 0.410029 |
| YTHDF3     | 7.40501 | 0.72724  |
| YTHDF3-AS1 | 6.48065 | 0.401803 |
| YWHAB      | 9.37453 | 0.587858 |
| YWHAE      | 8.68085 | 0.715044 |
| YWHAG      | 9.43556 | 0.771813 |
| YWHAH      | 5.17244 | 0.417302 |
| YWHAQ      | 10.5352 | 0.425569 |
| YWHAZ      | 8.92864 | 0.500217 |
| YY1AP1     | 8.50763 | 0.550272 |
| ZADH2      | 5.22419 | 0.447774 |
| ZAK        | 4.8142  | 0.492364 |
| ZBED3      | 6.05927 | 0.732049 |
| ZBED5-AS1  | 7.62825 | 0.685178 |
| ZBED6      | 5.18608 | 0.630235 |
| ZBED6CL    | 5.77025 | 0.49653  |
| ZBP1       | 7.88443 | 0.684821 |
| ZBTB11     | 6.70897 | 0.506047 |
| ZBTB18     | 4.93428 | 0.796093 |
| ZBTB2      | 5.8174  | 0.696678 |
| ZBTB20     | 7.70495 | 0.971279 |
| ZBTB21     | 7.51466 | 0.694476 |
| ZBTB24     | 5.50062 | 0.510356 |
| ZBTB25     | 5.96081 | 0.612972 |
| ZBTB26     | 5.67643 | 0.734727 |
| ZBTB33     | 5.59831 | 0.433533 |
| ZBTB34     | 5.45681 | 0.62559  |
| ZBTB38     | 9.19773 | 0.623242 |
| ZBTB4      | 7.44503 | 0.509698 |
| ZBTB40     | 6.14782 | 0.536353 |
| ZBTB41     | 5.031   | 0.867305 |
| ZBTB43     | 6.65646 | 0.636371 |
| ZBTB44     | 6.20145 | 0.56708  |
| ZBTB48     | 5.92872 | 0.437235 |
| ZBTB5      | 6.97939 | 0.516958 |
| ZBTB8A     | 6.08553 | 1.55468  |
| ZBTB8OS    | 8.58509 | 0.494515 |
| ZBTB9      | 5.28472 | 0.484975 |
| ZC2HC1A    | 4.85088 | 0.447599 |
| ZC3H11A    | 7.74884 | 0.553931 |
| ZC3H12A    | 7.27017 | 1.0192   |
| ZC3H13     | 5.77893 | 0.426174 |

|          |         |          |
|----------|---------|----------|
| ZC3H14   | 5.59564 | 0.405264 |
| ZC3H6    | 4.94588 | 0.445618 |
| ZC3H7A   | 7.14053 | 0.530012 |
| ZC3H8    | 5.72618 | 0.503475 |
| ZC3HAV1  | 7.50531 | 0.49311  |
| ZC3HC1   | 6.75705 | 0.560065 |
| ZCCHC10  | 6.27842 | 0.597822 |
| ZCCHC11  | 5.95086 | 0.493254 |
| ZCCHC24  | 6.03934 | 0.590331 |
| ZCCHC6   | 7.06172 | 0.543601 |
| ZCCHC7   | 7.99453 | 0.667149 |
| ZCCHC8   | 6.36389 | 0.471807 |
| ZCCHC9   | 7.48899 | 0.520135 |
| ZDBF2    | 4.80716 | 0.724768 |
| ZDHHC11  | 5.77052 | 0.633644 |
| ZDHHC11B | 5.69169 | 0.808223 |
| ZDHHC12  | 6.65011 | 0.463955 |
| ZDHHC13  | 5.54051 | 0.526643 |
| ZDHHC14  | 5.39596 | 0.714674 |
| ZDHHC16  | 7.4926  | 0.501497 |
| ZDHHC17  | 6.2805  | 0.501371 |
| ZDHHC2   | 5.6417  | 0.569705 |
| ZDHHC20  | 6.48221 | 0.455071 |
| ZDHHC23  | 6.3069  | 0.812286 |
| ZDHHC6   | 7.88623 | 0.474546 |
| ZDHHC9   | 5.89333 | 0.436347 |
| ZEB1     | 5.43129 | 0.465939 |
| ZFAND1   | 8.28793 | 0.731825 |
| ZFAND2A  | 7.46723 | 0.616009 |
| ZFAND2B  | 6.84451 | 0.424819 |
| ZFAND6   | 8.77834 | 0.629522 |
| ZFAS1    | 8.58116 | 0.706561 |
| ZFAT     | 6.77552 | 0.53103  |
| ZFC3H1   | 6.05635 | 0.437941 |
| ZFP3     | 5.66457 | 0.851399 |
| ZFP36    | 10.7074 | 0.806254 |
| ZFP36L1  | 5.07509 | 0.500013 |
| ZFP36L2  | 7.82504 | 0.791968 |
| ZFP62    | 7.94704 | 0.70573  |
| ZFP90    | 5.18486 | 0.438072 |
| ZFP91    | 7.90873 | 0.464177 |
| ZFR      | 7.00262 | 0.549852 |
| ZFYVE21  | 5.58322 | 0.476313 |
| ZFYVE26  | 5.41256 | 0.469818 |
| ZGPAT    | 7.10246 | 0.442676 |
| ZHX1     | 5.70163 | 0.718348 |
| ZHX2     | 6.18175 | 0.544421 |

|          |         |          |
|----------|---------|----------|
| ZKSCAN1  | 6.45281 | 0.540247 |
| ZKSCAN4  | 5.31111 | 0.501601 |
| ZKSCAN8  | 5.3223  | 0.416009 |
| ZMAT1    | 4.8734  | 0.727267 |
| ZMAT2    | 8.31266 | 0.525818 |
| ZMAT3    | 6.64403 | 0.765421 |
| ZMIZ1    | 5.24702 | 0.517891 |
| ZMPSTE24 | 9.26456 | 0.525881 |
| ZMYM4    | 6.62629 | 0.501944 |
| ZMYM6NB  | 7.7141  | 0.727956 |
| ZMYND19  | 6.97531 | 0.53033  |
| ZMYND8   | 6.51181 | 0.438429 |
| ZNF10    | 5.16357 | 0.524701 |
| ZNF101   | 5.57873 | 0.620648 |
| ZNF106   | 6.86322 | 0.522753 |
| ZNF12    | 7.1714  | 0.612113 |
| ZNF121   | 8.21711 | 0.897224 |
| ZNF124   | 4.92019 | 0.552064 |
| ZNF131   | 5.97376 | 0.428311 |
| ZNF134   | 5.82365 | 0.538702 |
| ZNF136   | 7.22388 | 0.604705 |
| ZNF14    | 5.63452 | 0.575413 |
| ZNF140   | 6.0678  | 0.823614 |
| ZNF143   | 6.41353 | 0.560413 |
| ZNF146   | 8.12397 | 0.604341 |
| ZNF177   | 5.01762 | 0.930809 |
| ZNF184   | 6.07004 | 0.721755 |
| ZNF185   | 5.29888 | 0.694648 |
| ZNF189   | 7.76363 | 0.687294 |
| ZNF195   | 6.81357 | 0.777122 |
| ZNF20    | 5.22395 | 0.459492 |
| ZNF200   | 5.05966 | 0.597635 |
| ZNF202   | 5.08583 | 0.505905 |
| ZNF207   | 7.07622 | 0.441951 |
| ZNF211   | 6.5806  | 0.514519 |
| ZNF215   | 6.18139 | 0.638601 |
| ZNF217   | 6.83808 | 1.19807  |
| ZNF22    | 7.81289 | 0.660207 |
| ZNF222   | 5.27913 | 0.637499 |
| ZNF224   | 5.45983 | 0.457407 |
| ZNF227   | 5.43719 | 0.899149 |
| ZNF23    | 5.48482 | 0.645312 |
| ZNF232   | 6.13336 | 0.801598 |
| ZNF236   | 6.25693 | 0.474321 |
| ZNF24    | 6.52507 | 0.445999 |
| ZNF251   | 5.12203 | 0.448655 |
| ZNF26    | 5.2962  | 0.566217 |

|         |         |          |
|---------|---------|----------|
| ZNF260  | 4.90829 | 0.812842 |
| ZNF264  | 5.38253 | 0.422023 |
| ZNF266  | 7.65845 | 0.870387 |
| ZNF274  | 7.02408 | 0.603552 |
| ZNF275  | 9.19191 | 0.882044 |
| ZNF277  | 5.51499 | 0.453875 |
| ZNF280B | 4.84913 | 0.474569 |
| ZNF281  | 7.86457 | 0.755461 |
| ZNF286B | 5.48451 | 0.628599 |
| ZNF296  | 5.90312 | 0.53059  |
| ZNF302  | 6.42571 | 0.741336 |
| ZNF304  | 4.89091 | 0.606201 |
| ZNF317  | 5.91765 | 0.508    |
| ZNF318  | 5.64309 | 0.431734 |
| ZNF32   | 6.80716 | 0.67642  |
| ZNF320  | 6.0387  | 0.511681 |
| ZNF322  | 5.82974 | 0.710738 |
| ZNF324  | 6.18831 | 0.412926 |
| ZNF326  | 4.85121 | 0.404782 |
| ZNF329  | 5.34969 | 1.00497  |
| ZNF330  | 7.32544 | 0.469453 |
| ZNF331  | 7.04897 | 0.876585 |
| ZNF34   | 5.17972 | 0.402556 |
| ZNF35   | 5.7784  | 0.420756 |
| ZNF354A | 6.05364 | 0.569447 |
| ZNF367  | 5.51072 | 1.05686  |
| ZNF37A  | 5.72669 | 0.637281 |
| ZNF37BP | 5.11235 | 0.504601 |
| ZNF395  | 6.19806 | 0.607279 |
| ZNF398  | 6.08766 | 0.425489 |
| ZNF410  | 7.39087 | 0.541975 |
| ZNF419  | 6.59701 | 0.404435 |
| ZNF420  | 5.45706 | 0.753054 |
| ZNF426  | 5.56137 | 0.765934 |
| ZNF430  | 5.1063  | 0.522269 |
| ZNF432  | 6.74356 | 0.955921 |
| ZNF45   | 5.64485 | 0.608603 |
| ZNF451  | 6.01526 | 0.420644 |
| ZNF510  | 5.36918 | 0.411361 |
| ZNF512  | 7.0526  | 0.604134 |
| ZNF512B | 6.16532 | 0.505857 |
| ZNF514  | 5.26641 | 0.798977 |
| ZNF518A | 5.73081 | 0.446849 |
| ZNF526  | 4.9245  | 0.437042 |
| ZNF532  | 6.29888 | 0.81771  |
| ZNF548  | 5.7291  | 0.420574 |
| ZNF550  | 5.33255 | 0.521238 |



|               |         |          |
|---------------|---------|----------|
| ZNF558        | 7.02263 | 1.04475  |
| ZNF559        | 6.52618 | 1.15287  |
| ZNF559-ZNF177 | 5.01762 | 0.930809 |
| ZNF561        | 5.58187 | 0.665398 |
| ZNF562        | 5.42262 | 0.429142 |
| ZNF564        | 5.58485 | 0.533198 |
| ZNF565        | 5.72822 | 0.650847 |
| ZNF574        | 6.18337 | 0.439479 |
| ZNF580        | 7.56068 | 0.576997 |
| ZNF581        | 7.07843 | 0.709071 |
| ZNF587        | 6.00647 | 0.452913 |
| ZNF587B       | 6.44368 | 0.613639 |
| ZNF593        | 7.84771 | 0.599266 |
| ZNF600        | 6.50961 | 1.23709  |
| ZNF615        | 5.37784 | 0.578015 |
| ZNF622        | 7.86067 | 0.567377 |
| ZNF625        | 4.80744 | 0.406378 |
| ZNF625-ZNF20  | 5.42103 | 0.495959 |
| ZNF630        | 5.293   | 0.505922 |
| ZNF638        | 7.44098 | 0.515157 |
| ZNF638-IT1    | 7.19746 | 0.628489 |
| ZNF639        | 6.27328 | 0.612148 |
| ZNF644        | 5.95444 | 0.697317 |
| ZNF652        | 7.2074  | 0.59357  |
| ZNF655        | 7.35691 | 0.516177 |
| ZNF665        | 7.11138 | 0.427779 |
| ZNF669        | 5.68348 | 0.41574  |
| ZNF689        | 5.76134 | 0.477501 |
| ZNF691        | 5.46762 | 0.444498 |
| ZNF692        | 7.15102 | 0.55488  |
| ZNF697        | 5.01791 | 0.54835  |
| ZNF700        | 6.86051 | 0.649694 |
| ZNF706        | 8.71219 | 0.609789 |
| ZNF711        | 5.78697 | 1.20744  |
| ZNF721        | 7.65176 | 0.421383 |
| ZNF764        | 5.11915 | 0.494226 |
| ZNF765        | 5.13228 | 0.40444  |
| ZNF766        | 6.9005  | 0.572459 |
| ZNF767P       | 6.34694 | 0.532048 |
| ZNF770        | 6.19324 | 0.450339 |
| ZNF776        | 6.81118 | 0.763007 |
| ZNF786        | 5.21849 | 0.445729 |
| ZNF791        | 8.87412 | 0.621822 |
| ZNF800        | 6.4062  | 0.435692 |
| ZNF804A       | 5.19475 | 1.10643  |
| ZNF805        | 5.40008 | 0.485012 |
| ZNF827        | 6.47931 | 0.586745 |

|         |         |          |
|---------|---------|----------|
| ZNF830  | 6.97804 | 0.482733 |
| ZNF84   | 5.59687 | 0.575104 |
| ZNF844  | 5.3085  | 0.483387 |
| ZNF862  | 6.03389 | 0.473199 |
| ZNFX1   | 6.68674 | 0.552443 |
| ZNHIT1  | 8.30381 | 0.47928  |
| ZNHIT3  | 7.50965 | 0.581703 |
| ZNHIT6  | 5.0327  | 0.429739 |
| ZNRF3   | 4.84717 | 0.692537 |
| ZP3     | 6.10724 | 0.772488 |
| ZPR1    | 7.18842 | 0.52562  |
| ZRANB1  | 6.33898 | 0.423083 |
| ZRANB2  | 8.36358 | 0.551517 |
| ZRSR1   | 5.06115 | 0.417653 |
| ZRSR2   | 7.00416 | 0.456443 |
| ZSCAN16 | 5.80424 | 0.627072 |
| ZSCAN18 | 5.49683 | 0.66152  |
| ZSCAN21 | 6.97419 | 0.594368 |
| ZSCAN26 | 5.82009 | 0.525315 |
| ZSCAN29 | 6.84841 | 0.515627 |
| ZSWIM6  | 7.95713 | 0.926783 |
| ZUFSP   | 6.18671 | 0.729159 |
| ZW10    | 7.0272  | 0.56122  |
| ZWILCH  | 6.50183 | 0.967975 |
| ZWINT   | 6.86796 | 1.60078  |
| ZYG11B  | 6.51443 | 0.587287 |
| ZYX     | 6.09952 | 0.463719 |
| ZZZ3    | 6.53467 | 0.466755 |

**Supplementary Table 3.** Cis-CNV regulated genes among informative genes that were included in the construction of M3CN.

| CNV nodes        | cis correlation |
|------------------|-----------------|
| cnv_AACS         | 0.405309        |
| cnv_AAGAB        | 0.486504        |
| cnv_AARS         | 0.464855        |
| cnv_AASDHPPT     | 0.653572        |
| cnv_ABCB10       | 0.581071        |
| cnv_ABCC10       | 0.468254        |
| cnv_ABCC5        | 0.433533        |
| cnv_ABCD3        | 0.448692        |
| cnv_ABCF1        | 0.508879        |
| cnv_ABHD12       | 0.304139        |
| cnv_ABHD14A-ACY1 | 0.30642         |
| cnv_ABHD17A      | 0.347014        |
| cnv_ABHD17B      | 0.278979        |
| cnv_ABHD17C      | 0.394307        |
| cnv_ABHD2        | 0.351613        |
| cnv_ABHD3        | 0.450606        |
| cnv_ABRACL       | 0.366501        |
| cnv_ABT1         | 0.301709        |
| cnv_ACAD8        | 0.481047        |
| cnv_ACAD9        | 0.304929        |
| cnv_ACADM        | 0.272964        |
| cnv_ACADVL       | 0.494441        |
| cnv_ACAT2        | 0.349605        |
| cnv_ACBD3        | 0.645312        |
| cnv_ACBD6        | 0.640252        |
| cnv_ACCS         | 0.298495        |
| cnv_ACD          | 0.295316        |
| cnv_ACIN1        | 0.300399        |
| cnv_ACLY         | 0.397286        |
| cnv_ACOT1        | 0.472335        |
| cnv_ACOT13       | 0.376645        |
| cnv_ACOT2        | 0.470682        |
| cnv_ACOT9        | 0.273689        |
| cnv_ACP2         | 0.467623        |
| cnv_ACP6         | 0.562524        |
| cnv_ACTG1P4      | 0.378793        |
| cnv_ACTL6A       | 0.265642        |
| cnv_ACTR10       | 0.5203          |
| cnv_ACTR2        | 0.325967        |
| cnv_ACTR3        | 0.347733        |
| cnv_ACTR3B       | 0.44066         |
| cnv_ACTR5        | 0.422306        |

|              |          |
|--------------|----------|
| cnv_ACTR6    | 0.288353 |
| cnv_ACYP1    | 0.344065 |
| cnv_ADA      | 0.349232 |
| cnv_ADAM10   | 0.37409  |
| cnv_ADAM17   | 0.228357 |
| cnv_ADAM19   | 0.288286 |
| cnv_ADAM28   | 0.375772 |
| cnv_ADAMTS15 | 0.346596 |
| cnv_ADAR     | 0.554624 |
| cnv_ADAT1    | 0.481875 |
| cnv_ADAT2    | 0.388267 |
| cnv_ADCY7    | 0.465385 |
| cnv_ADIPOR1  | 0.515931 |
| cnv_ADPGK    | 0.543499 |
| cnv_ADRM1    | 0.388445 |
| cnv_ADSS     | 0.576519 |
| cnv_AEN      | 0.457536 |
| cnv_AFF4     | 0.432651 |
| cnv_AFTPH    | 0.282892 |
| cnv_AGA      | 0.274674 |
| cnv_AFG1     | 0.282371 |
| cnv_AGK      | 0.424871 |
| cnv_AGL      | 0.413617 |
| cnv_AGO2     | 0.441181 |
| cnv_AGO3     | 0.335839 |
| cnv_AGPAT1   | 0.389216 |
| cnv_AGPAT5   | 0.35451  |
| cnv_AGTPBP1  | 0.502839 |
| cnv_AHCYL1   | 0.558452 |
| cnv_AHI1     | 0.560647 |
| cnv_AIDA     | 0.546842 |
| cnv_AIFM1    | 0.469096 |
| cnv_AIG1     | 0.591005 |
| cnv_AIMP2    | 0.498398 |
| cnv_AIP      | 0.474771 |
| cnv_AK3      | 0.514163 |
| cnv_AK6      | 0.428984 |
| cnv_AKAP11   | 0.555876 |
| cnv_AKAP13   | 0.380256 |
| cnv_AKAP2    | 0.484705 |
| cnv_AKAP9    | 0.448229 |
| cnv_AKIRIN1  | 0.284807 |
| cnv_AKIRIN2  | 0.401915 |
| cnv_AKR1A1   | 0.42493  |
| cnv_AKR1B1   | 0.214743 |
| cnv_AKR7A2   | 0.412195 |
| cnv_AKT1S1   | 0.330677 |

|                     |          |
|---------------------|----------|
| cnv_AKTIP           | 0.432998 |
| cnv_ALAS1           | 0.426586 |
| cnv_ALDH16A1        | 0.298584 |
| cnv_ALDH6A1         | 0.500476 |
| cnv_ALDH9A1         | 0.550599 |
| cnv_ALDOA           | 0.50371  |
| cnv_ALG11           | 0.309505 |
| cnv_ALG13           | 0.538801 |
| cnv_ALG14           | 0.426565 |
| cnv_ALG2            | 0.350611 |
| cnv_ALG3            | 0.471373 |
| cnv_ALG5            | 0.517556 |
| cnv_ALG6            | 0.271196 |
| cnv_ALG9            | 0.532258 |
| cnv_ALKBH3          | 0.490069 |
| cnv_ALKBH5          | 0.379945 |
| cnv_ALKBH8          | 0.610078 |
| cnv_AMD1            | 0.459699 |
| cnv_AMMECR1         | 0.399989 |
| cnv_AMPD2           | 0.473225 |
| cnv_AMY1A           | 0.333749 |
| cnv_AMY1B           | 0.333749 |
| cnv_AMY2A           | 0.333749 |
| cnv_AMY2B           | 0.378793 |
| cnv_AMZ2            | 0.427645 |
| cnv_AMZ2P1          | 0.3774   |
| cnv_ANAPC15         | 0.461484 |
| cnv_ANAPC4          | 0.376365 |
| cnv_ANAPC5          | 0.492902 |
| cnv_ANG             | 0.221263 |
| cnv_ANGEL2          | 0.570567 |
| cnv_ANKHD1-EIF4EBP3 | 0.462344 |
| cnv_ANKIB1          | 0.475869 |
| cnv_ANKRA2          | 0.34253  |
| cnv_ANKRD12         | 0.396824 |
| cnv_ANKRD13C        | 0.445858 |
| cnv_ANKRD17         | 0.404129 |
| cnv_ANKRD27         | 0.227059 |
| cnv_ANKRD36BP2      | 0.255014 |
| cnv_ANKRD46         | 0.446084 |
| cnv_ANKRD49         | 0.603328 |
| cnv_ANKS1A          | 0.341102 |
| cnv_ANP32A          | 0.507631 |
| cnv_ANP32B          | 0.469854 |
| cnv_ANP32E          | 0.727473 |
| cnv_ANTXR2          | 0.216197 |
| cnv_ANXA11          | 0.203579 |

|                 |          |
|-----------------|----------|
| cnv_ANXA2R      | 0.360475 |
| cnv_ANXA5       | 0.3049   |
| cnv_ANXA7       | 0.369753 |
| cnv_AP1G1       | 0.511954 |
| cnv_AP1M1       | 0.31323  |
| cnv_AP1S1       | 0.457525 |
| cnv_AP2B1       | 0.267871 |
| cnv_AP2M1       | 0.389855 |
| cnv_AP2S1       | 0.30415  |
| cnv_AP3M1       | 0.182804 |
| cnv_AP5M1       | 0.560423 |
| cnv_APBA3       | 0.282188 |
| cnv_APBB1IP     | 0.224066 |
| cnv_APBB3       | 0.429259 |
| cnv_APC         | 0.551786 |
| cnv_APH1A       | 0.683731 |
| cnv_API5        | 0.410824 |
| cnv_APITD1-CORT | 0.345588 |
| cnv_APMAP       | 0.493418 |
| cnv_APOBEC3B    | 0.190053 |
| cnv_APOBEC3C    | 0.370332 |
| cnv_APOBEC3G    | 0.349744 |
| cnv_APOL6       | 0.231585 |
| cnv_APPL1       | 0.399038 |
| cnv_APPL2       | 0.282005 |
| cnv_AQR         | 0.47707  |
| cnv_ARCN1       | 0.540558 |
| cnv_ARF3        | 0.402742 |
| cnv_ARF4        | 0.358719 |
| cnv_ARF5        | 0.470993 |
| cnv_ARF6        | 0.362496 |
| cnv_ARFGAP3     | 0.490142 |
| cnv_ARFGEF1     | 0.516551 |
| cnv_ARFIP1      | 0.228285 |
| cnv_ARFIP2      | 0.445477 |
| cnv_ARGLU1      | 0.725251 |
| cnv_ARHGAP17    | 0.312113 |
| cnv_ARHGAP18    | 0.381854 |
| cnv_ARHGAP21    | 0.390021 |
| cnv_ARHGAP30    | 0.418658 |
| cnv_ARHGAP4     | 0.376273 |
| cnv_ARHGDIB     | 0.296622 |
| cnv_ARHGEF2     | 0.579049 |
| cnv_ARHGEF3     | 0.241577 |
| cnv_ARHGEF6     | 0.395561 |
| cnv_ARID2       | 0.253307 |
| cnv_ARID4A      | 0.38919  |

|                    |          |
|--------------------|----------|
| cnv_ARIH1          | 0.555851 |
| cnv_ARL1           | 0.55449  |
| cnv_ARL14EP        | 0.367956 |
| cnv_ARL2           | 0.455453 |
| cnv_ARL2BP         | 0.457977 |
| cnv_ARL5A          | 0.364702 |
| cnv_ARL5B          | 0.26312  |
| cnv_ARL6IP1        | 0.462064 |
| cnv_ARL6IP6        | 0.215659 |
| cnv_ARL8A          | 0.406191 |
| cnv_ARL8B          | 0.385673 |
| cnv_ARMC1          | 0.511708 |
| cnv_ARMC10         | 0.566215 |
| cnv_ARMC8          | 0.359516 |
| cnv_ARMCX3         | 0.34887  |
| cnv_ARMCX5         | 0.400676 |
| cnv_ARMCX5-GPRASP2 | 0.246432 |
| cnv_ARPC1A         | 0.521622 |
| cnv_ARPC3          | 0.413602 |
| cnv_ARPC5          | 0.575343 |
| cnv_ARPC5L         | 0.374803 |
| cnv_ARPP19         | 0.497713 |
| cnv_ARRDC3         | 0.27343  |
| cnv_ASAH1          | 0.597046 |
| cnv_ASB16-AS1      | 0.353189 |
| cnv_ASB8           | 0.392433 |
| cnv_ASCC2          | 0.389062 |
| cnv_ASCC3          | 0.4888   |
| cnv_ASH1L          | 0.481618 |
| cnv_ASH1L-AS1      | 0.496994 |
| cnv_ASH2L          | 0.502969 |
| cnv_AS_L           | 0.362304 |
| cnv_ASNA1          | 0.394943 |
| cnv_ASNS           | 0.37684  |
| cnv_ASXL1          | 0.434525 |
| cnv_ATF1           | 0.274612 |
| cnv_ATF2           | 0.313197 |
| cnv_ATF6           | 0.398463 |
| cnv_ATF7IP2        | 0.2225   |
| cnv_ATG12          | 0.496483 |
| cnv_ATG14          | 0.515615 |
| cnv_ATG2B          | 0.486442 |
| cnv_ATG3           | 0.411119 |
| cnv_ATG4A          | 0.44413  |
| cnv_ATM            | 0.447034 |
| cnv_ATOX1          | 0.249684 |
| cnv_ATP10B         | 0.287214 |

|                     |          |
|---------------------|----------|
| cnv_ATP10D          | 0.52826  |
| cnv_ATP11B          | 0.4774   |
| cnv_ATP11C          | 0.434268 |
| cnv_ATP13A1         | 0.315413 |
| cnv_ATP13A3         | 0.387799 |
| cnv_ATP2B4          | 0.360492 |
| cnv_ATP2C1          | 0.270936 |
| cnv_ATP5D           | 0.397006 |
| cnv_ATP5G1          | 0.40924  |
| cnv_ATP5I           | 0.408998 |
| cnv_ATP5J           | 0.44534  |
| cnv_ATP5L           | 0.641732 |
| cnv_ATP6AP1         | 0.544612 |
| cnv_ATP6AP2         | 0.215467 |
| cnv_ATP6V0A1        | 0.220693 |
| cnv_ATP6V0B         | 0.496212 |
| cnv_ATP6V0C         | 0.437786 |
| cnv_ATP6V0D1        | 0.522573 |
| cnv_ATP6V0E1        | 0.512692 |
| cnv_ATP6V1A         | 0.445755 |
| cnv_ATP6V1B2        | 0.471956 |
| cnv_ATP6V1C1        | 0.595015 |
| cnv_ATP6V1E1        | 0.465121 |
| cnv_ATP6V1E2        | 0.254241 |
| cnv_ATP6V1F         | 0.653541 |
| cnv_ATP6V1G1        | 0.390482 |
| cnv_ATP6V1G2-DDX39B | 0.376443 |
| cnv_ATP8A2          | 0.316263 |
| cnv_ATP8B2          | 0.607331 |
| cnv_ATPAF1          | 0.506486 |
| cnv_ATRAID          | 0.377755 |
| cnv_ATXN10          | 0.366215 |
| cnv_ATXN1L          | 0.591556 |
| cnv_ATXN2           | 0.387399 |
| cnv_AUH             | 0.568279 |
| cnv_AUP1            | 0.292747 |
| cnv_AURKAPS1        | 0.68623  |
| cnv_AVEN            | 0.596711 |
| cnv_AZIN1           | 0.557545 |
| cnv_B4GALT4         | 0.339269 |
| cnv_B4GALT5         | 0.340755 |
| cnv_BABAM1          | 0.543188 |
| cnv_BAG1            | 0.53513  |
| cnv_BAG4            | 0.507985 |
| cnv_BAG5            | 0.407979 |
| cnv_BAK1            | 0.37797  |
| cnv_BANF1           | 0.345846 |



|                   |          |
|-------------------|----------|
| cnv_BANK1         | 0.307555 |
| cnv_BARD1         | 0.222059 |
| cnv_BBS2          | 0.35108  |
| cnv_BBS4          | 0.338813 |
| cnv_BCAP31        | 0.456244 |
| cnv_BCAR3         | 0.318084 |
| cnv_BCAS2         | 0.596524 |
| cnv_BCAS3         | 0.337439 |
| cnv_BCKDHB        | 0.558297 |
| cnv_BCKDK         | 0.480135 |
| cnv_BCL10         | 0.436003 |
| cnv_BCL2          | 0.396792 |
| cnv_BCL2L2-PABPN1 | 0.433371 |
| cnv_BCL7B         | 0.521703 |
| cnv_BCL7C         | 0.35946  |
| cnv_BCLAF1        | 0.463521 |
| cnv_BCR           | 0.339351 |
| cnv_BDP1          | 0.324818 |
| cnv_BET1L         | 0.404683 |
| cnv_BEX2          | 0.244539 |
| cnv_BICD1         | 0.320944 |
| cnv_BICD2         | 0.27562  |
| cnv_BIRC2         | 0.787944 |
| cnv_BLCAP         | 0.409316 |
| cnv_BLNK          | 0.294264 |
| cnv_BLOC1S1       | 0.372886 |
| cnv_BLOC1S4       | 0.261505 |
| cnv_BLOC1S5       | 0.421691 |
| cnv_BLOC1S6       | 0.421542 |
| cnv_BNIP2         | 0.383847 |
| cnv_BNIP3         | 0.254107 |
| cnv_BNIP3L        | 0.633795 |
| cnv_BOD1          | 0.552383 |
| cnv_BOD1L1        | 0.352562 |
| cnv_BOLA1         | 0.576298 |
| cnv_BOLA2         | 0.465602 |
| cnv_BORA          | 0.425961 |
| cnv_BPGM          | 0.353885 |
| cnv_BPNT1         | 0.673442 |
| cnv_BRAF          | 0.389462 |
| cnv_BRAT1         | 0.512766 |
| cnv_BRCA1         | 0.392828 |
| cnv_BRCC3         | 0.471427 |
| cnv_BRD2          | 0.463743 |
| cnv_BRI3BP        | 0.206726 |
| cnv_BRIX1         | 0.46991  |
| cnv_BRMS1         | 0.569377 |

|               |          |
|---------------|----------|
| cnv_BRMS1L    | 0.423011 |
| cnv_BROX      | 0.636173 |
| cnv_BSDC1     | 0.511394 |
| cnv_BST2      | 0.365823 |
| cnv_BTBD1     | 0.43002  |
| cnv_BTBD10    | 0.405673 |
| cnv_BTK       | 0.333931 |
| cnv_BTLA      | 0.388635 |
| cnv_BTN3A1    | 0.28304  |
| cnv_BUD13     | 0.621263 |
| cnv_BZW2      | 0.425343 |
| cnv_C11orf1   | 0.512309 |
| cnv_C11orf24  | 0.298153 |
| cnv_C11orf54  | 0.405693 |
| cnv_C11orf57  | 0.665381 |
| cnv_C11orf68  | 0.382576 |
| cnv_C11orf71  | 0.416787 |
| cnv_C12orf29  | 0.317934 |
| cnv_C12orf4   | 0.354277 |
| cnv_C12orf57  | 0.322273 |
| cnv_C14orf166 | 0.576291 |
| cnv_C14orf2   | 0.470957 |
| cnv_C14orf28  | 0.326285 |
| cnv_C15orf39  | 0.395081 |
| cnv_C15orf57  | 0.388374 |
| cnv_C15orf61  | 0.539556 |
| cnv_C16orf54  | 0.289994 |
| cnv_C16orf72  | 0.3775   |
| cnv_C16orf91  | 0.374417 |
| cnv_C17orf49  | 0.407024 |
| cnv_C17orf75  | 0.23681  |
| cnv_C19orf12  | 0.643554 |
| cnv_C19orf24  | 0.449798 |
| cnv_C19orf43  | 0.639866 |
| cnv_C19orf48  | 0.344671 |
| cnv_C19orf53  | 0.600281 |
| cnv_C19orf60  | 0.325116 |
| cnv_C19orf66  | 0.261986 |
| cnv_C19orf70  | 0.472542 |
| cnv_C1D       | 0.24388  |
| cnv_C1GALT1   | 0.356298 |
| cnv_C1GALT1C1 | 0.47729  |
| cnv_C1orf106  | 0.500951 |
| cnv_C1orf122  | 0.428655 |
| cnv_C1orf131  | 0.522087 |
| cnv_C1orf174  | 0.379989 |
| cnv_C1orf21   | 0.426549 |

|                    |          |
|--------------------|----------|
| cnv_C1orf27        | 0.547351 |
| cnv_C1orf43        | 0.611358 |
| cnv_C1orf52        | 0.61147  |
| cnv_C1orf53        | 0.358831 |
| cnv_C1QTNF3-AMACR  | 0.43209  |
| cnv_C20orf24       | 0.466394 |
| cnv_C21orf33       | 0.423965 |
| cnv_C22orf39       | 0.481621 |
| cnv_C2CD2          | 0.25707  |
| cnv_C2CD5          | 0.341795 |
| cnv_C2orf69        | 0.297806 |
| cnv_C3orf38        | 0.342831 |
| cnv_C4A            | 0.295311 |
| cnv_C4B            | 0.295311 |
| cnv_C4orf3         | 0.389597 |
| cnv_C5orf22        | 0.429981 |
| cnv_C5orf24        | 0.453336 |
| cnv_C5orf30        | 0.359403 |
| cnv_C5orf56        | 0.434961 |
| cnv_C6orf1         | 0.380518 |
| cnv_C6orf120       | 0.497216 |
| cnv_C6orf136       | 0.450984 |
| cnv_C6orf226       | 0.241938 |
| cnv_C6orf62        | 0.428794 |
| cnv_C7orf31        | 0.454985 |
| cnv_C7orf55-LUC7L2 | 0.474026 |
| cnv_C8orf44-SGK3   | 0.380972 |
| cnv_C8orf59        | 0.487514 |
| cnv_C8orf76        | 0.563352 |
| cnv_C8orf82        | 0.371885 |
| cnv_C9orf78        | 0.454667 |
| cnv_CAAP1          | 0.422182 |
| cnv_CABLES1        | 0.254861 |
| cnv_CACYBP         | 0.709723 |
| cnv_CADM1          | 0.309565 |
| cnv_CALU           | 0.461197 |
| cnv_CAMK2D         | 0.278759 |
| cnv_CAMLG          | 0.541606 |
| cnv_CAMSAP2        | 0.374398 |
| cnv_CAND1          | 0.3888   |
| cnv_CAP1           | 0.430058 |
| cnv_CAPN2          | 0.401361 |
| cnv_CAPN7          | 0.283175 |
| cnv_CAPRIN1        | 0.583206 |
| cnv_CAPZA2         | 0.49911  |
| cnv_CARD16         | 0.314882 |
| cnv_CASC3          | 0.362371 |

|              |          |
|--------------|----------|
| cnv_CASP1    | 0.427293 |
| cnv_CASP4    | 0.537979 |
| cnv_CASP7    | 0.278277 |
| cnv_CAST     | 0.555607 |
| cnv_CAT      | 0.259006 |
| cnv_CBFA2T2  | 0.34506  |
| cnv_CFBF     | 0.465768 |
| cnv_CBL      | 0.408746 |
| cnv_CBLL1    | 0.294345 |
| cnv_CBR1     | 0.283024 |
| cnv_CBX1     | 0.425063 |
| cnv_CBX3     | 0.444465 |
| cnv_CBX5     | 0.274532 |
| cnv_CBX7     | 0.315027 |
| cnv_CCDC102A | 0.336454 |
| cnv_CCDC107  | 0.418437 |
| cnv_CCDC115  | 0.207203 |
| cnv_CCDC117  | 0.345491 |
| cnv_CCDC12   | 0.441487 |
| cnv_CCDC125  | 0.427082 |
| cnv_CCDC126  | 0.336977 |
| cnv_CCDC167  | 0.305124 |
| cnv_CCDC25   | 0.547793 |
| cnv_CCDC28A  | 0.536968 |
| cnv_CCDC50   | 0.289314 |
| cnv_CCDC51   | 0.285772 |
| cnv_CCDC59   | 0.482773 |
| cnv_CCDC6    | 0.327137 |
| cnv_CCDC69   | 0.364861 |
| cnv_CCDC84   | 0.404193 |
| cnv_CCDC86   | 0.136227 |
| cnv_CCM2     | 0.453213 |
| cnv_CCNC     | 0.618138 |
| cnv_CCND1    | 0.332941 |
| cnv_CCNDBP1  | 0.682487 |
| cnv_CCNE1    | 0.435974 |
| cnv_CCNE2    | 0.285106 |
| cnv_CCNG1    | 0.493846 |
| cnv_CCNH     | 0.426406 |
| cnv_CCNI     | 0.597624 |
| cnv_CCNT1    | 0.332576 |
| cnv_CCNYL1   | 0.348628 |
| cnv_CCP110   | 0.534336 |
| cnv_CCPG1    | 0.295178 |
| cnv_CCT3     | 0.622443 |
| cnv_CCT5     | 0.33544  |
| cnv_CCT6A    | 0.415161 |

|              |          |
|--------------|----------|
| cnv_CCT6P1   | 0.405785 |
| cnv_CCT6P3   | 0.442842 |
| cnv_CCT8     | 0.435807 |
| cnv_CCZ1B    | 0.557163 |
| cnv_CD164    | 0.525486 |
| cnv_CD27     | 0.276572 |
| cnv_CD274    | 0.324336 |
| cnv_CD320    | 0.367046 |
| cnv_CD44     | 0.296733 |
| cnv_CD46     | 0.487203 |
| cnv_CD53     | 0.425025 |
| cnv_CD55     | 0.467198 |
| cnv_CD63     | 0.38145  |
| cnv_CDC23    | 0.289329 |
| cnv_CDC25B   | 0.224303 |
| cnv_CDC26    | 0.441106 |
| cnv_CDC27    | 0.347604 |
| cnv_CDC37L1  | 0.48483  |
| cnv_CDC40    | 0.423962 |
| cnv_CDC42    | 0.317016 |
| cnv_CDC42SE1 | 0.600326 |
| cnv_CDC42SE2 | 0.421823 |
| cnv_CDC73    | 0.605294 |
| cnv_CDCA7L   | 0.395829 |
| cnv_CDIPT    | 0.595937 |
| cnv_CDK2     | 0.274922 |
| cnv_CDK2AP1  | 0.2708   |
| cnv_CDK4     | 0.351556 |
| cnv_CDK5     | 0.365047 |
| cnv_CDK5RAP3 | 0.38947  |
| cnv_CDK7     | 0.396077 |
| cnv_CDK8     | 0.36008  |
| cnv_CDKN1B   | 0.479395 |
| cnv_CDKN2AIP | 0.46401  |
| cnv_CDRT4    | 0.308099 |
| cnv_CDV3     | 0.402652 |
| cnv_CDYL     | 0.366881 |
| cnv_CEBPB    | 0.312252 |
| cnv_CEBPZOS  | 0.374786 |
| cnv_CECR1    | 0.351044 |
| cnv_CENPB    | 0.346848 |
| cnv_CENPC    | 0.280614 |
| cnv_CENPJ    | 0.358981 |
| cnv_CENPM    | 0.257993 |
| cnv_CEP120   | 0.357135 |
| cnv_CEP170   | 0.512345 |
| cnv_CEP192   | 0.488529 |

|             |           |
|-------------|-----------|
| cnv_CEP290  | 0.315141  |
| cnv_CEP350  | 0.531447  |
| cnv_CEP57   | 0.580877  |
| cnv_CEP72   | 0.394335  |
| cnv_CEP85L  | 0.422272  |
| cnv_CEPT1   | 0.47931   |
| cnv_CERK    | 0.311858  |
| cnv_CERS2   | 0.739964  |
| cnv_CETN2   | 0.484827  |
| cnv_CFL2    | 0.32885   |
| cnv_CGGBP1  | 0.278709  |
| cnv_CGRRF1  | 0.558313  |
| cnv_CHCHD2  | 0.474085  |
| cnv_CHCHD3  | 0.528392  |
| cnv_CHCHD4  | 0.423287  |
| cnv_CHCHD7  | 0.383448  |
| cnv_CHD1    | 0.389463  |
| cnv_CHD1L   | 0.692034  |
| cnv_CHD2    | 0.333817  |
| cnv_CHD8    | 0.539641  |
| cnv_CHD9    | 0.50353   |
| cnv_CHEK1   | 0.383855  |
| cnv_CHIC2   | 0.262112  |
| cnv_CHKA    | 0.352134  |
| cnv_CHMP1B  | 0.518359  |
| cnv_CHMP2B  | 0.2745    |
| cnv_CHMP4A  | 0.586072  |
| cnv_CHMP4C  | 0.319666  |
| cnv_CHMP5   | 0.336836  |
| cnv_CHMP7   | 0.498365  |
| cnv_CHORDC1 | 0.426272  |
| cnv_CHP1    | 0.504599  |
| cnv_CHPF    | 0.300688  |
| cnv_CHPF2   | 0.0877621 |
| cnv_CHRAC1  | 0.51262   |
| cnv_CHRNB1  | 0.321683  |
| cnv_CHST12  | 0.421222  |
| cnv_CHST15  | 0.327164  |
| cnv_CHSY3   | 0.411708  |
| cnv_CHTOP   | 0.480923  |
| cnv_CHURC1  | 0.516284  |
| cnv_CIB1    | 0.316067  |
| cnv_CIPC    | 0.473552  |
| cnv_CITED2  | 0.437509  |
| cnv_CKAP4   | 0.424659  |
| cnv_CKAP5   | 0.338555  |
| cnv_CKLF    | 0.482982  |

|                |          |
|----------------|----------|
| cnv_CKLF-CMTM1 | 0.478744 |
| cnv_CKMT2-AS1  | 0.307932 |
| cnv_CKS1B      | 0.520835 |
| cnv_CKS2       | 0.378475 |
| cnv_CLASP2     | 0.269425 |
| cnv_CLCC1      | 0.630459 |
| cnv_CLCN3      | 0.365334 |
| cnv_CLDND1     | 0.28851  |
| cnv_CLIC1      | 0.444077 |
| cnv_CLIC4      | 0.266996 |
| cnv_CLINT1     | 0.347494 |
| cnv_CLK2       | 0.526105 |
| cnv_CLK4       | 0.448596 |
| cnv_CLMN       | 0.485753 |
| cnv_CLN3       | 0.329864 |
| cnv_CLN5       | 0.567015 |
| cnv_CLNS1A     | 0.674269 |
| cnv_CLOCK      | 0.394111 |
| cnv_CLPP       | 0.458407 |
| cnv_CLPTM1     | 0.319028 |
| cnv_CLPX       | 0.470421 |
| cnv_CLSTN1     | 0.312566 |
| cnv_CMC1       | 0.314836 |
| cnv_CMC2       | 0.51096  |
| cnv_CMC4       | 0.643322 |
| cnv_CMSS1      | 0.417864 |
| cnv_CMTR1      | 0.38913  |
| cnv_CNEP1R1    | 0.265879 |
| cnv_CNOT10     | 0.336094 |
| cnv_CNOT11     | 0.376184 |
| cnv_CNOT6L     | 0.449088 |
| cnv_CNOT7      | 0.633039 |
| cnv_CNOT8      | 0.333645 |
| cnv_CNPPD1     | 0.318051 |
| cnv_CNPY3      | 0.521233 |
| cnv_COA4       | 0.471029 |
| cnv_COA6       | 0.607776 |
| cnv_COG2       | 0.677992 |
| cnv_COG3       | 0.582871 |
| cnv_COG5       | 0.331699 |
| cnv_COG7       | 0.513684 |
| cnv_COIL       | 0.345076 |
| cnv_COL24A1    | 0.316158 |
| cnv_COLCA2     | 0.309228 |
| cnv_COLGALT1   | 0.361206 |
| cnv_COMMMD10   | 0.475785 |
| cnv_COMMMD2    | 0.356159 |

|                |          |
|----------------|----------|
| cnv_COMMD9     | 0.425542 |
| cnv_COPA       | 0.696179 |
| cnv_COPS2      | 0.562307 |
| cnv_COPS3      | 0.35432  |
| cnv_COPS5      | 0.454797 |
| cnv_COPS6      | 0.660388 |
| cnv_COPS7A     | 0.407912 |
| cnv_COQ10A     | 0.338358 |
| cnv_COQ2       | 0.186655 |
| cnv_COQ4       | 0.474996 |
| cnv_COQ5       | 0.362888 |
| cnv_COX14      | 0.334555 |
| cnv_COX15      | 0.237541 |
| cnv_COX16      | 0.536461 |
| cnv_COX17      | 0.322661 |
| cnv_COX20      | 0.516372 |
| cnv_COX5A      | 0.630498 |
| cnv_COX6B1     | 0.367997 |
| cnv_COX6C      | 0.465747 |
| cnv_COX7A2     | 0.45931  |
| cnv_COX7C      | 0.684745 |
| cnv_COX8A      | 0.360574 |
| cnv_CPEB4      | 0.417632 |
| cnv_CPNE1      | 0.437439 |
| cnv_CPNE3      | 0.44135  |
| cnv_CPOX       | 0.278528 |
| cnv_CPT1A      | 0.3082   |
| cnv_CPT2       | 0.46477  |
| cnv_CRBN       | 0.434841 |
| cnv_CREB1      | 0.265665 |
| cnv_CREB3      | 0.371766 |
| cnv_CREB3L4    | 0.602312 |
| cnv_CREBL2     | 0.491234 |
| cnv_CREBRF     | 0.313786 |
| cnv_CREBZF     | 0.483706 |
| cnv_CREG1      | 0.281462 |
| cnv_CRIPAK     | 0.467673 |
| cnv_CRIPT      | 0.342205 |
| cnv_CRK        | 0.470919 |
| cnv_CRKL       | 0.168264 |
| cnv_CRTC3      | 0.338026 |
| cnv_CRYL1      | 0.388508 |
| cnv_CRYZ       | 0.302713 |
| cnv_CRYZL1     | 0.504651 |
| cnv_CSDE1      | 0.691141 |
| cnv_CSE1L      | 0.414471 |
| cnv_CSGALNACT1 | 0.504485 |



|                |          |
|----------------|----------|
| cnv_CSGALNACT2 | 0.244885 |
| cnv_CSK        | 0.299533 |
| cnv_CSNK1A1    | 0.526158 |
| cnv_CSNK1G3    | 0.364134 |
| cnv_CSNK2A1    | 0.399017 |
| cnv_CSNK2A2    | 0.410144 |
| cnv_CSPP1      | 0.447205 |
| cnv_CSRP1      | 0.384015 |
| cnv_CSTF2T     | 0.246915 |
| cnv_CSTF3      | 0.501337 |
| cnv_CTBS       | 0.485083 |
| cnv_CTDNEP1    | 0.418992 |
| cnv_CTDSP2     | 0.321146 |
| cnv_CTDSP2L2   | 0.404307 |
| cnv_CTH        | 0.300575 |
| cnv_CTNNB1     | 0.250513 |
| cnv_CTNS       | 0.304639 |
| cnv_CTR9       | 0.291681 |
| cnv_CTSA       | 0.337601 |
| cnv_CTSB       | 0.456027 |
| cnv_CTSC       | 0.483637 |
| cnv_CTSK       | 0.50118  |
| cnv_CTSO       | 0.450225 |
| cnv_CTSZ       | 0.233077 |
| cnv_CUL4B      | 0.471838 |
| cnv_CUL5       | 0.591445 |
| cnv_CUTA       | 0.316639 |
| cnv_CUTC       | 0.265279 |
| cnv_CUX1       | 0.35954  |
| cnv_CWC15      | 0.698793 |
| cnv_CWC22      | 0.282735 |
| cnv_CWC27      | 0.42402  |
| cnv_CXorf40A   | 0.629072 |
| cnv_CXorf40B   | 0.654354 |
| cnv_CXXC1      | 0.337309 |
| cnv_CXXC4      | 0.209305 |
| cnv_CXXC5      | 0.305934 |
| cnv_CYB561A3   | 0.342973 |
| cnv_CYB5A      | 0.268113 |
| cnv_CYB5D1     | 0.374124 |
| cnv_CYB5R3     | 0.380257 |
| cnv_CYB5R4     | 0.304444 |
| cnv_CYBB       | 0.18628  |
| cnv_CYC1       | 0.424255 |
| cnv_CYCS       | 0.36572  |
| cnv_CYLD       | 0.439513 |
| cnv_CYP20A1    | 0.212453 |

|             |          |
|-------------|----------|
| cnv_CYP2R1  | 0.296133 |
| cnv_CYP51A1 | 0.362263 |
| cnv_CYSTM1  | 0.424719 |
| cnv_CYTH1   | 0.247322 |
| cnv_DAAM1   | 0.328376 |
| cnv_DAD1    | 0.341895 |
| cnv_DALRD3  | 0.332367 |
| cnv_DAPP1   | 0.418306 |
| cnv_DARS2   | 0.705846 |
| cnv_DBF4    | 0.513345 |
| cnv_DBNL    | 0.341988 |
| cnv_DCAF10  | 0.401379 |
| cnv_DCAF12  | 0.294535 |
| cnv_DCAF13  | 0.578669 |
| cnv_DCAF16  | 0.308848 |
| cnv_DCP1A   | 0.277964 |
| cnv_DCP2    | 0.38936  |
| cnv_DCPS    | 0.480983 |
| cnv_DCTD    | 0.509109 |
| cnv_DCTN1   | 0.284457 |
| cnv_DCTN3   | 0.582602 |
| cnv_DCTN4   | 0.507864 |
| cnv_DCTN6   | 0.618866 |
| cnv_DCUN1D1 | 0.407471 |
| cnv_DCUN1D2 | 0.319974 |
| cnv_DCUN1D4 | 0.245039 |
| cnv_DCUN1D5 | 0.6187   |
| cnv_DDB2    | 0.296604 |
| cnv_DDHD1   | 0.416097 |
| cnv_DDHD2   | 0.546226 |
| cnv_DDIAS   | 0.366889 |
| cnv_DDIT3   | 0.344536 |
| cnv_DDOST   | 0.487995 |
| cnv_DDRGK1  | 0.358362 |
| cnv_DDX17   | 0.329447 |
| cnv_DDX18   | 0.421801 |
| cnv_DDX24   | 0.586987 |
| cnv_DDX39A  | 0.446099 |
| cnv_DDX39B  | 0.376443 |
| cnv_DDX41   | 0.38904  |
| cnv_DDX46   | 0.355936 |
| cnv_DDX47   | 0.453298 |
| cnv_DDX5    | 0.190937 |
| cnv_DDX50   | 0.33061  |
| cnv_DDX58   | 0.45918  |
| cnv_DDX59   | 0.557655 |
| cnv_DECR1   | 0.379855 |

|                   |          |
|-------------------|----------|
| cnv_DEDD          | 0.591718 |
| cnv_DEDD2         | 0.425356 |
| cnv_DEF6          | 0.403183 |
| cnv_DEGS1         | 0.55345  |
| cnv_DENND1B       | 0.428172 |
| cnv_DENND2D       | 0.409141 |
| cnv_DENND4A       | 0.55189  |
| cnv_DENND4B       | 0.481827 |
| cnv_DENND5B       | 0.338057 |
| cnv_DENND6A       | 0.373728 |
| cnv_DEPTOR        | 0.296988 |
| cnv_DERA          | 0.42886  |
| cnv_DERL1         | 0.422329 |
| cnv_DERL2         | 0.564199 |
| cnv_DET1          | 0.321635 |
| cnv_DEXI          | 0.356611 |
| cnv_DFFB          | 0.420713 |
| cnv_DGAT1         | 0.337231 |
| cnv_DGCR6         | 0.426306 |
| cnv_DGKA          | 0.243682 |
| cnv_DGKQ          | 0.352269 |
| cnv_DHCR7         | 0.258217 |
| cnv_DHPS          | 0.541672 |
| cnv_DHRS13        | 0.358919 |
| cnv_DHRS4         | 0.421343 |
| cnv_DHRS4L2       | 0.416551 |
| cnv_DHTKD1        | 0.314602 |
| cnv_DHX16         | 0.54113  |
| cnv_DHX29         | 0.445761 |
| cnv_DHX33         | 0.377811 |
| cnv_DHX40         | 0.452639 |
| cnv_DHX9          | 0.480576 |
| cnv_DIABLO        | 0.307515 |
| cnv_DIEXF         | 0.429075 |
| cnv_DIMT1         | 0.420131 |
| cnv_DIS3          | 0.532867 |
| cnv_DIS3L         | 0.524829 |
| cnv_DKC1          | 0.444263 |
| cnv_DKFZP586I1420 | 0.330636 |
| cnv_DLAT          | 0.523907 |
| cnv_DLD           | 0.444269 |
| cnv_DLEU1         | 0.37138  |
| cnv_DLG1          | 0.334746 |
| cnv_DLST          | 0.52287  |
| cnv_DMAP1         | 0.424751 |
| cnv_DMRT2         | 0.242439 |
| cnv_DMTF1         | 0.402398 |

|              |          |
|--------------|----------|
| cnv_DMXL1    | 0.408633 |
| cnv_DMXL2    | 0.324619 |
| cnv_DNAAF2   | 0.24005  |
| cnv_DNAJA1   | 0.420285 |
| cnv_DNAJA2   | 0.380011 |
| cnv_DNAJA3   | 0.437082 |
| cnv_DNAJB14  | 0.299986 |
| cnv_DNAJB4   | 0.419416 |
| cnv_DNAJB6   | 0.265393 |
| cnv_DNAJC14  | 0.36503  |
| cnv_DNAJC15  | 0.526888 |
| cnv_DNAJC17  | 0.324452 |
| cnv_DNAJC18  | 0.540199 |
| cnv_DNAJC19  | 0.441024 |
| cnv_DNAJC24  | 0.395026 |
| cnv_DNAJC3   | 0.454425 |
| cnv_DNASE1L1 | 0.554814 |
| cnv_DNASE2   | 0.448684 |
| cnv_DNTTIP1  | 0.494514 |
| cnv_DNTTIP2  | 0.419681 |
| cnv_DOCK11   | 0.320254 |
| cnv_DOCK7    | 0.380859 |
| cnv_DOCK8    | 0.356726 |
| cnv_DOK3     | 0.383861 |
| cnv_DOLK     | 0.454682 |
| cnv_DONSON   | 0.376455 |
| cnv_DPAGT1   | 0.43277  |
| cnv_DPF2     | 0.551392 |
| cnv_DPH3     | 0.389037 |
| cnv_DPM1     | 0.368396 |
| cnv_DPM2     | 0.413063 |
| cnv_DPM3     | 0.540182 |
| cnv_DPP3     | 0.40934  |
| cnv_DPP8     | 0.462703 |
| cnv_DPY19L4  | 0.415545 |
| cnv_DRAM2    | 0.588872 |
| cnv_DRAP1    | 0.281191 |
| cnv_DRG1     | 0.393981 |
| cnv_DROSHA   | 0.527934 |
| cnv_DSN1     | 0.382996 |
| cnv_DTL      | 0.436419 |
| cnv_DTNBP1   | 0.464287 |
| cnv_DTWD1    | 0.424868 |
| cnv_DTX3L    | 0.33411  |
| cnv_DUS4L    | 0.470849 |
| cnv_DUSP11   | 0.281223 |
| cnv_DUSP12   | 0.688586 |

|                    |          |
|--------------------|----------|
| cnv_DUSP14         | 0.245912 |
| cnv_DUSP22         | 0.323775 |
| cnv_DUSP23         | 0.3494   |
| cnv_DUSP28         | 0.354721 |
| cnv_DUSP7          | 0.300115 |
| cnv_DUT            | 0.285434 |
| cnv_DXO            | 0.374724 |
| cnv_DYNC1LI1       | 0.459837 |
| cnv_DYNLT1         | 0.560864 |
| cnv_DYNLT3         | 0.261809 |
| cnv_DYRK4          | 0.431173 |
| cnv_DYX1C1-CCPG1   | 0.321277 |
| cnv_DZIP3          | 0.393795 |
| cnv_E2F3           | 0.344121 |
| cnv_EAF1           | 0.401101 |
| cnv_EBAG9          | 0.422903 |
| cnv_EBPL           | 0.448649 |
| cnv_ECD            | 0.319662 |
| cnv_ECHDC1         | 0.494891 |
| cnv_ECI2           | 0.360201 |
| cnv_ECSIT          | 0.506725 |
| cnv_EDEM2          | 0.315681 |
| cnv_EDEM3          | 0.604456 |
| cnv_EED            | 0.534727 |
| cnv_EEF1E1         | 0.4456   |
| cnv_EEF1E1-BLOC1S5 | 0.376508 |
| cnv_EEF2           | 0.481303 |
| cnv_EEF2K          | 0.326789 |
| cnv_EFCAB7         | 0.285239 |
| cnv_EFNA4          | 0.285977 |
| cnv_EFR3A          | 0.416638 |
| cnv_EGLN1          | 0.677046 |
| cnv_EHD3           | 0.216484 |
| cnv_EI24           | 0.483517 |
| cnv_EID1           | 0.518664 |
| cnv{EIF1AD         | 0.369366 |
| cnv{EIF1AX         | 0.356381 |
| cnv{EIF1B          | 0.263392 |
| cnv{EIF2A          | 0.460324 |
| cnv{EIF2AK1        | 0.590642 |
| cnv{EIF2AK4        | 0.347899 |
| cnv{EIF2B2         | 0.400705 |
| cnv{EIF2D          | 0.446865 |
| cnv{EIF2S1         | 0.469471 |
| cnv{EIF3B          | 0.587512 |
| cnv{EIF3F          | 0.585945 |
| cnv{EIF3G          | 0.587023 |

|                  |          |
|------------------|----------|
| cnv	EIF3J        | 0.509233 |
| cnv	EIF3J-AS1    | 0.316842 |
| cnv	EIF3M        | 0.487112 |
| cnv	EIF4E3       | 0.234303 |
| cnv	EIF4G1       | 0.380027 |
| cnv	EIF5         | 0.529968 |
| cnv	EIF5A        | 0.299447 |
| cnv	EIF6         | 0.39491  |
| cnv	ELF1         | 0.505164 |
| cnv	ELF2         | 0.353032 |
| cnv	ELF4         | 0.380691 |
| cnv	ELFN1-AS1    | 0.311244 |
| cnv	ELL2         | 0.487732 |
| cnv	ELMO1        | 0.437127 |
| cnv	ELOVL7       | 0.464334 |
| cnv	ELP3         | 0.443974 |
| cnv	ELP4         | 0.451526 |
| cnv	ELP5         | 0.482153 |
| cnv	EMB          | 0.293367 |
| cnv	EMC2         | 0.43891  |
| cnv	EMC6         | 0.509633 |
| cnv	EMC7         | 0.490066 |
| cnv	EMC8         | 0.658096 |
| cnv	EMC9         | 0.49806  |
| cnv	EMD          | 0.500009 |
| cnv	EME1         | 0.344211 |
| cnv	EMG1         | 0.427865 |
| cnv	EML6         | 0.26212  |
| cnv	ENDOG        | 0.418428 |
| cnv	ENKD1        | 0.314315 |
| cnv	ENOSF1       | 0.298123 |
| cnv	ENSA         | 0.697636 |
| cnv	ENTPD4       | 0.658345 |
| cnv	ENY2         | 0.542499 |
| cnv	EP300        | 0.326687 |
| cnv	EPB41L4A     | 0.654249 |
| cnv	EPB41L4A-AS1 | 0.601895 |
| cnv	EPC1         | 0.363379 |
| cnv	EPHX2        | 0.264087 |
| cnv	EPM2AIP1     | 0.279816 |
| cnv	EPRS         | 0.697429 |
| cnv	EPS15        | 0.464711 |
| cnv	EPST11       | 0.364201 |
| cnv	ERAP2        | 0.338474 |
| cnv	ERCC1        | 0.53784  |
| cnv	ERCC3        | 0.286555 |
| cnv	ERCC4        | 0.308829 |

|              |          |
|--------------|----------|
| cnv_ERCC5    | 0.645413 |
| cnv_ERGIC1   | 0.344984 |
| cnv_ERGIC2   | 0.371087 |
| cnv_ERH      | 0.559348 |
| cnv_ERI3     | 0.376068 |
| cnv_ERLIN2   | 0.54174  |
| cnv_ERMARD   | 0.615533 |
| cnv_ERMP1    | 0.305822 |
| cnv_ERN1     | 0.264806 |
| cnv_ERP29    | 0.41491  |
| cnv_ESF1     | 0.223416 |
| cnv_ESYT1    | 0.433362 |
| cnv_ESYT2    | 0.363668 |
| cnv ETF1     | 0.497772 |
| cnv ETFA     | 0.387636 |
| cnv ETHE1    | 0.32412  |
| cnv ETNK1    | 0.339004 |
| cnv ETV3     | 0.351953 |
| cnv ETV6     | 0.301149 |
| cnv EWSR1    | 0.199687 |
| cnv_EXD2     | 0.593864 |
| cnv_EXO1     | 0.455998 |
| cnv_EXOC1    | 0.196601 |
| cnv_EXOC2    | 0.492585 |
| cnv_EXOC5    | 0.396364 |
| cnv_EXOC8    | 0.440456 |
| cnv_EXOSC3   | 0.350261 |
| cnv_EXOSC6   | 0.38001  |
| cnv_EXOSC8   | 0.390095 |
| cnv_EXT1     | 0.401029 |
| cnv_EXT2     | 0.430049 |
| cnv_EZH2     | 0.337071 |
| cnv_EZR      | 0.44271  |
| cnv_F12      | 0.34206  |
| cnv_F2R      | 0.442246 |
| cnv_F8       | 0.472105 |
| cnv_F8A1     | 0.603871 |
| cnv_FADD     | 0.298669 |
| cnv_FAF2     | 0.38814  |
| cnv_FAM102B  | 0.291383 |
| cnv_FAM103A1 | 0.341367 |
| cnv_FAM104A  | 0.410827 |
| cnv_FAM111A  | 0.387712 |
| cnv_FAM114A1 | 0.293331 |
| cnv_FAM118B  | 0.618686 |
| cnv_FAM120B  | 0.592729 |
| cnv_FAM122A  | 0.288248 |

|              |          |
|--------------|----------|
| cnv_FAM122B  | 0.599574 |
| cnv_FAM126B  | 0.234794 |
| cnv_FAM127A  | 0.385752 |
| cnv_FAM127B  | 0.353641 |
| cnv_FAM129A  | 0.330427 |
| cnv_FAM134A  | 0.332829 |
| cnv_FAM134C  | 0.350345 |
| cnv_FAM13B   | 0.408435 |
| cnv_FAM149A  | 0.398072 |
| cnv_FAM160A2 | 0.458224 |
| cnv_FAM162A  | 0.366167 |
| cnv_FAM174A  | 0.447402 |
| cnv_FAM175B  | 0.308989 |
| cnv_FAM177A1 | 0.2429   |
| cnv_FAM179B  | 0.450463 |
| cnv_FAM193A  | 0.403    |
| cnv_FAM199X  | 0.499042 |
| cnv_FAM206A  | 0.385988 |
| cnv_FAM20B   | 0.535695 |
| cnv_FAM210A  | 0.416098 |
| cnv_FAM210B  | 0.179275 |
| cnv_FAM213A  | 0.308104 |
| cnv_FAM214A  | 0.586568 |
| cnv_FAM217B  | 0.225894 |
| cnv_FAM219A  | 0.379372 |
| cnv_FAM220A  | 0.401123 |
| cnv_FAM221A  | 0.436186 |
| cnv_FAM228B  | 0.220848 |
| cnv_FAM229B  | 0.351268 |
| cnv_FAM32A   | 0.483596 |
| cnv_FAM35A   | 0.145906 |
| cnv_FAM46C   | 0.333409 |
| cnv_FAM50A   | 0.601062 |
| cnv_FAM53C   | 0.524788 |
| cnv_FAM58A   | 0.47125  |
| cnv_FAM63B   | 0.422913 |
| cnv_FAM65A   | 0.308375 |
| cnv_FAM72A   | 0.413282 |
| cnv_FAM72C   | 0.481001 |
| cnv_FAM72D   | 0.45419  |
| cnv_FAM76B   | 0.549169 |
| cnv_FAM8A1   | 0.41776  |
| cnv_FAM96A   | 0.505197 |
| cnv_FAM96B   | 0.571592 |
| cnv_FAM98A   | 0.345615 |
| cnv_FAM98B   | 0.281671 |
| cnv_FAM98C   | 0.417244 |



|              |          |
|--------------|----------|
| cnv_FANCF    | 0.31182  |
| cnv_FANCG    | 0.441439 |
| cnv_FAR1     | 0.324418 |
| cnv_FARSA    | 0.379686 |
| cnv_FASTKD3  | 0.347189 |
| cnv_FASTKD5  | 0.394074 |
| cnv_FBL      | 0.436988 |
| cnv_FBXL20   | 0.281514 |
| cnv_FBXL4    | 0.450986 |
| cnv_FBXL5    | 0.471911 |
| cnv_FBXO11   | 0.210773 |
| cnv_FBXO16   | 0.61637  |
| cnv_FBXO22   | 0.667395 |
| cnv_FBXO25   | 0.519175 |
| cnv_FBXO28   | 0.567881 |
| cnv_FBXO30   | 0.405416 |
| cnv_FBXO33   | 0.458176 |
| cnv_FBXO34   | 0.412185 |
| cnv_FBXO38   | 0.422351 |
| cnv_FBXO45   | 0.458673 |
| cnv_FBXO46   | 0.319426 |
| cnv_FBXO6    | 0.275601 |
| cnv_FBXO7    | 0.468768 |
| cnv_FBXW11   | 0.37633  |
| cnv_FCF1     | 0.526471 |
| cnv_FCHSD2   | 0.529269 |
| cnv_FDFT1    | 0.535057 |
| cnv_FDPS     | 0.672072 |
| cnv_FDX1     | 0.581798 |
| cnv_FDXACB1  | 0.614009 |
| cnv_FECH     | 0.363481 |
| cnv_FEM1B    | 0.407735 |
| cnv_FER      | 0.398008 |
| cnv_FERMT3   | 0.427386 |
| cnv_FGFR1OP2 | 0.357839 |
| cnv_FH       | 0.73244  |
| cnv_FHOD1    | 0.2519   |
| cnv_FIBP     | 0.420797 |
| cnv_FICD     | 0.383141 |
| cnv_FIG4     | 0.41718  |
| cnv_FIP1L1   | 0.270462 |
| cnv_FIS1     | 0.507235 |
| cnv_FKBP11   | 0.396827 |
| cnv_FKBP1A   | 0.338275 |
| cnv_FKTN     | 0.298727 |
| cnv_FLAD1    | 0.658665 |
| cnv_FLI1     | 0.471316 |

|                |          |
|----------------|----------|
| cnv_FLJ20021   | 0.297108 |
| cnv_FLJ32255   | 0.272707 |
| cnv_FLNA       | 0.295577 |
| cnv_FLVCR1     | 0.465176 |
| cnv_FLVCR1-AS1 | 0.35061  |
| cnv_FMR1       | 0.492763 |
| cnv_FNBP4      | 0.467905 |
| cnv_FNDC3A     | 0.507072 |
| cnv_FNDC3B     | 0.405236 |
| cnv_FNIP1      | 0.264563 |
| cnv_FNTA       | 0.462281 |
| cnv_FOS        | 0.403904 |
| cnv_FOXO1      | 0.382215 |
| cnv_FOXO3      | 0.492646 |
| cnv_FOXRED1    | 0.462024 |
| cnv_FTO        | 0.577153 |
| cnv_FTSJ3      | 0.337792 |
| cnv_FUBP1      | 0.368299 |
| cnv_FUBP3      | 0.328768 |
| cnv_FUCA2      | 0.457038 |
| cnv_FUK        | 0.452203 |
| cnv_FUOM       | 0.269186 |
| cnv_FUS        | 0.471991 |
| cnv_FUT8       | 0.33719  |
| cnv_FUT8-AS1   | 0.340235 |
| cnv_FXN        | 0.284447 |
| cnv_FYN        | 0.239953 |
| cnv_FYTTD1     | 0.498313 |
| cnv_G3BP1      | 0.283154 |
| cnv_G3BP2      | 0.357599 |
| cnv_G6PC3      | 0.33316  |
| cnv_G6PD       | 0.419686 |
| cnv_GAB1       | 0.375232 |
| cnv_GABARAP    | 0.577856 |
| cnv_GABARAPL1  | 0.27566  |
| cnv_GABARAPL2  | 0.626559 |
| cnv_GABPA      | 0.379917 |
| cnv_GABPB1-AS1 | 0.465734 |
| cnv_GABPB2     | 0.460321 |
| cnv_GALC       | 0.366936 |
| cnv_GALK2      | 0.301096 |
| cnv_GALNT1     | 0.395365 |
| cnv_GALNT2     | 0.401154 |
| cnv_GANAB      | 0.269406 |
| cnv_GAPVD1     | 0.427138 |
| cnv_GARS       | 0.475068 |
| cnv_GART       | 0.540294 |

|              |          |
|--------------|----------|
| cnv_GAS5     | 0.371431 |
| cnv_GATAD1   | 0.351075 |
| cnv_GATAD2B  | 0.374502 |
| cnv_GATSL2   | 0.268627 |
| cnv_GBA      | 0.543051 |
| cnv_GBAP1    | 0.584785 |
| cnv_GBAS     | 0.316155 |
| cnv_GBE1     | 0.2731   |
| cnv_GBF1     | 0.257456 |
| cnv_GBP1     | 0.226459 |
| cnv_GBP3     | 0.31823  |
| cnv_GBP5     | 0.324144 |
| cnv_GCDH     | 0.40253  |
| cnv_GCH1     | 0.344906 |
| cnv_GCLC     | 0.343867 |
| cnv_GCOM1    | 0.552698 |
| cnv_GCSH     | 0.395839 |
| cnv_GDAP2    | 0.486093 |
| cnv_GDE1     | 0.395334 |
| cnv_GDI1     | 0.644814 |
| cnv_GDI2     | 0.323588 |
| cnv_GFM1     | 0.41398  |
| cnv_GFM2     | 0.372692 |
| cnv_GFPT1    | 0.327926 |
| cnv_GGCT     | 0.466868 |
| cnv_GGH      | 0.246544 |
| cnv_GGPS1    | 0.558541 |
| cnv_GHITM    | 0.312958 |
| cnv_GID4     | 0.409601 |
| cnv_GIMAP2   | 0.369208 |
| cnv_GINM1    | 0.531295 |
| cnv_GINS1    | 0.203945 |
| cnv_GKAP1    | 0.257567 |
| cnv_GLA      | 0.432891 |
| cnv_GLB1     | 0.408391 |
| cnv_GLCCI1   | 0.480505 |
| cnv_GLE1     | 0.443232 |
| cnv_GLG1     | 0.609258 |
| cnv_GLIPR1   | 0.221199 |
| cnv_GLIS3    | 0.274968 |
| cnv_GLOD4    | 0.367121 |
| cnv_GLRX     | 0.474558 |
| cnv_GLRX2    | 0.514137 |
| cnv_GLRX5    | 0.46612  |
| cnv_GLTP     | 0.318701 |
| cnv_GLTSCR1L | 0.395867 |
| cnv_GLTSCR2  | 0.415896 |

|               |          |
|---------------|----------|
| cnv_GM2A      | 0.379649 |
| cnv_GMCL1     | 0.23661  |
| cnv_GMDS      | 0.50756  |
| cnv_GMFB      | 0.477045 |
| cnv_GMPPA     | 0.366544 |
| cnv_GMPR2     | 0.497871 |
| cnv_GNA13     | 0.320644 |
| cnv_GNAI3     | 0.387959 |
| cnv_GNB1      | 0.445662 |
| cnv_GNB2      | 0.388578 |
| cnv_GNB5      | 0.347464 |
| cnv_GNE       | 0.276213 |
| cnv_GNG5      | 0.632868 |
| cnv_GNL3      | 0.396787 |
| cnv_GNPAT     | 0.684482 |
| cnv_GNPAT1    | 0.260171 |
| cnv_GNPTG     | 0.392705 |
| cnv_GNS       | 0.366103 |
| cnv_GOLGA1    | 0.347779 |
| cnv_GOLGA4    | 0.385942 |
| cnv_GOLGA5    | 0.457813 |
| cnv_GOLGA6L4  | 0.345397 |
| cnv_GOLGA6L5P | 0.342593 |
| cnv_GOLGA6L9  | 0.367506 |
| cnv_GOLGA7    | 0.565629 |
| cnv_GOLGA8CP  | 0.423001 |
| cnv_GOLGA8DP  | 0.388852 |
| cnv_GOLGA8EP  | 0.407955 |
| cnv_GOLGA8F   | 0.423924 |
| cnv_GOLGA8G   | 0.41609  |
| cnv_GOLGA8N   | 0.427042 |
| cnv_GOLGB1    | 0.270197 |
| cnv_GOLIM4    | 0.296525 |
| cnv_GOLPH3    | 0.253677 |
| cnv_GOLPH3L   | 0.428861 |
| cnv_GOLT1B    | 0.454886 |
| cnv_GON4L     | 0.497702 |
| cnv_GOPC      | 0.501381 |
| cnv_GORAB     | 0.517358 |
| cnv_GORASP2   | 0.415857 |
| cnv_GOT2      | 0.537561 |
| cnv_GPAA1     | 0.388884 |
| cnv_GPALPP1   | 0.520152 |
| cnv_GPANK1    | 0.494549 |
| cnv_GPATCH1   | 0.345983 |
| cnv_GPBP1     | 0.505944 |
| cnv_GPBP1L1   | 0.57902  |

|             |          |
|-------------|----------|
| cnv_GPD1L   | 0.266548 |
| cnv_GPHN    | 0.397989 |
| cnv_GPI     | 0.329598 |
| cnv_GPN3    | 0.346172 |
| cnv_GPR155  | 0.20835  |
| cnv_GPR89A  | 0.31795  |
| cnv_GPR89B  | 0.734981 |
| cnv_GPRASP1 | 0.248542 |
| cnv_GPRASP2 | 0.253026 |
| cnv_GPS2    | 0.520868 |
| cnv_GPT2    | 0.25281  |
| cnv_GRHPR   | 0.623467 |
| cnv_GRK6    | 0.501013 |
| cnv_GRPEL2  | 0.246508 |
| cnv_GSE1    | 0.426572 |
| cnv_GSKIP   | 0.389687 |
| cnv_GSPT1   | 0.41594  |
| cnv_GSR     | 0.553611 |
| cnv_GSTA4   | 0.157214 |
| cnv_GSTK1   | 0.521768 |
| cnv_GSTM1   | 0.416343 |
| cnv_GSTM2   | 0.406884 |
| cnv_GSTM4   | 0.363734 |
| cnv_GSTZ1   | 0.539871 |
| cnv_GTF2A1  | 0.35711  |
| cnv_GTF2A2  | 0.507279 |
| cnv_GTF2B   | 0.484707 |
| cnv_GTF2E2  | 0.589303 |
| cnv_GTF2F1  | 0.520003 |
| cnv_GTF2F2  | 0.518015 |
| cnv_GTF2H1  | 0.5008   |
| cnv_GTF2H2  | 0.408229 |
| cnv_GTF2H2B | 0.307807 |
| cnv_GTF2H2C | 0.341793 |
| cnv_GTF2H3  | 0.270295 |
| cnv_GTF2H4  | 0.467647 |
| cnv_GTF2I   | 0.468917 |
| cnv_GTF2IP1 | 0.496232 |
| cnv_GTF3A   | 0.595976 |
| cnv_GTF3C6  | 0.399511 |
| cnv_GTPBP8  | 0.433902 |
| cnv_GUCD1   | 0.505313 |
| cnv_GUSBP3  | 0.332372 |
| cnv_GVINP1  | 0.372642 |
| cnv_GYG1    | 0.496949 |
| cnv_GYS1    | 0.26664  |
| cnv_GZF1    | 0.335202 |

|               |          |
|---------------|----------|
| cnv_H2AFV     | 0.505641 |
| cnv_H3F3A     | 0.268922 |
| cnv_H3F3B     | 0.227131 |
| cnv_HACL1     | 0.46395  |
| cnv_HADHB     | 0.219037 |
| cnv_HARS      | 0.620063 |
| cnv_HAT1      | 0.294497 |
| cnv_HAUS1     | 0.490975 |
| cnv_HAUS4     | 0.365776 |
| cnv_HAUS7     | 0.503427 |
| cnv_HBS1L     | 0.535297 |
| cnv_HCLS1     | 0.402863 |
| cnv_HDAC1     | 0.331748 |
| cnv_HDDC2     | 0.552594 |
| cnv_HDDC3     | 0.493723 |
| cnv_HDGF      | 0.6771   |
| cnv_HDHD2     | 0.50178  |
| cnv_HEATR1    | 0.603255 |
| cnv_HEATR3    | 0.239212 |
| cnv_HEBP1     | 0.274753 |
| cnv_HECA      | 0.518922 |
| cnv_HECTD1    | 0.461257 |
| cnv_HECTD3    | 0.370287 |
| cnv_HEIH      | 0.394194 |
| cnv_HERC1     | 0.405292 |
| cnv_HERC5     | 0.388548 |
| cnv_HERPUD1   | 0.493737 |
| cnv_HERPUD2   | 0.397034 |
| cnv_HESX1     | 0.312163 |
| cnv_HEY2      | 0.409345 |
| cnv_HIBADH    | 0.501392 |
| cnv_HIGD1A    | 0.380201 |
| cnv_HIGD2A    | 0.645567 |
| cnv_HILPDA    | 0.349297 |
| cnv_HINFP     | 0.723831 |
| cnv_HINT1     | 0.583421 |
| cnv_HINT2     | 0.47838  |
| cnv_HIPK2     | 0.435336 |
| cnv_HIPK3     | 0.267422 |
| cnv_HIST1H2BN | 0.425894 |
| cnv_HLA-A     | 0.245182 |
| cnv_HMBOX1    | 0.594301 |
| cnv_HMBS      | 0.553078 |
| cnv_HMCES     | 0.276199 |
| cnv_HMG20A    | 0.433382 |
| cnv_HMGB1     | 0.539421 |
| cnv_HMGB3     | 0.299877 |

|              |          |
|--------------|----------|
| cnv_HMGCS1   | 0.310195 |
| cnv_HMGN1    | 0.467687 |
| cnv_HMGN2    | 0.358002 |
| cnv_HMGN3    | 0.490781 |
| cnv_HMGN4    | 0.45224  |
| cnv_HMGXB4   | 0.242518 |
| cnv_HNRNPA3  | 0.31365  |
| cnv_HNRNPAB  | 0.291421 |
| cnv_HNRNPH2  | 0.362103 |
| cnv_HNRNPR   | 0.352896 |
| cnv_HNRNPU   | 0.539284 |
| cnv_HOMER1   | 0.43426  |
| cnv_HOOK1    | 0.350491 |
| cnv_HOOK2    | 0.384807 |
| cnv_HP1BP3   | 0.538557 |
| cnv_HPRT1    | 0.440843 |
| cnv_HPS3     | 0.360366 |
| cnv_HPS5     | 0.396366 |
| cnv_HS2ST1   | 0.409654 |
| cnv_HSBP1    | 0.340292 |
| cnv_HSD17B11 | 0.376623 |
| cnv_HSD17B7  | 0.351577 |
| cnv_HSD17B8  | 0.418457 |
| cnv_HSDL1    | 0.362795 |
| cnv_HSF2     | 0.35563  |
| cnv_HSH2D    | 0.294628 |
| cnv_HSP90AA1 | 0.49834  |
| cnv_HSP90AB1 | 0.463813 |
| cnv_HSP90B1  | 0.323028 |
| cnv_HSPA14   | 0.290136 |
| cnv_HSPA4    | 0.468694 |
| cnv_HSPA9    | 0.340405 |
| cnv_HSPB11   | 0.414    |
| cnv_HSPH1    | 0.443886 |
| cnv_HTATIP2  | 0.30212  |
| cnv_HTATSF1  | 0.527227 |
| cnv_HYI      | 0.420995 |
| cnv_HYKK     | 0.412654 |
| cnv_HYLS1    | 0.459116 |
| cnv_IARS     | 0.297799 |
| cnv_IARS2    | 0.733738 |
| cnv_IBTK     | 0.448402 |
| cnv_ICAM2    | 0.394969 |
| cnv_ICAM3    | 0.408716 |
| cnv_ICAM4    | 0.279366 |
| cnv_ICE1     | 0.498548 |
| cnv_ICE2     | 0.605242 |

|             |          |
|-------------|----------|
| cnv_IDE     | 0.302639 |
| cnv_IDH2    | 0.468253 |
| cnv_IDH3A   | 0.565162 |
| cnv_IDH3B   | 0.536985 |
| cnv_IDH3G   | 0.517671 |
| cnv_IDS     | 0.611713 |
| cnv_IER3IP1 | 0.517039 |
| cnv_IER5    | 0.283453 |
| cnv_IFFO2   | 0.282748 |
| cnv_IFI16   | 0.496499 |
| cnv_IFI30   | 0.299898 |
| cnv_IFITM1  | 0.300837 |
| cnv_IFITM2  | 0.302698 |
| cnv_IFNAR1  | 0.360714 |
| cnv_IFNAR2  | 0.410493 |
| cnv_IFNGR2  | 0.450839 |
| cnv_IFNLR1  | 0.281734 |
| cnv_IFRD2   | 0.355684 |
| cnv_IFT172  | 0.329524 |
| cnv_IFT22   | 0.28673  |
| cnv_IFT46   | 0.524231 |
| cnv_IFT88   | 0.309215 |
| cnv_IGF2R   | 0.592175 |
| cnv_IGIP    | 0.352071 |
| cnv_IGSF8   | 0.382401 |
| cnv_IK      | 0.511541 |
| cnv_IKBKB   | 0.535376 |
| cnv_IKZF3   | 0.208016 |
| cnv_IL10RB  | 0.549023 |
| cnv_IL17RA  | 0.321125 |
| cnv_IL6R    | 0.409492 |
| cnv_ILF2    | 0.65458  |
| cnv_ILF3    | 0.447111 |
| cnv_IMMP1L  | 0.372182 |
| cnv_IMMP2L  | 0.308112 |
| cnv_IMP3    | 0.425781 |
| cnv_IMPA1   | 0.428037 |
| cnv_IMPA2   | 0.284209 |
| cnv_IMPACT  | 0.313944 |
| cnv_IMPAD1  | 0.502075 |
| cnv_IMPDH1  | 0.374632 |
| cnv_IMPDH2  | 0.310126 |
| cnv_ING2    | 0.361554 |
| cnv_ING3    | 0.413544 |
| cnv_INO80E  | 0.460408 |
| cnv_INPP5A  | 0.316184 |
| cnv_INSIG1  | 0.282025 |



|                |          |
|----------------|----------|
| cnv_INTS2      | 0.34221  |
| cnv_INTS5      | 0.352955 |
| cnv_INTS6      | 0.494181 |
| cnv_INTS6-AS1  | 0.388653 |
| cnv_INTS8      | 0.522418 |
| cnv_IP6K2      | 0.475741 |
| cnv_IPO4       | 0.383792 |
| cnv_IPO5       | 0.545216 |
| cnv_IPO7       | 0.484711 |
| cnv_IPO8       | 0.345002 |
| cnv_IQCB1      | 0.296661 |
| cnv_IQCH-AS1   | 0.487748 |
| cnv_IQGAP2     | 0.279163 |
| cnv_IRAK1      | 0.470247 |
| cnv_IREB2      | 0.481189 |
| cnv_IRF1       | 0.302775 |
| cnv_IRF2BP2    | 0.389231 |
| cnv_IRF2BPL    | 0.461673 |
| cnv_IRF5       | 0.384079 |
| cnv_IRF7       | 0.377425 |
| cnv_IRF9       | 0.523065 |
| cnv_ISCA1      | 0.48017  |
| cnv_ISCA2      | 0.462828 |
| cnv_ISCU       | 0.215849 |
| cnv_ISG20      | 0.427278 |
| cnv_ISG20L2    | 0.612051 |
| cnv_ISL2       | 0.442122 |
| cnv_ISY1-RAB43 | 0.419354 |
| cnv_ITCH       | 0.365767 |
| cnv_ITGAE      | 0.414933 |
| cnv_ITGAL      | 0.444306 |
| cnv_ITM2B      | 0.557206 |
| cnv_IVNS1ABP   | 0.471102 |
| cnv_JADE1      | 0.48322  |
| cnv_JADE2      | 0.305288 |
| cnv_JAGN1      | 0.417543 |
| cnv_JAK1       | 0.39792  |
| cnv_JAK2       | 0.315356 |
| cnv_JDP2       | 0.260252 |
| cnv_JKAMP      | 0.428712 |
| cnv_JMJD1C     | 0.381707 |
| cnv_JMY        | 0.494743 |
| cnv_JOSD1      | 0.370057 |
| cnv_JRKL       | 0.554344 |
| cnv_JTB        | 0.687944 |
| cnv_JUN        | 0.32639  |
| cnv_KANSL1-AS1 | 0.18907  |

|              |          |
|--------------|----------|
| cnv_KARS     | 0.587542 |
| cnv_KAT2B    | 0.240823 |
| cnv_KAT5     | 0.575392 |
| cnv_KAT6B    | 0.274688 |
| cnv_KAT7     | 0.29433  |
| cnv_KATNA1   | 0.437762 |
| cnv_KATNBL1  | 0.404961 |
| cnv_KBTBD2   | 0.415034 |
| cnv_KBTBD3   | 0.557423 |
| cnv_KBTBD4   | 0.529759 |
| cnv_KCNA3    | 0.27941  |
| cnv_KCNN3    | 0.286924 |
| cnv_KCTD13   | 0.470425 |
| cnv_KCTD20   | 0.450083 |
| cnv_KCTD21   | 0.249055 |
| cnv_KCTD3    | 0.529163 |
| cnv_KCTD6    | 0.433573 |
| cnv_KCTD9    | 0.41289  |
| cnv_KDELR1   | 0.316332 |
| cnv_KDELR2   | 0.460879 |
| cnv_KDM1A    | 0.337441 |
| cnv_KDM2B    | 0.256521 |
| cnv_KDM3B    | 0.302072 |
| cnv_KDM5A    | 0.31413  |
| cnv_KDM5B    | 0.25444  |
| cnv_KDM6A    | 0.428414 |
| cnv_KEAP1    | 0.35431  |
| cnv_KHNYN    | 0.471501 |
| cnv_KIAA0040 | 0.376507 |
| cnv_KIAA0232 | 0.375929 |
| cnv_KIAA0430 | 0.462166 |
| cnv_KIAA0513 | 0.322456 |
| cnv_KIAA0753 | 0.395091 |
| cnv_KIAA0907 | 0.409985 |
| cnv_KIAA0930 | 0.35911  |
| cnv_KIAA1024 | 0.4207   |
| cnv_KIAA1143 | 0.49781  |
| cnv_KIAA1191 | 0.559306 |
| cnv_KIAA1468 | 0.536891 |
| cnv_KIAA1551 | 0.250493 |
| cnv_KIF13B   | 0.546653 |
| cnv_KIF21A   | 0.27461  |
| cnv_KIF21B   | 0.445633 |
| cnv_KIF22    | 0.520945 |
| cnv_KIF3B    | 0.250861 |
| cnv_KIFAP3   | 0.602331 |
| cnv_KIZ      | 0.312466 |

|             |          |
|-------------|----------|
| cnv_KLC2    | 0.421761 |
| cnv_KLHDC2  | 0.441862 |
| cnv_KLHDC3  | 0.479464 |
| cnv_KLHDC9  | 0.472332 |
| cnv_KLHL12  | 0.616176 |
| cnv_KLHL2   | 0.225022 |
| cnv_KLHL20  | 0.622949 |
| cnv_KLHL21  | 0.43515  |
| cnv_KLHL24  | 0.231867 |
| cnv_KLHL26  | 0.349331 |
| cnv_KLHL28  | 0.497353 |
| cnv_KLHL6   | 0.38348  |
| cnv_KLHL7   | 0.413742 |
| cnv_KMT2A   | 0.440016 |
| cnv_KNSTRN  | 0.362959 |
| cnv_KNTC1   | 0.365936 |
| cnv_KPNA1   | 0.49449  |
| cnv_KPNA3   | 0.492234 |
| cnv_KPNA5   | 0.461111 |
| cnv_KPNB1   | 0.294408 |
| cnv_KPTN    | 0.353737 |
| cnv_KRAS    | 0.322975 |
| cnv_KRCC1   | 0.266102 |
| cnv_KRIT1   | 0.331334 |
| cnv_KRT10   | 0.196698 |
| cnv_KTN1    | 0.60347  |
| cnv_L3HYPDH | 0.389491 |
| cnv_LACTB   | 0.357772 |
| cnv_LAGE3   | 0.546529 |
| cnv_LAMC1   | 0.307621 |
| cnv_LAMP1   | 0.470075 |
| cnv_LAMP2   | 0.488973 |
| cnv_LAMTOR1 | 0.561261 |
| cnv_LAMTOR2 | 0.617996 |
| cnv_LAMTOR4 | 0.601933 |
| cnv_LAMTOR5 | 0.60348  |
| cnv_LAPTM4A | 0.227811 |
| cnv_LARP1B  | 0.426978 |
| cnv_LARP4   | 0.280813 |
| cnv_LASP1   | 0.248912 |
| cnv_LATS2   | 0.293276 |
| cnv_LBR     | 0.498781 |
| cnv_LCMT1   | 0.565742 |
| cnv_LCMT2   | 0.257419 |
| cnv_LCOR    | 0.291291 |
| cnv_LCORL   | 0.347877 |
| cnv_LDLRAP1 | 0.464638 |

|                  |          |
|------------------|----------|
| cnv_LEAP2        | 0.317595 |
| cnv_LEO1         | 0.555544 |
| cnv_LEPROTL1     | 0.527239 |
| cnv_LGALS1       | 0.119896 |
| cnv_LGALS8       | 0.511685 |
| cnv_LGALSL       | 0.323163 |
| cnv_LGMN         | 0.230787 |
| cnv_LHPP         | 0.380193 |
| cnv_LHX4-AS1     | 0.325377 |
| cnv_LIG4         | 0.430285 |
| cnv_LIME1        | 0.38609  |
| cnv_LIMS1        | 0.257818 |
| cnv_LIMS3        | 0.251222 |
| cnv_LIN52        | 0.395614 |
| cnv_LIN7C        | 0.433575 |
| cnv_LINC00094    | 0.27306  |
| cnv_LINC00294    | 0.32804  |
| cnv_LINC00339    | 0.288995 |
| cnv_LINC00526    | 0.4014   |
| cnv_LINC00528    | 0.295865 |
| cnv_LINC00667    | 0.479437 |
| cnv_LINC00888    | 0.261108 |
| cnv_LINC00893    | 0.312397 |
| cnv_LINC00909    | 0.380592 |
| cnv_LINC00969    | 0.331341 |
| cnv_LIX1L        | 0.324126 |
| cnv_LMAN1        | 0.457838 |
| cnv_LMAN2L       | 0.281401 |
| cnv_LMBRD1       | 0.496073 |
| cnv_LMBRD2       | 0.273064 |
| cnv_LMNA         | 0.24525  |
| cnv_LMNB2        | 0.300691 |
| cnv_LMO4         | 0.512862 |
| cnv_LNP1         | 0.487089 |
| cnv_LNPEP        | 0.389139 |
| cnv_LNX2         | 0.48358  |
| cnv_LOC100049716 | 0.348249 |
| cnv_LOC100129518 | 0.49511  |
| cnv_LOC100147773 | 0.448503 |
| cnv_LOC100270804 | 0.27854  |
| cnv_LOC100287497 | 0.313217 |
| cnv_LOC100506548 | 0.504459 |
| cnv_LOC100506844 | 0.349494 |
| cnv_LOC100506990 | 0.227706 |
| cnv_LOC100507431 | 0.352204 |
| cnv_LOC100507670 | 0.390766 |
| cnv_LOC101926963 | 0.307882 |

|                  |          |
|------------------|----------|
| cnv_LOC101927178 | 0.243736 |
| cnv_LOC101927204 | 0.517515 |
| cnv_LOC101927420 | 0.263701 |
| cnv_LOC101927974 | 0.277724 |
| cnv_LOC101928000 | 0.336432 |
| cnv_LOC101928111 | 0.257855 |
| cnv_LOC101928143 | 0.609712 |
| cnv_LOC101929243 | 0.20169  |
| cnv_LOC102606465 | 0.403416 |
| cnv_LOC102724532 | 0.280336 |
| cnv_LOC150776    | 0.365869 |
| cnv_LOC374443    | 0.250264 |
| cnv_LOC440434    | 0.273815 |
| cnv_LOC643733    | 0.29163  |
| cnv_LOC728613    | 0.310264 |
| cnv_LOC730098    | 0.280718 |
| cnv_LONP2        | 0.622894 |
| cnv_LONRF1       | 0.386894 |
| cnv_LPIN2        | 0.320603 |
| cnv_LPXN         | 0.291813 |
| cnv_LRBA         | 0.260418 |
| cnv_LRCH1        | 0.494033 |
| cnv_LRMP         | 0.288985 |
| cnv_LRP10        | 0.280074 |
| cnv_LRRC37B      | 0.286258 |
| cnv_LRRC40       | 0.282717 |
| cnv_LRRC42       | 0.461126 |
| cnv_LRRC47       | 0.525363 |
| cnv_LRRC58       | 0.421029 |
| cnv_LRRC8C       | 0.389612 |
| cnv_LRRD1        | 0.376679 |
| cnv_LRRFIP1      | 0.226859 |
| cnv_LRWD1        | 0.507124 |
| cnv_LSG1         | 0.46148  |
| cnv_LSM1         | 0.719977 |
| cnv_LSM10        | 0.483969 |
| cnv_LSM14A       | 0.316016 |
| cnv_LSM2         | 0.491041 |
| cnv_LSM4         | 0.457137 |
| cnv_LSM5         | 0.518862 |
| cnv_LSM7         | 0.591808 |
| cnv_LSM8         | 0.37545  |
| cnv_LTN1         | 0.363857 |
| cnv_LTV1         | 0.508741 |
| cnv_LUC7L2       | 0.44888  |
| cnv_LUC7L3       | 0.366406 |
| cnv_LUZP6        | 0.329053 |

|               |          |
|---------------|----------|
| cnv_LYN       | 0.339194 |
| cnv_LYPLA1    | 0.368032 |
| cnv_LYPLAL1   | 0.39487  |
| cnv_LYRM1     | 0.371535 |
| cnv_LYRM4     | 0.487844 |
| cnv_LYRM7     | 0.345424 |
| cnv_LYSMD2    | 0.270439 |
| cnv_LYSMD4    | 0.352449 |
| cnv_LZIC      | 0.471893 |
| cnv_LZTFL1    | 0.288547 |
| cnv_M6PR      | 0.519709 |
| cnv_MAD2L1BP  | 0.296129 |
| cnv_MAD2L2    | 0.257207 |
| cnv_MAEA      | 0.476684 |
| cnv_MAF1      | 0.446681 |
| cnv_MAGED4    | 0.134954 |
| cnv_MAGED4B   | 0.15239  |
| cnv_MAGOH     | 0.413863 |
| cnv_MAK16     | 0.407441 |
| cnv_MALT1     | 0.509489 |
| cnv_MAML1     | 0.367417 |
| cnv_MAML2     | 0.369971 |
| cnv_MAN1A1    | 0.287455 |
| cnv_MAN1A2    | 0.43277  |
| cnv_MAN1C1    | 0.206309 |
| cnv_MAN2A1    | 0.399321 |
| cnv_MAN2A2    | 0.27684  |
| cnv_MAN2B2    | 0.388654 |
| cnv_MANBA     | 0.441101 |
| cnv_MANEA     | 0.299582 |
| cnv_MAP1LC3B  | 0.555766 |
| cnv_MAP2K3    | 0.319758 |
| cnv_MAP2K4    | 0.465678 |
| cnv_MAP3K13   | 0.424079 |
| cnv_MAP3K14   | 0.281274 |
| cnv_MAP3K4    | 0.593587 |
| cnv_MAP3K5    | 0.322329 |
| cnv_MAP3K7    | 0.514991 |
| cnv_MAP4K5    | 0.443075 |
| cnv_MAP7D1    | 0.362867 |
| cnv_MAPK1     | 0.40418  |
| cnv_MAPK13    | 0.275383 |
| cnv_MAPK1IP1L | 0.633735 |
| cnv_MAPK8     | 0.317297 |
| cnv_MAPKAPK5  | 0.429187 |
| cnv_MAPRE1    | 0.403775 |
| cnv_MARCH5    | 0.305029 |

|               |          |
|---------------|----------|
| cnv_MARCKS    | 0.194273 |
| cnv_MARS      | 0.443865 |
| cnv_MAT2B     | 0.333054 |
| cnv_MATN1-AS1 | 0.354333 |
| cnv_MAX       | 0.531758 |
| cnv_MBD4      | 0.391951 |
| cnv_MBIP      | 0.269745 |
| cnv_MBNL2     | 0.476215 |
| cnv_MBNL3     | 0.4565   |
| cnv_MBTPS1    | 0.511945 |
| cnv_MCC       | 0.440528 |
| cnv_MCCC1     | 0.405653 |
| cnv_MCL1      | 0.374435 |
| cnv_MCM3      | 0.243815 |
| cnv_MCM4      | 0.285522 |
| cnv_MCM5      | 0.166512 |
| cnv_MCM7      | 0.420983 |
| cnv_MCOLN1    | 0.338904 |
| cnv_MCPH1     | 0.583487 |
| cnv_MCRS1     | 0.404255 |
| cnv_MCTP2     | 0.403637 |
| cnv_MCUR1     | 0.526241 |
| cnv_MDC1      | 0.345891 |
| cnv_MDH2      | 0.574965 |
| cnv_MDM4      | 0.416189 |
| cnv_MDN1      | 0.43695  |
| cnv_MDP1      | 0.493447 |
| cnv_MEA1      | 0.487281 |
| cnv_MECP2     | 0.50711  |
| cnv_MED1      | 0.33099  |
| cnv_MED10     | 0.484217 |
| cnv_MED11     | 0.428137 |
| cnv_MED13     | 0.289069 |
| cnv_MED17     | 0.574097 |
| cnv_MED19     | 0.62894  |
| cnv_MED20     | 0.312989 |
| cnv_MED23     | 0.568743 |
| cnv_MED26     | 0.333896 |
| cnv_MED29     | 0.263629 |
| cnv_MED30     | 0.478932 |
| cnv_MED31     | 0.437742 |
| cnv_MED4      | 0.442279 |
| cnv_MED6      | 0.601193 |
| cnv_MED7      | 0.366412 |
| cnv_MED8      | 0.368271 |
| cnv_MEF2A     | 0.457531 |
| cnv_MEIS2     | 0.437338 |

|             |          |
|-------------|----------|
| cnv_MEN1    | 0.41515  |
| cnv_MEPC    | 0.437132 |
| cnv_METTL1  | 0.308742 |
| cnv_METTL13 | 0.555501 |
| cnv_METTL18 | 0.458495 |
| cnv_METTL23 | 0.564338 |
| cnv_METTL25 | 0.427605 |
| cnv_METTL2B | 0.32732  |
| cnv_METTL3  | 0.440301 |
| cnv_METTL4  | 0.495352 |
| cnv_MEX3C   | 0.455135 |
| cnv_MFAP1   | 0.37589  |
| cnv_MFF     | 0.311878 |
| cnv_MFSD1   | 0.244987 |
| cnv_MFSD8   | 0.297927 |
| cnv_MGAT1   | 0.420871 |
| cnv_MGAT2   | 0.288773 |
| cnv_MGEA5   | 0.322908 |
| cnv_MGRN1   | 0.316187 |
| cnv_MIA3    | 0.465159 |
| cnv_MIB1    | 0.42147  |
| cnv_MICAL1  | 0.303415 |
| cnv_MICB    | 0.31916  |
| cnv_MICU1   | 0.361173 |
| cnv_MICU2   | 0.502314 |
| cnv_MID2    | 0.365619 |
| cnv_MIER1   | 0.43163  |
| cnv_MIER3   | 0.46179  |
| cnv_MIF4GD  | 0.481218 |
| cnv_MIOS    | 0.494095 |
| cnv_MIR1236 | 0.572949 |
| cnv_MIR1248 | 0.289148 |
| cnv_MIR1304 | 0.624193 |
| cnv_MIR186  | 0.391047 |
| cnv_MIR21   | 0.265494 |
| cnv_MIR3620 | 0.701172 |
| cnv_MIR3652 | 0.356592 |
| cnv_MIR3656 | 0.413773 |
| cnv_MIR3658 | 0.463462 |
| cnv_MIR4467 | 0.507124 |
| cnv_MIR4647 | 0.454904 |
| cnv_MIR4657 | 0.419182 |
| cnv_MIR4707 | 0.365776 |
| cnv_MIR5193 | 0.302292 |
| cnv_MIR6132 | 0.553929 |
| cnv_MIR6513 | 0.259442 |
| cnv_MIR664B | 0.443859 |



|              |          |
|--------------|----------|
| cnv_MIR6741  | 0.554376 |
| cnv_MIR6748  | 0.337674 |
| cnv_MIR6751  | 0.295562 |
| cnv_MIR6758  | 0.429584 |
| cnv_MIR6778  | 0.240418 |
| cnv_MIR6800  | 0.255378 |
| cnv_MIR6805  | 0.416576 |
| cnv_MIR6824  | 0.349402 |
| cnv_MIR6831  | 0.429259 |
| cnv_MIR6837  | 0.350428 |
| cnv_MIR6840  | 0.476836 |
| cnv_MIR6845  | 0.293476 |
| cnv_MIR6866  | 0.362371 |
| cnv_MIR6878  | 0.756168 |
| cnv_MIR6883  | 0.292209 |
| cnv_MIR6884  | 0.394183 |
| cnv_MIR6890  | 0.384153 |
| cnv_MIS12    | 0.402901 |
| cnv_MIS18A   | 0.349826 |
| cnv_MIS18BP1 | 0.414227 |
| cnv_MKKS     | 0.457008 |
| cnv_MKLN1    | 0.355714 |
| cnv_MKKN2    | 0.285749 |
| cnv_MKRN1    | 0.339512 |
| cnv_MLEC     | 0.39299  |
| cnv_MLF2     | 0.453483 |
| cnv_MLH1     | 0.326708 |
| cnv_MLKL     | 0.390299 |
| cnv_MLLT11   | 0.381603 |
| cnv_MMGT1    | 0.57339  |
| cnv_MNAT1    | 0.439694 |
| cnv_MOAP1    | 0.580605 |
| cnv_MOB1A    | 0.293481 |
| cnv_MOCS2    | 0.370987 |
| cnv_MON1B    | 0.532632 |
| cnv_MON2     | 0.34458  |
| cnv_MORC1    | 0.323059 |
| cnv_MORC3    | 0.39432  |
| cnv_MORC4    | 0.546786 |
| cnv_MORF4L1  | 0.560824 |
| cnv_MORF4L2  | 0.342926 |
| cnv_MOSPD1   | 0.472787 |
| cnv_MPC1     | 0.596264 |
| cnv_MPC2     | 0.664353 |
| cnv_MPHOSPH6 | 0.42418  |
| cnv_MPHOSPH8 | 0.57505  |
| cnv_MPLKIP   | 0.337023 |

|                |          |
|----------------|----------|
| cnv_MPP1       | 0.231686 |
| cnv_MPP5       | 0.410812 |
| cnv_MPV17      | 0.439278 |
| cnv_MPV17L2    | 0.276351 |
| cnv_MPZL1      | 0.444215 |
| cnv_MR1        | 0.488007 |
| cnv_MRFAP1     | 0.365606 |
| cnv_MRI1       | 0.263325 |
| cnv_MROH7-TTC4 | 0.317319 |
| cnv_MRPL11     | 0.451219 |
| cnv_MRPL13     | 0.421965 |
| cnv_MRPL14     | 0.392382 |
| cnv_MRPL16     | 0.417104 |
| cnv_MRPL17     | 0.375334 |
| cnv_MRPL18     | 0.596164 |
| cnv_MRPL2      | 0.391094 |
| cnv_MRPL21     | 0.4933   |
| cnv_MRPL22     | 0.538694 |
| cnv_MRPL24     | 0.666644 |
| cnv_MRPL3      | 0.309073 |
| cnv_MRPL32     | 0.386474 |
| cnv_MRPL34     | 0.575653 |
| cnv_MRPL36     | 0.517916 |
| cnv_MRPL39     | 0.428931 |
| cnv_MRPL4      | 0.503075 |
| cnv_MRPL40     | 0.453399 |
| cnv_MRPL43     | 0.401849 |
| cnv_MRPL46     | 0.474529 |
| cnv_MRPL48     | 0.409505 |
| cnv_MRPL49     | 0.451203 |
| cnv_MRPL50     | 0.475559 |
| cnv_MRPL51     | 0.530248 |
| cnv_MRPL53     | 0.303765 |
| cnv_MRPL54     | 0.609045 |
| cnv_MRPL57     | 0.477669 |
| cnv_MRPL9      | 0.782719 |
| cnv_MRPS10     | 0.419645 |
| cnv_MRPS14     | 0.631631 |
| cnv_MRPS17     | 0.396796 |
| cnv_MRPS18A    | 0.459197 |
| cnv_MRPS18B    | 0.523078 |
| cnv_MRPS21     | 0.368311 |
| cnv_MRPS22     | 0.407819 |
| cnv_MRPS24     | 0.5337   |
| cnv_MRPS25     | 0.456675 |
| cnv_MRPS28     | 0.386319 |
| cnv_MRPS30     | 0.390149 |

|                 |          |
|-----------------|----------|
| cnv_MRPS31      | 0.619222 |
| cnv_MRPS31P5    | 0.474549 |
| cnv_MRPS33      | 0.506556 |
| cnv_MRPS34      | 0.343995 |
| cnv_MRPS36      | 0.614476 |
| cnv_MRPS6       | 0.342371 |
| cnv_MRPS7       | 0.430944 |
| cnv_MRRF        | 0.60123  |
| cnv_MRS2        | 0.475036 |
| cnv_MSANTD2     | 0.463646 |
| cnv_MSANTD3     | 0.41337  |
| cnv_MSANTD4     | 0.538411 |
| cnv_MSH5        | 0.420744 |
| cnv_MSH5-SAPCD1 | 0.421133 |
| cnv_MSL2        | 0.269359 |
| cnv_MSRB1       | 0.251652 |
| cnv_MSTO1       | 0.666017 |
| cnv_MSTO2P      | 0.620909 |
| cnv_MT1E        | 0.191611 |
| cnv_MT1F        | 0.219856 |
| cnv_MT1X        | 0.284404 |
| cnv_MTA2        | 0.256242 |
| cnv_MTAP        | 0.330149 |
| cnv_MTCH1       | 0.460844 |
| cnv_MTCH2       | 0.39226  |
| cnv_MTDH        | 0.383675 |
| cnv_MTERF3      | 0.390018 |
| cnv_MTF2        | 0.413508 |
| cnv_MTFMT       | 0.557956 |
| cnv_MTFP1       | 0.305571 |
| cnv_MTFR1       | 0.424706 |
| cnv_MTG1        | 0.201148 |
| cnv_MTHFD1      | 0.485063 |
| cnv_MTHFD1L     | 0.35568  |
| cnv_MTMR1       | 0.590509 |
| cnv_MTMR12      | 0.42772  |
| cnv_MTMR2       | 0.56905  |
| cnv_MTMR4       | 0.366777 |
| cnv_MTMR9       | 0.520747 |
| cnv_MTO1        | 0.517772 |
| cnv_MTR         | 0.589551 |
| cnv_MTRR        | 0.351978 |
| cnv_MTUS1       | 0.351321 |
| cnv_MTX1        | 0.657746 |
| cnv_MTX3        | 0.326418 |
| cnv_MUS81       | 0.506379 |
| cnv_MUT         | 0.430071 |

|             |          |
|-------------|----------|
| cnv_MX11    | 0.267832 |
| cnv_MYBL2   | 0.380455 |
| cnv_MYCBP2  | 0.714055 |
| cnv_MYD88   | 0.407129 |
| cnv_MYEOV   | 0.271423 |
| cnv_MYH9    | 0.380926 |
| cnv_MYL12A  | 0.398044 |
| cnv_MYL12B  | 0.614043 |
| cnv_MYL6B   | 0.365026 |
| cnv_MYO18A  | 0.261109 |
| cnv_MYO5A   | 0.243217 |
| cnv_MZF1    | 0.450338 |
| cnv_MZT1    | 0.540553 |
| cnv_MZT2A   | 0.33577  |
| cnv_N4BP1   | 0.492784 |
| cnv_N4BP2   | 0.216575 |
| cnv_N4BP2L2 | 0.620038 |
| cnv_NAA10   | 0.492986 |
| cnv_NAA16   | 0.504011 |
| cnv_NAA20   | 0.45156  |
| cnv_NAA35   | 0.460005 |
| cnv_NAA38   | 0.403091 |
| cnv_NAA40   | 0.566439 |
| cnv_NAA50   | 0.414661 |
| cnv_NAE1    | 0.409893 |
| cnv_NAGA    | 0.264405 |
| cnv_NAGK    | 0.282185 |
| cnv_NAGPA   | 0.332354 |
| cnv_NAPB    | 0.369241 |
| cnv_NAPG    | 0.489151 |
| cnv_NARS    | 0.504019 |
| cnv_NARS2   | 0.424331 |
| cnv_NASP    | 0.267878 |
| cnv_NAT1    | 0.312189 |
| cnv_NAT10   | 0.410199 |
| cnv_NBEA    | 0.254151 |
| cnv_NBN     | 0.455445 |
| cnv_NBPF11  | 0.358722 |
| cnv_NBPF12  | 0.331494 |
| cnv_NBPF15  | 0.351275 |
| cnv_NBPF9   | 0.38696  |
| cnv_NCAPD2  | 0.300341 |
| cnv_NCAPD3  | 0.459411 |
| cnv_NCBP1   | 0.317824 |
| cnv_NCBP2   | 0.357464 |
| cnv_NCF1    | 0.280544 |
| cnv_NCF1B   | 0.254643 |

|                |          |
|----------------|----------|
| cnv_NCF1C      | 0.272106 |
| cnv_NCK1       | 0.397908 |
| cnv_NCK1-AS1   | 0.352993 |
| cnv_NCKAP1L    | 0.382991 |
| cnv_NCOA1      | 0.257553 |
| cnv_NCOA2      | 0.383422 |
| cnv_NCOA7      | 0.438236 |
| cnv_NDFIP1     | 0.426527 |
| cnv_NDFIP2     | 0.647698 |
| cnv_NDNF       | 0.330233 |
| cnv_NDUFA1     | 0.523881 |
| cnv_NDUFA12    | 0.484498 |
| cnv_NDUFA13    | 0.315782 |
| cnv_NDUFA3     | 0.42011  |
| cnv_NDUFA4     | 0.689606 |
| cnv_NDUFA5     | 0.379984 |
| cnv_NDUFA8     | 0.568373 |
| cnv_NDUFA9     | 0.461893 |
| cnv_NDUFAF1    | 0.397839 |
| cnv_NDUFAF2    | 0.501196 |
| cnv_NDUFAF3    | 0.389798 |
| cnv_NDUFAF6    | 0.417507 |
| cnv_NDUFB10    | 0.503428 |
| cnv_NDUFB5     | 0.493438 |
| cnv_NDUFB6     | 0.467805 |
| cnv_NDUFB9     | 0.58096  |
| cnv_NDUFC1     | 0.428903 |
| cnv_NDUFS2     | 0.648187 |
| cnv_NDUFS3     | 0.512933 |
| cnv_NDUFS4     | 0.623902 |
| cnv_NDUFS6     | 0.654426 |
| cnv_NDUFV2     | 0.4761   |
| cnv_NDUFV3     | 0.527613 |
| cnv_NECAP1     | 0.418434 |
| cnv_NEDD1      | 0.306787 |
| cnv_NEDD8      | 0.536224 |
| cnv_NEDD8-MDP1 | 0.493447 |
| cnv_NEK3       | 0.465687 |
| cnv_NEK4       | 0.313221 |
| cnv_NEK7       | 0.514744 |
| cnv_NELFCD     | 0.507494 |
| cnv_NELFE      | 0.572775 |
| cnv_NEMF       | 0.547218 |
| cnv_NEO1       | 0.310597 |
| cnv_NES        | 0.490276 |
| cnv_NEU1       | 0.412038 |
| cnv_NFE2L1     | 0.269377 |

|              |          |
|--------------|----------|
| cnv_NFKB1    | 0.319643 |
| cnv_NFS1     | 0.342004 |
| cnv_NFU1     | 0.33161  |
| cnv_NFX1     | 0.409554 |
| cnv_NGLY1    | 0.317221 |
| cnv_NGRN     | 0.474463 |
| cnv_NHLRC3   | 0.381686 |
| cnv_NHP2     | 0.390138 |
| cnv_NIP7     | 0.311245 |
| cnv_NIPA1    | 0.373204 |
| cnv_NIPA2    | 0.539305 |
| cnv_NIPAL2   | 0.297777 |
| cnv_NIPBL    | 0.359292 |
| cnv_NIT2     | 0.410388 |
| cnv_NKAP     | 0.533942 |
| cnv_NLRC5    | 0.303243 |
| cnv_NMB      | 0.370197 |
| cnv_NMD3     | 0.456952 |
| cnv_NME3     | 0.351393 |
| cnv_NME6     | 0.359407 |
| cnv_NME7     | 0.289279 |
| cnv_NNT      | 0.403008 |
| cnv_NNT-AS1  | 0.339889 |
| cnv_NOL11    | 0.256725 |
| cnv_NOL7     | 0.548983 |
| cnv_NOL8     | 0.537626 |
| cnv_NOM1     | 0.370832 |
| cnv_NOP10    | 0.480762 |
| cnv_NOP16    | 0.370176 |
| cnv_NOSIP    | 0.374551 |
| cnv_NPAT     | 0.535039 |
| cnv_NPC2     | 0.349591 |
| cnv_NPEPPS   | 0.432001 |
| cnv_NPM1     | 0.460418 |
| cnv_NPTN     | 0.390019 |
| cnv_NPTN-IT1 | 0.3124   |
| cnv_NR1H2    | 0.324462 |
| cnv_NR2C2    | 0.288743 |
| cnv_NR3C1    | 0.258331 |
| cnv_NRBP1    | 0.382863 |
| cnv_NRBP2    | 0.292941 |
| cnv_NRG2     | 0.615146 |
| cnv_NSA2     | 0.588145 |
| cnv_NSDHL    | 0.600561 |
| cnv_NSMAF    | 0.407333 |
| cnv_NSMCE1   | 0.344211 |
| cnv_NSUN2    | 0.562798 |

|              |          |
|--------------|----------|
| cnv_NSUN5    | 0.519376 |
| cnv_NSUN5P1  | 0.468129 |
| cnv_NSUN5P2  | 0.478084 |
| cnv_NT5C2    | 0.329354 |
| cnv_NT5C3B   | 0.310797 |
| cnv_NT5DC1   | 0.554432 |
| cnv_NTAN1    | 0.341129 |
| cnv_NTPCR    | 0.652549 |
| cnv_NUBP1    | 0.43397  |
| cnv_NUBPL    | 0.343139 |
| cnv_NUCKS1   | 0.481812 |
| cnv_NUDCD1   | 0.454222 |
| cnv_NUDT15   | 0.537705 |
| cnv_NUDT18   | 0.301043 |
| cnv_NUDT2    | 0.46504  |
| cnv_NUDT21   | 0.375929 |
| cnv_NUDT3    | 0.473584 |
| cnv_NUDT9    | 0.477494 |
| cnv_NUMB     | 0.576216 |
| cnv_NUP133   | 0.560064 |
| cnv_NUP153   | 0.405188 |
| cnv_NUP155   | 0.383177 |
| cnv_NUP160   | 0.5931   |
| cnv_NUP205   | 0.387812 |
| cnv_NUP210   | 0.401217 |
| cnv_NUP43    | 0.442107 |
| cnv_NUP85    | 0.392762 |
| cnv_NUP88    | 0.422271 |
| cnv_NUP98    | 0.557814 |
| cnv_NUPL2    | 0.422965 |
| cnv_NUS1     | 0.520727 |
| cnv_NVL      | 0.65483  |
| cnv_NXT1     | 0.414736 |
| cnv_NXT2     | 0.404382 |
| cnv_OARD1    | 0.472805 |
| cnv_OCIAD2   | 0.389539 |
| cnv_OCRL     | 0.455994 |
| cnv_ODF2     | 0.392222 |
| cnv_OFD1     | 0.228593 |
| cnv_OGFOD1   | 0.551189 |
| cnv_OGFRL1   | 0.210658 |
| cnv_OIP5-AS1 | 0.383357 |
| cnv_OMA1     | 0.457738 |
| cnv_OPA1     | 0.320362 |
| cnv_OPN3     | 0.661695 |
| cnv_ORAI3    | 0.328794 |
| cnv_ORC3     | 0.500939 |

|                   |          |
|-------------------|----------|
| cnv_ORC5          | 0.444406 |
| cnv_ORMDL1        | 0.253281 |
| cnv_ORMDL2        | 0.389269 |
| cnv_OS9           | 0.370807 |
| cnv_OSBP          | 0.54595  |
| cnv_OSBPL8        | 0.409398 |
| cnv_OSBPL9        | 0.526483 |
| cnv_OSER1         | 0.281285 |
| cnv_OSGEP         | 0.427179 |
| cnv_OST4          | 0.393014 |
| cnv_OSTC          | 0.290433 |
| cnv_OSTF1         | 0.314234 |
| cnv_OSTM1         | 0.467905 |
| cnv_OTUD1         | 0.304107 |
| cnv_OTUD6B        | 0.38549  |
| cnv_OTUD6B-AS1    | 0.526705 |
| cnv_OXA1L         | 0.518946 |
| cnv_OXNAD1        | 0.442588 |
| cnv_OXSM          | 0.424092 |
| cnv_OXSR1         | 0.408191 |
| cnv_P2RX4         | 0.166753 |
| cnv_P2RX5-TAX1BP3 | 0.412712 |
| cnv_P4HA1         | 0.406235 |
| cnv_P4HTM         | 0.327767 |
| cnv_PAAF1         | 0.483137 |
| cnv_PABPC1L       | 0.392647 |
| cnv_PABPN1        | 0.404326 |
| cnv_PAFAH1B1      | 0.371484 |
| cnv_PAFAH1B3      | 0.339961 |
| cnv_PAIP1         | 0.441185 |
| cnv_PAK1          | 0.479231 |
| cnv_PAK1IP1       | 0.471515 |
| cnv_PAK2          | 0.286603 |
| cnv_PALB2         | 0.463187 |
| cnv_PALM2-AKAP2   | 0.47238  |
| cnv_PAM           | 0.422119 |
| cnv_PAN2          | 0.307758 |
| cnv_PAN3          | 0.613985 |
| cnv_PANX1         | 0.525209 |
| cnv_PAPD5         | 0.364649 |
| cnv_PAPD7         | 0.429564 |
| cnv_PAPOLA        | 0.585759 |
| cnv_PAPSS1        | 0.340833 |
| cnv_PARK7         | 0.392163 |
| cnv_PARM1         | 0.326083 |
| cnv_PARN          | 0.498431 |
| cnv_PARP1         | 0.675536 |



|                |          |
|----------------|----------|
| cnv_PARP16     | 0.554506 |
| cnv_PARP2      | 0.485038 |
| cnv_PARP3      | 0.372123 |
| cnv_PARP4      | 0.430353 |
| cnv_PARP9      | 0.315583 |
| cnv_PAXBP1     | 0.49729  |
| cnv_PAXIP1     | 0.26375  |
| cnv_PAXIP1-AS1 | 0.195176 |
| cnv_PBXIP1     | 0.341079 |
| cnv_PCAT6      | 0.353777 |
| cnv_PCBP1      | 0.31529  |
| cnv_PCBP2      | 0.316279 |
| cnv_PCF11      | 0.492183 |
| cnv_PCGF6      | 0.283301 |
| cnv_PCID2      | 0.571296 |
| cnv_PCM1       | 0.591219 |
| cnv_PCMT1      | 0.657446 |
| cnv_PCNP       | 0.249609 |
| cnv_PCYOX1     | 0.246268 |
| cnv_PDCD10     | 0.337295 |
| cnv_PDCD2L     | 0.372087 |
| cnv_PDCD5      | 0.418746 |
| cnv_PDCD6IP    | 0.354084 |
| cnv_PDCD7      | 0.393709 |
| cnv_PDCL       | 0.391288 |
| cnv_PDE8A      | 0.42747  |
| cnv_PDF        | 0.40165  |
| cnv_PDHB       | 0.457976 |
| cnv_PDHX       | 0.482093 |
| cnv_PDIA6      | 0.267638 |
| cnv_PDP1       | 0.355279 |
| cnv_PDS5A      | 0.307115 |
| cnv_PDSS2      | 0.513381 |
| cnv_PDZD8      | 0.240071 |
| cnv_PEA15      | 0.309768 |
| cnv_PEBP1      | 0.256968 |
| cnv_PEF1       | 0.420906 |
| cnv_PEMT       | 0.319613 |
| cnv_PER1       | 0.292209 |
| cnv_PET100     | 0.482106 |
| cnv_PEX1       | 0.453628 |
| cnv_PEX11B     | 0.314856 |
| cnv_PEX19      | 0.648764 |
| cnv_PEX2       | 0.479446 |
| cnv_PEX3       | 0.539551 |
| cnv_PEX7       | 0.6489   |
| cnv_PFDN2      | 0.653463 |

|              |          |
|--------------|----------|
| cnv_PFN1     | 0.257096 |
| cnv_PGAP2    | 0.330812 |
| cnv_PGGT1B   | 0.348331 |
| cnv_PGM1     | 0.423118 |
| cnv_PGM3     | 0.429742 |
| cnv_PGM5-AS1 | 0.412782 |
| cnv_PGRMC1   | 0.3995   |
| cnv_PHACTR4  | 0.413675 |
| cnv_PHAX     | 0.359681 |
| cnv_PHB      | 0.468352 |
| cnv_PHC3     | 0.276061 |
| cnv_PHF10    | 0.534772 |
| cnv_PHF11    | 0.561242 |
| cnv_PHF13    | 0.342489 |
| cnv_PHF14    | 0.410532 |
| cnv_PHF6     | 0.346489 |
| cnv_PHKB     | 0.4704   |
| cnv_PHLDA1   | 0.234606 |
| cnv_PHLPP2   | 0.237805 |
| cnv_PHTF1    | 0.263722 |
| cnv_PHYH     | 0.282494 |
| cnv_PI4KA    | 0.17285  |
| cnv_PI4KAP1  | 0.468486 |
| cnv_PI4KAP2  | 0.432099 |
| cnv_PIAS1    | 0.314749 |
| cnv_PIAS3    | 0.388428 |
| cnv_PIBF1    | 0.324622 |
| cnv_PICALM   | 0.524546 |
| cnv_PIGA     | 0.222658 |
| cnv_PIGB     | 0.433012 |
| cnv_PIGC     | 0.61073  |
| cnv_PIGH     | 0.56162  |
| cnv_PIGK     | 0.51008  |
| cnv_PIGM     | 0.541473 |
| cnv_PIGN     | 0.465801 |
| cnv_PIGP     | 0.378548 |
| cnv_PIGU     | 0.419325 |
| cnv_PIGY     | 0.392593 |
| cnv_PIK3C2A  | 0.439346 |
| cnv_PIK3CB   | 0.340013 |
| cnv_PIK3R2   | 0.324167 |
| cnv_PIKFYVE  | 0.276631 |
| cnv_PILRB    | 0.476836 |
| cnv_PIN1     | 0.511812 |
| cnv_PINK1    | 0.437863 |
| cnv_PINLYP   | 0.27431  |
| cnv_PIP4K2A  | 0.200282 |

|                |          |
|----------------|----------|
| cnv_PIP5K1A    | 0.653113 |
| cnv_PIP5K1B    | 0.333284 |
| cnv_PITPNA     | 0.566856 |
| cnv_PITPNA-AS1 | 0.261643 |
| cnv_PITPNB     | 0.520895 |
| cnv_PJA1       | 0.179371 |
| cnv_PJA2       | 0.35575  |
| cnv_PKD2       | 0.340876 |
| cnv_PKN2       | 0.517446 |
| cnv_PLA2G15    | 0.296226 |
| cnv_PLA2G4A    | 0.410914 |
| cnv_PLAA       | 0.419961 |
| cnv_PLCG2      | 0.433831 |
| cnv_PLCL2      | 0.309861 |
| cnv_PLEKHA2    | 0.492206 |
| cnv_PLGRKT     | 0.537603 |
| cnv_PLIN3      | 0.38736  |
| cnv_PLOD3      | 0.43993  |
| cnv_PLP2       | 0.222999 |
| cnv_PLXNC1     | 0.247844 |
| cnv_PMF1       | 0.482681 |
| cnv_PMM1       | 0.343883 |
| cnv_PMM2       | 0.526186 |
| cnv_PMS2P1     | 0.605188 |
| cnv_PMS2P5     | 0.412444 |
| cnv_PMVK       | 0.594099 |
| cnv_PNISR      | 0.537339 |
| cnv_PNKP       | 0.424849 |
| cnv_PNMA1      | 0.303656 |
| cnv_PNN        | 0.49157  |
| cnv_PNOC       | 0.526685 |
| cnv_PNPO       | 0.383566 |
| cnv_PNRC1      | 0.490963 |
| cnv_POC5       | 0.423596 |
| cnv_POGK       | 0.606553 |
| cnv_POGLUT1    | 0.446959 |
| cnv_POGZ       | 0.372451 |
| cnv_POLB       | 0.408744 |
| cnv_POLD2      | 0.54001  |
| cnv_POLDIP2    | 0.378471 |
| cnv_POLE3      | 0.320431 |
| cnv_POLK       | 0.393987 |
| cnv_POLM       | 0.415207 |
| cnv_POLR1C     | 0.355107 |
| cnv_POLR1D     | 0.640403 |
| cnv_POLR2G     | 0.507722 |
| cnv_POLR2H     | 0.511579 |

|              |          |
|--------------|----------|
| cnv_POLR2I   | 0.300398 |
| cnv_POLR2J   | 0.485981 |
| cnv_POLR2J2  | 0.385595 |
| cnv_POLR2J3  | 0.377797 |
| cnv_POLR2K   | 0.4765   |
| cnv_POLR2M   | 0.552619 |
| cnv_POLR3C   | 0.486996 |
| cnv_POLR3D   | 0.316964 |
| cnv_POLR3GL  | 0.359483 |
| cnv_POM121C  | 0.5096   |
| cnv_POMP     | 0.42938  |
| cnv_POMZP3   | 0.293538 |
| cnv_POP5     | 0.436911 |
| cnv_POP7     | 0.400331 |
| cnv_POR      | 0.299284 |
| cnv_POT1     | 0.34549  |
| cnv_POU2F2   | 0.283702 |
| cnv_PP7080   | 0.305009 |
| cnv_PPBP     | 0.247986 |
| cnv_PPCDC    | 0.58658  |
| cnv_PPFA1    | 0.569648 |
| cnv_PPFIBP2  | 0.280026 |
| cnv_PPIA     | 0.543454 |
| cnv_PPIG     | 0.364268 |
| cnv_PPIL1    | 0.27971  |
| cnv_PPIL4    | 0.476031 |
| cnv_PPIP5K1  | 0.352254 |
| cnv_PPIP5K2  | 0.334005 |
| cnv_PPM1A    | 0.566517 |
| cnv_PPM1K    | 0.493529 |
| cnv_PPM1M    | 0.251927 |
| cnv_PPOX     | 0.47068  |
| cnv_PPP1CA   | 0.32415  |
| cnv_PPP1CB   | 0.352204 |
| cnv_PPP1R12A | 0.300417 |
| cnv_PPP1R14D | 0.311068 |
| cnv_PPP1R15B | 0.458666 |
| cnv_PPP1R18  | 0.266862 |
| cnv_PPP1R21  | 0.24943  |
| cnv_PPP1R35  | 0.550003 |
| cnv_PPP1R3E  | 0.372511 |
| cnv_PPP1R8   | 0.284219 |
| cnv_PPP2CA   | 0.408888 |
| cnv_PPP2R1B  | 0.605833 |
| cnv_PPP2R5C  | 0.572661 |
| cnv_PPP2R5E  | 0.541889 |
| cnv_PPP3CA   | 0.279141 |

|              |          |
|--------------|----------|
| cnv_PPP3R1   | 0.260904 |
| cnv_PPP4C    | 0.636869 |
| cnv_PPP4R1   | 0.307358 |
| cnv_PPP4R2   | 0.468283 |
| cnv_PPP6C    | 0.482692 |
| cnv_PPP6R3   | 0.522752 |
| cnv_PPTC7    | 0.325087 |
| cnv_PPWD1    | 0.325193 |
| cnv_PRADC1   | 0.22469  |
| cnv_PRCC     | 0.576589 |
| cnv_PRDM2    | 0.401678 |
| cnv_PRDM5    | 0.293625 |
| cnv_PRDX1    | 0.328246 |
| cnv_PRDX6    | 0.558298 |
| cnv_PREB     | 0.32468  |
| cnv_PRELID1  | 0.625662 |
| cnv_PRICKLE2 | 0.317601 |
| cnv_PRICKLE4 | 0.551954 |
| cnv_PRIM1    | 0.274096 |
| cnv_PRKAB2   | 0.687241 |
| cnv_PRKACB   | 0.342839 |
| cnv_PRKAR1A  | 0.22489  |
| cnv_PRKCSH   | 0.273551 |
| cnv_PRKCZ    | 0.352874 |
| cnv_PRKD2    | 0.312266 |
| cnv_PRKDC    | 0.438325 |
| cnv_PRKRA    | 0.271217 |
| cnv_PRMT3    | 0.363012 |
| cnv_PRMT7    | 0.369473 |
| cnv_PRMT9    | 0.238721 |
| cnv_PRORS1P  | 0.264752 |
| cnv_PROSC    | 0.637781 |
| cnv_PROSER1  | 0.600044 |
| cnv_PRR19    | 0.447301 |
| cnv_PRR3     | 0.390038 |
| cnv_PRR38B   | 0.521453 |
| cnv_PRR39    | 0.309882 |
| cnv_PRR4     | 0.40776  |
| cnv_PRR4B    | 0.462558 |
| cnv_PRR8     | 0.582916 |
| cnv_PRRS1    | 0.496858 |
| cnv_PRRSAP2  | 0.433325 |
| cnv_PRR13    | 0.248695 |
| cnv_PRR14    | 0.492113 |
| cnv_PRR7     | 0.449839 |
| cnv_PRR2C    | 0.492073 |
| cnv_PRRS16   | 0.301968 |

|               |          |
|---------------|----------|
| cnv_PSAP      | 0.388585 |
| cnv_PSMA1     | 0.487315 |
| cnv_PSMA2     | 0.545273 |
| cnv_PSMA4     | 0.424959 |
| cnv_PSMA6     | 0.369477 |
| cnv_PSMA7     | 0.460052 |
| cnv_PSMB10    | 0.415057 |
| cnv_PSMB3     | 0.255258 |
| cnv_PSMB4     | 0.758832 |
| cnv_PSMB6     | 0.522202 |
| cnv_PSMB7     | 0.353162 |
| cnv_PSMB8     | 0.270562 |
| cnv_PSMC1     | 0.347201 |
| cnv_PSMC3     | 0.520878 |
| cnv_PSMC3IP   | 0.315282 |
| cnv_PSMC5     | 0.346248 |
| cnv_PSMC6     | 0.415825 |
| cnv_PSMD10    | 0.438152 |
| cnv_PSMD11    | 0.298947 |
| cnv_PSMD12    | 0.221697 |
| cnv_PSMD13    | 0.486525 |
| cnv_PSMD2     | 0.407629 |
| cnv_PSMD3     | 0.352463 |
| cnv_PSMD4     | 0.799316 |
| cnv_PSMD6-AS2 | 0.275947 |
| cnv_PSMD7     | 0.511025 |
| cnv_PSMD8     | 0.277988 |
| cnv_PSME1     | 0.557235 |
| cnv_PSME3     | 0.280825 |
| cnv_PSME4     | 0.279483 |
| cnv_PSMG1     | 0.486484 |
| cnv_PSMG2     | 0.482448 |
| cnv_PSMG3     | 0.556109 |
| cnv_PSPC1     | 0.528511 |
| cnv_PTCD2     | 0.340501 |
| cnv_PTCH1     | 0.435041 |
| cnv_PTSS1     | 0.406978 |
| cnv_PTEN      | 0.303879 |
| cnv_PTGES3    | 0.404145 |
| cnv_PTGR2     | 0.560907 |
| cnv_PTK2B     | 0.438342 |
| cnv_PTP4A1    | 0.462372 |
| cnv_PTP4A2    | 0.461472 |
| cnv_PTPMT1    | 0.5542   |
| cnv_PTPN6     | 0.325616 |
| cnv_PTRH2     | 0.296798 |
| cnv_PTS       | 0.490103 |

|               |          |
|---------------|----------|
| cnv_PTTG1IP   | 0.371813 |
| cnv_PUF60     | 0.510938 |
| cnv_PURB      | 0.441272 |
| cnv_PUS3      | 0.545263 |
| cnv_PUS7      | 0.302078 |
| cnv_PUS7L     | 0.3629   |
| cnv_PWP1      | 0.352188 |
| cnv_PXK       | 0.331191 |
| cnv_PXN-AS1   | 0.33275  |
| cnv_PYCR2     | 0.554376 |
| cnv_PYROXD1   | 0.451484 |
| cnv_PYURF     | 0.392593 |
| cnv_QARS      | 0.384153 |
| cnv_QKI       | 0.606763 |
| cnv_QRSL1     | 0.442058 |
| cnv_QSER1     | 0.482205 |
| cnv_QTRT1     | 0.487985 |
| cnv_R3HCC1    | 0.626107 |
| cnv_RAB10     | 0.269414 |
| cnv_RAB11A    | 0.448157 |
| cnv_RAB11FIP1 | 0.411821 |
| cnv_RAB11FIP5 | 0.356562 |
| cnv_RAB12     | 0.400829 |
| cnv_RAB1B     | 0.42555  |
| cnv_RAB22A    | 0.279193 |
| cnv_RAB24     | 0.463403 |
| cnv_RAB27A    | 0.32139  |
| cnv_RAB28     | 0.371627 |
| cnv_RAB29     | 0.452527 |
| cnv_RAB30     | 0.366214 |
| cnv_RAB30-AS1 | 0.348132 |
| cnv_RAB33B    | 0.311294 |
| cnv_RAB39B    | 0.259999 |
| cnv_RAB3B     | 0.283102 |
| cnv_RAB3GAP2  | 0.690601 |
| cnv_RAB4A     | 0.484465 |
| cnv_RAB5B     | 0.377696 |
| cnv_RAB8A     | 0.278386 |
| cnv_RAB8B     | 0.32421  |
| cnv_RABEP1    | 0.433958 |
| cnv_RABEPK    | 0.475607 |
| cnv_RABGAP1L  | 0.424864 |
| cnv_RABIF     | 0.621411 |
| cnv_RABL3     | 0.396866 |
| cnv_RAC1      | 0.60982  |
| cnv_RAD1      | 0.440648 |
| cnv_RAD17     | 0.337348 |

|               |          |
|---------------|----------|
| cnv_RAD21     | 0.528646 |
| cnv_RAD23A    | 0.455881 |
| cnv_RAD23B    | 0.345745 |
| cnv_RAD50     | 0.366636 |
| cnv_RAD51-AS1 | 0.310053 |
| cnv_RAD51C    | 0.338923 |
| cnv_RAD9A     | 0.360815 |
| cnv_RAF1      | 0.486688 |
| cnv_RALA      | 0.447901 |
| cnv_RALBP1    | 0.503228 |
| cnv_RALGPS2   | 0.54916  |
| cnv_RALY      | 0.291042 |
| cnv_RALY-AS1  | 0.340408 |
| cnv_RANBP6    | 0.331948 |
| cnv_RANBP9    | 0.489752 |
| cnv_RAP1B     | 0.356035 |
| cnv_RAP1GAP2  | 0.198993 |
| cnv_RAP2A     | 0.292204 |
| cnv_RAP2B     | 0.181101 |
| cnv_RAP2C     | 0.503876 |
| cnv_RAPGEF1   | 0.304188 |
| cnv_RAPGEF6   | 0.337233 |
| cnv_RARS      | 0.526206 |
| cnv_RASA2     | 0.39161  |
| cnv_RASA4     | 0.383021 |
| cnv_RASA4B    | 0.377699 |
| cnv_RASSF5    | 0.456458 |
| cnv_RB1       | 0.517429 |
| cnv_RB1CC1    | 0.357595 |
| cnv_RBBP4     | 0.360643 |
| cnv_RBBP5     | 0.391444 |
| cnv_RBBP7     | 0.160558 |
| cnv_RBBP8     | 0.447137 |
| cnv_RBCK1     | 0.433273 |
| cnv_RBL2      | 0.513901 |
| cnv_RBM12B    | 0.276216 |
| cnv_RBM18     | 0.529929 |
| cnv_RBM22     | 0.573745 |
| cnv_RBM23     | 0.37634  |
| cnv_RBM25     | 0.556733 |
| cnv_RBM33     | 0.371912 |
| cnv_RBM34     | 0.62218  |
| cnv_RBM39     | 0.380106 |
| cnv_RBM41     | 0.432977 |
| cnv_RBM47     | 0.34381  |
| cnv_RBM4B     | 0.330089 |
| cnv_RBM5      | 0.366909 |



|             |          |
|-------------|----------|
| cnv_RBM6    | 0.288123 |
| cnv_RBM7    | 0.6203   |
| cnv_RBM8A   | 0.311498 |
| cnv_RBMS1   | 0.182488 |
| cnv_RBMX2   | 0.548642 |
| cnv_RBMXL1  | 0.464896 |
| cnv_RBPJ    | 0.439087 |
| cnv_RBX1    | 0.342734 |
| cnv_RC3H1   | 0.304305 |
| cnv_RC3H2   | 0.478063 |
| cnv_RCBTB2  | 0.418408 |
| cnv_RCN1    | 0.285877 |
| cnv_RCN2    | 0.471413 |
| cnv_RCOR1   | 0.471779 |
| cnv_RCOR3   | 0.621829 |
| cnv_RDX     | 0.601777 |
| cnv_REEP3   | 0.270474 |
| cnv_REEP5   | 0.517788 |
| cnv_RELA    | 0.462735 |
| cnv_RELL2   | 0.324535 |
| cnv_REPS1   | 0.659812 |
| cnv_REV3L   | 0.406797 |
| cnv_REXO2   | 0.500392 |
| cnv_RFC1    | 0.350312 |
| cnv_RFC2    | 0.327129 |
| cnv_RFC5    | 0.29304  |
| cnv_RFESD   | 0.352542 |
| cnv_RFK     | 0.284354 |
| cnv_RFWD2   | 0.670013 |
| cnv_RFX5    | 0.464747 |
| cnv_RFX7    | 0.428867 |
| cnv_RFXANK  | 0.581327 |
| cnv_RGCC    | 0.352599 |
| cnv_RGPD3   | 0.296688 |
| cnv_RGPD4   | 0.304167 |
| cnv_RHBDD2  | 0.456049 |
| cnv_RHNO1   | 0.329553 |
| cnv_RHOB    | 0.203802 |
| cnv_RHOBTB2 | 0.38197  |
| cnv_RHOG    | 0.402345 |
| cnv_RHOH    | 0.323727 |
| cnv_RIC3    | 0.313944 |
| cnv_RICTOR  | 0.309972 |
| cnv_RINT1   | 0.482923 |
| cnv_RIOK1   | 0.514869 |
| cnv_RIOK2   | 0.447351 |
| cnv_RIPK2   | 0.381544 |

|                     |          |
|---------------------|----------|
| cnv_RIT1            | 0.396725 |
| cnv_RMDN1           | 0.434622 |
| cnv_RMDN3           | 0.525337 |
| cnv_RMI2            | 0.268667 |
| cnv_RMND1           | 0.58346  |
| cnv_RNASE4          | 0.15416  |
| cnv_RNASEH1         | 0.210495 |
| cnv_RNASEK          | 0.490792 |
| cnv_RNASEK-C17orf49 | 0.407024 |
| cnv_RNF10           | 0.405375 |
| cnv_RNF11           | 0.455165 |
| cnv_RNF111          | 0.372548 |
| cnv_RNF113A         | 0.446672 |
| cnv_RNF114          | 0.505215 |
| cnv_RNF115          | 0.480303 |
| cnv_RNF123          | 0.374337 |
| cnv_RNF126          | 0.322468 |
| cnv_RNF13           | 0.407153 |
| cnv_RNF138          | 0.55554  |
| cnv_RNF139          | 0.565907 |
| cnv_RNF14           | 0.458745 |
| cnv_RNF145          | 0.350436 |
| cnv_RNF146          | 0.473684 |
| cnv_RNF168          | 0.389514 |
| cnv_RNF169          | 0.546472 |
| cnv_RNF181          | 0.257947 |
| cnv_RNF185          | 0.40811  |
| cnv_RNF19A          | 0.388623 |
| cnv_RNF20           | 0.273256 |
| cnv_RNF38           | 0.447363 |
| cnv_RNF4            | 0.369307 |
| cnv_RNF44           | 0.42857  |
| cnv_RNFT1           | 0.246126 |
| cnv_RNMT            | 0.524735 |
| cnv_RNPC3           | 0.446521 |
| cnv_RNPEP           | 0.640638 |
| cnv_ROCK2           | 0.271496 |
| cnv_ROMO1           | 0.38587  |
| cnv_RPA1            | 0.308942 |
| cnv_RPA3            | 0.468678 |
| cnv_RPAP1           | 0.363269 |
| cnv_RPAP2           | 0.454666 |
| cnv_RPL14           | 0.313419 |
| cnv_RPL15           | 0.410854 |
| cnv_RPL18A          | 0.488691 |
| cnv_RPL22L1         | 0.357874 |
| cnv_RPL26L1         | 0.307365 |

|                    |          |
|--------------------|----------|
| cnv_RPL28          | 0.416576 |
| cnv_RPL29          | 0.395876 |
| cnv_RPL36          | 0.455884 |
| cnv_RPL36A         | 0.421401 |
| cnv_RPL36A-HNRNPH2 | 0.417915 |
| cnv_RPL36AL        | 0.42813  |
| cnv_RPL37          | 0.528042 |
| cnv_RPL4           | 0.56777  |
| cnv_RPL7L1         | 0.447539 |
| cnv_RPN2           | 0.374032 |
| cnv_RPP21          | 0.599296 |
| cnv_RPP25L         | 0.590519 |
| cnv_RPP40          | 0.348806 |
| cnv_RPRD1A         | 0.521356 |
| cnv_RPRD2          | 0.592994 |
| cnv_RPS10-NUDT3    | 0.465939 |
| cnv_RPS19BP1       | 0.381282 |
| cnv_RPS23          | 0.444721 |
| cnv_RPS27L         | 0.479049 |
| cnv_RPS3           | 0.535095 |
| cnv_RPS6KA5        | 0.414241 |
| cnv_RPS6KB1        | 0.336375 |
| cnv_RPS6KC1        | 0.415319 |
| cnv_RPSA           | 0.366613 |
| cnv_RPSAP58        | 0.305843 |
| cnv_RPUSD2         | 0.31152  |
| cnv_RPUSD4         | 0.582715 |
| cnv_RRAGA          | 0.411279 |
| cnv_RRM2B          | 0.51051  |
| cnv_RRNAD1         | 0.472239 |
| cnv_RRP15          | 0.555495 |
| cnv_RRP1B          | 0.53199  |
| cnv_RSAD1          | 0.404991 |
| cnv_RSBN1          | 0.480542 |
| cnv_RSF1           | 0.588058 |
| cnv_RSL24D1        | 0.55734  |
| cnv_RSPRY1         | 0.429698 |
| cnv_RSRC1          | 0.377768 |
| cnv_RSRP1          | 0.363276 |
| cnv_RTCA           | 0.573081 |
| cnv_RTCB           | 0.476403 |
| cnv_RTN4           | 0.315185 |
| cnv_RTN4IP1        | 0.368095 |
| cnv_RUNX3          | 0.359361 |
| cnv_RUSC1          | 0.532671 |
| cnv_RUSC1-AS1      | 0.50246  |
| cnv_RUVBL1         | 0.328748 |

|                |          |
|----------------|----------|
| cnv_RWDD1      | 0.623321 |
| cnv_RWDD2A     | 0.493923 |
| cnv_RWDD2B     | 0.486619 |
| cnv_RWDD3      | 0.565062 |
| cnv_RYBP       | 0.298767 |
| cnv_S100A4     | 0.421138 |
| cnv_S100A6     | 0.341811 |
| cnv_S100PBP    | 0.286156 |
| cnv_S1PR4      | 0.261799 |
| cnv_SAAL1      | 0.514066 |
| cnv_SAC3D1     | 0.349087 |
| cnv_SACM1L     | 0.382612 |
| cnv_SAE1       | 0.316843 |
| cnv_SAMD8      | 0.315671 |
| cnv_SAP130     | 0.292109 |
| cnv_SAP18      | 0.679863 |
| cnv_SAPCD1     | 0.421133 |
| cnv_SAR1A      | 0.353378 |
| cnv_SAR1B      | 0.394324 |
| cnv_SARAF      | 0.683535 |
| cnv_SARS       | 0.490438 |
| cnv_SART3      | 0.27541  |
| cnv_SASH3      | 0.323013 |
| cnv_SAT2       | 0.647787 |
| cnv_SBDS       | 0.329575 |
| cnv_SBDSP1     | 0.275999 |
| cnv_SBF2       | 0.439417 |
| cnv_SC5D       | 0.396799 |
| cnv_SCAF11     | 0.225478 |
| cnv_SCAF4      | 0.321794 |
| cnv_SCAF8      | 0.505698 |
| cnv_SCAMP1     | 0.316629 |
| cnv_SCAMP1-AS1 | 0.406112 |
| cnv_SCAMP3     | 0.65244  |
| cnv_SCAMP5     | 0.32203  |
| cnv_SCAND1     | 0.477298 |
| cnv_SCAP       | 0.365701 |
| cnv_SCAPER     | 0.409912 |
| cnv_SCARB2     | 0.235267 |
| cnv_SCARNA15   | 0.347592 |
| cnv_SCFD1      | 0.476149 |
| cnv_SCNM1      | 0.660972 |
| cnv_SCO1       | 0.294767 |
| cnv_SCP2       | 0.326715 |
| cnv_SCRIB      | 0.462204 |
| cnv_SCRN1      | 0.237323 |
| cnv_SCYL3      | 0.573223 |

|                    |          |
|--------------------|----------|
| cnv_SDAD1          | 0.282975 |
| cnv_SDCBP          | 0.227679 |
| cnv_SDE2           | 0.576253 |
| cnv_SDF2           | 0.289153 |
| cnv_SDF2L1         | 0.309852 |
| cnv_SDF4           | 0.411837 |
| cnv_SDHA           | 0.322927 |
| cnv_SDHAF2         | 0.438993 |
| cnv_SDHC           | 0.75914  |
| cnv_SDR39U1        | 0.5828   |
| cnv_SEC11A         | 0.483324 |
| cnv_SEC11C         | 0.477838 |
| cnv_SEC13          | 0.412099 |
| cnv_SEC14L1        | 0.415557 |
| cnv_SEC14L1P1      | 0.393744 |
| cnv_SEC23A         | 0.365119 |
| cnv_SEC23B         | 0.353556 |
| cnv_SEC24A         | 0.376381 |
| cnv_SEC24B         | 0.472024 |
| cnv_SEC24C         | 0.261073 |
| cnv_SEC24D         | 0.348041 |
| cnv_SEC31A         | 0.371171 |
| cnv_SEC61A1        | 0.340217 |
| cnv_SEC61G         | 0.489372 |
| cnv_SEC63          | 0.615338 |
| cnv_SECISBP2       | 0.518138 |
| cnv_SEH1L          | 0.413107 |
| cnv_SEL1L          | 0.279088 |
| cnv_SEMA4B         | 0.246895 |
| cnv_SEMA4D         | 0.338809 |
| cnv_SENP6          | 0.513915 |
| cnv_SEPHS1         | 0.206544 |
| cnv_SEPHS2         | 0.541398 |
| cnv_SEPT6          | 0.381383 |
| cnv_SERF2-C15ORF63 | 0.491361 |
| cnv_SERINC1        | 0.655615 |
| cnv_SERINC3        | 0.536083 |
| cnv_SERP1          | 0.394277 |
| cnv_SERPINB1       | 0.261282 |
| cnv_SERPINI1       | 0.304879 |
| cnv_SET            | 0.491084 |
| cnv_SETBP1         | 0.318552 |
| cnv_SETD2          | 0.417774 |
| cnv_SETD6          | 0.349712 |
| cnv_SETD9          | 0.407454 |
| cnv_SETX           | 0.325738 |
| cnv_SF1            | 0.246474 |

|                |          |
|----------------|----------|
| cnv_SF3A3      | 0.346976 |
| cnv_SF3B1      | 0.414871 |
| cnv_SF3B4      | 0.623494 |
| cnv_SF3B5      | 0.545359 |
| cnv_SFR1       | 0.268195 |
| cnv_SFT2D2     | 0.549595 |
| cnv_SFXN1      | 0.360015 |
| cnv_SGK3       | 0.370207 |
| cnv_SH3BGRL    | 0.140954 |
| cnv_SH3BGRL3   | 0.371908 |
| cnv_SH3BP5-AS1 | 0.347564 |
| cnv_SH3GLB1    | 0.723547 |
| cnv_SH3TC1     | 0.19528  |
| cnv_SHC1       | 0.511619 |
| cnv_SHISA2     | 0.300307 |
| cnv_SHISA5     | 0.381583 |
| cnv_SHOC2      | 0.307809 |
| cnv_SHPRH      | 0.4686   |
| cnv_SHQ1       | 0.379714 |
| cnv_SIAH1      | 0.450939 |
| cnv_SIDT1      | 0.309307 |
| cnv_SIDT2      | 0.390332 |
| cnv_SIGMAR1    | 0.427114 |
| cnv_SIK3       | 0.601449 |
| cnv_SIKE1      | 0.315557 |
| cnv_SIL1       | 0.401393 |
| cnv_SIPA1      | 0.293147 |
| cnv_SIVA1      | 0.30341  |
| cnv_SKA2       | 0.258165 |
| cnv_SKIV2L2    | 0.476934 |
| cnv_SKP1       | 0.432378 |
| cnv_SKP2       | 0.383983 |
| cnv_SLAIN1     | 0.304154 |
| cnv_SLAIN2     | 0.442139 |
| cnv_SLBP       | 0.24795  |
| cnv_SLC10A3    | 0.532254 |
| cnv_SLC12A9    | 0.482189 |
| cnv_SLC17A5    | 0.379454 |
| cnv_SLC18B1    | 0.481933 |
| cnv_SLC19A2    | 0.53099  |
| cnv_SLC1A4     | 0.240357 |
| cnv_SLC25A1    | 0.375111 |
| cnv_SLC25A11   | 0.369108 |
| cnv_SLC25A14   | 0.595147 |
| cnv_SLC25A19   | 0.319483 |
| cnv_SLC25A23   | 0.360499 |
| cnv_SLC25A26   | 0.390133 |

|              |          |
|--------------|----------|
| cnv_SLC25A32 | 0.523415 |
| cnv_SLC25A37 | 0.423514 |
| cnv_SLC25A38 | 0.421674 |
| cnv_SLC25A39 | 0.312451 |
| cnv_SLC25A40 | 0.376378 |
| cnv_SLC25A43 | 0.2712   |
| cnv_SLC25A44 | 0.533325 |
| cnv_SLC25A45 | 0.44273  |
| cnv_SLC25A46 | 0.390388 |
| cnv_SLC25A5  | 0.426557 |
| cnv_SLC2A11  | 0.349083 |
| cnv_SLC30A7  | 0.571799 |
| cnv_SLC30A9  | 0.323054 |
| cnv_SLC31A1  | 0.282827 |
| cnv_SLC31A2  | 0.304276 |
| cnv_SLC35A1  | 0.459941 |
| cnv_SLC35A3  | 0.528498 |
| cnv_SLC35A4  | 0.424547 |
| cnv_SLC35A5  | 0.408631 |
| cnv_SLC35B1  | 0.302144 |
| cnv_SLC35B2  | 0.454904 |
| cnv_SLC35B3  | 0.4744   |
| cnv_SLC35B4  | 0.424137 |
| cnv_SLC35D1  | 0.333769 |
| cnv_SLC35F2  | 0.561713 |
| cnv_SLC37A3  | 0.308723 |
| cnv_SLC38A9  | 0.427019 |
| cnv_SLC39A1  | 0.364516 |
| cnv_SLC39A11 | 0.280419 |
| cnv_SLC39A14 | 0.359275 |
| cnv_SLC39A4  | 0.396549 |
| cnv_SLC39A6  | 0.534902 |
| cnv_SLC39A7  | 0.403861 |
| cnv_SLC39A8  | 0.370704 |
| cnv_SLC40A1  | 0.31163  |
| cnv_SLC41A1  | 0.4179   |
| cnv_SLC41A2  | 0.253939 |
| cnv_SLC41A3  | 0.539935 |
| cnv_SLC46A3  | 0.378296 |
| cnv_SLC4A2   | 0.28298  |
| cnv_SLC50A1  | 0.437573 |
| cnv_SLC7A1   | 0.429942 |
| cnv_SLC7A5   | 0.295769 |
| cnv_SLC7A6   | 0.459546 |
| cnv_SLC7A6OS | 0.368834 |
| cnv_SLC7A7   | 0.19164  |
| cnv_SLC9A6   | 0.531888 |

|              |          |
|--------------|----------|
| cnv_SLC9A8   | 0.335691 |
| cnv_SLIRP    | 0.508445 |
| cnv_SLK      | 0.345525 |
| cnv_SLTM     | 0.525633 |
| cnv_SLU7     | 0.507287 |
| cnv_SLX4IP   | 0.285181 |
| cnv_SMA4     | 0.297147 |
| cnv_SMAD2    | 0.676951 |
| cnv_SMAD5    | 0.267732 |
| cnv_SMAP1    | 0.630446 |
| cnv_SMARCA5  | 0.364419 |
| cnv_SMARCC1  | 0.264489 |
| cnv_SMC5     | 0.336554 |
| cnv_SMC6     | 0.214968 |
| cnv_SMCHD1   | 0.465749 |
| cnv_SMG1     | 0.401256 |
| cnv_SMG1P2   | 0.444425 |
| cnv_SMG1P5   | 0.417824 |
| cnv_SMG7     | 0.46627  |
| cnv_SMG8     | 0.257276 |
| cnv_SMIM13   | 0.369801 |
| cnv_SMIM15   | 0.30697  |
| cnv_SMIM19   | 0.511275 |
| cnv_SMIM20   | 0.421637 |
| cnv_SMPD4    | 0.394998 |
| cnv_SNAP23   | 0.410062 |
| cnv_SNAP29   | 0.123209 |
| cnv_SNAP47   | 0.645183 |
| cnv_SNAPC1   | 0.337177 |
| cnv_SNAPC3   | 0.316868 |
| cnv_SNAPIN   | 0.695862 |
| cnv_SNF8     | 0.542477 |
| cnv_SNHG1    | 0.360378 |
| cnv_SNHG15   | 0.486477 |
| cnv_SNHG9    | 0.410917 |
| cnv_SNORA1   | 0.624193 |
| cnv_SNORA11D | 0.134954 |
| cnv_SNORA11E | 0.15239  |
| cnv_SNORA18  | 0.624193 |
| cnv_SNORA28  | 0.477033 |
| cnv_SNORA29  | 0.57213  |
| cnv_SNORA32  | 0.624193 |
| cnv_SNORA4   | 0.289148 |
| cnv_SNORA40  | 0.624193 |
| cnv_SNORA56  | 0.443162 |
| cnv_SNORA5B  | 0.543743 |
| cnv_SNORA6   | 0.366613 |



|              |          |
|--------------|----------|
| cnv_SNORA62  | 0.366613 |
| cnv_SNORA63  | 0.289148 |
| cnv_SNORA72  | 0.31967  |
| cnv_SNORA78  | 0.409387 |
| cnv_SNORA8   | 0.624193 |
| cnv_SNORA81  | 0.289148 |
| cnv_SNORA9   | 0.486477 |
| cnv_SNORD16  | 0.56777  |
| cnv_SNORD18A | 0.56777  |
| cnv_SNORD18B | 0.56777  |
| cnv_SNORD18C | 0.56777  |
| cnv_SNORD19B | 0.386934 |
| cnv_SNORD2   | 0.289148 |
| cnv_SNORD22  | 0.360378 |
| cnv_SNORD23  | 0.400264 |
| cnv_SNORD25  | 0.360378 |
| cnv_SNORD26  | 0.360378 |
| cnv_SNORD27  | 0.360378 |
| cnv_SNORD28  | 0.360378 |
| cnv_SNORD29  | 0.360378 |
| cnv_SNORD30  | 0.360378 |
| cnv_SNORD31  | 0.360378 |
| cnv_SNORD44  | 0.359526 |
| cnv_SNORD47  | 0.359526 |
| cnv_SNORD5   | 0.624193 |
| cnv_SNORD50A | 0.346822 |
| cnv_SNORD50B | 0.346822 |
| cnv_SNORD74  | 0.359526 |
| cnv_SNORD76  | 0.359526 |
| cnv_SNORD77  | 0.359526 |
| cnv_SNORD79  | 0.359526 |
| cnv_SNORD80  | 0.359526 |
| cnv_SNORD81  | 0.359526 |
| cnv_SNORD84  | 0.376443 |
| cnv_SNORD88C | 0.344671 |
| cnv_SNRNP25  | 0.318389 |
| cnv_SNRNP27  | 0.260767 |
| cnv_SNRNP48  | 0.282275 |
| cnv_SNRNP70  | 0.474481 |
| cnv_SNRPD1   | 0.462339 |
| cnv_SNRPD2   | 0.328864 |
| cnv_SNRPD3   | 0.459148 |
| cnv_SNRPE    | 0.552563 |
| cnv_SNUPN    | 0.53317  |
| cnv_SNURF    | 0.383046 |
| cnv_SNW1     | 0.551538 |
| cnv_SNX1     | 0.513548 |

|               |          |
|---------------|----------|
| cnv_SNX13     | 0.353853 |
| cnv_SNX14     | 0.466981 |
| cnv_SNX27     | 0.446815 |
| cnv_SNX3      | 0.71046  |
| cnv_SNX4      | 0.236738 |
| cnv_SNX6      | 0.399506 |
| cnv_SOAT1     | 0.298934 |
| cnv_SOCS4     | 0.421058 |
| cnv_SOCS5     | 0.260956 |
| cnv_SOD1      | 0.42359  |
| cnv_SOD2      | 0.514583 |
| cnv_SON       | 0.566596 |
| cnv_SORD      | 0.392298 |
| cnv_SORT1     | 0.324387 |
| cnv_SP1       | 0.253953 |
| cnv_SP4       | 0.267661 |
| cnv_SPAG5-AS1 | 0.27047  |
| cnv_SPAG7     | 0.503242 |
| cnv_SPAG9     | 0.373996 |
| cnv_SPATA5L1  | 0.41413  |
| cnv_SPCS2     | 0.385704 |
| cnv_SPECC1L   | 0.423241 |
| cnv_SPEF2     | 0.37417  |
| cnv_SPG20     | 0.368064 |
| cnv_SPHAR     | 0.484465 |
| cnv_SPINK2    | 0.210217 |
| cnv_SPINT1    | 0.347749 |
| cnv_SPOP      | 0.279257 |
| cnv_SPRY1     | 0.300574 |
| cnv_SPRYD3    | 0.318747 |
| cnv_SPSB2     | 0.328191 |
| cnv_SPTY2D1   | 0.40634  |
| cnv_SQLE      | 0.48382  |
| cnv_SQRDL     | 0.549538 |
| cnv_SQSTM1    | 0.306905 |
| cnv_SRA1      | 0.621915 |
| cnv_SREK1     | 0.429135 |
| cnv_SREK1IP1  | 0.391285 |
| cnv_SRGA2     | 0.328578 |
| cnv_SRGA2C    | 0.195071 |
| cnv_SRGN      | 0.260767 |
| cnv_SRI       | 0.274373 |
| cnv_SRP14     | 0.27803  |
| cnv_SRP19     | 0.433239 |
| cnv_SRP54     | 0.361094 |
| cnv_SRP68     | 0.457958 |
| cnv_SRP72     | 0.354471 |

|                            |          |
|----------------------------|----------|
| cnv_SRP9                   | 0.439601 |
| cnv_SRPK1                  | 0.385441 |
| cnv_SRPK2                  | 0.419745 |
| cnv_SRPRB                  | 0.419981 |
| cnv_SRRD                   | 0.413308 |
| cnv_SRRM1                  | 0.330941 |
| cnv_SRSF11                 | 0.581374 |
| cnv_SRSF3                  | 0.338753 |
| cnv_SRSF4                  | 0.32475  |
| cnv_SRSF5                  | 0.639305 |
| cnv_SRSF7                  | 0.301763 |
| cnv_SRSF8                  | 0.423345 |
| cnv_SRSF9                  | 0.58159  |
| cnv_SS18                   | 0.474939 |
| cnv_SS18L1                 | 0.369809 |
| cnv_SS18L2                 | 0.410248 |
| cnv_SSB                    | 0.320812 |
| cnv_SSBP1                  | 0.432236 |
| cnv_SSBP3                  | 0.358931 |
| cnv_SSBP4                  | 0.404324 |
| cnv_SSFA2                  | 0.24164  |
| cnv_SSR1                   | 0.526048 |
| cnv_SSR2                   | 0.489572 |
| cnv_SSR3                   | 0.415778 |
| cnv_SSR4                   | 0.238263 |
| cnv_SSRP1                  | 0.398988 |
| cnv_SSSCA1                 | 0.491263 |
| cnv_ST3GAL1                | 0.396851 |
| cnv_ST7                    | 0.554954 |
| cnv_ST7-OT3                | 0.507997 |
| cnv_ST8SIA4                | 0.407467 |
| cnv_STAG1                  | 0.252818 |
| cnv_STAG2                  | 0.503269 |
| cnv_STAG3L1                | 0.381504 |
| cnv_STAG3L2                | 0.356313 |
| cnv_STAG3L3                | 0.360596 |
| cnv_STAG3L4                | 0.54823  |
| cnv_STAG3L5P-PVRIG2P-PILRB | 0.476836 |
| cnv_STAM                   | 0.255207 |
| cnv_STAP2                  | 0.309409 |
| cnv_STARD3NL               | 0.339006 |
| cnv_STARD5                 | 0.357124 |
| cnv_STARD9                 | 0.333576 |
| cnv_STAT2                  | 0.36607  |
| cnv_STEAP1B                | 0.388038 |
| cnv_STIM2                  | 0.445773 |
| cnv_STIP1                  | 0.331013 |

|                   |          |
|-------------------|----------|
| cnv_STK10         | 0.303857 |
| cnv_STK17B        | 0.297388 |
| cnv_STK25         | 0.314501 |
| cnv_STK4          | 0.28517  |
| cnv_STOM          | 0.302572 |
| cnv_STOML2        | 0.457447 |
| cnv_STRAP         | 0.495788 |
| cnv_STRIP1        | 0.400824 |
| cnv_STRN3         | 0.338755 |
| cnv_STT3B         | 0.203656 |
| cnv_STX10         | 0.411049 |
| cnv_STX11         | 0.38235  |
| cnv_STX16         | 0.368571 |
| cnv_STX17         | 0.517143 |
| cnv_STX5          | 0.287381 |
| cnv_STX7          | 0.486685 |
| cnv_STXBP3        | 0.415501 |
| cnv_SUB1          | 0.304727 |
| cnv_SUCLA2        | 0.348553 |
| cnv_SUCLG2        | 0.292203 |
| cnv_SUCO          | 0.375962 |
| cnv_SUDS3         | 0.28518  |
| cnv_SUGT1         | 0.598944 |
| cnv_SUMF2         | 0.355163 |
| cnv_SUMO1         | 0.229873 |
| cnv_SUN2          | 0.17171  |
| cnv_SUPT16H       | 0.44365  |
| cnv_SURF2         | 0.293308 |
| cnv_SURF4         | 0.3182   |
| cnv_SVIP          | 0.360227 |
| cnv_SWSAP1        | 0.325058 |
| cnv_SWT1          | 0.458292 |
| cnv_SYAP1         | 0.345033 |
| cnv_SYNCRIP       | 0.487385 |
| cnv_SYNE2         | 0.303321 |
| cnv_SYNGR2        | 0.266078 |
| cnv_SYNJ2BP       | 0.509526 |
| cnv_SYNJ2BP-COX16 | 0.532026 |
| cnv_SYTL1         | 0.29856  |
| cnv_SYVN1         | 0.295562 |
| cnv_TAB2          | 0.452192 |
| cnv_TACC1         | 0.361534 |
| cnv_TAF11         | 0.407816 |
| cnv_TAF12         | 0.357451 |
| cnv_TAF13         | 0.350918 |
| cnv_TAF1A         | 0.484503 |
| cnv_TAF1A-AS1     | 0.393167 |

|              |          |
|--------------|----------|
| cnv_TAF1D    | 0.60696  |
| cnv_TAF2     | 0.597471 |
| cnv_TAF6     | 0.300851 |
| cnv_TAF7     | 0.416078 |
| cnv_TAF9     | 0.392725 |
| cnv_TAGAP    | 0.30368  |
| cnv_TAGLN2   | 0.545521 |
| cnv_TALDO1   | 0.285688 |
| cnv_TANGO2   | 0.380256 |
| cnv_TANK     | 0.26039  |
| cnv_TAP1     | 0.303173 |
| cnv_TAP2     | 0.36378  |
| cnv_TAPBP    | 0.263581 |
| cnv_TAPBPL   | 0.356445 |
| cnv_TARBP1   | 0.366395 |
| cnv_TARDBP   | 0.247535 |
| cnv_TARS2    | 0.756168 |
| cnv_TATDN3   | 0.55175  |
| cnv_TAX1BP1  | 0.427301 |
| cnv_TAX1BP3  | 0.427453 |
| cnv_TBC1D1   | 0.302219 |
| cnv_TBC1D10B | 0.396232 |
| cnv_TBC1D15  | 0.320687 |
| cnv_TBC1D23  | 0.241854 |
| cnv_TBC1D3   | 0.261712 |
| cnv_TBC1D30  | 0.229032 |
| cnv_TBC1D3C  | 0.274911 |
| cnv_TBC1D3H  | 0.24173  |
| cnv_TBC1D9   | 0.311759 |
| cnv_TBCA     | 0.454892 |
| cnv_TBCC     | 0.345252 |
| cnv_TBCCD1   | 0.396794 |
| cnv_TBCE     | 0.695041 |
| cnv_TBCEL    | 0.379389 |
| cnv_TBCK     | 0.284376 |
| cnv_TBK1     | 0.217339 |
| cnv_TBPL1    | 0.57677  |
| cnv_TCEAL1   | 0.414287 |
| cnv_TCEAL3   | 0.326201 |
| cnv_TCEAL4   | 0.315241 |
| cnv_TCEAL8   | 0.343213 |
| cnv_TCERG1   | 0.282544 |
| cnv_TCF12    | 0.467349 |
| cnv_TCFL5    | 0.291054 |
| cnv_TCN2     | 0.29326  |
| cnv_TCP1     | 0.57213  |
| cnv_TCTN1    | 0.336786 |

|                    |          |
|--------------------|----------|
| cnv_TDG            | 0.276922 |
| cnv_TDP2           | 0.332261 |
| cnv_TDRD3          | 0.493152 |
| cnv_TDRD7          | 0.423468 |
| cnv_TEKT4P2        | 0.25333  |
| cnv_TERF1          | 0.452328 |
| cnv_TERF2IP        | 0.643455 |
| cnv_TESK2          | 0.435657 |
| cnv_TET1           | 0.187053 |
| cnv_TET2           | 0.332838 |
| cnv_TEX10          | 0.55232  |
| cnv_TEX30          | 0.222113 |
| cnv_TFDP2          | 0.423692 |
| cnv_TFG            | 0.38358  |
| cnv_TFPT           | 0.386678 |
| cnv_TFRC           | 0.385332 |
| cnv_TGDS           | 0.579774 |
| cnv_TGIF2-C20orf24 | 0.466394 |
| cnv_TGOLN2         | 0.310617 |
| cnv_THAP1          | 0.322273 |
| cnv_THAP7          | 0.193288 |
| cnv_THEM4          | 0.560171 |
| cnv_THEMIS2        | 0.283619 |
| cnv_THG1L          | 0.605267 |
| cnv_THOC1          | 0.477594 |
| cnv_THOC2          | 0.483059 |
| cnv_THOC7          | 0.452046 |
| cnv_THOP1          | 0.304843 |
| cnv_THRIL          | 0.261404 |
| cnv_THSD1          | 0.46788  |
| cnv_THTPA          | 0.355325 |
| cnv_THUMPD1        | 0.477103 |
| cnv_THUMPD3        | 0.390508 |
| cnv_THYN1          | 0.5092   |
| cnv_TICAM2         | 0.363897 |
| cnv_TIFA           | 0.334874 |
| cnv_TIMELESS       | 0.327821 |
| cnv_TIMM10         | 0.452909 |
| cnv_TIMM10B        | 0.58286  |
| cnv_TIMM17A        | 0.659246 |
| cnv_TIMM21         | 0.456114 |
| cnv_TIMM23B        | 0.336932 |
| cnv_TIMM44         | 0.441368 |
| cnv_TIMM8B         | 0.557607 |
| cnv_TIMM9          | 0.575608 |
| cnv_TIMMDC1        | 0.365475 |
| cnv_TIPIN          | 0.329517 |

|                  |          |
|------------------|----------|
| cnv_TIPRL        | 0.609536 |
| cnv_TK1          | 0.245805 |
| cnv_TKT          | 0.325789 |
| cnv_TLR1         | 0.367891 |
| cnv_TLR6         | 0.392909 |
| cnv_TM2D1        | 0.534714 |
| cnv_TM2D2        | 0.481067 |
| cnv_TM7SF2       | 0.312034 |
| cnv_TM9SF2       | 0.584199 |
| cnv_TM9SF4       | 0.340217 |
| cnv_TMBIM1       | 0.255172 |
| cnv_TMBIM6       | 0.438407 |
| cnv_TMCO1        | 0.611574 |
| cnv_TMCO6        | 0.388931 |
| cnv_TMED10       | 0.571243 |
| cnv_TMED2        | 0.478469 |
| cnv_TMED5        | 0.671399 |
| cnv_TMED9        | 0.312111 |
| cnv_TMEM106B     | 0.457525 |
| cnv_TMEM107      | 0.314647 |
| cnv_TMEM115      | 0.261246 |
| cnv_TMEM120A     | 0.360304 |
| cnv_TMEM123      | 0.687589 |
| cnv_TMEM126A     | 0.619491 |
| cnv_TMEM128      | 0.290256 |
| cnv_TMEM133      | 0.506902 |
| cnv_TMEM138      | 0.547408 |
| cnv_TMEM147      | 0.252064 |
| cnv_TMEM14A      | 0.382534 |
| cnv_TMEM14B      | 0.626498 |
| cnv_TMEM14C      | 0.510286 |
| cnv_TMEM161B     | 0.635751 |
| cnv_TMEM161B-AS1 | 0.474303 |
| cnv_TMEM167A     | 0.37781  |
| cnv_TMEM167B     | 0.579349 |
| cnv_TMEM179B     | 0.335739 |
| cnv_TMEM181      | 0.586451 |
| cnv_TMEM183A     | 0.642249 |
| cnv_TMEM185A     | 0.565076 |
| cnv_TMEM185B     | 0.270741 |
| cnv_TMEM187      | 0.491162 |
| cnv_TMEM192      | 0.40862  |
| cnv_TMEM2        | 0.253077 |
| cnv_TMEM208      | 0.523031 |
| cnv_TMEM209      | 0.439699 |
| cnv_TMEM214      | 0.350064 |
| cnv_TMEM216      | 0.487499 |

|                     |          |
|---------------------|----------|
| cnv_TMEM220         | 0.289804 |
| cnv_TMEM230         | 0.498344 |
| cnv_TMEM243         | 0.33919  |
| cnv_TMEM245         | 0.349952 |
| cnv_TMEM248         | 0.461491 |
| cnv_TMEM251         | 0.37745  |
| cnv_TMEM254         | 0.228941 |
| cnv_TMEM256         | 0.405884 |
| cnv_TMEM260         | 0.565068 |
| cnv_TMEM261         | 0.449045 |
| cnv_TMEM30A         | 0.553528 |
| cnv_TMEM41A         | 0.401836 |
| cnv_TMEM41B         | 0.365437 |
| cnv_TMEM42          | 0.352903 |
| cnv_TMEM44-AS1      | 0.346878 |
| cnv_TMEM5           | 0.40004  |
| cnv_TMEM50A         | 0.396944 |
| cnv_TMEM50B         | 0.294127 |
| cnv_TMEM55A         | 0.307268 |
| cnv_TMEM55B         | 0.513279 |
| cnv_TMEM59          | 0.441741 |
| cnv_TMEM60          | 0.299603 |
| cnv_TMEM64          | 0.380844 |
| cnv_TMEM68          | 0.376769 |
| cnv_TMEM87B         | 0.371055 |
| cnv_TMEM9           | 0.629921 |
| cnv_TMEM9B          | 0.347245 |
| cnv_TMF1            | 0.334649 |
| cnv_TMOD3           | 0.303051 |
| cnv_TMPO            | 0.274279 |
| cnv_TMPPE           | 0.408391 |
| cnv_TMSB15A         | 0.198783 |
| cnv_TMTC4           | 0.431278 |
| cnv_TMUB1           | 0.172983 |
| cnv_TMX1            | 0.380985 |
| cnv_TMX2            | 0.48409  |
| cnv_TMX3            | 0.481789 |
| cnv_TMX4            | 0.213528 |
| cnv_TNFAIP8L2-SCNM1 | 0.660972 |
| cnv_TNFRSF10A       | 0.390586 |
| cnv_TNFRSF10D       | 0.349313 |
| cnv_TNFSF13         | 0.243068 |
| cnv_TNKS2           | 0.314776 |
| cnv_TNPO3           | 0.542149 |
| cnv_TNRC6B          | 0.414042 |
| cnv_TOMM20          | 0.523069 |
| cnv_TOMM34          | 0.447531 |



|                |          |
|----------------|----------|
| cnv_TOMM40L    | 0.48783  |
| cnv_TOMM5      | 0.565384 |
| cnv_TOMM6      | 0.551954 |
| cnv_TOMM7      | 0.57086  |
| cnv_TOP1       | 0.275301 |
| cnv_TOP2B      | 0.28659  |
| cnv_TOPBP1     | 0.356203 |
| cnv_TOPORS     | 0.337368 |
| cnv_TOPORS-AS1 | 0.413644 |
| cnv_TOR1AIP1   | 0.529461 |
| cnv_TOR1B      | 0.429112 |
| cnv_TOR3A      | 0.48852  |
| cnv_TP53       | 0.310123 |
| cnv_TP53BP2    | 0.488404 |
| cnv_TP53TG1    | 0.462592 |
| cnv_TP73-AS1   | 0.200078 |
| cnv_TPD52      | 0.321492 |
| cnv_TPK1       | 0.459304 |
| cnv_TPM4       | 0.422102 |
| cnv_TPP2       | 0.442423 |
| cnv_TPR        | 0.536626 |
| cnv_TPRG1L     | 0.502653 |
| cnv_TRA2B      | 0.287828 |
| cnv_TRAF6      | 0.45588  |
| cnv_TRAK2      | 0.252399 |
| cnv_TRAM1      | 0.330787 |
| cnv_TRAM2-AS1  | 0.279052 |
| cnv_TRAPPC1    | 0.44592  |
| cnv_TRAPPC10   | 0.419296 |
| cnv_TRAPPC4    | 0.411068 |
| cnv_TRAPPC5    | 0.314272 |
| cnv_TRAPPC6B   | 0.405542 |
| cnv_TRAPPC8    | 0.515252 |
| cnv_TRIM13     | 0.508376 |
| cnv_TRIM21     | 0.384184 |
| cnv_TRIM22     | 0.328314 |
| cnv_TRIM24     | 0.326587 |
| cnv_TRIM27     | 0.403908 |
| cnv_TRIM28     | 0.279836 |
| cnv_TRIM33     | 0.623684 |
| cnv_TRIM37     | 0.465133 |
| cnv_TRIM38     | 0.311173 |
| cnv_TRIM44     | 0.492457 |
| cnv_TRIM56     | 0.304043 |
| cnv_TRIM68     | 0.378048 |
| cnv_TRIM69     | 0.426797 |
| cnv_TRIP11     | 0.435866 |

|             |          |
|-------------|----------|
| cnv_TRIP4   | 0.409683 |
| cnv_TRIP6   | 0.3724   |
| cnv_TRMT10C | 0.355875 |
| cnv_TRMT11  | 0.601327 |
| cnv_TRMT112 | 0.529754 |
| cnv_TRMT12  | 0.493525 |
| cnv_TRMT13  | 0.347155 |
| cnv_TRMT1L  | 0.422079 |
| cnv_TRMT2B  | 0.424473 |
| cnv_TRMT6   | 0.369694 |
| cnv_TRNT1   | 0.381498 |
| cnv_TROVE2  | 0.704791 |
| cnv_TRRAP   | 0.336316 |
| cnv_TRUB2   | 0.403999 |
| cnv_TSC1    | 0.264602 |
| cnv_TSEN15  | 0.656561 |
| cnv_TSEN34  | 0.364288 |
| cnv_TSG101  | 0.562698 |
| cnv_TSHZ1   | 0.435411 |
| cnv_TSN     | 0.310193 |
| cnv_TSNAX   | 0.580305 |
| cnv_TSPAN31 | 0.373897 |
| cnv_TSPO    | 0.38816  |
| cnv_TSPYL4  | 0.329754 |
| cnv_TSTA3   | 0.320966 |
| cnv_TSTD1   | 0.543344 |
| cnv_TTC1    | 0.479706 |
| cnv_TTC13   | 0.589144 |
| cnv_TTC14   | 0.298441 |
| cnv_TTC19   | 0.556481 |
| cnv_TTC3    | 0.297213 |
| cnv_TTC37   | 0.503433 |
| cnv_TTC4    | 0.325899 |
| cnv_TTC8    | 0.335566 |
| cnv_TTC9C   | 0.537098 |
| cnv_TTF1    | 0.365011 |
| cnv_TTI1    | 0.470174 |
| cnv_TTI2    | 0.378239 |
| cnv_TTLL7   | 0.421394 |
| cnv_TTPAL   | 0.417476 |
| cnv_TUBA1A  | 0.164901 |
| cnv_TUBA1B  | 0.354631 |
| cnv_TUBA1C  | 0.369749 |
| cnv_TUBD1   | 0.243227 |
| cnv_TUBG1   | 0.262541 |
| cnv_TUBGCP4 | 0.559218 |
| cnv_TUBGCP5 | 0.422197 |

|                  |          |
|------------------|----------|
| cnv_TVP23B       | 0.34851  |
| cnv_TVP23C       | 0.323786 |
| cnv_TVP23C-CDRT4 | 0.298201 |
| cnv_TWISTNB      | 0.354166 |
| cnv_TWSG1        | 0.384526 |
| cnv_TXLNG        | 0.370869 |
| cnv_TXN          | 0.547633 |
| cnv_TXNDC11      | 0.313211 |
| cnv_TXNDC12      | 0.471634 |
| cnv_TXNDC15      | 0.543489 |
| cnv_TXNL1        | 0.552293 |
| cnv_TYW1         | 0.497737 |
| cnv_TYW3         | 0.42114  |
| cnv_U2AF1        | 0.399404 |
| cnv_U2AF1L4      | 0.293943 |
| cnv_U2SURP       | 0.318518 |
| cnv_UAP1         | 0.602743 |
| cnv_UBA2         | 0.248508 |
| cnv_UBA3         | 0.372922 |
| cnv_UBA5         | 0.485327 |
| cnv_UBA6         | 0.271961 |
| cnv_UBA7         | 0.302292 |
| cnv_UBAC2        | 0.437898 |
| cnv_UBAP2        | 0.422019 |
| cnv_UBB          | 0.394249 |
| cnv_UBE2A        | 0.509886 |
| cnv_UBE2D2       | 0.295266 |
| cnv_UBE2E1       | 0.210575 |
| cnv_UBE2E2       | 0.341    |
| cnv_UBE2G1       | 0.327135 |
| cnv_UBE2J1       | 0.410941 |
| cnv_UBE2K        | 0.374611 |
| cnv_UBE2L6       | 0.460022 |
| cnv_UBE2M        | 0.271711 |
| cnv_UBE2Q2       | 0.616212 |
| cnv_UBE2R2       | 0.406845 |
| cnv_UBE2T        | 0.493975 |
| cnv_UBE4A        | 0.55633  |
| cnv_UBFD1        | 0.449036 |
| cnv_UBL3         | 0.451091 |
| cnv_UBL4A        | 0.459024 |
| cnv_UBL5         | 0.508151 |
| cnv_UBL7         | 0.595116 |
| cnv_UBL7-AS1     | 0.379843 |
| cnv_UBLCP1       | 0.448382 |
| cnv_UBP1         | 0.508798 |
| cnv_UBQLN1       | 0.320182 |

|                  |          |
|------------------|----------|
| cnv_UBQLN2       | 0.2922   |
| cnv_UBR1         | 0.428471 |
| cnv_UBR5         | 0.582025 |
| cnv_UBR7         | 0.359622 |
| cnv_UBXN2A       | 0.242323 |
| cnv_UBXN2B       | 0.421783 |
| cnv_UBXN4        | 0.327613 |
| cnv_UBXN7        | 0.30849  |
| cnv_UCHL3        | 0.596656 |
| cnv_UCHL5        | 0.634841 |
| cnv_UCK2         | 0.45859  |
| cnv_UEVLD        | 0.349015 |
| cnv_UFC1         | 0.65666  |
| cnv_UFD1L        | 0.393031 |
| cnv_UFL1         | 0.493854 |
| cnv_UFM1         | 0.521746 |
| cnv_UHMK1        | 0.634011 |
| cnv_UHRF2        | 0.48426  |
| cnv_ULK3         | 0.67123  |
| cnv_UMPS         | 0.403564 |
| cnv_UNC13B       | 0.283979 |
| cnv_UPF2         | 0.312271 |
| cnv_UPF3B        | 0.464183 |
| cnv_UPK3BL       | 0.37583  |
| cnv_UPP1         | 0.216558 |
| cnv_UQCR10       | 0.276359 |
| cnv_UQCRC1       | 0.385088 |
| cnv_UQCRFS1      | 0.508638 |
| cnv_UQCRQ        | 0.37767  |
| cnv_URB2         | 0.547632 |
| cnv_URGCP        | 0.393033 |
| cnv_URGCP-MRPS24 | 0.528112 |
| cnv_UROD         | 0.390238 |
| cnv_USE1         | 0.591291 |
| cnv_USMG5        | 0.428108 |
| cnv_USO1         | 0.461593 |
| cnv_USP1         | 0.329099 |
| cnv_USP10        | 0.479714 |
| cnv_USP12        | 0.390847 |
| cnv_USP14        | 0.495201 |
| cnv_USP16        | 0.521656 |
| cnv_USP20        | 0.440082 |
| cnv_USP21        | 0.552041 |
| cnv_USP24        | 0.411676 |
| cnv_USP25        | 0.349185 |
| cnv_USP28        | 0.500536 |
| cnv_USP3         | 0.497473 |

|             |          |
|-------------|----------|
| cnv_USP30   | 0.386078 |
| cnv_USP33   | 0.650471 |
| cnv_USP37   | 0.173429 |
| cnv_USP47   | 0.458949 |
| cnv_USP54   | 0.288801 |
| cnv_USP8    | 0.387644 |
| cnv_USPL1   | 0.647809 |
| cnv_UTP14C  | 0.309505 |
| cnv_UTP15   | 0.338573 |
| cnv_UTP20   | 0.297075 |
| cnv_UTP23   | 0.535354 |
| cnv_UTRN    | 0.477448 |
| cnv_UVRAG   | 0.530429 |
| cnv_VAMP1   | 0.28726  |
| cnv_VAMP2   | 0.381561 |
| cnv_VAMP3   | 0.418394 |
| cnv_VAMP4   | 0.570971 |
| cnv_VAMP8   | 0.3188   |
| cnv_VARS    | 0.403262 |
| cnv_VARS2   | 0.592019 |
| cnv_VAT1    | 0.225373 |
| cnv_VBP1    | 0.561862 |
| cnv_VCL     | 0.217236 |
| cnv_VCP     | 0.434301 |
| cnv_VCPKMT  | 0.263453 |
| cnv_VDAC1   | 0.452744 |
| cnv_VDAC3   | 0.401357 |
| cnv_VEGFA   | 0.269158 |
| cnv_VEZF1   | 0.278325 |
| cnv_VEZT    | 0.379015 |
| cnv_VGLL4   | 0.419781 |
| cnv_VILL    | 0.249208 |
| cnv_VIM     | 0.304321 |
| cnv_VIPAS39 | 0.534311 |
| cnv_VKORC1  | 0.264218 |
| cnv_VMP1    | 0.224777 |
| cnv_VOPP1   | 0.315488 |
| cnv_VPS13A  | 0.31524  |
| cnv_VPS13B  | 0.510795 |
| cnv_VPS13C  | 0.384364 |
| cnv_VPS25   | 0.366089 |
| cnv_VPS28   | 0.354096 |
| cnv_VPS35   | 0.349117 |
| cnv_VPS36   | 0.579403 |
| cnv_VPS37A  | 0.477354 |
| cnv_VPS4B   | 0.472125 |
| cnv_VPS51   | 0.490808 |

|             |          |
|-------------|----------|
| cnv_VPS54   | 0.275819 |
| cnv_VPS8    | 0.358502 |
| cnv_VRK2    | 0.242833 |
| cnv_VTA1    | 0.475524 |
| cnv_VTI1B   | 0.639686 |
| cnv_VWA8    | 0.647272 |
| cnv_WARS    | 0.303921 |
| cnv_WASF2   | 0.39381  |
| cnv_WBP1    | 0.302381 |
| cnv_WBP11   | 0.54628  |
| cnv_WBP1L   | 0.337289 |
| cnv_WBP2    | 0.260133 |
| cnv_WBP4    | 0.532215 |
| cnv_WDFY2   | 0.367629 |
| cnv_WDR18   | 0.345948 |
| cnv_WDR26   | 0.553092 |
| cnv_WDR36   | 0.311279 |
| cnv_WDR4    | 0.43378  |
| cnv_WDR41   | 0.476161 |
| cnv_WDR46   | 0.552066 |
| cnv_WDR47   | 0.415079 |
| cnv_WDR48   | 0.345849 |
| cnv_WDR53   | 0.411025 |
| cnv_WDR61   | 0.564751 |
| cnv_WDR70   | 0.487319 |
| cnv_WDR73   | 0.450102 |
| cnv_WDR82   | 0.439218 |
| cnv_WDR83OS | 0.444627 |
| cnv_WDR89   | 0.263464 |
| cnv_WDSUB1  | 0.26049  |
| cnv_WFS1    | 0.390743 |
| cnv_WHAMM   | 0.51262  |
| cnv_WRB     | 0.316328 |
| cnv_WRN     | 0.506606 |
| cnv_WSB1    | 0.203383 |
| cnv_WSB2    | 0.293957 |
| cnv_WWOX    | 0.488579 |
| cnv_WWP1    | 0.442669 |
| cnv_XIAP    | 0.433452 |
| cnv_XPA     | 0.563273 |
| cnv_XPC     | 0.389663 |
| cnv_XPO4    | 0.511501 |
| cnv_XPO5    | 0.514215 |
| cnv_XPO7    | 0.70943  |
| cnv_XPOT    | 0.339011 |
| cnv_XPR1    | 0.451781 |
| cnv_XRCC4   | 0.602812 |

|             |          |
|-------------|----------|
| cnv_XRN1    | 0.318243 |
| cnv_XRRA1   | 0.365854 |
| cnv_YBX1    | 0.368346 |
| cnv_YES1    | 0.43295  |
| cnv_YIF1A   | 0.406069 |
| cnv_YIPF1   | 0.538858 |
| cnv_YIPF3   | 0.400904 |
| cnv_YIPF5   | 0.478984 |
| cnv_YKT6    | 0.546741 |
| cnv_YLPM1   | 0.705927 |
| cnv_YPEL3   | 0.423884 |
| cnv_YTHDC2  | 0.307268 |
| cnv_YTHDF2  | 0.444329 |
| cnv_YTHDF3  | 0.435044 |
| cnv_YWHAB   | 0.340212 |
| cnv_YWHAG   | 0.298513 |
| cnv_YWHAH   | 0.245542 |
| cnv_YWHAQ   | 0.358818 |
| cnv_YWHAZ   | 0.536672 |
| cnv_YY1AP1  | 0.617774 |
| cnv_ZADH2   | 0.496918 |
| cnv_ZBED3   | 0.49709  |
| cnv_ZBED6CL | 0.465192 |
| cnv_ZBTB11  | 0.26982  |
| cnv_ZBTB2   | 0.332621 |
| cnv_ZBTB21  | 0.333122 |
| cnv_ZBTB24  | 0.282168 |
| cnv_ZBTB25  | 0.348667 |
| cnv_ZBTB26  | 0.350603 |
| cnv_ZBTB33  | 0.47634  |
| cnv_ZBTB34  | 0.301352 |
| cnv_ZBTB38  | 0.29946  |
| cnv_ZBTB4   | 0.525088 |
| cnv_ZBTB41  | 0.40862  |
| cnv_ZBTB44  | 0.502754 |
| cnv_ZBTB5   | 0.405777 |
| cnv_ZBTB8OS | 0.451072 |
| cnv_ZC2HC1A | 0.246453 |
| cnv_ZC3H11A | 0.477689 |
| cnv_ZC3H13  | 0.497015 |
| cnv_ZC3H14  | 0.541397 |
| cnv_ZC3H7A  | 0.396229 |
| cnv_ZC3HAV1 | 0.313362 |
| cnv_ZC3HC1  | 0.507088 |
| cnv_ZCCHC10 | 0.311356 |
| cnv_ZCCHC11 | 0.460989 |
| cnv_ZCCHC6  | 0.373013 |

|             |          |
|-------------|----------|
| cnv_ZCCHC7  | 0.321053 |
| cnv_ZCCHC9  | 0.481228 |
| cnv_ZDHHC12 | 0.330143 |
| cnv_ZDHHC13 | 0.392129 |
| cnv_ZDHHC14 | 0.263479 |
| cnv_ZDHHC17 | 0.422784 |
| cnv_ZDHHC2  | 0.58611  |
| cnv_ZDHHC20 | 0.397924 |
| cnv_ZDHHC23 | 0.380963 |
| cnv_ZDHHC6  | 0.273996 |
| cnv_ZDHHC9  | 0.464964 |
| cnv_ZFAND2A | 0.508114 |
| cnv_ZFAND2B | 0.254177 |
| cnv_ZFAND6  | 0.309706 |
| cnv_ZFAT    | 0.264464 |
| cnv_ZFC3H1  | 0.236464 |
| cnv_ZFP62   | 0.443219 |
| cnv_ZFP90   | 0.337901 |
| cnv_ZFP91   | 0.475046 |
| cnv_ZFYVE21 | 0.38836  |
| cnv_ZFYVE26 | 0.576704 |
| cnv_ZGPAT   | 0.419146 |
| cnv_ZHX1    | 0.446649 |
| cnv_ZKSCAN8 | 0.371982 |
| cnv_ZMAT1   | 0.348528 |
| cnv_ZMAT2   | 0.481117 |
| cnv_ZMAT3   | 0.333407 |
| cnv_ZMYM4   | 0.321169 |
| cnv_ZMYND8  | 0.279324 |
| cnv_ZNF101  | 0.429939 |
| cnv_ZNF106  | 0.444243 |
| cnv_ZNF12   | 0.414122 |
| cnv_ZNF121  | 0.514892 |
| cnv_ZNF131  | 0.583541 |
| cnv_ZNF136  | 0.425022 |
| cnv_ZNF146  | 0.344105 |
| cnv_ZNF177  | 0.314846 |
| cnv_ZNF195  | 0.430266 |
| cnv_ZNF20   | 0.386712 |
| cnv_ZNF200  | 0.282268 |
| cnv_ZNF202  | 0.554716 |
| cnv_ZNF211  | 0.367637 |
| cnv_ZNF215  | 0.398896 |
| cnv_ZNF224  | 0.351031 |
| cnv_ZNF23   | 0.403753 |
| cnv_ZNF24   | 0.583334 |
| cnv_ZNF251  | 0.331021 |



|                   |          |
|-------------------|----------|
| cnv_ZNF264        | 0.372683 |
| cnv_ZNF266        | 0.366307 |
| cnv_ZNF275        | 0.398046 |
| cnv_ZNF277        | 0.39234  |
| cnv_ZNF281        | 0.447356 |
| cnv_ZNF286B       | 0.213608 |
| cnv_ZNF296        | 0.245197 |
| cnv_ZNF302        | 0.303162 |
| cnv_ZNF304        | 0.261305 |
| cnv_ZNF317        | 0.447936 |
| cnv_ZNF318        | 0.364842 |
| cnv_ZNF326        | 0.359303 |
| cnv_ZNF35         | 0.329526 |
| cnv_ZNF395        | 0.569729 |
| cnv_ZNF398        | 0.269115 |
| cnv_ZNF410        | 0.570157 |
| cnv_ZNF419        | 0.277808 |
| cnv_ZNF426        | 0.441342 |
| cnv_ZNF430        | 0.263137 |
| cnv_ZNF451        | 0.212299 |
| cnv_ZNF510        | 0.315684 |
| cnv_ZNF514        | 0.328517 |
| cnv_ZNF532        | 0.390547 |
| cnv_ZNF548        | 0.403212 |
| cnv_ZNF559-ZNF177 | 0.324034 |
| cnv_ZNF561        | 0.499926 |
| cnv_ZNF562        | 0.488595 |
| cnv_ZNF564        | 0.330489 |
| cnv_ZNF565        | 0.394955 |
| cnv_ZNF574        | 0.32288  |
| cnv_ZNF581        | 0.395767 |
| cnv_ZNF587        | 0.305049 |
| cnv_ZNF622        | 0.549041 |
| cnv_ZNF625        | 0.490425 |
| cnv_ZNF625-ZNF20  | 0.517411 |
| cnv_ZNF644        | 0.458766 |
| cnv_ZNF652        | 0.322551 |
| cnv_ZNF655        | 0.511689 |
| cnv_ZNF689        | 0.556492 |
| cnv_ZNF691        | 0.269864 |
| cnv_ZNF700        | 0.472803 |
| cnv_ZNF721        | 0.349787 |
| cnv_ZNF764        | 0.53766  |
| cnv_ZNF770        | 0.467812 |
| cnv_ZNF776        | 0.291376 |
| cnv_ZNF786        | 0.293003 |
| cnv_ZNF805        | 0.402398 |

|             |          |
|-------------|----------|
| cnv_ZNF844  | 0.305962 |
| cnv_ZNF862  | 0.341917 |
| cnv_ZNHIT1  | 0.50349  |
| cnv_ZNHIT6  | 0.329953 |
| cnv_ZPR1    | 0.602089 |
| cnv_ZRANB2  | 0.469014 |
| cnv_ZSCAN16 | 0.296715 |
| cnv_ZSCAN21 | 0.518437 |
| cnv_ZSCAN26 | 0.29941  |
| cnv_ZSCAN29 | 0.516164 |
| cnv_ZSWIM6  | 0.369824 |
| cnv_ZUFSP   | 0.478173 |
| cnv_ZW10    | 0.605897 |
| cnv_ZWILCH  | 0.27851  |
| cnv_ZYG11B  | 0.471404 |
| cnv_ZZZ3    | 0.492597 |

**Supplementary Table 4.** Comparison of M3CN with public network/pathway database

|          | Observed<br>(percent) | meanR | sdR    | p-value                 |
|----------|-----------------------|-------|--------|-------------------------|
| HumanNet | 0.0795                | 0.011 | 0.0014 | ~0                      |
| HPRD     | 0.0159                | 0.002 | 0.0008 | $6.38 \times 10^{-68}$  |
| STRING   | 0.0788                | 0.005 | 0.0012 | ~0                      |
| KEGG     | 0.3152                | 0.047 | 0.0092 | $3.92 \times 10^{-187}$ |
| Hallmark | 0.3715                | 0.089 | 0.0124 | $3.44 \times 10^{-115}$ |
| GO       | 0.1327                | 0.048 | 0.0055 | $8.18 \times 10^{-54}$  |
| InnateDB | 0.0439                | 0.002 | 0.0042 | $9.69 \times 10^{-24}$  |



**Supplementary Table 6. Enrichment of signature genes in chromosomes**

| Signatures     | Chrom. | p value  | number of genes | Genes                                                                            |
|----------------|--------|----------|-----------------|----------------------------------------------------------------------------------|
| Burington_92   | chr1   | 2.70E-02 | 13              | MACF1,GADD45A,SARS,EIF4G3,SF3B4,STXBP3,UCK2,AGL,CD53,C1orf38,ILF2,AMPD1,PDE4B    |
| Decaux_15      | chr12  | 1.73E-02 | 3               | MGST1,CPSF6,ALDH2                                                                |
| Dickens_6      | chr13  | 7.35E-02 | 1               | ITM2B                                                                            |
| Hose_50        | chr10  | 5.52E-03 | 6               | CEP55,KIF11,MKI67,PGAM1,MCM10,ZWINT                                              |
| Kassambara_22  | chr15  | 3.08E-02 | 3               | FANCI,RAD51,BLM                                                                  |
| Kryukov_12     | chr15  | 5.41E-02 | 2               | RAD51,BUB1B                                                                      |
| Kuiper_92      | chr4   | 5.06E-02 | 7               | ST13,GABRA4,AIMP1,PGM2,FGFR3,NCAPG,CENPE                                         |
| Reme_19        | chr15  | 1.28E-01 | 2               | NUSAP1,EHD4                                                                      |
| Shaughnessy_70 | chr1   | 5.54E-05 | 14              | CKS1B,IFI16,AHCYL1,TRIM33,CTBS,FUCA1,AIM2,KIF14,EVI5,ASPM,PSMD4,TAGLN2,ENO1,OPN3 |
| Wu_10          | chr8   | 3.95E-02 | 2               | MYBL1,PTP4A3                                                                     |
| Zhan_52        | chr5   | 2.11E-02 | 5               | ZNF131,VDAC1,TCERG1,LARS,SMAD5                                                   |

**Supplementary Table 7. Key regulators identified in M3CN for three signatures**

| Key regulators | signatures     | p-values |
|----------------|----------------|----------|
| NOP16          | Shaughnessy_70 | 1.38E-07 |
| CECR5          | Shaughnessy_70 | 4.36E-06 |
| CDK1           | Hose_50        | 0        |
| DTL            | Hose_50        | 0        |
| CENPA          | Hose_50        | 1.58E-12 |
| TROAP          | Hose_50        | 3.12E-11 |
| OIP5           | Hose_50        | 1.07E-08 |
| CENPU          | Hose_50        | 1.16E-08 |
| NUSAP1         | Hose_50        | 2.95E-07 |
| CEP78          | Hose_50        | 2.71E-06 |
| DNMT1          | Hose_50        | 4.05E-06 |
| CDKN2A         | Hose_50        | 5.78E-06 |
| MELK           | Kuiper_92      | 2.83E-11 |
| TPX2           | Kuiper_92      | 9.65E-11 |
| NCAPG2         | Kuiper_92      | 2.13E-06 |

**Supplementary Table 8.** Nodes in the prognostic subnetwork.

| Node name (Gene symbol) |
|-------------------------|
| ADSL                    |
| APOBEC3B                |
| ASF1B                   |
| AURKB                   |
| BIRC5                   |
| BRCA1                   |
| BUB1B                   |
| C11orf48                |
| CCNB2                   |
| CCT2                    |
| CDC20                   |
| CDC25A                  |
| CDC45                   |
| CDCA3                   |
| CDCA5                   |
| CDCA8                   |
| CDK1                    |
| CDK2                    |
| CDKN2A                  |
| CDKN3                   |
| CDT1                    |
| CECR5                   |
| CENPA                   |
| CENPE                   |
| CENPH                   |
| CENPJ                   |
| CENPM                   |
| CENPU                   |
| CENPW                   |
| CEP78                   |
| CHEK1                   |
| CHTF18                  |
| CIRH1A                  |
| CKS1B                   |
| CPSF3                   |
| CRELD2                  |
| CTNNAL1                 |
| DDIAS                   |
| DHFR                    |
| DNA2                    |
| DNMT1                   |
| DONSON                  |
| DTL                     |
| DUT                     |

|              |
|--------------|
| E2F2         |
| ENO1         |
| ESPL1        |
| EVI2B        |
| EXO1         |
| EXOSC4       |
| EZH2         |
| FABP5        |
| FANCI        |
| FARSA        |
| FEN1         |
| FOXM1        |
| GIN51        |
| GMNN         |
| H2AFZ        |
| HAUS1        |
| HJURP        |
| HK2          |
| HMGB2        |
| HMGB3        |
| HMGB3P1      |
| HMMR         |
| KARS         |
| KIAA0101     |
| KIF18B       |
| KIF2C        |
| KIF4A        |
| KIFC1        |
| KNSTRN       |
| KPNA2        |
| LMNB1        |
| LOC100505715 |
| LOC102288414 |
| LRR1         |
| MAD2L1       |
| MARS2        |
| MCM2         |
| MCM3         |
| MCM4         |
| MCM5         |
| MCM6         |
| MCM7         |
| MELK         |
| MKI67        |
| MRPL17       |
| MRTO4        |
| MSH2         |



|             |
|-------------|
| MSH5        |
| MSH5-SAPCD1 |
| MTIF2       |
| MYC         |
| NCAPD3      |
| NCAPG       |
| NCAPG2      |
| NDC80       |
| NDUFV3      |
| NIFK        |
| NOM1        |
| NOP16       |
| NUDT1       |
| NUP205      |
| NUSAP1      |
| OIP5        |
| OSTC        |
| OXCT1       |
| PAK1IP1     |
| PAM         |
| PBK         |
| PCNA        |
| PFKM        |
| PHF19       |
| PHF5A       |
| PODXL       |
| POLA1       |
| POLD1       |
| POLE        |
| POLE2       |
| POLQ        |
| PRC1        |
| PRIM1       |
| PRKCI       |
| PSMC3IP     |
| PTS         |
| PTTG1       |
| RACGAP1     |
| RAD51AP1    |
| RAD51C      |
| RAN         |
| RFC2        |
| RFC4        |
| RMI1        |
| RMI2        |
| RNASEH2A    |
| RRM1        |

|           |
|-----------|
| RRM2      |
| RUVBL1    |
| SAPCD1    |
| SAPCD2    |
| SELK      |
| SHCBP1    |
| SLFN13    |
| SMC2      |
| SNX5      |
| SORD      |
| SPAG5     |
| SPDL1     |
| SSSCA1    |
| STIL      |
| STMN1     |
| SUV39H2   |
| TACC3     |
| TIMM8B    |
| TK1       |
| TMPO      |
| TNFRSF13C |
| TOPBP1    |
| TPX2      |
| TRIP13    |
| TROAP     |
| TRRAP     |
| TTLL12    |
| TYMS      |
| UBE2C     |
| UBE2T     |
| UHRF1     |
| WDR4      |
| WDR75     |
| WEE1      |
| YEATS4    |
| ZC3H8     |
| ZNF266    |
| ZNF367    |
| ZWILCH    |
| ZWINT     |

**Supplementary Table 9.** Regulations among nodes in the prognostic subnetwork.

| parent node |    | child node |
|-------------|----|------------|
| ADSL        | -> | CECR5      |
| ADSL        | -> | CPSF3      |
| ADSL        | -> | ENO1       |
| ADSL        | -> | MRTO4      |
| ADSL        | -> | MTIF2      |
| ADSL        | -> | OXCT1      |
| AURKB       | -> | CDC20      |
| AURKB       | -> | CHTF18     |
| AURKB       | -> | E2F2       |
| AURKB       | -> | POLD1      |
| AURKB       | -> | POLE       |
| BIRC5       | -> | CDT1       |
| BIRC5       | -> | CENPW      |
| BIRC5       | -> | KIF2C      |
| BIRC5       | -> | NUDT1      |
| BIRC5       | -> | TACC3      |
| BIRC5       | -> | TK1        |
| BIRC5       | -> | TROAP      |
| BUB1B       | -> | KIF4A      |
| BUB1B       | -> | MAD2L1     |
| BUB1B       | -> | MCM2       |
| BUB1B       | -> | MELK       |
| BUB1B       | -> | OIP5       |
| BUB1B       | -> | PRC1       |
| CCNB2       | -> | PTTG1      |
| CCT2        | -> | ADSL       |
| CDCA3       | -> | CDC25A     |
| CDCA3       | -> | CDCA8      |
| CDCA3       | -> | CDK2       |
| CDCA3       | -> | CENPA      |
| CDCA3       | -> | UBE2C      |
| CDK1        | -> | CCNB2      |
| CDK1        | -> | CDC20      |
| CDK1        | -> | CDKN3      |
| CDK1        | -> | CENPE      |
| CDK1        | -> | H2AFZ      |
| CDK1        | -> | NCAPG      |
| CDK1        | -> | NDC80      |
| CDK1        | -> | TYMS       |
| CDK1        | -> | UBE2C      |
| CDT1        | -> | CDCA3      |
| CENPE       | -> | LMNB1      |
| CENPH       | -> | YEATS4     |
| CENPU       | -> | ZNF367     |
| CPSF3       | -> | HAUS1      |

|              |    |              |
|--------------|----|--------------|
| DTL          | -> | APOBEC3B     |
| DTL          | -> | GIN51        |
| DTL          | -> | MCM6         |
| DTL          | -> | MELK         |
| DTL          | -> | UBE2T        |
| DUT          | -> | ZNF266       |
| ESPL1        | -> | HJURP        |
| ESPL1        | -> | KIFC1        |
| ESPL1        | -> | TROAP        |
| EXOSC4       | -> | FABP5        |
| EXOSC4       | -> | NDUFV3       |
| EXOSC4       | -> | PODXL        |
| EZH2         | -> | CDKN3        |
| FARSA        | -> | EXOSC4       |
| FARSA        | -> | RNASEH2A     |
| GIN51        | -> | CHEK1        |
| GIN51        | -> | CKS1B        |
| GIN51        | -> | FEN1         |
| GIN51        | -> | MCM2         |
| GIN51        | -> | MCM3         |
| GIN51        | -> | MSH2         |
| GIN51        | -> | POLE2        |
| GIN51        | -> | PRIM1        |
| GIN51        | -> | RAD51AP1     |
| GIN51        | -> | RMI2         |
| GIN51        | -> | SLFN13       |
| GIN51        | -> | STIL         |
| GIN51        | -> | SUV39H2      |
| GIN51        | -> | TPX2         |
| H2AFZ        | -> | HMGB2        |
| H2AFZ        | -> | LOC100505715 |
| HAUS1        | -> | MSH2         |
| HAUS1        | -> | RAD51AP1     |
| HMGB3        | -> | HMGB3P1      |
| HMMR         | -> | PTTG1        |
| KARS         | -> | CIRH1A       |
| KIAA0101     | -> | CCNB2        |
| KIAA0101     | -> | TRIP13       |
| KNSTRN       | -> | SPDL1        |
| LOC102288414 | -> | C11orf48     |
| MAD2L1       | -> | CENPU        |
| MAD2L1       | -> | LRR1         |
| MAD2L1       | -> | RFC4         |
| MAD2L1       | -> | RNASEH2A     |
| MCM2         | -> | CDKN2A       |
| MCM2         | -> | MCM5         |
| MCM2         | -> | MCM7         |

|        |    |             |
|--------|----|-------------|
| MCM2   | -> | MSH5        |
| MCM2   | -> | MSH5-SAPCD1 |
| MCM2   | -> | NCAPD3      |
| MCM2   | -> | PAM         |
| MCM2   | -> | SAPCD1      |
| MCM3   | -> | GMNN        |
| MCM4   | -> | POLE2       |
| MCM4   | -> | RFC2        |
| MCM6   | -> | CTNNAL1     |
| MCM6   | -> | DNA2        |
| MCM6   | -> | MAD2L1      |
| MCM6   | -> | PCNA        |
| MCM6   | -> | RAD51C      |
| MELK   | -> | POLQ        |
| MKI67  | -> | BIRC5       |
| MKI67  | -> | BRCA1       |
| MKI67  | -> | CDC45       |
| MKI67  | -> | CDCA3       |
| MKI67  | -> | CDCA5       |
| MKI67  | -> | CDK1        |
| MKI67  | -> | CENPM       |
| MKI67  | -> | FOXM1       |
| MKI67  | -> | KIF18B      |
| MKI67  | -> | KIF4A       |
| MKI67  | -> | MCM4        |
| MKI67  | -> | TPX2        |
| MKI67  | -> | WEE1        |
| NCAPG  | -> | PSMC3IP     |
| NCAPG  | -> | RRM1        |
| NCAPG  | -> | TRIP13      |
| NCAPG  | -> | ZWINT       |
| NCAPG2 | -> | DHFR        |
| NIFK   | -> | MARS2       |
| NIFK   | -> | PAK1IP1     |
| NIFK   | -> | PHF5A       |
| NIFK   | -> | RAN         |
| NIFK   | -> | SNX5        |
| NIFK   | -> | WDR75       |
| NIFK   | -> | ZC3H8       |
| NOP16  | -> | CIRH1A      |
| NOP16  | -> | EXOSC4      |
| NOP16  | -> | NIFK        |
| NOP16  | -> | PFKM        |
| NOP16  | -> | TIMM8B      |
| NUP205 | -> | DNMT1       |
| NUP205 | -> | NOM1        |
| NUP205 | -> | PRKCI       |

|          |    |             |
|----------|----|-------------|
| NUP205   | -> | TRRAP       |
| NUSAP1   | -> | DHFR        |
| NUSAP1   | -> | FANCI       |
| NUSAP1   | -> | HMMR        |
| NUSAP1   | -> | KIAA0101    |
| OIP5     | -> | CENPH       |
| OIP5     | -> | CENPJ       |
| OIP5     | -> | DUT         |
| OIP5     | -> | HMGB3       |
| OIP5     | -> | SPDL1       |
| OIP5     | -> | STIL        |
| OIP5     | -> | ZWILCH      |
| OSTC     | -> | H2AFZ       |
| PCNA     | -> | MSH2        |
| POLE2    | -> | DNMT1       |
| POLE2    | -> | KIF2C       |
| POLQ     | -> | EVI2B       |
| PRC1     | -> | NUSAP1      |
| PRIM1    | -> | POLA1       |
| RAD51AP1 | -> | CEP78       |
| RAD51AP1 | -> | DDIAS       |
| RAD51AP1 | -> | POLA1       |
| RAD51AP1 | -> | RACGAP1     |
| RAD51AP1 | -> | SMC2        |
| RAD51AP1 | -> | TMPO        |
| RFC2     | -> | MCM6        |
| RMI1     | -> | HMMR        |
| RMI2     | -> | NCAPG2      |
| RRM2     | -> | MELK        |
| RRM2     | -> | NUSAP1      |
| RRM2     | -> | TYMS        |
| RUVBL1   | -> | EXOSC4      |
| RUVBL1   | -> | SORD        |
| SAPCD1   | -> | MSH5        |
| SAPCD1   | -> | MSH5-SAPCD1 |
| SMC2     | -> | NUP205      |
| SMC2     | -> | RMI1        |
| SMC2     | -> | TOPBP1      |
| SORD     | -> | HK2         |
| SORD     | -> | MYC         |
| SORD     | -> | NOP16       |
| SORD     | -> | SELK        |
| SORD     | -> | TTLL12      |
| SPAG5    | -> | KPNA2       |
| SPAG5    | -> | POLQ        |
| STMN1    | -> | SPAG5       |
| TIMM8B   | -> | C11orf48    |

|        |    |              |
|--------|----|--------------|
| TIMM8B | -> | CRELD2       |
| TIMM8B | -> | LOC102288414 |
| TIMM8B | -> | MRPL17       |
| TIMM8B | -> | PTS          |
| TIMM8B | -> | SSSCA1       |
| TK1    | -> | AURKB        |
| TK1    | -> | RRM2         |
| TMPO   | -> | LMNB1        |
| TOPBP1 | -> | FANCI        |
| TPX2   | -> | CENPA        |
| TPX2   | -> | EXO1         |
| TPX2   | -> | HJURP        |
| TPX2   | -> | SPAG5        |
| TROAP  | -> | AURKB        |
| TROAP  | -> | SAPCD2       |
| TYMS   | -> | CENPW        |
| TYMS   | -> | STMN1        |
| UBE2T  | -> | DONSON       |
| UBE2T  | -> | GMNN         |
| UHRF1  | -> | ASF1B        |
| WDR4   | -> | ADSL         |
| ZWILCH | -> | NDC80        |
| ZWILCH | -> | TNFRSF13C    |
| ZWINT  | -> | ASF1B        |
| ZWINT  | -> | BUB1B        |
| ZWINT  | -> | DTL          |
| ZWINT  | -> | NCAPG2       |
| ZWINT  | -> | PBK          |
| ZWINT  | -> | PHF19        |
| ZWINT  | -> | SHCBP1       |
| ZWINT  | -> | UHRF1        |
| ZWINT  | -> | ZNF367       |

**Supplementary Table 10. Pathway analysis of the prognostic subnetwork**

| PANTHER GO-Slim Biological Process                       | #genes in pathway | raw P-value | FDR      |
|----------------------------------------------------------|-------------------|-------------|----------|
| cell cycle (GO:0007049)                                  | 42                | 6.12E-26    | 1.10E-22 |
| mitotic cell cycle process (GO:1903047)                  | 25                | 1.30E-20    | 7.81E-18 |
| mitotic cell cycle (GO:0000278)                          | 25                | 1.30E-20    | 1.17E-17 |
| mitotic nuclear division (GO:0140014)                    | 23                | 1.84E-18    | 8.25E-16 |
| DNA replication (GO:0006260)                             | 20                | 3.95E-18    | 1.42E-15 |
| cellular macromolecule biosynthetic process (GO:0034645) | 20                | 2.95E-17    | 8.83E-15 |
| nucleic acid metabolic process (GO:0090304)              | 25                | 5.95E-15    | 1.34E-12 |
| DNA-dependent DNA replication (GO:0006261)               | 13                | 5.62E-15    | 1.44E-12 |
| DNA metabolic process (GO:0006259)                       | 16                | 2.13E-14    | 4.26E-12 |
| cellular biosynthetic process (GO:0044249)               | 20                | 3.46E-14    | 6.22E-12 |
| biosynthetic process (GO:0009058)                        | 20                | 4.12E-13    | 6.72E-11 |
| DNA repair (GO:0006281)                                  | 15                | 6.31E-11    | 9.44E-09 |
| cellular response to DNA damage stimulus (GO:0006974)    | 16                | 1.27E-10    | 1.75E-08 |
| chromosome organization (GO:0051276)                     | 15                | 2.91E-10    | 3.74E-08 |
| mitotic sister chromatid segregation (GO:0000070)        | 8                 | 5.05E-09    | 6.05E-07 |
| meiotic cell cycle (GO:0051321)                          | 9                 | 2.18E-08    | 2.31E-06 |
| meiotic cell cycle process (GO:1903046)                  | 9                 | 2.18E-08    | 2.45E-06 |
| cellular response to stress (GO:0033554)                 | 16                | 3.73E-08    | 3.73E-06 |
| nuclear DNA replication (GO:0033260)                     | 5                 | 4.32E-08    | 3.88E-06 |
| reproductive process (GO:0022414)                        | 9                 | 4.12E-08    | 3.89E-06 |
| regulation of cell cycle process (GO:0010564)            | 8                 | 1.36E-07    | 1.11E-05 |
| DNA biosynthetic process (GO:0071897)                    | 8                 | 1.36E-07    | 1.16E-05 |
| regulation of cell cycle (GO:0051726)                    | 10                | 1.65E-07    | 1.28E-05 |
| cellular process (GO:0009987)                            | 83                | 2.15E-07    | 1.61E-05 |
| Unclassified (UNCLASSIFIED)                              | 54                | 3.68E-07    | 2.65E-05 |



|                                                                |    |          |          |
|----------------------------------------------------------------|----|----------|----------|
| metabolic process (GO:0008152)                                 | 62 | 6.28E-07 | 4.34E-05 |
| DNA strand elongation involved in DNA replication (GO:0006271) | 4  | 1.39E-06 | 9.25E-05 |
| meiosis I cell cycle process (GO:0061982)                      | 6  | 1.54E-06 | 9.88E-05 |

**Supplementary Table 11. Top biological processes enriched in the treatment response signatures**

| Signature      | Biological process                                       | raw p value | FDR      |
|----------------|----------------------------------------------------------|-------------|----------|
| Bhutani_176    | defense response to virus (GO:0051607)                   | 1.55E-05    | 9.27E-03 |
| Bhutani_176    | cellular process (GO:0009987)                            | 1.25E-05    | 2.25E-02 |
| Mitra_42       | cellular lipid catabolic process (GO:0044242)            | 1.88E-03    | 1.00E+00 |
| Mitra_42       | carbohydrate metabolic process (GO:0005975)              | 5.83E-03    | 1.00E+00 |
| Mulligan_100   | antibacterial humoral response (GO:0019731)              | 2.95E-04    | 5.30E-01 |
| Mulligan_100   | defense response to Gram-negative bacterium (GO:0050829) | 2.09E-03    | 1.00E+00 |
| Shaughnessy_80 | proteasomal protein catabolic process (GO:0010498)       | 5.83E-10    | 5.24E-07 |
| Shaughnessy_80 | defense response to Gram-negative bacterium (GO:0050829) | 2.09E-03    | 1.00E+00 |
| Zhu_244        | protein import into nucleus (GO:0006606)                 | 2.80E-10    | 5.02E-07 |
| Zhu_244        | macromolecule metabolic process (GO:0043170)             | 1.95E-09    | 1.75E-06 |

**Supplementary Table 12. Enrichment of response signature genes in chromosomes**

| Signature      | chr.  | p-value    | num. of genes | Genes                                                                                                                                                        |
|----------------|-------|------------|---------------|--------------------------------------------------------------------------------------------------------------------------------------------------------------|
| Bhutani_176    | chr1  | 0.02546535 | 23            | MUC1_KCNA3_FCGR2C_JUN_MACF1<br>_FCGR2A_FCGR2B_CRYZ_RABGAP1L<br>_AMPD1_CR2_PBXIP1_FAIM3_RGS1_<br>DPYD_RAB13_PEA15_RNPEP_CAPN2<br>_B4GALT3_DDR2_TRAF3IP3_PRDX6 |
| Mitra_42       | chr22 | 0.01612247 | 4             | MYH9_CERK_NCAPH2_LMF2                                                                                                                                        |
| Mulligan_100   | chrX  | 2.94E-05   | 10            | GAGE4_MAGEA3_SXX2_CTAG1A_<br>SSX1_SXX4_SLC6A8_SXX3_<br>CTAG1B_MAGEA6                                                                                         |
| Shaughnessy_80 | chr17 | 0.20838642 | 5             | NMT1_BIRC5_PSMC5_PSMB3_TMC8                                                                                                                                  |
| Zhu_244        | chr4  | 0.00690187 | 2             | POLR2B_AFF1                                                                                                                                                  |

**Supplementary Table 13. Top biological processes enriched in genes in the response subnetworks**

| Subnetworks               | biology process                                          | raw p value | FDR      |
|---------------------------|----------------------------------------------------------|-------------|----------|
| subnetwork_Bhutani_176    | defense response to virus (GO:0051607)                   | 1.77E-15    | 3.17E-12 |
| subnetwork_Bhutani_176    | immune system process (GO:0002376)                       | 1.47E-10    | 1.32E-07 |
| subnetwork_Zhu_244        | metabolic process (GO:0008152)                           | 1.65E-06    | 2.97E-03 |
| subnetwork_Zhu_244        | organic substance metabolic process (GO:0071704)         | 4.75E-05    | 4.27E-02 |
| subnetwork_Shaughnessy_80 | cellular response to stress (GO:0033554)                 | 4.92E-05    | 4.41E-02 |
| subnetwork_Shaughnessy_80 | autophagy of mitochondrion (GO:0000422)                  | 3.94E-05    | 7.08E-02 |
| subnetwork_Mulligan_100   | antibacterial humoral response (GO:0019731)              | 4.11E-07    | 7.39E-04 |
| subnetwork_Mulligan_100   | defense response to Gram-negative bacterium (GO:0050829) | 7.01E-06    | 6.30E-03 |

**Supplementary Table 14.** Nodes in the IMiD response subnetwork.

| Node name (gene symbol) |
|-------------------------|
| APEX1                   |
| PRMT5                   |
| LSM12                   |
| NDUFB5                  |
| FOSB                    |
| JUN                     |
| NASP                    |
| PIGU                    |
| PHF14                   |
| PLRG1                   |
| SYNCRIP                 |
| C10orf10                |
| CDC73                   |
| KIAA1279                |
| PRKAR1A                 |
| CUL2                    |
| SMC4                    |
| HPRT1                   |
| NNT                     |
| SNRPD1                  |
| WDR4                    |
| HSPA14                  |
| RNF138                  |
| NEDD1                   |
| YTHDF3                  |
| GAS6                    |
| C14orf166               |
| RP11-97C16.1            |
| SOCS3                   |
| MDN1                    |
| LARP4                   |
| PSMA7                   |
| PPP1R15A                |
| ASCC3                   |
| ADSL                    |
| CPSF3                   |
| NDUFAF4                 |
| MRT04                   |
| MAT2A                   |
| NUP133                  |
| POLR1C                  |
| POLR2G                  |
| ESF1                    |
| GTF3C3                  |
| TFAM                    |

|              |
|--------------|
| ZFR          |
| NOLC1        |
| AGPS         |
| CSTF1        |
| NPEPPS       |
| REEP2        |
| MTPAP        |
| EXOSC3       |
| NUDT21       |
| SQSTM1       |
| ORC4         |
| POT1         |
| UMPS         |
| DDX21        |
| SF3A3        |
| MIS18A       |
| PRB1         |
| LOC100131541 |
| USP34        |
| MIR6733      |
| CCDC186      |
| LDHA         |
| AJ420595     |
| FOS          |
| PSMD1        |
| SMC3         |
| SCAF11       |
| DIEXF        |
| GEMIN2       |
| GEMIN5       |
| MKKS         |
| CAND1        |
| MLN          |
| NUP153       |
| CAPZA2       |
| TAF1D        |
| PRR7         |
| DNAJA2       |
| DNAJA3       |
| ALDH18A1     |
| OTUD1        |
| NAA25        |
| NIF3L1       |
| TIMM23B      |
| ZNF638       |
| PUS7         |
| ZNF638-IT1   |

|               |
|---------------|
| LTV1          |
| MBNL1         |
| UTP20         |
| XPO1          |
| PCNP          |
| BCLAF1        |
| DNAJC25-GNG10 |
| ZBTB41        |
| ANKRD44       |
| F12           |
| BIRC6         |
| PTP4A3        |
| RAD21         |
| TIA1          |
| TROVE2        |
| RANBP9        |
| PA2G4         |
| CCT2          |
| SETD2         |
| GNL2          |
| PSMD14        |
| PSMA1         |
| PSMA6         |
| EIF2B2        |
| ALYREF        |
| GLUD1         |
| FLJ38717      |
| NME3          |
| FTSJ2         |
| ALKBH3        |
| G2E3          |
| POU2F2        |
| IL13RA1       |
| AK022030      |
| IDH1          |
| RAB8A         |
| WNT4          |
| SRSF10        |
| TXNDC16       |
| SRBD1         |
| MAGOH         |
| MDM1          |
| GNAI3         |
| LOC100130872  |
| PTPRG         |
| MST4          |
| WRN           |

|          |
|----------|
| TXLNG    |
| C4orf46  |
| NXT1     |
| ZNF639   |
| CMTM7    |
| CNIH1    |
| MUC1     |
| COL9A2   |
| RXRA     |
| CCDC91   |
| CCNB1IP1 |
| SLC33A1  |
| CASP3    |
| DCP1B    |
| DCBLD1   |
| C6orf203 |
| MTIF2    |
| OXCT1    |
| ENO1     |
| CECR5    |
| SNRNP40  |
| C10orf2  |
| PSMD13   |
| PEX1     |
| TSPAN33  |
| C1GALT1  |
| DHRS3    |
| SNX14    |
| MTMR12   |
| KBTBD2   |
| METAP2   |
| HSF2     |
| ILF3     |
| ARMC8    |
| TWISTNB  |
| SRRD     |
| TTPAL    |
| FAM118B  |
| C12orf73 |
| COMMD9   |
| KPNA3    |
| XRN2     |
| KNSTRN   |
| TOMM40L  |
| GEMIN6   |
| ALAS1    |
| ETF1     |



|               |
|---------------|
| RPA2          |
| APMAP         |
| IGSF22        |
| BAZ1A         |
| ZMYND8        |
| EBNA1BP2      |
| ANKRD12       |
| SON           |
| DUSP1         |
| METTL21A      |
| CBX3          |
| ARID2         |
| HMGCS1        |
| TUBB          |
| NANP          |
| TTC4          |
| KEAP1         |
| TBC1D15       |
| TXNL1         |
| KIAA1033      |
| P2RX7         |
| RP11-500C11.3 |
| KLF11         |
| RALA          |
| CSNK2A2       |
| NARS          |
| PUS1          |
| OAT           |
| YTHDC2        |
| ZDHHC17       |
| USP14         |
| SMCHD1        |
| SRGAP2        |
| LOC101060691  |
| RBM41         |
| DCAF16        |
| KBTBD3        |
| CCNC          |
| PPP1R12A      |
| WEE1          |
| ALMS1         |
| DNAJC25       |
| GRK6          |
| MIB1          |
| LLPH          |
| RAB3GAP2      |
| SFT2D2        |

|        |
|--------|
| CORO1C |
| CA5BP1 |
| RPF2   |
| PPIH   |
| PSMC1  |
| DTD2   |

**Supplementary Table 15.** Regulations among nodes in the IMiD response subnetwork.

| Parent node | child node   |
|-------------|--------------|
| APEX1       | PRMT5        |
| PRMT5       | EIF2B2       |
| LSM12       | ALYREF       |
| LSM12       | GLUD1        |
| NDUFB5      | C14orf166    |
| FOSB        | JUN          |
| JUN         | FLJ38717     |
| NASP        | C10orf10     |
| PIGU        | NME3         |
| PHF14       | FTSJ2        |
| PHF14       | ALKBH3       |
| PLRG1       | YTHDF3       |
| PLRG1       | G2E3         |
| PLRG1       | LARP4        |
| PLRG1       | BIRC6        |
| SYNCRIP     | ASCC3        |
| C10orf10    | POU2F2       |
| C10orf10    | IL13RA1      |
| CDC73       | PRKAR1A      |
| CDC73       | AK022030     |
| CDC73       | KIAA1279     |
| KIAA1279    | IDH1         |
| PRKAR1A     | RAB8A        |
| CUL2        | WNT4         |
| CUL2        | SRSF10       |
| CUL2        | TXNDC16      |
| CUL2        | NNT          |
| CUL2        | SRBD1        |
| CUL2        | MAGOH        |
| CUL2        | MDM1         |
| CUL2        | GNAI3        |
| CUL2        | LOC100130872 |
| CUL2        | CAPZA2       |
| SMC4        | PTPRG        |
| HPRT1       | MST4         |
| NNT         | ZFR          |
| SNRPD1      | WDR4         |
| SNRPD1      | APEX1        |
| SNRPD1      | DDX21        |
| WDR4        | ADSL         |
| HSPA14      | WRN          |
| HSPA14      | RNF138       |
| HSPA14      | TXLNG        |
| HSPA14      | C4orf46      |
| HSPA14      | NXT1         |

|              |          |
|--------------|----------|
| RNF138       | ZNF639   |
| NEDD1        | CAND1    |
| YTHDF3       | MST4     |
| GAS6         | CMTM7    |
| C14orf166    | CNIH1    |
| C14orf166    | APEX1    |
| RP11-97C16.1 | BIRC6    |
| SOCS3        | PTP4A3   |
| SOCS3        | C10orf10 |
| SOCS3        | MUC1     |
| MDN1         | COL9A2   |
| MDN1         | RXRA     |
| MDN1         | CCDC91   |
| MDN1         | CCNB1IP1 |
| LARP4        | SLC33A1  |
| LARP4        | CASP3    |
| LARP4        | DCP1B    |
| PSMA7        | PSMD1    |
| PPP1R15A     | SQSTM1   |
| ASCC3        | DCBLD1   |
| ASCC3        | NDUFAF4  |
| ASCC3        | C6orf203 |
| ADSL         | MTIF2    |
| ADSL         | OXCT1    |
| ADSL         | ENO1     |
| ADSL         | MRT04    |
| ADSL         | CECR5    |
| ADSL         | CPSF3    |
| CPSF3        | GNL2     |
| NDUFAF4      | C6orf203 |
| MRT04        | PA2G4    |
| MAT2A        | SNRNP40  |
| NUP133       | CPSF3    |
| NUP133       | PSMD1    |
| POLR1C       | C10orf2  |
| POLR2G       | PSMD13   |
| ESF1         | GTF3C3   |
| GTF3C3       | UTP20    |
| GTF3C3       | XPO1     |
| GTF3C3       | PEX1     |
| GTF3C3       | TSPAN33  |
| GTF3C3       | G2E3     |
| GTF3C3       | LTV1     |
| GTF3C3       | C1GALT1  |
| GTF3C3       | DHRS3    |
| TFAM         | GLUD1    |
| TFAM         | HSPA14   |

|        |          |
|--------|----------|
| TFAM   | CUL2     |
| ZFR    | SNX14    |
| ZFR    | MTMR12   |
| ZFR    | RANBP9   |
| ZFR    | KBTBD2   |
| ZFR    | METAP2   |
| ZFR    | HSF2     |
| ZFR    | ILF3     |
| ZFR    | ARMC8    |
| NOLC1  | DDX21    |
| AGPS   | POT1     |
| AGPS   | SF3A3    |
| AGPS   | NUDT21   |
| AGPS   | ORC4     |
| AGPS   | CSTF1    |
| AGPS   | MTPAP    |
| CSTF1  | TWISTNB  |
| CSTF1  | SRRD     |
| CSTF1  | TTPAL    |
| CSTF1  | FAM118B  |
| CSTF1  | PIGU     |
| CSTF1  | C12orf73 |
| CSTF1  | COMMD9   |
| NPEPPS | XPO1     |
| REEP2  | CUL2     |
| MTPAP  | KPNA3    |
| EXOSC3 | GEMIN5   |
| EXOSC3 | UMPS     |
| NUDT21 | DNAJA2   |
| SQSTM1 | PRR7     |
| ORC4   | XRN2     |
| ORC4   | NIF3L1   |
| POT1   | PHF14    |
| UMPS   | KNSTRN   |
| UMPS   | TOMM40L  |
| UMPS   | C6orf203 |
| UMPS   | GEMIN6   |
| UMPS   | ALAS1    |
| DDX21  | ETF1     |
| SF3A3  | RPA2     |
| SF3A3  | SNRNP40  |
| SF3A3  | APMAP    |
| SF3A3  | IGSF22   |
| MIS18A | CSTF1    |
| PRB1   | MUC1     |
| PRB1   | MLN      |
| PRB1   | BAZ1A    |

|              |               |
|--------------|---------------|
| PRB1         | CUL2          |
| LOC100131541 | USP34         |
| USP34        | SCAF11        |
| USP34        | ZMYND8        |
| MIR6733      | EBNA1BP2      |
| CCDC186      | MBNL1         |
| CCDC186      | PCNP          |
| CCDC186      | ANKRD12       |
| CCDC186      | BCLAF1        |
| LDHA         | DDX21         |
| AJ420595     | SON           |
| FOS          | DUSP1         |
| FOS          | FOSB          |
| PSMD1        | METTL21A      |
| SMC3         | RAD21         |
| SMC3         | ESF1          |
| SMC3         | NEDD1         |
| SMC3         | CBX3          |
| SCAF11       | ARID2         |
| DIEXF        | GEMIN5        |
| DIEXF        | GEMIN2        |
| GEMIN2       | HMGCS1        |
| GEMIN5       | TUBB          |
| GEMIN5       | NANP          |
| GEMIN5       | TTC4          |
| GEMIN5       | KEAP1         |
| GEMIN5       | MAT2A         |
| MKKS         | XRN2          |
| CAND1        | TBC1D15       |
| CAND1        | TXNL1         |
| CAND1        | KIAA1033      |
| MLN          | NUP153        |
| NUP153       | P2RX7         |
| NUP153       | RP11-500C11.3 |
| NUP153       | KLF11         |
| CAPZA2       | RALA          |
| TAF1D        | BAZ1A         |
| PRR7         | F12           |
| DNAJA2       | CSNK2A2       |
| DNAJA3       | NARS          |
| DNAJA3       | PUS1          |
| ALDH18A1     | OAT           |
| OTUD1        | JUN           |
| NAA25        | MDN1          |
| NIF3L1       | DNAJA3        |
| TIMM23B      | ALDH18A1      |
| TIMM23B      | NOLC1         |

|               |               |
|---------------|---------------|
| ZNF638        | YTHDC2        |
| ZNF638        | ZDHHC17       |
| ZNF638        | USP14         |
| ZNF638        | USP34         |
| ZNF638        | SMCHD1        |
| ZNF638        | SRGAP2        |
| ZNF638        | LOC101060691  |
| ZNF638        | RBM41         |
| ZNF638        | DCAF16        |
| ZNF638        | KBTBD3        |
| PUS7          | NOLC1         |
| PUS7          | POLR1C        |
| ZNF638-IT1    | ZNF638        |
| ZNF638-IT1    | ZFR           |
| LTV1          | CCNC          |
| MBNL1         | SMC4          |
| UTP20         | NAA25         |
| XPO1          | PPP1R12A      |
| XPO1          | WEE1          |
| XPO1          | ALMS1         |
| PCNP          | SETD2         |
| BCLAF1        | DNAJC25       |
| BCLAF1        | DNAJC25-GNG10 |
| BCLAF1        | AJ420595      |
| DNAJC25-GNG10 | DNAJC25       |
| ZBTB41        | IDH1          |
| ZBTB41        | AK022030      |
| ANKRD44       | F12           |
| ANKRD44       | PTP4A3        |
| F12           | GRK6          |
| BIRC6         | MIB1          |
| BIRC6         | TIA1          |
| BIRC6         | LLPH          |
| PTP4A3        | GAS6          |
| RAD21         | TROVE2        |
| TIA1          | MDM1          |
| TROVE2        | RAB3GAP2      |
| TROVE2        | SFT2D2        |
| TROVE2        | AK022030      |
| TROVE2        | CORO1C        |
| RANBP9        | CA5BP1        |
| PA2G4         | LSM12         |
| CCT2          | PSMA6         |
| CCT2          | GNL2          |
| CCT2          | PSMA1         |
| CCT2          | ADSL          |
| CCT2          | C12orf73      |

|        |          |
|--------|----------|
| SETD2  | ZNF639   |
| GNL2   | RPF2     |
| GNL2   | MIR6733  |
| GNL2   | PPIH     |
| GNL2   | EBNA1BP2 |
| PSMD14 | PSMD1    |
| PSMA1  | PSMD13   |
| PSMA6  | PRMT5    |
| PSMA6  | PSMC1    |
| PSMA6  | DTD2     |
| PSMA6  | FOSB     |



**Supplementary Table 16. Pathway analysis of subnetwork of IMiD treatment**

| PANTHER GO-Slim Biological Process                                      | raw P-value | FDR      |
|-------------------------------------------------------------------------|-------------|----------|
| defense response to virus (GO:0051607)                                  | 2.47E-09    | 4.43E-06 |
| regulation of multi-organism process (GO:0043900)                       | 4.35E-06    | 2.60E-03 |
| proteolysis involved in cellular protein catabolic process (GO:0051603) | 1.26E-04    | 4.54E-02 |
| cellular protein catabolic process (GO:0044257)                         | 1.34E-04    | 4.02E-02 |
| metabolic process (GO:0008152)                                          | 2.76E-06    | 2.48E-03 |
| organic substance metabolic process (GO:0071704)                        | 5.16E-05    | 2.32E-02 |
|                                                                         |             |          |

## Supplementary Figures

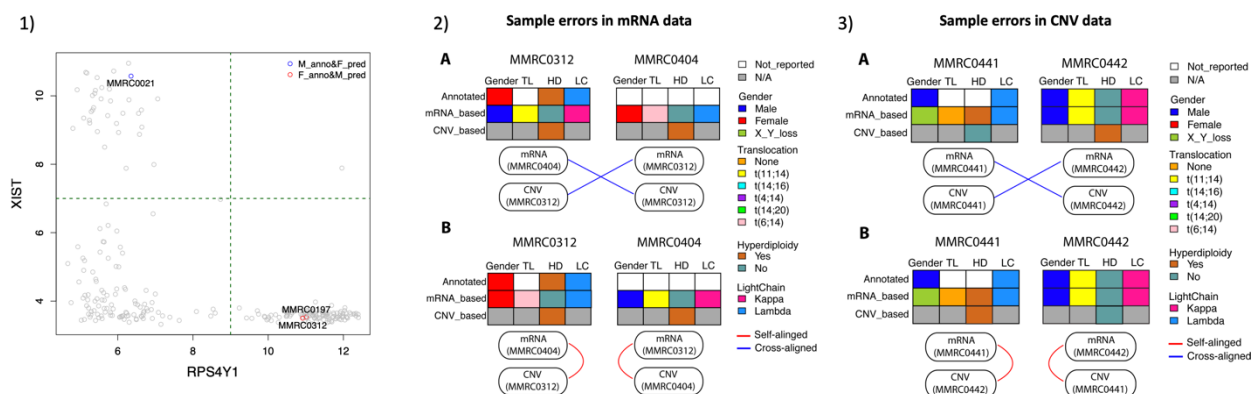

**Supplementary Figure 1.** Potential sample label errors in the dataset. 1) Scatter plot of expression of two sex related genes: *XIST* and *RPS4Y1*; 2-3) Sample swaps identified by *proMODMatcher*.



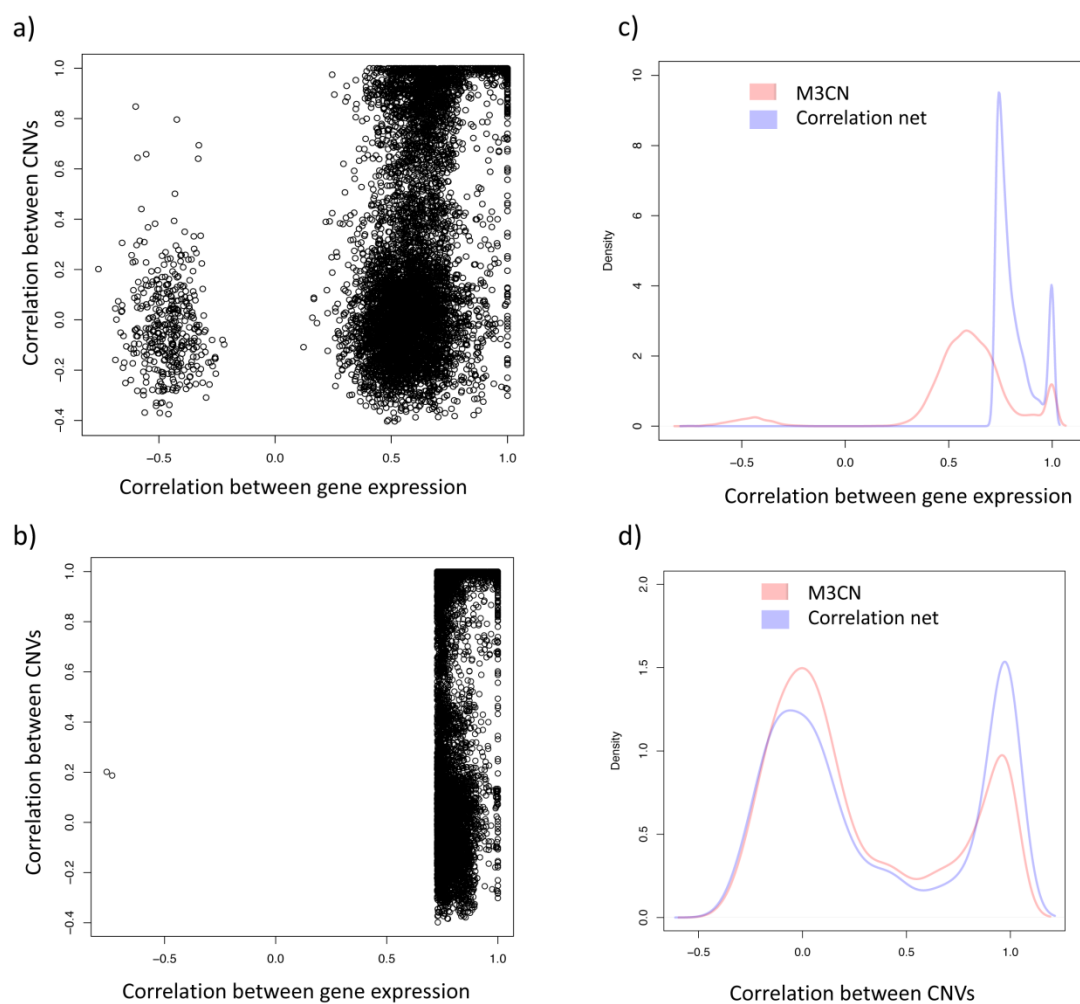

**Supplementary Figure 3.** Distribution of correlations between gene expression, and correlations between CNVs. A) A scatter plot of correlations between gene expression (x-axis) and CNV (y-axis) profiles for gene pairs connected in M3CN; b) a scatter plot of correlations between gene expression (x-axis) and CNV (y-axis) profiles for the most correlated gene pairs based on gene expression profiles (correlation-based network); c) histograms of gene expression correlations; d) histograms of gene CNV correlations.

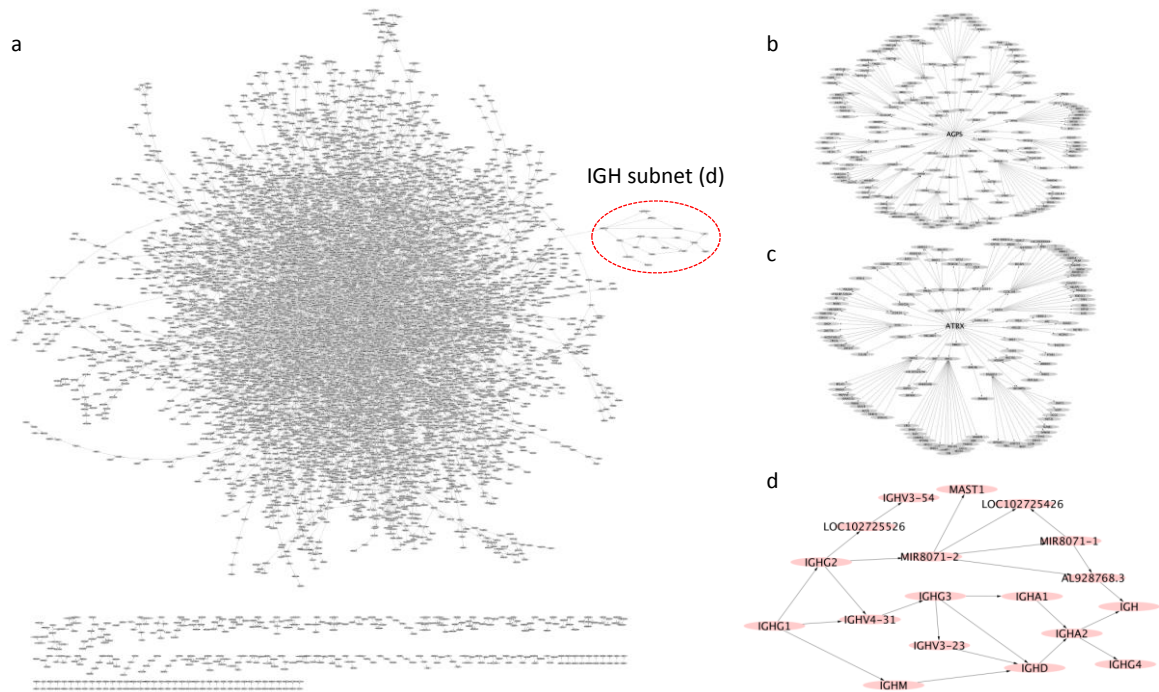

**Supplementary Figure 4. The M3CN, hub genes, and IGH subnet.** a) The global view of M3CN ; b) and c) the two most connected genes, *AGPS* (Alkylglycerone Phosphate Synthase) and *ATRX* (Alpha Thalassemia/Mental Retardation Syndrome X-Linked), regulated dozens of genes directly (41 and 32 respectively); d) the IGH subnet was disconnected from the rest of M3CN.

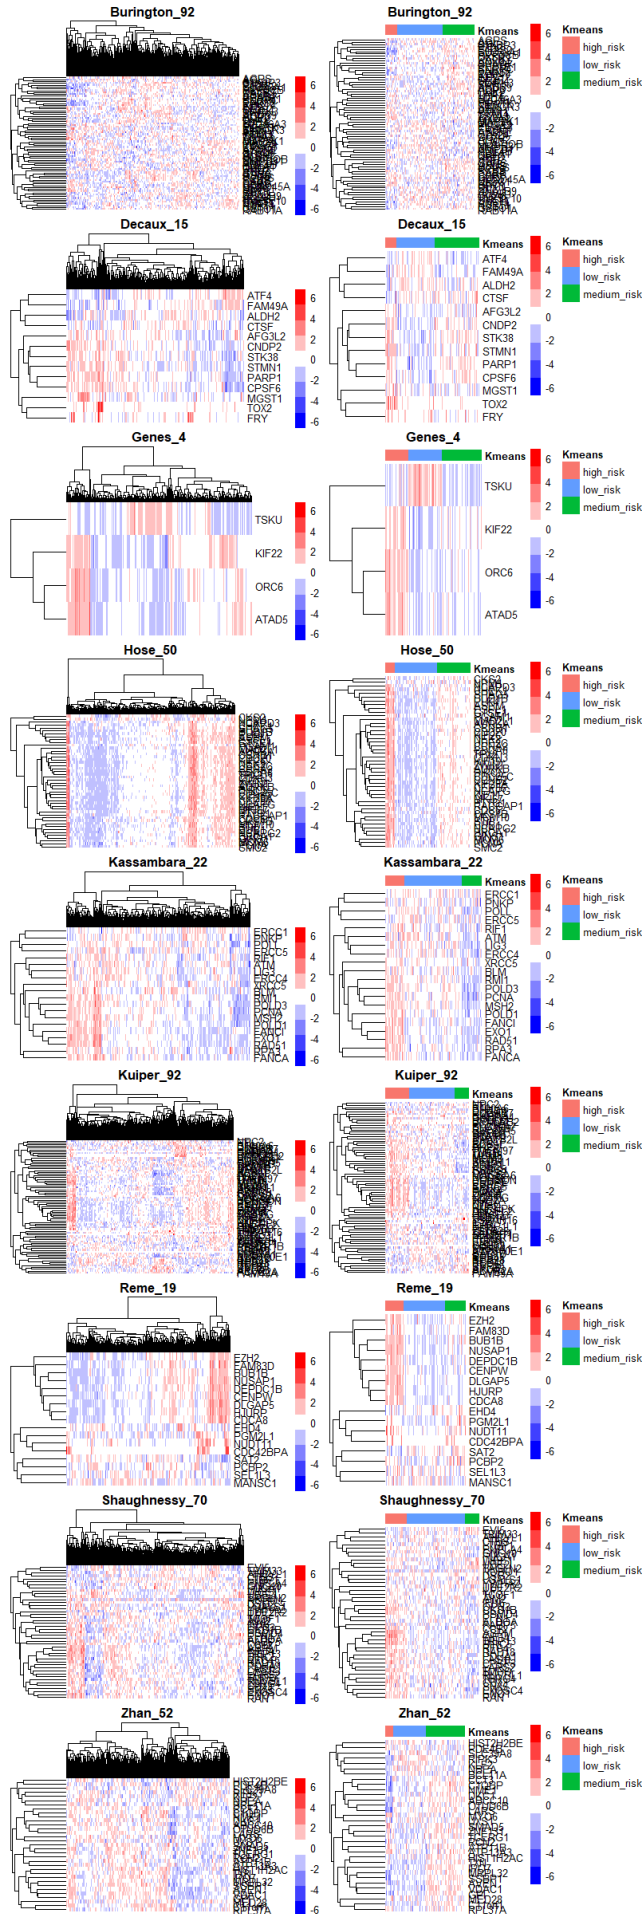

**Supplementary Figure 5.** Results of hierarchical clustering (left panels) and k-mean clustering (k=3, right panels) RNAseq data of the MMRF-CoMMpass cohort based on genes in the different prognostic signatures.

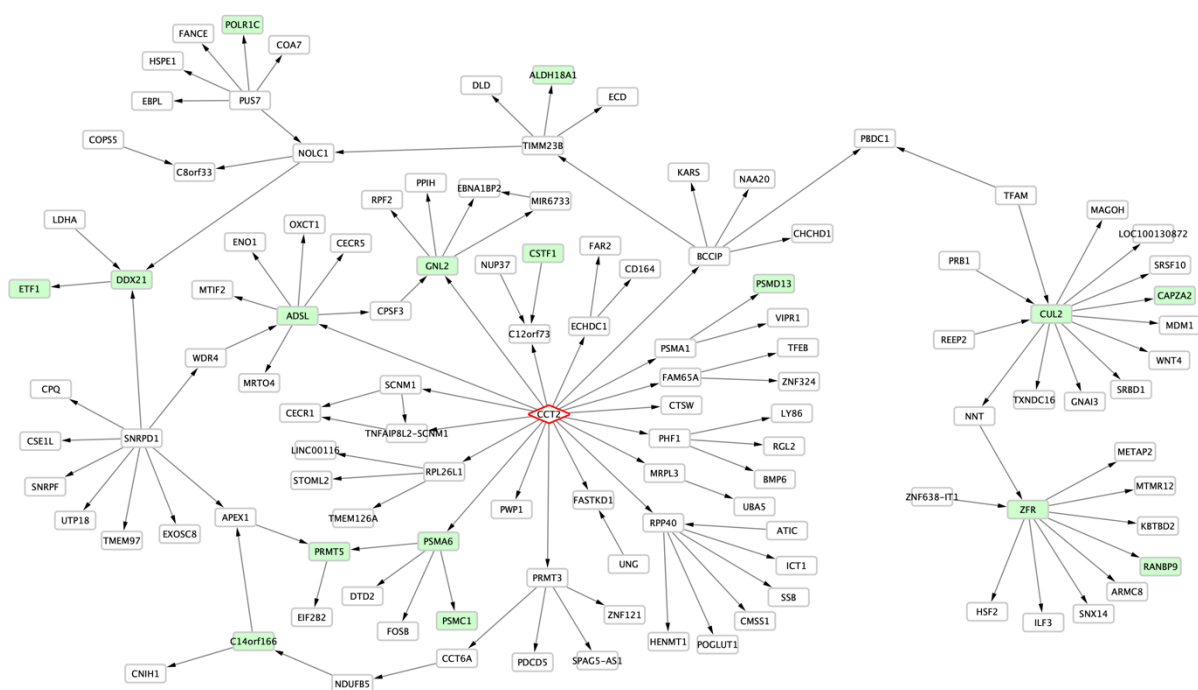

**Supplementary Figure 6** The subnetwork generated based on Zhu\_244 (subnetwork\_Zhu\_244), the diamond shape with red border indicates key regulator gene. Nodes in green are genes in Zhu\_244.



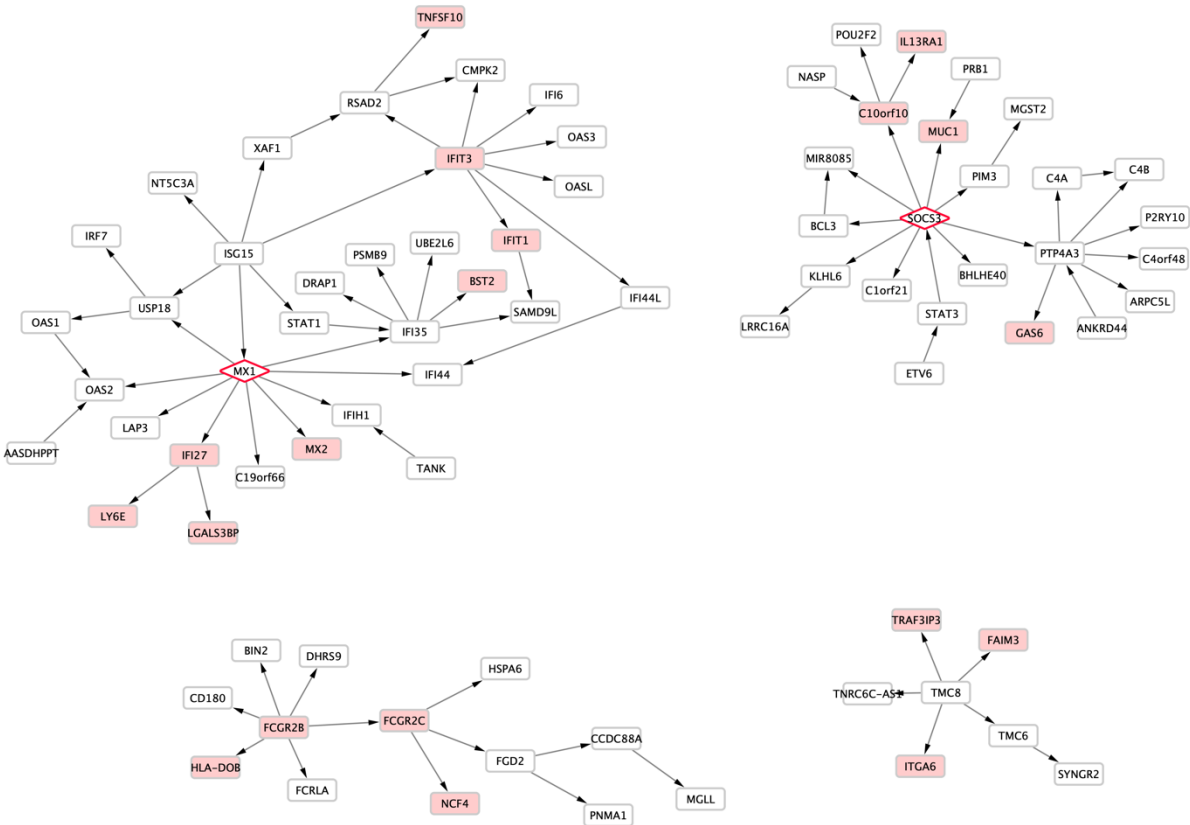

**Supplementary Figure 7** The subnetwork generated based on Bhutani\_176 (subnetwork\_Bhutani\_176). The diamond shape with red border indicates key regulator gene. Nodes in red are genes in Bhutani\_176.

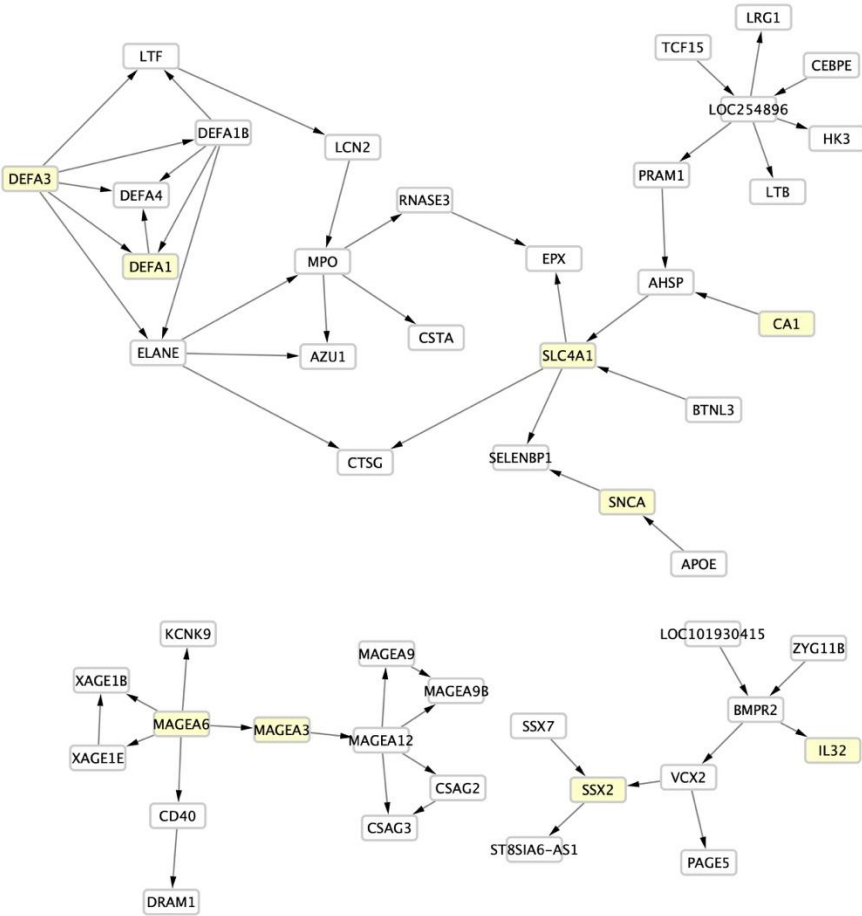

**Supplementary Figure 8** subnetworks generated based on Mulligan\_100 (subnetwork\_Mulligan\_100), nodes in yellow are genes in Mulligan\_100

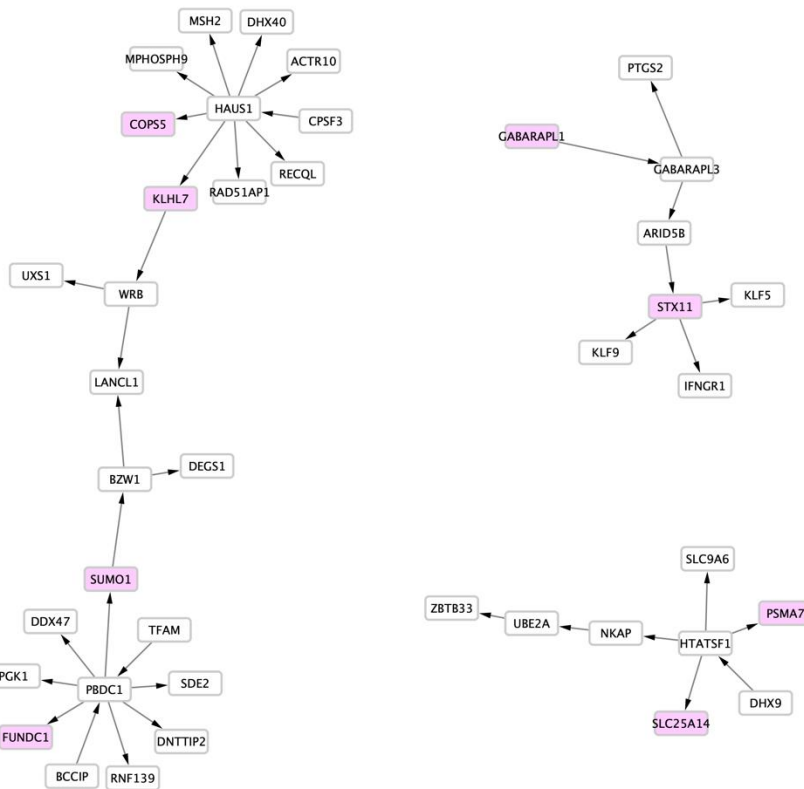

**Supplementary Figure 9** The subnetworks generated based on Shaughnessy\_80 (subnetwork\_ Shaughnessy\_80), nodes in pink are genes in Shaughnessy\_80.

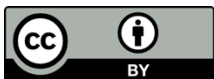

Supplement: cancers-11-01452-s001.pdf [file cancers-11-01452-s001.pdf]
